# Supplementary material for: Lung function, proteomic signatures, and risk of metabolic dysfunction-associated steatotic liver disease
Source: Research Square preprint supplement (doi:10.21203/rs.3.rs-6381296/v1), 2025-04-08
Supplement: Supplementary file 1 [file 0eb41e30cee1c946e6dba5a1.xlsx]

## Sheet: Table S4
Table S4. Baseline characteristics of study participants included in proteomic analysis.
Characteristic	Overall (n=47,055)	Incident MASLD (n=652)	Non-MASLD (n=46,403)	P value
Age, years	56.6 (8.2)	57.3 (7.7)	56.6 (8.2)	0.045
Sex, %				0.018
Female	25,677 (54.6)	326 (50.0)	25,351 (54.6)
Male	21,378 (45.4)	326 (50.0)	21,052 (45.4)
Race, %				0.759
White	41,392 (88.0)	571 (87.6)	40,821 (88.0)
Non-White	5,663 (12.0)	81 (12.4)	5,582 (12.0)
Townsend Deprivation Index, %	-1.3 (3.1)	-0.4 (3.4)	-1.3 (3.1)	<0.001
Education, %				<0.001
College degree or above	15,423 (33.1)	153 (23.8)	15,270 (33.3)
High school or below	31,132 (66.9)	491 (76.2)	30,641 (66.7)
BMI, kg/m2	27.4 (4.7)	31.0 (5.6)	27.3 (4.7)	<0.001
Smoking status, %				<0.001
Non-smokers	26,014 (55.5)	283 (43.5)	25,731 (55.6)
Former smokers	16,204 (34.6)	273 (42.0)	15,931 (34.4)
Current smokers	4,686 (10.0)	94 (14.5)	4,592 (9.9)
Weekly alcohol intake, gram	123.2 (173.4)	167.6 (279.0)	122.6 (171.6)	<0.001
Alcohol consumption frequency, %				<0.001
Never	14,497 (30.8)	275 (42.2)	14,222 (30.7)
<3 times/week	12,285 (26.1)	145 (22.3)	12,140 (26.2)
≥3 times/week	20,233 (43.0)	231 (35.5)	20,002 (43.1)
Regular physical activity, %	36,669 (83.8)	458 (77.1)	36,211 (83.9)	<0.001
Metabolic syndrome components, %
Obesity	34,204 (72.7)	593 (91.0)	33,611 (72.4)	<0.001
High glycaemia/diabetes	2,900 (6.2)	115 (17.6)	2,785 (6.0)	<0.001
High blood pressure/hypertension	34,306 (72.9)	547 (83.9)	33,759 (72.8)	<0.001
High triglycerides	8,393 (17.8)	199 (30.5)	8,194 (17.7)	<0.001
Low HDL	14,465 (30.7)	344 (52.8)	14,121 (30.4)	<0.001
Coronary heart disease, %	1,837 (3.9)	56 (8.6)	1,781 (3.8)	<0.001
Lung function measures
FEV1, L	2.8 (0.8)	2.7 (0.8)	2.8 (0.8)	<0.001
FVC, L	3.7 (1.1)	3.5 (1.1)	3.7 (1.1)	<0.001
PEF, L/min	405.9 (128.3)	390.5 (125.5)	406.1 (128.3)	0.002
FEV1/FVC	0.758 (0.072)	0.760 (0.074)	0.758 (0.072)	0.508
PM2.5 exposure, μg/m3	10.0 (1.1)	10.2 (1.1)	10.0 (1.1)	<0.001
NO2 exposure, μg/m3	29.2 (9.4)	30.7 (10.4)	29.1 (9.4)	<0.001
Data were presented as mean (SD) or n (percentage). P values were calculated using t-test for continuous variables or Chi-square test for categorical variables.
Abbreviations: MASLD, metabolic dysfunction-associated steatotic liver disease; FEV1, forced expiratory volume in 1s; FVC, forced vital capacity; PEF, peak expiratory flow; HDL, high-density lipoprotein; PM2.5, particulate matter with aerodynamic diameters of < 2.5 µm; NO2, nitrogen dioxide.
