# Supplementary material for: Lung function, proteomic signatures, and risk of metabolic dysfunction-associated steatotic liver disease
Source: Research Square preprint supplement (doi:10.21203/rs.3.rs-6381296/v1), 2025-04-08
Supplement: Supplementary file 2 [file 128fa05669c4be5e1d83b151.xlsx]

## Sheet: Table S3
Table S3. Variables and their field ids for this study.
	Categories	Field id	Description
Exposure	FEV1	3063	Forced expiratory volume in 1-second
	FVC	3062	Forced vital capacity (FVC)
	PEF	3064	Peak expiratory flow (PEF)
Outcome	MASLD	41271	Diagnoses - ICD9
		41281	Date of first in-patient diagnosis - ICD9
		41270	Diagnoses - ICD10
		41280	Date of first in-patient diagnosis - ICD10
		40001	Underlying (primary) cause of death: ICD10
		40002	Contributory (secondary) causes of death: ICD10
		40000	Date of death
	PDFF	40061	Proton density fat fraction (PDFF)
	cT1	40062	Liver iron corrected T1 (ct1)
Protein	Protein	30903	UKB-PPP Consortium selected participant
	Protein	30900	Number of proteins measured
Covarietes	Age	21003	Age when attended assessment centre
	Sex	31	Sex
	Race	21000	Ethnic background
	Education	6138	Qualifications
	Townsend deprivation index	189	Townsend deprivation index at recruitment
	Smoking	20116	Smoking status
	Alcohol intake	20117	Alcohol drinker status
		1558	Alcohol intake frequency
		1568	Average weekly red wine intake
		1578	Average weekly champagne plus white wine intake
		1588	Average weekly beer plus cider intake
		1598	Average weekly spirits intake
		1608	Average weekly fortified wine intake
		5364	Average weekly intake of other alcoholic drinks
	Physical activity	894	Duration of moderate activity
		914	Duration of vigorous activity
		884	Number of days/week of moderate physical activity 10+ minutes
		904	Number of days/week of vigorous physical activity 10+ minutes
	Metabolic syndrome	21001	Body mass index (BMI)
		48	Waist circumference
		30750	Glycated haemoglobin (HbA1c)
		20003	Treatment/medication code
		6177	Medication for cholesterol, blood pressure or diabetes
		6153	Medication for cholesterol, blood pressure, diabetes, or take exogenous hormones
		4080	Systolic blood pressure, automated reading
		4079	Diastolic blood pressure, automated reading
		30870	Triglycerides
		30760	HDL cholesterol, mmol/L
	CHD at baseline	41270	Diagnoses - ICD10
		41280	Date of first in-patient diagnosis - ICD10
	Ambient air pollution	24006	Particulate matter air pollution (pm2.5); 2010
		24016	Nitrogen dioxide air pollution; 2005
		24017	Nitrogen dioxide air pollution; 2006
		24018	Nitrogen dioxide air pollution; 2007
		24003	Nitrogen dioxide air pollution; 2010
