# Supplementary material for: Lung function, proteomic signatures, and risk of metabolic dysfunction-associated steatotic liver disease
Source: Research Square preprint supplement (doi:10.21203/rs.3.rs-6381296/v1), 2025-04-08
Supplement: Supplementary file 3 [file 17a1e9e53283259f10200bc7.xlsx]

## Sheet: Table S1
Table S1. Codes used in the UK Biobank study to identify incident MASLD.
Outcome	ICD-9	ICD-10
MASLD	571.8	K75.8, K76.0
Excluding other liver diseases at/before baseline
Hemochromatosis		E83.1
Wilson		E83.0
Alpha-1-antitrypsin deficiency		E88.0
Chronic hepatitis, unspecified		K73.9, K73.2
Budd-Chiari		I82.0, K76.5
Autoimmune liver disease (AIH, PBC, PSC)		K83.0, K74.3, K75.4
Secondary or unspecified biliary cirrhosis		K74.4, K74.5
Viral hepatitis		B16, B17, B18, B19
Excluding alcohol/drug use disorder at/before baseline
Codes associated with alcohol use disorder		F10
Codes associated with consequence of alcohol		E24.4, G62.1, I42.6, K29.2, G31.2, G72.1, K85.2, K86.0, T51.0, T51.9, Y57.3, Z50.2, Z71.4, Z72.1, K70, X65
Codes associated with drug use disorders except nicotine/caffeine		F11-F14, F16, F18, F19
