# Supplementary material for: Lung function, proteomic signatures, and risk of metabolic dysfunction-associated steatotic liver disease
Source: Research Square preprint supplement (doi:10.21203/rs.3.rs-6381296/v1), 2025-04-08
Supplement: Supplementary file 4 [file 18a2f81ddd7a01da88998103.xlsx]

## Sheet: Table S5
Table S5. Associations between lung function and protein biomarkers.
Assay	All-FEV1				All-FVC				All-PEF
	Estimates	P-value	FDR		Estimates	P-value	FDR		Estimates	P-value	FDR
A1BG	-0.0136931	1.34e-26	3.91e-23		-0.0136215	3.26e-30	9.52e-27		-0.0106775	1.78e-10	5.2e-07
AAMDC	-0.00658	7.74e-08	0.000226		-0.0071655	3.12e-10	9.11e-07		-0.0014109	0.378348	1
AARSD1	-0.0036262	0.0014018	1		-0.0047027	8.28e-06	0.0241669		0.0015565	0.294871	1
ABCA2	-0.0042745	0.0005388	1		-0.005189	6.4e-06	0.0186966		-0.0018897	0.239831	1
ABHD14B	-0.0040721	0.0002749	0.802583		-0.0041792	5.91e-05	0.172511		-0.000366	0.803448	1
ABL1	-0.0063395	1.75e-08	5.12e-05		-0.0076034	3.51e-13	1.03e-09		-0.000262	0.858823	1
ABO	-0.0011672	0.331287	1		-0.0021665	0.0524431	1		-0.0008556	0.585326	1
ABRAXAS2	-0.0072594	3.36e-09	9.82e-06		-0.0090341	2.67e-15	7.81e-12		-0.0030569	0.0557982	1
ACAA1	-0.0127932	1.23e-28	3.6e-25		-0.014172	0	0		-0.0086101	1.18e-08	3.44e-05
ACADM	-0.0008761	0.470363	1		-0.0007291	0.518343	1		0.0010027	0.526283	1
ACADSB	-0.0090011	7.15e-14	2.09e-10		-0.0091763	2.34e-16	6.82e-13		-0.0030572	0.0516339	1
ACAN	0.0161645	0	0		0.0153849	0	0		0.0117187	1.65e-13	4.82e-10
ACE	0.000218	0.857319	1		0.0004274	0.704684	1		0.0018142	0.251768	1
ACE2	-0.0177169	0	0		-0.0203861	0	0		-0.010518	3.84e-10	1.12e-06
ACHE	0.0062899	9.89e-07	0.0028888		0.0048354	5.25e-05	0.153245		0.0080942	1.32e-06	0.0038598
ACOT13	-0.0096952	9.97e-16	2.91e-12		-0.009576	1.46e-17	4.28e-14		-0.0050664	0.0013205	1
ACOX1	-0.0070789	2.05e-10	6e-07		-0.0070878	7.03e-12	2.05e-08		-0.0048578	0.0008649	1
ACP1	0.0020341	0.0985597	1		0.0008308	0.468162	1		0.0033166	0.0387205	1
ACP5	-0.0116289	9.05e-23	2.64e-19		-0.0120159	8.42e-28	2.46e-24		-0.0103765	1.86e-11	5.43e-08
ACP6	-0.0014342	0.200038	1		-0.0018007	0.0838751	1		-0.0016322	0.263344	1
ACRBP	-0.004281	0.0003941	1		-0.0048157	1.79e-05	0.0522729		-0.0037686	0.0167672	1
ACRV1	0.0039197	0.0372516	1		0.0033011	0.0592391	1		0.0034936	0.154214	1
ACSL1	0.0038444	0.0016367	1		0.0026585	0.019331	1		0.0008663	0.585597	1
ACTA2	-0.002644	0.0323631	1		-0.0003967	0.729033	1		-0.0049331	0.0023217	1
ACTN2	0.0025207	0.0446943	1		0.0040838	0.0004765	1		0.0021693	0.184366	1
ACTN4	-0.0017988	0.109211	1		-0.0021361	0.0403581	1		-0.0005631	0.70153	1
ACVRL1	-0.010135	3.45e-16	1.01e-12		-0.007121	7.06e-10	2.06e-06		-0.0098977	1.29e-09	3.75e-06
ACY1	-0.018519	0	0		-0.0234879	0	0		-0.0087055	1.35e-07	0.0003948
ACY3	-0.0100471	1.18e-15	3.45e-12		-0.0131022	3.25e-29	9.48e-26		-0.0054816	0.000794	1
ACYP1	-0.0096885	3.31e-15	9.67e-12		-0.0105156	3.75e-20	1.09e-16		-0.0020818	0.193801	1
ADA	-0.00504	7.53e-06	0.0219759		-0.0073844	1.71e-12	4.99e-09		-0.0012749	0.385085	1
ADA2	-0.0091944	1.1e-14	3.2e-11		-0.008184	1.23e-13	3.58e-10		-0.0111914	6.18e-13	1.8e-09
ADAM12	-0.0095033	6.2e-14	1.81e-10		-0.008385	1.08e-12	3.17e-09		-0.0102733	4.83e-10	1.41e-06
ADAM15	0.0023492	0.0384205	1		0.0019351	0.0657771	1		0.0007116	0.632384	1
ADAM22	0.0045609	7e-05	0.20451		0.0023616	0.026762	1		0.0046121	0.0021762	1
ADAM23	0.003878	0.000558	1		0.0021287	0.0416554	1		0.0030449	0.037725	1
ADAM8	-0.0073091	1.53e-10	4.47e-07		-0.0058739	3.21e-08	9.37e-05		-0.0070883	1.99e-06	0.0058232
ADAM9	-0.0017919	0.145848	1		-0.0003388	0.767364	1		-0.0046652	0.00373	1
ADAMTS1	-0.0031091	0.012018	1		-0.0026319	0.0222362	1		-0.0040704	0.011617	1
ADAMTS13	0.0066028	5.27e-09	1.54e-05		0.0038702	0.0002301	0.671909		0.0085862	5.95e-09	1.74e-05
ADAMTS15	-0.0140451	9.36e-33	2.73e-29		-0.0154167	0	0		-0.0089268	7.31e-09	2.14e-05
ADAMTS16	-0.0009751	0.415349	1		-0.0031958	0.0039733	1		-0.0017092	0.276112	1
ADAMTS4	-0.0081575	8.02e-11	2.34e-07		-0.0063915	4.35e-08	0.0001269		-0.0068104	3.13e-05	0.0913106
ADAMTS8	0.0045625	5.49e-05	0.160398		0.0020622	0.0500818	1		0.0074516	4.51e-07	0.0013168
ADAMTSL2	-0.0210291	0	0		-0.0212601	0	0		-0.0125529	6.48e-14	1.89e-10
ADAMTSL4	-0.0014434	0.252075	1		-0.0013931	0.234535	1		-0.0036324	0.0274877	1
ADAMTSL5	0.0051599	2.17e-05	0.063326		0.0057273	4.03e-07	0.0011775		0.0048319	0.0023242	1
ADCYAP1R1	0.0013958	0.214759	1		0.0015071	0.149067	1		0.0004652	0.75216	1
ADD1	-0.00187	0.127511	1		-0.0035541	0.0018446	1		0.0031026	0.0521478	1
ADGRB3	0.0030294	0.0075076	1		0.0034919	0.0009143	1		0.0007802	0.599773	1
ADGRD1	-0.0127937	1.79e-20	5.23e-17		-0.0126926	4.49e-23	1.31e-19		-0.0091579	3.47e-07	0.0010139
ADGRE1	-0.0053212	1.74e-05	0.050747		-0.0051046	9.27e-06	0.0270553		-0.0058444	0.0003017	0.881051
ADGRE2	0.0070776	1.86e-09	5.42e-06		0.0033517	0.0022265	1		0.0061509	6.21e-05	0.181425
ADGRE5	0.0073784	4.56e-10	1.33e-06		0.0032532	0.0030935	1		0.0072378	2.8e-06	0.0081715
ADGRF5	-0.0117426	1.97e-21	5.76e-18		-0.0113687	4.42e-23	1.29e-19		-0.007541	2.97e-06	0.0086751
ADGRG1	-0.009397	5.32e-14	1.55e-10		-0.0109656	3.41e-21	9.95e-18		-0.0042823	0.0088312	1
ADGRG2	0.0157922	5.76e-36	1.68e-32		0.016668	0	0		0.0084152	3.56e-07	0.00104
ADGRV1	0.000163	0.893972	1		0.000307	0.787033	1		0.0001346	0.932784	1
ADH1B	-0.0100101	9.71e-15	2.84e-11		-0.0139659	3.23e-31	9.43e-28		-0.0046208	0.0060729	1
ADH4	-0.013128	5.98e-26	1.74e-22		-0.0178797	0	0		-0.0061658	0.0001621	0.473432
ADIPOQ	0.0076178	4.07e-07	0.0011879		0.0139187	2.28e-23	6.66e-20		-0.0028547	0.14557	1
ADM	-0.0235962	0	0		-0.0206652	0	0		-0.0203263	1.45e-33	4.24e-30
ADRA2A	0.0032129	0.0085648	1		0.0027558	0.0154347	1		0.0019218	0.226967	1
AFAP1	0.0009437	0.440155	1		0.000864	0.447355	1		0.0014084	0.376269	1
AFM	-0.0109727	1.26e-17	3.67e-14		-0.0163343	0	0		-0.0005353	0.74931	1
AFP	-0.0021511	0.0625222	1		-0.002584	0.0160687	1		-0.0023893	0.114883	1
AGBL2	0.0030686	0.0121215	1		0.0023235	0.040978	1		0.0017647	0.26892	1
AGER	0.0265844	0	0		0.0267428	0	0		0.0160259	3.35e-26	9.77e-23
AGR2	-0.003855	0.0008322	1		-0.002038	0.0565057	1		-0.0069632	4.11e-06	0.0119995
AGR3	-0.0115491	1.52e-23	4.43e-20		-0.0125109	1.82e-31	5.32e-28		-0.008376	3.13e-08	9.14e-05
AGRN	-0.0117805	1.32e-22	3.85e-19		-0.0128288	2.25e-30	6.58e-27		-0.00628	6.41e-05	0.187106
AGRP	0.0013459	0.23998	1		0.0001432	0.893096	1		-0.0010696	0.473956	1
AGT	0.0001967	0.872105	1		0.0009845	0.386114	1		-0.0004938	0.756813	1
AGXT	-0.0119912	2.37e-25	6.92e-22		-0.0149379	0	0		-0.0070312	3.22e-06	0.0093899
AHCY	-0.0091107	4.57e-16	1.33e-12		-0.0093988	1.76e-19	5.14e-16		-0.0044931	0.0022272	1
AHNAK	-0.0056402	1.33e-05	0.0387547		-0.0074793	5.23e-10	1.53e-06		0.0010038	0.553344	1
AHNAK2	0.0016652	0.181337	1		0.002095	0.070552	1		0.0010829	0.506174	1
AHSA1	-0.0028833	0.016756	1		-0.0027322	0.0147377	1		-0.0005875	0.708646	1
AHSG	-0.0010292	0.397419	1		-0.0018552	0.100885	1		0.0014222	0.3703	1
AHSP	-0.0003651	0.754416	1		-0.0013201	0.223258	1		0.0004741	0.755723	1
AIDA	0.0026738	0.0285273	1		0.0018385	0.105477	1		0.0011464	0.472893	1
AIF1	-0.0063232	2.27e-08	6.62e-05		-0.0068056	9.1e-11	2.66e-07		-0.0031368	0.0341978	1
AIF1L	-0.0033311	0.0063637	1		-0.0019981	0.0784345	1		-0.0035496	0.0261795	1
AIFM1	-0.0125817	2.94e-28	8.59e-25		-0.0138902	0	0		-0.0065754	1.05e-05	0.0306785
AK1	-0.0053496	2.45e-06	0.0071625		-0.0058434	2.94e-08	8.59e-05		-0.0010917	0.462796	1
AK2	-0.0066105	3.97e-08	0.0001159		-0.0071822	1.37e-10	4e-07		-0.0030441	0.0523347	1
AKAP12	-0.0010491	0.388168	1		-0.0005254	0.642185	1		-0.0018694	0.237615	1
AKR1B1	-0.0065599	5.89e-09	1.72e-05		-0.0067527	1.1e-10	3.2e-07		-0.0033559	0.0229975	1
AKR1B10	-0.0034276	0.0053027	1		-0.0035327	0.0020062	1		-0.002684	0.0951352	1
AKR1C4	-0.0023117	0.0397347	1		-0.0029209	0.0050567	1		-0.0017301	0.240394	1
AKR7L	-0.0049704	6.71e-05	0.19599		-0.0065961	1.27e-08	3.72e-05		-0.0039335	0.0154822	1
AKT1S1	-0.0086226	2.46e-14	7.17e-11		-0.0097571	1.25e-20	3.66e-17		-0.0037486	0.0116031	1
AKT2	-0.0059913	6.42e-07	0.0018741		-0.006226	2.64e-08	7.71e-05		-0.001771	0.259532	1
AKT3	-0.0049532	1.12e-05	0.0327328		-0.0061796	3.6e-09	1.05e-05		-0.0003557	0.809854	1
ALCAM	-0.0022391	0.0681571	1		-0.0029158	0.0105616	1		-0.0013607	0.39568	1
ALDH1A1	-0.0080256	1.07e-11	3.12e-08		-0.0108526	4.13e-23	1.21e-19		-0.00138	0.37069	1
ALDH2	-0.0013229	0.273045	1		-0.0019294	0.0854333	1		-0.0007581	0.630091	1
ALDH3A1	-0.0088185	1.14e-13	3.34e-10		-0.0096921	1.74e-18	5.09e-15		-0.0055283	0.0003512	1
ALDH5A1	-0.0087712	3.46e-13	1.01e-09		-0.0088777	2.39e-15	6.97e-12		-0.004423	0.0049491	1
ALMS1	0.0002451	0.839923	1		-0.0002596	0.818118	1		0.0016794	0.288455	1
ALPI	-0.0019942	0.104243	1		-0.0017755	0.119843	1		-0.0001846	0.908115	1
ALPP	-0.0143854	2.33e-27	6.8e-24		-0.0060705	8.78e-07	0.0025631		-0.0143014	1.91e-16	5.59e-13
AMBN	-0.0009724	0.385632	1		-0.0004839	0.641687	1		-0.0017358	0.236544	1
AMBP	-0.0074415	1.25e-09	3.65e-06		-0.006116	8.17e-08	0.0002386		-0.0097848	9.19e-10	2.68e-06
AMDHD2	-6.39e-05	0.957548	1		0.0003747	0.737078	1		0.0005485	0.726233	1
AMFR	-0.0027824	0.013466	1		-0.0031835	0.0022779	1		-0.0028213	0.0562849	1
AMIGO1	-7.07e-05	0.953765	1		-4.16e-05	0.970734	1		-0.0016528	0.300038	1
AMIGO2	-0.005735	3.76e-07	0.0010992		-0.0053111	4.13e-07	0.0012063		-0.004126	0.0052358	1
AMN	-0.002615	0.0213608	1		-0.0034672	0.0010052	1		-0.000266	0.857972	1
AMOT	-0.0080403	1.77e-09	5.17e-06		-0.0110787	4.78e-19	1.39e-15		-0.0002108	0.903594	1
AMOTL2	-0.0020584	0.0889863	1		-0.0033736	0.0027126	1		-7.94e-06	0.995988	1
AMPD3	0.0008155	0.500338	1		-0.0005543	0.622191	1		0.0047704	0.0024829	1
AMY1A_AMY1B_AMY1C	-0.0026585	0.0370272	1		-0.002396	0.043704	1		-0.0024543	0.140235	1
AMY2A	-0.0023361	0.0461974	1		-0.0023817	0.0287237	1		-0.0027092	0.0766322	1
AMY2B	-0.0014319	0.227323	1		-0.0014767	0.180614	1		-0.0016978	0.271679	1
ANG	-0.0099964	5.83e-17	1.7e-13		-0.009167	1.3e-16	3.8e-13		-0.0077692	6.48e-07	0.0018914
ANGPT1	-0.0070296	3.68e-10	1.08e-06		-0.0065131	4.48e-10	1.31e-06		-0.00362	0.0134428	1
ANGPT2	-0.010698	3.72e-20	1.09e-16		-0.0086287	1.61e-15	4.71e-12		-0.0055297	0.0002704	0.789601
ANGPTL1	-0.0023715	0.0394363	1		0.0003989	0.709227	1		-0.0058409	0.000107	0.312405
ANGPTL2	-0.0097721	9.92e-17	2.9e-13		-0.0118916	1.74e-27	5.07e-24		-0.0057978	0.0001594	0.465414
ANGPTL3	-0.0079579	2.77e-10	8.1e-07		-0.0055709	1.92e-06	0.0055937		-0.0086609	1.48e-07	0.0004308
ANGPTL4	-0.0073383	2.15e-10	6.26e-07		-0.0059069	3.93e-08	0.0001149		-0.0063238	2.72e-05	0.0793558
ANGPTL7	-0.0025049	0.0292721	1		-0.0034874	0.0011111	1		-0.0009774	0.514397	1
ANK2	-0.0015472	0.204739	1		-0.0019954	0.0789744	1		0.0016492	0.298984	1
ANKMY2	-0.0050179	4.16e-05	0.121565		-0.0058711	2.51e-07	0.0007339		-0.0007148	0.654181	1
ANKRA2	-0.0009355	0.444414	1		-0.0001076	0.924702	1		-0.0025554	0.108438	1
ANKRD54	-0.0012748	0.260819	1		-0.0021341	0.0426011	1		0.0018369	0.215883	1
ANP32C	0.0019268	0.11375	1		0.0016815	0.13776	1		0.0009472	0.552075	1
ANPEP	-0.0068923	9.61e-10	2.81e-06		-0.0092268	1.09e-18	3.17e-15		-0.004295	0.0035458	1
ANXA1	-0.0052574	2.21e-05	0.0644429		-0.0046659	5.2e-05	0.151735		-0.002841	0.0785316	1
ANXA10	-0.0102583	1.03e-18	3.01e-15		-0.0080305	8.67e-14	2.53e-10		-0.010596	3.71e-12	1.08e-08
ANXA11	-0.005268	2.57e-06	0.0075067		-0.0057507	3.4e-08	9.93e-05		-0.0022202	0.127928	1
ANXA2	-0.0105472	5.19e-17	1.51e-13		-0.011827	5.11e-24	1.49e-20		-0.0023859	0.147122	1
ANXA3	-0.0067565	1.41e-09	4.12e-06		-0.0075906	2.65e-13	7.74e-10		-0.0022038	0.130579	1
ANXA4	-0.008104	3.84e-13	1.12e-09		-0.0084046	4.89e-16	1.43e-12		-0.0032474	0.0261296	1
ANXA5	-0.0034054	0.0027245	1		-0.0022136	0.0354442	1		-0.0028961	0.0523619	1
AOC1	-0.0032398	0.0038638	1		-0.0030103	0.0038139	1		-0.0018107	0.217175	1
AOC3	0.0076228	1.19e-10	3.48e-07		0.007304	2.91e-11	8.5e-08		0.0044107	0.0043526	1
AP1G2	-0.0065778	5.69e-08	0.0001662		-0.007614	1.37e-11	3.99e-08		-0.0017354	0.272317	1
AP2B1	-0.0056952	3.19e-06	0.0093294		-0.0059448	1.72e-07	0.0005023		-0.0007863	0.62305	1
AP3B1	-0.0073816	1.11e-09	3.25e-06		-0.0084657	5.58e-14	1.63e-10		-0.0016151	0.307408	1
AP3S2	-0.0056861	2.44e-06	0.0071248		-0.0065019	6.73e-09	1.97e-05		-0.0010279	0.513316	1
APBB1IP	-0.0096813	3.09e-17	9.02e-14		-0.0110531	3.22e-25	9.39e-22		-0.0036056	0.0163372	1
APCS	-0.0236632	0	0		-0.0251127	0	0		-0.0127345	9.85e-12	2.88e-08
APEX1	-0.0095447	4e-17	1.17e-13		-0.0105481	1.68e-23	4.92e-20		-0.0047597	0.0013009	1
APLP1	-0.0053371	3.85e-06	0.0112359		-0.0062677	5.08e-09	1.48e-05		-0.0028599	0.0587184	1
APOA1	0.0015647	0.250356	1		0.0018273	0.148808	1		0.0022308	0.208881	1
APOA2	0.0030348	0.0185933	1		0.0057915	1.36e-06	0.0039612		-0.0037504	0.0258586	1
APOA4	0.0012967	0.288876	1		0.0015375	0.176225	1		-0.0012192	0.444481	1
APOB	-0.0004958	0.679827	1		-0.0007377	0.509022	1		0.0008742	0.577229	1
APOBR	-0.0036447	0.0030159	1		-0.0044237	0.0001082	0.315844		-0.001065	0.507421	1
APOC1	0.0010485	0.43159	1		0.0010687	0.388542	1		0.0002167	0.900798	1
APOD	-0.0003279	0.801623	1		0.001342	0.267934	1		0.0010078	0.554114	1
APOE	-0.0016974	0.161185	1		-0.0028574	0.0111882	1		0.0011177	0.479296	1
APOF	0.0221711	0	0		0.0235982	0	0		0.0132449	6.56e-14	1.92e-10
APOH	0.0019878	0.0786418	1		0.002502	0.0171396	1		-0.0016986	0.249561	1
APOL1	-0.0084322	1.07e-11	3.11e-08		-0.0084233	2.81e-13	8.21e-10		-0.0026319	0.104192	1
APOM	0.0019776	0.10757	1		0.0026017	0.0224886	1		-0.0019341	0.228415	1
APP	-0.0101652	1.66e-19	4.85e-16		-0.0092036	1.28e-18	3.75e-15		-0.0060746	3.57e-05	0.104213
APPL2	-0.0058258	1.74e-06	0.0050718		-0.0068371	1.6e-09	4.67e-06		-0.001237	0.435597	1
APRT	-0.0027698	0.0134137	1		-0.0031318	0.0026409	1		-0.0008538	0.561178	1
ARAF	-0.0031352	0.0098182	1		-0.0033445	0.0030609	1		0.0003119	0.843807	1
AREG	-0.0101832	3.83e-19	1.12e-15		-0.008468	1.24e-15	3.62e-12		-0.0096829	8.35e-11	2.44e-07
ARF6	-0.0076742	2.21e-10	6.46e-07		-0.0085822	2.25e-14	6.57e-11		-0.0029642	0.0605524	1
ARFIP1	-0.0055943	3.3e-06	0.0096358		-0.006268	2.08e-08	6.08e-05		-0.0019078	0.224228	1
ARG1	0.0017079	0.127598	1		0.0006017	0.564222	1		0.0032414	0.0267851	1
ARG2	-0.0015094	0.211405	1		-0.0018645	0.0967184	1		-0.0003209	0.838561	1
ARHGAP1	0.0009642	0.394	1		-4.23e-05	0.967858	1		0.0043155	0.0035689	1
ARHGAP25	-0.0044452	8.5e-05	0.248197		-0.0057035	5.59e-08	0.0001632		-0.0009485	0.521934	1
ARHGAP30	0.0023841	0.0500668	1		0.0016801	0.137675	1		-0.0001938	0.90279	1
ARHGAP45	-0.0074406	1.07e-09	3.12e-06		-0.0086494	2.47e-14	7.22e-11		-0.0020755	0.191503	1
ARHGAP5	-0.0021749	0.0756234	1		-0.0022923	0.0442514	1		-0.0010846	0.495959	1
ARHGEF1	-0.0082497	9.12e-12	2.66e-08		-0.0093044	1.28e-16	3.75e-13		-0.0031433	0.0462272	1
ARHGEF10	-0.0037519	0.0018672	1		-0.0051838	3.79e-06	0.0110785		-0.0011971	0.446951	1
ARHGEF12	-0.0048319	1.65e-05	0.0481207		-0.0065746	2.92e-10	8.52e-07		6.54e-05	0.964291	1
ARHGEF5	-0.0013232	0.280577	1		-0.0011356	0.319067	1		-0.0021665	0.175748	1
ARID3A	0.001381	0.259027	1		0.0002606	0.818738	1		-0.0005127	0.748087	1
ARID4B	-0.0027937	0.012988	1		-0.0028945	0.0054766	1		-0.0033265	0.0242452	1
ARL13B	-0.0044563	0.0002692	0.785935		-0.0054269	1.88e-06	0.0054903		-0.0017703	0.266157	1
ARL2BP	-0.0049632	4.84e-05	0.141324		-0.0065482	8.47e-09	2.47e-05		-0.0016167	0.309229	1
ARMCX2	0.0029929	0.0144995	1		0.0019748	0.0826477	1		0.0032277	0.0433326	1
ARNT	0.0040117	0.0003618	1		0.002569	0.0138396	1		0.0020291	0.167994	1
ARNTL	0.0013873	0.255523	1		0.0008846	0.436128	1		0.002851	0.0725908	1
ARSA	-0.0154664	0	0		-0.0150485	0	0		-0.0084944	1.68e-08	4.91e-05
ARSB	-0.0150347	0	0		-0.0145784	0	0		-0.007059	1.98e-06	0.0057813
ART3	0.01763	0	0		0.0178242	0	0		0.0146874	1.27e-19	3.71e-16
ART5	-0.0010756	0.379393	1		-0.0008347	0.462965	1		-0.0019759	0.215874	1
ARTN	-0.0028654	0.0106377	1		-0.0022162	0.0332324	1		-0.0009188	0.531336	1
ASAH1	-0.0110676	1.2e-19	3.5e-16		-0.0111723	6.98e-23	2.04e-19		-0.0038646	0.0155685	1
ASAH2	-0.0042147	0.0002611	0.762295		-0.006699	4.24e-10	1.24e-06		0.0007625	0.614627	1
ASGR1	-0.0176467	0	0		-0.0167434	0	0		-0.0148527	2.88e-20	8.42e-17
ASGR2	-0.0017669	0.149131	1		-1.55e-05	0.989175	1		-0.0046715	0.003475	1
ASPN	-0.00146	0.23981	1		-0.0025877	0.0251173	1		0.0016644	0.304778	1
ASPSCR1	-0.007419	9.7e-10	2.83e-06		-0.0084285	7.94e-14	2.32e-10		-0.0016986	0.2835	1
ASRGL1	-0.003839	0.0016516	1		-0.0052377	3.89e-06	0.0113698		3.6e-05	0.98202	1
ASS1	-0.0072496	2.26e-08	6.6e-05		-0.0113416	5.52e-21	1.61e-17		-0.0029913	0.0763866	1
ATF2	-0.0006641	0.554611	1		-0.0013283	0.202144	1		-0.000383	0.795197	1
ATF4	0.0010411	0.394684	1		0.0006589	0.562835	1		0.0029695	0.0621098	1
ATG16L1	-0.0083042	6.7e-12	1.96e-08		-0.0096247	1.13e-17	3.29e-14		-0.0024111	0.127044	1
ATG4A	-0.004951	1.32e-05	0.0385954		-0.0058915	2.35e-08	6.86e-05		0.0002773	0.85219	1
ATOX1	-0.0075051	2.47e-11	7.21e-08		-0.0075247	6.32e-13	1.85e-09		-0.0019822	0.177023	1
ATP1B1	0.0029519	0.0156695	1		0.0022603	0.046868	1		0.003299	0.0379785	1
ATP1B2	0.0002341	0.84792	1		0.0002481	0.827212	1		-0.0020811	0.190247	1
ATP1B3	0.001895	0.120527	1		0.0012381	0.275905	1		0.0017796	0.262602	1
ATP1B4	0.0012943	0.290322	1		0.0026272	0.0211167	1		-0.000215	0.892622	1
ATP2B4	0.0016988	0.16454	1		0.0007528	0.508277	1		0.0023576	0.138305	1
ATP5F1D	0.0011079	0.363876	1		0.0001668	0.883247	1		-0.0004907	0.757317	1
ATP5IF1	-0.0104657	8.12e-21	2.37e-17		-0.0107137	7.26e-25	2.12e-21		-0.0056964	9.47e-05	0.276461
ATP5PO	-0.0019801	0.0780303	1		-0.003059	0.0033028	1		-0.0014585	0.322766	1
ATP6AP2	-0.001449	0.201173	1		-0.0029246	0.0054557	1		-0.001534	0.301385	1
ATP6V1D	-0.0003347	0.764049	1		-3.99e-06	0.996929	1		-0.0004213	0.772811	1
ATP6V1F	-0.0051617	4.63e-06	0.0135294		-0.0053032	3.83e-07	0.0011169		-0.0021464	0.147193	1
ATP6V1G1	-0.0070501	8.73e-09	2.55e-05		-0.0077873	8.21e-12	2.4e-08		-0.0022189	0.166157	1
ATP6V1G2	0.0001119	0.926968	1		-0.0003108	0.784452	1		0.0009691	0.541724	1
ATRAID	-0.0010438	0.385729	1		-0.0005211	0.64132	1		-0.0018599	0.236483	1
ATRN	-0.0090284	3.09e-13	9.01e-10		-0.0133003	6.72e-31	1.96e-27		-0.0031015	0.0548964	1
ATXN10	-0.003269	0.00365	1		-0.0040476	0.0001026	0.299679		0.000115	0.937893	1
ATXN2	-0.0001659	0.89245	1		-0.0018817	0.0989169	1		0.0036883	0.0212333	1
ATXN2L	-0.0044787	0.0002038	0.59509		-0.0057711	2.64e-07	0.0007702		0.0005491	0.727155	1
ATXN3	-0.0053807	9.47e-06	0.0276456		-0.0064722	9.98e-09	2.91e-05		0.0001071	0.946095	1
AXIN1	-0.0050271	7.76e-06	0.0226515		-0.00672	1.29e-10	3.78e-07		0.0008146	0.577797	1
AXL	0.0036664	0.0013433	1		0.0028706	0.0068155	1		-0.0002668	0.858251	1
AZI2	-0.0046756	0.0001062	0.309999		-0.0059879	9.35e-08	0.000273		8.61e-05	0.956362	1
AZU1	-0.0047912	2.87e-05	0.0836861		-0.0051818	1.16e-06	0.003397		-0.0035811	0.01645	1
B2M	-0.0086423	8.65e-12	2.53e-08		-0.0063028	8.59e-08	0.0002509		-0.0123644	6.86e-14	2e-10
B3GAT3	0.0001734	0.886999	1		-0.0007144	0.529426	1		-0.0003067	0.846824	1
B3GNT7	-0.0080398	3.69e-10	1.08e-06		-0.0070384	3.65e-09	1.07e-05		-0.0082771	8.07e-07	0.0023553
B4GALT1	-0.0027611	0.0164898	1		-0.0030692	0.0041737	1		-0.0026321	0.0796356	1
B4GAT1	-0.0075963	7.24e-11	2.11e-07		-0.0074819	4.81e-12	1.41e-08		-0.0070816	3.26e-06	0.0095305
BABAM1	-0.0001552	0.899053	1		-0.0001928	0.865401	1		-0.0014782	0.353691	1
BACH1	0.0009647	0.387862	1		0.0004802	0.644026	1		0.0017088	0.239946	1
BAG3	-0.000891	0.435063	1		-5.45e-05	0.959011	1		-0.0004277	0.775243	1
BAG4	-0.0065537	1.08e-07	0.0003152		-0.0072423	2.72e-10	7.94e-07		-0.0021711	0.176867	1
BAG6	-0.0053827	1.83e-06	0.005358		-0.0073638	1.89e-12	5.51e-09		0.000371	0.801962	1
BAIAP2	-0.0167257	0	0		-0.0184785	0	0		-0.0109874	1.25e-12	3.64e-09
BAMBI	-0.0003085	0.788317	1		0.0008316	0.435726	1		-0.003244	0.0310737	1
BANK1	-0.0048914	1.36e-05	0.0396726		-0.0068174	7.03e-11	2.05e-07		2.98e-05	0.983776	1
BAP18	-0.0116582	2.55e-21	7.45e-18		-0.0124803	9.42e-28	2.75e-24		-0.0071613	7.97e-06	0.0232793
BATF	-0.0006087	0.617626	1		-0.000506	0.655481	1		1.79e-05	0.991065	1
BAX	-0.0065361	6.6e-09	1.93e-05		-0.0068572	4.98e-11	1.45e-07		-0.0026629	0.0719394	1
BCAM	0.0050796	9.06e-06	0.0264593		0.0044548	2.77e-05	0.0808964		0.0050873	0.0006599	1
BCAN	-0.0022728	0.055666	1		-0.0042598	0.0001137	0.332003		0.0031082	0.0460292	1
BCAT1	-0.0083898	7.23e-12	2.11e-08		-0.0085175	7.47e-14	2.18e-10		-0.0032313	0.0433197	1
BCAT2	0.0011863	0.332319	1		0.0016111	0.156593	1		0.0015385	0.335274	1
BCHE	-0.0114426	2.69e-19	7.86e-16		-0.0157948	0	0		-0.0051183	0.0021141	1
BCL2	-0.0031028	0.0108613	1		-0.0034377	0.0023978	1		-0.0005616	0.72402	1
BCL2L1	-0.0075785	2.99e-10	8.72e-07		-0.0082269	1.89e-13	5.51e-10		-0.0025981	0.0975702	1
BCL2L11	-0.0053115	2.71e-06	0.0079252		-0.00401	0.0001403	0.409547		-0.0055955	0.0001466	0.428001
BCL2L15	-0.0027236	0.0272364	1		-0.0028594	0.0126709	1		-0.0022569	0.160257	1
BCL7A	-0.0008767	0.47363	1		-0.0015133	0.183943	1		0.0003373	0.832238	1
BCL7B	0.0008488	0.481609	1		0.0006887	0.538966	1		0.0006209	0.693047	1
BCR	-0.0067745	1.68e-09	4.89e-06		-0.0082179	3.8e-15	1.11e-11		-0.0023349	0.110613	1
BDNF	-0.0075257	4.69e-10	1.37e-06		-0.0067205	2.24e-09	6.55e-06		-0.003959	0.0121208	1
BECN1	-0.0067839	3.45e-08	0.0001007		-0.0081087	1.32e-12	3.85e-09		-0.0007202	0.654248	1
BEX3	0.0013841	0.258057	1		0.0010224	0.369476	1		0.0012911	0.417543	1
BGLAP	0.007624	7.16e-10	2.09e-06		0.0074036	1.25e-10	3.66e-07		0.0030604	0.0582636	1
BGN	0.0041099	0.0003302	0.964303		0.0021748	0.0407564	1		0.0030239	0.0436526	1
BHLHE40	0.0019249	0.115502	1		0.0025077	0.0273614	1		0.001501	0.346901	1
BHMT2	0.0015221	0.212072	1		0.0007368	0.516455	1		0.001133	0.475414	1
BID	-0.0088321	4.85e-15	1.42e-11		-0.0097734	1.19e-20	3.46e-17		-0.0033438	0.0227961	1
BIN2	-0.0046769	3.02e-05	0.0881151		-0.0054947	1.3e-07	0.0003799		0.000206	0.888027	1
BIRC2	-0.0043922	9.66e-05	0.282162		-0.005849	2.23e-08	6.52e-05		0.0003187	0.82893	1
BLMH	-0.0068296	1.84e-09	5.38e-06		-0.0092753	1.49e-18	4.34e-15		0.0014505	0.328025	1
BLNK	-0.0081823	3.83e-11	1.12e-07		-0.0081401	1.53e-12	4.46e-09		-0.0061785	0.0001282	0.374393
BLOC1S2	0.0004942	0.686284	1		0.0005592	0.622892	1		-0.0011508	0.471028	1
BLOC1S3	-0.0067349	2.27e-08	6.62e-05		-0.00772	5.43e-12	1.59e-08		-0.0019469	0.215039	1
BLVRB	-0.0029038	0.0107391	1		-0.0037814	0.0003469	1		-0.0003207	0.829106	1
BMP10	0.001885	0.150694	1		0.0018601	0.127374	1		0.0005707	0.738282	1
BMP4	0.0017885	0.114212	1		0.0020893	0.0471029	1		0.0015442	0.298639	1
BMP6	-0.0083843	1.18e-13	3.45e-10		-0.0085819	2.55e-16	7.44e-13		-0.0056172	0.0001503	0.438859
BMPER	-0.0088586	1.56e-12	4.55e-09		-0.0110987	1.65e-21	4.83e-18		-0.0054805	0.0007859	1
BNIP2	-0.004451	0.0002094	0.611497		-0.0044856	5.91e-05	0.172626		-0.0009605	0.540108	1
BNIP3L	-0.0058517	2.32e-06	0.0067856		-0.0064194	2.52e-08	7.36e-05		-0.0011371	0.481304	1
BOC	-0.006108	1.3e-07	0.0003809		-0.0067834	2.54e-10	7.41e-07		-0.003898	0.0101959	1
BOLA1	-0.005197	2.54e-05	0.0741905		-0.0056922	6.93e-07	0.0020247		-0.0010245	0.524698	1
BOLA2_BOLA2B	-0.0058554	2.17e-06	0.0063384		-0.0069332	1.62e-09	4.73e-06		-0.0006929	0.66817	1
BPIFA2	-0.006414	7.36e-07	0.0021502		-0.0061339	3.67e-07	0.0010719		-0.0056161	0.0009049	1
BPIFB1	-0.0170305	0	0		-0.0116661	3.86e-25	1.13e-21		-0.0154988	1.24e-22	3.63e-19
BPIFB2	-0.0010373	0.387792	1		-0.0005172	0.6435	1		-0.0018541	0.23724	1
BRAP	-0.0053787	9.07e-06	0.0264847		-0.0068205	1.42e-09	4.16e-06		-0.0008281	0.600969	1
BRD1	0.0015847	0.192112	1		0.0016656	0.140506	1		0.0014152	0.371616	1
BRD2	0.0006317	0.605514	1		9.51e-05	0.933326	1		0.0007504	0.638233	1
BRD3	-0.0011298	0.354282	1		-0.0022329	0.0492522	1		-0.0002089	0.895327	1
BRDT	-0.0044854	0.0002366	0.691005		-0.0045094	7.19e-05	0.210005		-0.0013822	0.384124	1
BRK1	-0.0052005	5.03e-06	0.0146734		-0.0049615	2.62e-06	0.0076437		-0.0024167	0.106225	1
BRME1	-0.0011321	0.354483	1		-0.0008041	0.479183	1		-0.0007361	0.644509	1
BRSK2	-0.0043295	0.0003251	0.949207		-0.0044846	6.22e-05	0.181648		-0.0006764	0.666986	1
BSG	-0.002408	0.0396751	1		-0.001747	0.108568	1		-0.0026512	0.0822871	1
BSND	0.0013703	0.262735	1		0.0014259	0.210592	1		0.0029788	0.0613685	1
BST1	-0.0041491	0.0002049	0.598356		-0.0050538	1.17e-06	0.0034139		-0.0002751	0.850457	1
BST2	-0.0166973	0	0		-0.0174524	0	0		-0.0127934	1.07e-17	3.14e-14
BTC	-0.002459	0.0294999	1		-0.0024114	0.0214929	1		-0.0007499	0.612134	1
BTD	-0.0043694	0.0003596	1		-0.0077375	1.07e-11	3.11e-08		0.0008098	0.612125	1
BTLA	-0.0024409	0.0459775	1		-0.0017445	0.1255	1		-0.0024483	0.124024	1
BTN1A1	0.0010473	0.384754	1		0.0005209	0.641859	1		0.0018619	0.236354	1
BTN2A1	9.49e-05	0.935676	1		0.0007594	0.487449	1		-0.0041564	0.0066918	1
BTN3A2	-0.0052627	4.1e-06	0.011983		-0.0045288	2.03e-05	0.0593007		-0.005547	0.0001917	0.559648
BTNL10	0.000513	0.675011	1		0.0006584	0.563181	1		1.52e-05	0.992367	1
C19ORF12	-0.0107265	3.82e-20	1.12e-16		-0.0127451	4.28e-32	1.25e-28		-0.005852	0.0001341	0.391699
C1GALT1C1	-0.0014305	0.241481	1		-0.0017947	0.114463	1		-0.0013245	0.4047	1
C1QA	0.0048733	1.85e-05	0.0540111		0.0068499	9.63e-11	2.81e-07		0.0001063	0.942853	1
C1QBP	-0.002519	0.0362203	1		-0.0023571	0.0350548	1		-0.0007986	0.610846	1
C1QL2	-0.0036813	0.0038642	1		-0.004169	0.0004341	1		-0.0056441	0.0006751	1
C1QTNF1	-0.0124178	3.2e-27	9.35e-24		-0.0121281	5.47e-30	1.6e-26		-0.0089367	2.7e-09	7.87e-06
C1QTNF5	-0.0048043	8.59e-05	0.250713		-0.0051706	5.51e-06	0.0160825		-0.0027253	0.0871151	1
C1QTNF6	-0.0003309	0.783599	1		-0.0005606	0.616804	1		0.0002454	0.875945	1
C1QTNF9	0.0081399	3.2e-11	9.34e-08		0.0069847	9.23e-10	2.69e-06		0.0065272	4.38e-05	0.127955
C1R	-0.0096095	3.06e-15	8.95e-12		-0.0098855	2.59e-18	7.56e-15		-0.0076302	1.58e-06	0.0046016
C1RL	-0.0142688	1.79e-29	5.24e-26		-0.0144243	1.51e-34	4.41e-31		-0.0089712	5.67e-08	0.0001655
C1S	-0.0135538	4.34e-28	1.27e-24		-0.013627	1.44e-32	4.2e-29		-0.0097302	1.49e-09	4.36e-06
C2	-0.0123376	7.85e-27	2.29e-23		-0.0127069	1.08e-32	3.15e-29		-0.0090989	1.45e-09	4.24e-06
C2CD2L	-0.0007985	0.477813	1		-0.000454	0.663322	1		0.0005062	0.732013	1
C2ORF69	-0.004812	8.01e-05	0.233776		-0.004407	0.000103	0.300671		-0.0023762	0.136542	1
C3	-0.0150231	1.27e-31	3.71e-28		-0.0168912	0	0		-0.0087564	1.76e-07	0.0005132
C4BPB	-0.0020578	0.0822735	1		-0.0016925	0.124528	1		-0.0012235	0.428754	1
C5	-0.0080483	3.64e-11	1.06e-07		-0.0085887	3.04e-14	8.89e-11		-0.0049059	0.0019845	1
C7	-0.0115172	9.25e-20	2.7e-16		-0.0087704	9.87e-14	2.88e-10		-0.0101926	7.17e-10	2.09e-06
C7ORF50	-0.0048147	6.54e-05	0.190984		-0.0051623	4.13e-06	0.0120626		-0.0034922	0.0262909	1
C8B	-0.010782	1.3e-18	3.78e-15		-0.0108681	1.33e-21	3.89e-18		-0.006234	9.53e-05	0.27821
C9	-0.0073245	3.7e-09	1.08e-05		-0.0032905	0.0043889	1		-0.0071479	1.04e-05	0.0303809
C9ORF40	-0.0004136	0.732486	1		-0.0011432	0.309464	1		0.0016451	0.297736	1
CA1	-0.0021092	0.068708	1		-0.0034174	0.0014948	1		0.0011606	0.443451	1
CA11	0.001359	0.228014	1		0.0014973	0.152565	1		0.0020738	0.160032	1
CA12	0.0035776	0.0015489	1		0.0045428	1.52e-05	0.0444846		0.002448	0.0979906	1
CA13	-0.0073444	4.97e-11	1.45e-07		-0.0077294	9.25e-14	2.7e-10		-0.0019168	0.190164	1
CA14	0.0197096	0	0		0.0172317	0	0		0.019974	1.42e-35	4.13e-32
CA2	-0.0049366	1.72e-05	0.0503099		-0.0056947	9.3e-08	0.0002715		-0.0009684	0.518468	1
CA3	-0.0005967	0.603276	1		4.55e-05	0.965941	1		-0.0012916	0.388635	1
CA4	0.0038133	0.0008847	1		0.0052869	6.95e-07	0.0020297		0.0023623	0.114496	1
CA5A	-0.0119565	1.76e-23	5.15e-20		-0.0137881	1.84e-35	5.37e-32		-0.008813	2e-08	5.85e-05
CA6	0.004249	0.0005936	1		0.0010011	0.38359	1		0.0075076	3.3e-06	0.0096228
CA7	0.002906	0.0166979	1		0.0033427	0.003078	1		0.0028668	0.0701616	1
CA8	-0.0001429	0.907042	1		0.0004203	0.711929	1		3.23e-05	0.983837	1
CA9	-0.0047167	4.02e-05	0.117509		-0.0026317	0.0138413	1		-0.0046357	0.0019777	1
CABP2	-0.0014327	0.240412	1		-0.002285	0.0441188	1		-0.0008197	0.607621	1
CACNA1C	0.0007621	0.533166	1		3.01e-05	0.97884	1		-0.0001915	0.904453	1
CACNA1H	0.006179	4.11e-07	0.0012012		0.0057854	3.54e-07	0.0010327		0.0046014	0.0037686	1
CACNB1	0.0006206	0.612031	1		0.0006876	0.545428	1		-0.0007817	0.624427	1
CACNB3	-0.0087558	4.25e-13	1.24e-09		-0.009701	5.78e-18	1.69e-14		-0.0033233	0.0351036	1
CACYBP	-0.0082056	1.84e-11	5.38e-08		-0.0088435	6.98e-15	2.04e-11		-0.0031644	0.0466997	1
CADPS	0.0010557	0.386291	1		0.0017033	0.13291	1		0.0014278	0.370408	1
CALB1	-0.0075758	5.47e-11	1.6e-07		-0.0060698	1.58e-08	4.6e-05		-0.0042562	0.0048921	1
CALB2	-0.0124619	2.6e-25	7.59e-22		-0.0137753	2.46e-35	7.19e-32		-0.0091351	6.55e-09	1.91e-05
CALCA	-0.0213083	0	0		-0.0204983	0	0		-0.0156069	9.19e-18	2.68e-14
CALCB	-0.0111569	4.12e-20	1.2e-16		-0.0089151	2.94e-15	8.6e-12		-0.0109929	3.85e-12	1.12e-08
CALCOCO1	-0.0024216	0.0299384	1		-0.0042447	4.35e-05	0.126944		0.0019617	0.177373	1
CALCOCO2	-0.0073032	2.34e-09	6.84e-06		-0.0077464	9.61e-12	2.81e-08		-0.0034955	0.0288458	1
CALY	-0.000249	0.838263	1		-0.0004529	0.690113	1		-0.0001429	0.928301	1
CAMKK1	-0.0042717	0.0001564	0.456745		-0.0059076	1.78e-08	5.19e-05		-0.0012716	0.390066	1
CAMLG	0.0016007	0.189666	1		0.0010384	0.360337	1		0.0037434	0.0190317	1
CAMSAP1	-0.0045403	0.000165	0.481693		-0.005125	4.79e-06	0.0139979		-0.0001668	0.915563	1
CANT1	-0.0062434	4.56e-08	0.0001332		-0.0060495	1.13e-08	3.3e-05		-0.0063025	2.49e-05	0.0725878
CAPG	-0.0052509	6.03e-06	0.0176193		-0.005335	7.99e-07	0.0023326		-0.0033902	0.0249323	1
CAPN3	0.0028176	0.0198037	1		0.0020192	0.0724118	1		0.0042714	0.0067651	1
CAPS	-0.0027236	0.0253927	1		-0.0001946	0.863605	1		-0.0017658	0.26612	1
CARHSP1	-0.0024538	0.0316191	1		-0.0024633	0.019898	1		0.0003645	0.807854	1
CASC3	-0.0089022	3.74e-13	1.09e-09		-0.0096667	2.21e-17	6.45e-14		-0.0038685	0.0158452	1
CASP1	-0.005362	2.1e-06	0.0061321		-0.0051059	1.09e-06	0.0031849		-0.0040178	0.0067815	1
CASP10	-0.0061791	4.42e-08	0.000129		-0.0067956	8.22e-11	2.4e-07		-0.0010264	0.48866	1
CASP2	-0.0056208	5.32e-07	0.0015524		-0.0069421	2.75e-11	8.02e-08		-0.0010088	0.489344	1
CASP3	-0.0062379	2.07e-08	6.04e-05		-0.0072029	3.18e-12	9.29e-09		-0.0010439	0.472264	1
CASP4	-0.0025732	0.0341188	1		-0.001954	0.0836843	1		-0.0009225	0.560197	1
CASP7	-0.0081993	9.78e-12	2.86e-08		-0.0085951	1.6e-14	4.67e-11		-0.0038932	0.0131247	1
CASP8	-0.0028723	0.0104957	1		-0.0034475	0.0009659	1		0.0013618	0.352059	1
CASP9	-0.0033676	0.0059346	1		-0.0035787	0.0016653	1		-0.0006962	0.66246	1
CASQ2	-0.0029404	0.0159289	1		-0.0022016	0.0525592	1		-0.002957	0.0625283	1
CAT	-0.0017624	0.15641	1		-0.0031273	0.0068822	1		0.0021472	0.185642	1
CBLIF	-0.0018516	0.103695	1		-0.0012485	0.237158	1		0.0006112	0.681653	1
CBLN1	0.0007377	0.54677	1		0.0005117	0.65289	1		-0.0023136	0.147476	1
CBLN4	0.0001847	0.869511	1		-0.0034027	0.0011436	1		0.0017919	0.221676	1
CBS	-0.0078141	3.71e-10	1.08e-06		-0.0100385	4.79e-18	1.4e-14		-0.0038228	0.01909	1
CBX2	0.001265	0.300087	1		0.0009878	0.384767	1		9.33e-05	0.95318	1
CC2D1A	-0.0078425	3.22e-12	9.39e-09		-0.00956	6.19e-20	1.81e-16		-0.0013694	0.353805	1
CCAR2	-0.0017083	0.155218	1		-0.0021222	0.0575288	1		-0.0007555	0.629575	1
CCDC134	-0.0051778	1.76e-05	0.0514706		-0.0054811	1.01e-06	0.002948		-0.0032907	0.0364772	1
CCDC28A	0.0015872	0.192671	1		0.0016078	0.155982	1		-0.0004722	0.767	1
CCDC50	-0.0014853	0.217045	1		-0.0008169	0.46529	1		0.0013142	0.402595	1
CCDC80	-0.0138583	1.2e-28	3.5e-25		-0.0135404	1.46e-31	4.27e-28		-0.0117105	7.91e-13	2.31e-09
CCER2	-0.0038728	0.0020004	1		-0.00576	7.7e-07	0.0022481		-0.0082776	4.37e-07	0.0012757
CCL11	-0.0101267	1.08e-17	3.16e-14		-0.0104515	1.99e-21	5.8e-18		-0.0080465	1.82e-07	0.0005314
CCL13	-0.0086071	3.01e-14	8.8e-11		-0.0093135	9.54e-19	2.79e-15		-0.003808	0.0099825	1
CCL14	-0.0073733	1.12e-10	3.28e-07		-0.0049066	3.73e-06	0.0108777		-0.0098745	3.83e-11	1.12e-07
CCL15	-0.0117458	2.21e-24	6.45e-21		-0.0106067	3.97e-23	1.16e-19		-0.0104881	3.17e-12	9.27e-09
CCL16	-0.0156791	7.65e-39	2.23e-35		-0.0163078	0	0		-0.0113609	4.73e-13	1.38e-09
CCL17	-0.0165907	0	0		-0.0146881	0	0		-0.0103155	4.19e-12	1.22e-08
CCL18	-0.0113501	8.27e-22	2.41e-18		-0.0099014	1.83e-19	5.34e-16		-0.0074475	1.5e-06	0.0043824
CCL19	-0.0109372	3.6e-22	1.05e-18		-0.0116193	2.04e-28	5.96e-25		-0.0087804	2.67e-09	7.79e-06
CCL2	-0.0011332	0.318355	1		-0.0029422	0.005312	1		0.0016921	0.256176	1
CCL20	-0.019467	0	0		-0.0187227	0	0		-0.0166826	1.11e-28	3.24e-25
CCL21	-0.0130906	2.67e-30	7.81e-27		-0.0124535	1.34e-31	3.91e-28		-0.0107145	7.21e-13	2.11e-09
CCL22	-0.0193789	0	0		-0.018891	0	0		-0.0134587	1.91e-18	5.59e-15
CCL23	0.0002234	0.847063	1		0.0009572	0.374423	1		0.0006048	0.688874	1
CCL24	-0.0016322	0.150454	1		-0.0024117	0.0223945	1		-0.0010284	0.487206	1
CCL25	-0.0078809	7.19e-12	2.1e-08		-0.0074393	3.49e-12	1.02e-08		-0.0093726	4.1e-10	1.2e-06
CCL26	-0.0078047	5.75e-12	1.68e-08		-0.0074186	1.96e-12	5.73e-09		-0.0037163	0.0117916	1
CCL27	-0.007803	3.18e-11	9.29e-08		-0.0065268	2.22e-09	6.48e-06		-0.0063706	3.5e-05	0.102185
CCL28	-0.0120439	3.52e-26	1.03e-22		-0.0095303	2.2e-19	6.42e-16		-0.0103773	2.49e-12	7.26e-09
CCL3	-0.0181986	0	0		-0.0163859	0	0		-0.0147882	3.04e-22	8.88e-19
CCL4	-0.0095353	4.9e-17	1.43e-13		-0.0089087	3.64e-17	1.06e-13		-0.0047719	0.0012889	1
CCL5	-0.013381	1.95e-32	5.68e-29		-0.0118514	1.06e-29	3.09e-26		-0.0100139	1.14e-11	3.33e-08
CCL7	-0.0219985	0	0		-0.0220158	0	0		-0.0140793	3.47e-20	1.01e-16
CCL8	-0.011312	1.18e-23	3.45e-20		-0.0106153	5.09e-24	1.49e-20		-0.0099179	1.63e-11	4.75e-08
CCN1	-0.0077403	2.11e-11	6.16e-08		-0.0080574	6.24e-14	1.82e-10		-0.0047558	0.0016697	1
CCN2	-0.0062023	3.69e-08	0.0001078		-0.0060119	9.75e-09	2.85e-05		-0.0033231	0.0237531	1
CCN3	-0.0037372	0.0023182	1		-0.0040181	0.0004219	1		-0.0032118	0.0448205	1
CCN4	-0.0130053	3.55e-30	1.04e-26		-0.0119804	1.36e-29	3.96e-26		-0.0082153	3.32e-08	9.69e-05
CCN5	-0.0050027	8.74e-05	0.255094		-0.0062826	1.12e-07	0.000327		0.0011759	0.479855	1
CCND2	0.000428	0.724193	1		0.0006645	0.555882	1		-0.000107	0.946052	1
CCNE1	0.0032465	0.0081045	1		0.0027748	0.0149565	1		4.16e-05	0.979226	1
CCS	-0.0016189	0.151909	1		-0.0021743	0.0384094	1		0.0010595	0.474708	1
CCT5	-0.0039544	0.0004499	1		-0.004918	2.59e-06	0.0075721		0.0004696	0.750292	1
CD101	-0.0073851	1.73e-09	5.06e-06		-0.0064402	1.62e-08	4.73e-05		-0.0061247	0.0001314	0.38369
CD109	-0.0032803	0.0040095	1		-0.0033891	0.0013677	1		-0.002164	0.145848	1
CD14	-0.0074836	2.2e-10	6.43e-07		-0.0036792	0.0007764	1		-0.0142085	3.02e-20	8.83e-17
CD160	0.0036855	0.0011792	1		0.0033987	0.0012977	1		-0.0004913	0.740228	1
CD163	-0.0153654	0	0		-0.0166103	0	0		-0.0114175	1.13e-13	3.29e-10
CD164	-0.0018338	0.104771	1		-0.0026127	0.0128163	1		0.0013713	0.352662	1
CD164L2	-0.0005064	0.677731	1		-0.0002704	0.811482	1		-0.0005697	0.720803	1
CD177	-0.0015333	0.172082	1		-0.0025328	0.0151348	1		0.0011384	0.437275	1
CD1C	0.0039398	0.0006319	1		0.0052628	9.26e-07	0.0027037		0.0003884	0.796375	1
CD2	-0.0017944	0.141984	1		-0.0023738	0.0369211	1		-0.0014373	0.366111	1
CD200	0.0070815	1.15e-09	3.34e-06		0.0080616	9.2e-14	2.69e-10		0.0018823	0.213903	1
CD200R1	-0.0032202	0.004432	1		-0.0043408	3.74e-05	0.109244		-0.0014161	0.336361	1
CD207	-0.0003475	0.762712	1		-0.0007499	0.483256	1		-0.0012762	0.396858	1
CD209	-0.0038029	0.0007553	1		-0.0043615	3.23e-05	0.0944051		-0.0005252	0.721841	1
CD22	-0.0022013	0.0606802	1		-0.0049965	4.68e-06	0.0136643		-0.0018974	0.215053	1
CD226	-0.0039599	0.0012319	1		-0.0035583	0.0017939	1		-0.0021771	0.172775	1
CD244	0.0041438	0.0002452	0.715972		0.0028477	0.0067342	1		0.0018867	0.200467	1
CD248	-0.0012997	0.308573	1		-0.0019573	0.0992883	1		6.49e-05	0.968957	1
CD27	-0.0085116	3.98e-13	1.16e-09		-0.0054726	5.35e-07	0.0015627		-0.0115405	4.86e-14	1.42e-10
CD274	-0.0083646	3.48e-13	1.02e-09		-0.006911	1.01e-10	2.94e-07		-0.006872	5.24e-06	0.0152925
CD276	0.0039549	0.0006825	1		0.0040522	0.0001842	0.537947		8.12e-05	0.957302	1
CD28	-0.0023255	0.0444501	1		-0.0041999	9.23e-05	0.269626		-0.000891	0.556432	1
CD2AP	-0.0058076	2.38e-07	0.0006945		-0.0076858	1.74e-13	5.08e-10		0.0002489	0.865716	1
CD300A	-0.0030005	0.0170222	1		-0.0017907	0.125779	1		-0.0049356	0.0025733	1
CD300C	-0.0016489	0.152686	1		-0.0004315	0.687533	1		-0.0034927	0.0203299	1
CD300E	-0.015244	5.2e-37	1.52e-33		-0.0132803	1.33e-32	3.88e-29		-0.0143763	4.55e-20	1.33e-16
CD300LF	-0.0003804	0.739517	1		0.0016663	0.117654	1		-0.0033485	0.0248645	1
CD300LG	0.003657	0.0023015	1		0.0053989	1.26e-06	0.003669		0.0006793	0.664398	1
CD302	-0.0075936	3.08e-10	8.98e-07		-0.004302	0.0001246	0.363902		-0.0103865	4.76e-11	1.39e-07
CD33	-0.0007963	0.477143	1		-0.0012153	0.243596	1		-0.0012332	0.399114	1
CD34	0.0094156	1.04e-16	3.04e-13		0.0088666	4.51e-17	1.32e-13		0.0068525	3.82e-06	0.0111535
CD36	-0.0077442	4.05e-10	1.18e-06		-0.0076553	3.01e-11	8.78e-08		-0.0047332	0.0033686	1
CD38	-0.0034902	0.0128445	1		-0.004028	0.0020023	1		-0.0005558	0.762126	1
CD3D	0.0029662	0.0152838	1		0.0027149	0.0169041	1		0.001914	0.230339	1
CD3E	-0.0005939	0.624559	1		-2.24e-05	0.984171	1		-0.002938	0.0633161	1
CD3G	0.000359	0.769167	1		0.0010542	0.35405	1		0.0002209	0.889772	1
CD4	-0.0088876	3.46e-14	1.01e-10		-0.0087469	1.05e-15	3.07e-12		-0.0092103	1.6e-09	4.66e-06
CD40	-0.0120545	1.88e-26	5.48e-23		-0.0115598	5.29e-28	1.55e-24		-0.0071478	1.32e-06	0.0038469
CD40LG	-0.0087271	4.67e-15	1.36e-11		-0.0088644	1.15e-17	3.34e-14		-0.0044964	0.0019714	1
CD46	-0.0046064	6.84e-05	0.199802		-0.0044657	3.15e-05	0.0918366		-0.0040221	0.0078356	1
CD48	-0.0011803	0.300557	1		-0.000917	0.387333	1		-0.0042731	0.0040512	1
CD5	-0.0058443	7.11e-07	0.0020752		-0.0051939	2.19e-06	0.0064067		-0.005854	0.0001404	0.410038
CD55	0.004557	0.0001054	0.307908		0.0051124	2.74e-06	0.0079875		0.003388	0.0273625	1
CD58	0.0113653	1.49e-23	4.36e-20		0.0113317	8.41e-27	2.46e-23		0.0062596	2.38e-05	0.0694797
CD59	-0.0004064	0.721634	1		-0.0006297	0.55266	1		8.25e-05	0.955939	1
CD5L	-0.0003606	0.767645	1		0.0002357	0.835409	1		-0.0009468	0.551979	1
CD6	-0.007083	7.61e-10	2.22e-06		-0.0063759	2.6e-09	7.59e-06		-0.0053796	0.0003377	0.986109
CD63	-0.0115286	2.24e-24	6.53e-21		-0.0118846	1.28e-29	3.74e-26		-0.0054298	0.0002575	0.751895
CD69	-0.0100131	3.13e-19	9.15e-16		-0.0102697	3.98e-23	1.16e-19		-0.005937	4.95e-05	0.144491
CD7	-0.0032443	0.0091901	1		-0.0017784	0.124714	1		-0.0062011	0.0001323	0.386216
CD70	-0.0022436	0.0563672	1		-0.0017208	0.115612	1		-0.0017404	0.255461	1
CD72	-0.0074265	9.95e-09	2.9e-05		-0.008016	2.9e-11	8.46e-08		-0.0073762	1.23e-05	0.036017
CD74	-0.0095097	3.12e-15	9.12e-12		-0.007467	2.85e-11	8.33e-08		-0.010479	2.84e-11	8.28e-08
CD79B	-0.0055107	2.31e-06	0.0067539		-0.0039401	0.0002817	0.822588		-0.00878	7.84e-09	2.29e-05
CD80	-0.0108518	1.41e-17	4.12e-14		-0.0103846	1.65e-18	4.8e-15		-0.0097387	4.53e-09	1.32e-05
CD82	0.000853	0.482225	1		0.0006526	0.563262	1		0.0032468	0.0402007	1
CD83	-0.0034584	0.0039677	1		-0.0035517	0.0014687	1		-0.0040091	0.0102987	1
CD84	-0.0014806	0.186278	1		-0.0015507	0.13668	1		0.0004933	0.735144	1
CD86	-0.0048628	7.15e-05	0.208874		-0.005511	1.29e-06	0.0037576		-0.0038389	0.0163548	1
CD8A	-0.0038705	0.0006233	1		-0.0035796	0.0006724	1		-0.0022324	0.130704	1
CD93	-0.0004063	0.719798	1		-0.0006336	0.546705	1		8.54e-05	0.954263	1
CD99	-0.0065979	5.37e-07	0.0015672		-0.005668	3.53e-06	0.0103207		-0.0044567	0.0094853	1
CD99L2	-0.0152962	0	0		-0.0137706	7.62e-37	2.22e-33		-0.0109502	7.55e-13	2.2e-09
CDA	-0.0031047	0.013115	1		-0.0064581	2.89e-08	8.44e-05		-0.0003028	0.853039	1
CDAN1	0.000723	0.547368	1		0.000531	0.634499	1		0.0007786	0.619035	1
CDC123	0.0014043	0.251208	1		0.0017193	0.131267	1		0.0028174	0.0768872	1
CDC25A	0.0009668	0.429505	1		0.0013305	0.242813	1		0.0010438	0.512178	1
CDC26	-0.0064538	8.93e-08	0.0002609		-0.0066157	3.72e-09	1.09e-05		-0.0019966	0.205091	1
CDC27	-0.0056697	5.05e-07	0.0014744		-0.0066704	1.92e-10	5.61e-07		8.25e-05	0.955468	1
CDC37	-0.007001	3.55e-10	1.04e-06		-0.007808	5.5e-14	1.61e-10		-0.0013513	0.353897	1
CDC42BPB	-0.0048449	6.14e-05	0.179357		-0.005823	2.2e-07	0.0006419		-7.42e-05	0.962509	1
CDCP1	-0.0133554	6.68e-25	1.95e-21		-0.0104712	3.59e-18	1.05e-14		-0.0117472	4.94e-12	1.44e-08
CDH1	-0.0058204	6.29e-07	0.0018364		-0.0050775	2.85e-06	0.0083177		-0.0055564	0.0002782	0.812375
CDH15	0.0002275	0.860648	1		-0.0035117	0.0035917	1		0.0052651	0.0018722	1
CDH17	-0.0035592	0.0018035	1		-0.0033756	0.0014302	1		-0.0034795	0.0198042	1
CDH2	0.0009708	0.382356	1		0.0004862	0.637445	1		0.001726	0.235544	1
CDH22	0.0004396	0.717263	1		0.001889	0.0943062	1		-0.0007088	0.65425	1
CDH23	0.0064213	1.09e-07	0.0003179		0.0066232	3.79e-09	1.11e-05		0.003289	0.0368761	1
CDH3	0.0059249	1.48e-07	0.0004314		0.0063368	1.53e-09	4.47e-06		0.0025464	0.0836956	1
CDH4	0.0012729	0.298041	1		0.0006467	0.569411	1		-0.0002823	0.859627	1
CDH5	0.0052098	3.76e-06	0.0109931		0.0046575	8.59e-06	0.0250717		0.0061458	2.91e-05	0.0850985
CDH6	0.0096303	3.03e-17	8.84e-14		0.0090491	1.24e-17	3.63e-14		0.0055277	0.0002149	0.627431
CDHR1	-0.006554	7.67e-09	2.24e-05		-0.0084479	9.32e-16	2.72e-12		-0.0033551	0.0243347	1
CDHR2	-0.0196493	0	0		-0.02531	0	0		-0.0047278	0.0111604	1
CDHR5	-0.0056082	1.79e-06	0.0052372		-0.008483	7.07e-15	2.06e-11		-0.0015658	0.308631	1
CDK1	-0.0006599	0.590614	1		-0.0008142	0.475849	1		0.0020965	0.189097	1
CDK5RAP3	-0.00228	0.0586278	1		-0.0023793	0.0338261	1		-0.0004573	0.771313	1
CDKL5	0.0016215	0.185281	1		0.0014724	0.19556	1		-0.0004175	0.793806	1
CDKN1A	-0.0072339	1.44e-10	4.21e-07		-0.0087463	7.25e-17	2.12e-13		-0.00122	0.408873	1
CDKN2D	-0.0052465	2.64e-06	0.0077185		-0.0060314	6.23e-09	1.82e-05		-0.0003625	0.80423	1
CDNF	0.0005692	0.620637	1		0.0013044	0.222298	1		0.0025733	0.0873637	1
CDON	-0.0096242	3.19e-17	9.31e-14		-0.0123839	1.74e-31	5.07e-28		-0.0060999	4.12e-05	0.120418
CDSN	-0.005285	2.62e-06	0.0076525		-0.0049285	2.48e-06	0.0072371		-0.005141	0.0004613	1
CEACAM1	0.0004569	0.689693	1		-0.0013856	0.19306	1		0.0013723	0.358465	1
CEACAM16	0.0051075	8.3e-05	0.24236		0.0027739	0.0214944	1		0.0068988	4.67e-05	0.13643
CEACAM18	-0.0030279	0.0125852	1		-0.0015654	0.165464	1		-0.0011071	0.484081	1
CEACAM19	-0.0099508	7.79e-16	2.27e-12		-0.0103459	2e-19	5.83e-16		-0.0107711	2.41e-11	7.03e-08
CEACAM20	-0.0054935	6.39e-06	0.0186615		-0.0046833	3.53e-05	0.103073		-0.0028718	0.0704092	1
CEACAM21	-0.004587	4.73e-05	0.138053		-0.0035247	0.0007759	1		-0.0053328	0.000279	0.814614
CEACAM3	-0.0001012	0.928389	1		-0.0001105	0.915805	1		0.0001681	0.909213	1
CEACAM5	-0.0132982	1.25e-28	3.66e-25		-0.0092934	6.81e-17	1.99e-13		-0.0105128	1.87e-11	5.47e-08
CEACAM6	-0.005811	5.99e-06	0.0174913		-0.0028693	0.0162924	1		-0.0027172	0.105101	1
CEACAM8	-0.0058557	4.61e-07	0.0013475		-0.0039284	0.0002636	0.769691		-0.0059978	8.19e-05	0.239082
CEBPA	-0.0006332	0.605289	1		-0.0002196	0.847178	1		-0.0029963	0.0605412	1
CEBPB	-0.0045984	5.46e-05	0.159306		-0.0066534	2.98e-10	8.69e-07		-0.0002923	0.844869	1
CELA2A	-0.0037305	0.0021841	1		-0.0035731	0.0016075	1		-0.0027785	0.0805691	1
CELA3A	-0.0046569	3.18e-05	0.092975		-0.0048654	2.88e-06	0.0084083		-0.00383	0.0087581	1
CELSR2	-0.007429	2.3e-09	6.72e-06		-0.0082621	9.02e-13	2.63e-09		-0.0053916	0.0008698	1
CEMIP2	-0.0054272	1.12e-05	0.0326327		-0.0061392	9.08e-08	0.0002652		-0.0017458	0.278191	1
CEND1	-0.0036551	0.0029033	1		-0.003567	0.0017671	1		-0.0040343	0.0117748	1
CENPF	-0.0006048	0.621772	1		-0.0020603	0.0707956	1		0.0026969	0.0915539	1
CENPJ	-0.000613	0.61369	1		-0.0011235	0.319903	1		-0.001723	0.27647	1
CEP112	-0.0005161	0.672527	1		-0.0015745	0.166004	1		0.0009347	0.556398	1
CEP152	0.000161	0.895354	1		0.0004946	0.664148	1		-0.0009404	0.55485	1
CEP164	-0.0009186	0.412691	1		-0.0004713	0.650596	1		0.0001765	0.904263	1
CEP170	-0.0053954	9.9e-06	0.0288981		-0.0055549	9.93e-07	0.0028992		-0.0008153	0.609574	1
CEP20	-0.0104049	4.96e-20	1.45e-16		-0.0102466	2.43e-22	7.11e-19		-0.0068306	4.36e-06	0.0127455
CEP290	-0.001396	0.249905	1		-0.000787	0.485597	1		-0.001325	0.402244	1
CEP350	-0.0009163	0.453798	1		-0.0009205	0.418866	1		-0.0007524	0.636465	1
CEP43	-0.007232	1.77e-10	5.18e-07		-0.0088491	3.78e-17	1.1e-13		-0.0023773	0.109766	1
CEP85	-0.0046388	4.18e-05	0.12209		-0.0057474	4.54e-08	0.0001327		-0.0003156	0.831402	1
CERT	-0.0075503	2.04e-11	5.96e-08		-0.0080974	8.59e-15	2.51e-11		-0.0027337	0.0645628	1
CES1	-0.012102	2.69e-24	7.86e-21		-0.0165088	0	0		-0.0050956	0.0010578	1
CES2	-0.0122567	4.61e-26	1.35e-22		-0.0132967	6.28e-35	1.83e-31		-0.0089808	3.47e-09	1.01e-05
CES3	-0.0027755	0.0147271	1		-0.0044695	2.37e-05	0.0692566		0.0015269	0.305336	1
CETN2	-0.0056672	4.94e-07	0.0014415		-0.0059293	1.36e-08	3.98e-05		-0.0011988	0.417845	1
CETN3	-0.0074705	6.38e-10	1.86e-06		-0.0071004	2.62e-10	7.66e-07		-0.0029724	0.059703	1
CFB	-0.0291103	0	0		-0.0294183	0	0		-0.0190152	5.84e-29	1.7e-25
CFC1	-0.0025689	0.0247577	1		-0.0039391	0.0002087	0.609527		-0.0008471	0.571771	1
CFD	-0.0103106	6.93e-16	2.02e-12		-0.0104591	1.29e-18	3.76e-15		-0.0073044	1.17e-05	0.034149
CFH	-0.0250718	0	0		-0.0291366	0	0		-0.0117676	9.92e-11	2.9e-07
CFHR2	-0.0007053	0.560977	1		-0.001741	0.122736	1		0.0004861	0.758521	1
CFHR4	-8.24e-07	0.999456	1		-0.0002305	0.837376	1		0.0007238	0.645818	1
CFHR5	-0.0135537	2.72e-28	7.95e-25		-0.0113573	2.94e-23	8.58e-20		-0.0094492	3.83e-09	1.12e-05
CFI	-0.0248877	0	0		-0.0273154	0	0		-0.0154435	4.59e-19	1.34e-15
CFP	-0.0048292	0.0001272	0.371421		-0.0098807	3.3e-17	9.64e-14		0.0003065	0.852104	1
CGA	-0.0075289	3.22e-06	0.0093946		-0.0070002	3.13e-06	0.0091373		-0.0082894	8.56e-05	0.250089
CGB3_CGB5_CGB8	-0.0039974	0.001727	1		-0.003788	0.001405	1		-0.0034239	0.0397611	1
CGN	-0.0001266	0.917238	1		-0.0001798	0.873999	1		0.0017708	0.266653	1
CGREF1	0.0009692	0.383145	1		0.0004849	0.638324	1		0.0017241	0.236065	1
CHAC2	-0.0052288	3.65e-06	0.0106441		-0.0059123	1.7e-08	4.97e-05		-0.0006258	0.672127	1
CHAD	0.0075416	1.7e-09	4.96e-06		0.007246	4.88e-10	1.42e-06		0.0031046	0.0568964	1
CHCHD10	-0.0124634	2.37e-20	6.91e-17		-0.0104752	6.47e-17	1.89e-13		-0.0105571	1.9e-09	5.54e-06
CHCHD6	-0.0072709	3.33e-09	9.72e-06		-0.0068183	2.41e-09	7.03e-06		-0.0069696	1.39e-05	0.0404567
CHEK2	0.0008432	0.451757	1		0.0002313	0.823801	1		0.0003372	0.818434	1
CHGA	-0.0049853	6.53e-05	0.190783		-0.0025734	0.0267473	1		-0.0036105	0.0268285	1
CHGB	-0.0060302	2.17e-07	0.0006324		-0.0038457	0.0003812	1		-0.0064638	2.12e-05	0.0617719
CHI3L1	-0.0191493	0	0		-0.0156104	0	0		-0.0186679	3.89e-31	1.13e-27
CHIT1	0.0006478	0.569229	1		0.0020731	0.049919	1		-0.0007124	0.631347	1
CHL1	-0.0014092	0.21517	1		-0.000492	0.640959	1		-0.0023441	0.114564	1
CHM	-0.005767	2.27e-06	0.0066237		-0.006498	1.02e-08	2.97e-05		-0.0021141	0.185249	1
CHMP1A	-0.0066786	2.13e-09	6.21e-06		-0.0073515	1.32e-12	3.85e-09		-0.0031551	0.0310834	1
CHMP6	-0.0081555	1.44e-11	4.21e-08		-0.0091911	2.77e-16	8.09e-13		-0.0026034	0.0988519	1
CHP1	0.0003738	0.759862	1		-0.0008192	0.471047	1		-0.0002351	0.882865	1
CHRDL1	-0.0064733	4.06e-07	0.0011859		-0.0061949	1.88e-07	0.000549		-0.0081529	9.94e-07	0.0029034
CHRDL2	-0.0087115	1.58e-14	4.62e-11		-0.0089347	2.13e-17	6.21e-14		-0.0044929	0.0024918	1
CHRM1	0.0032306	0.0080564	1		0.0029561	0.009145	1		0.0034588	0.030107	1
CIAPIN1	-0.0068676	8.71e-10	2.54e-06		-0.0080909	8.19e-15	2.39e-11		-0.0009116	0.533158	1
CILP	-0.0145382	3.37e-30	9.84e-27		-0.0142189	3.32e-33	9.7e-30		-0.0095443	9.7e-09	2.83e-05
CINP	8.37e-05	0.945012	1		8.81e-05	0.937828	1		7.64e-05	0.961491	1
CIRBP	-0.0094781	4.37e-15	1.28e-11		-0.0100158	4.74e-19	1.38e-15		-0.0036595	0.0204211	1
CIT	-0.004975	5.12e-05	0.149386		-0.0056269	8.42e-07	0.00246		-0.0019089	0.234864	1
CKAP4	-0.0039088	0.0008152	1		-0.0015456	0.154666	1		-0.0064228	2.44e-05	0.0711153
CKB	0.0139897	1.99e-24	5.82e-21		0.021101	0	0		-0.0014007	0.434592	1
CKMT1A_CKMT1B	-0.0093824	7.2e-17	2.1e-13		-0.0089603	1.07e-17	3.14e-14		-0.0085392	5.61e-09	1.64e-05
CLASP1	-0.0001779	0.884638	1		0.0006488	0.569744	1		-0.0028307	0.0760612	1
CLC	-0.0061245	5.85e-08	0.0001708		-0.0028347	0.0068557	1		-0.002991	0.0431333	1
CLEC10A	-0.0088467	7.55e-15	2.2e-11		-0.0048191	5.22e-06	0.0152546		-0.0088816	2.69e-09	7.85e-06
CLEC11A	-0.0067098	3.14e-09	9.17e-06		-0.0066001	3.54e-10	1.03e-06		-0.0025088	0.0900207	1
CLEC12A	-0.0039706	0.0012193	1		-0.0028126	0.0137547	1		-0.0040237	0.0118914	1
CLEC14A	0.006005	3.69e-07	0.0010772		0.0084987	9.15e-15	2.67e-11		0.0014537	0.345735	1
CLEC1A	-0.0052494	4.42e-06	0.0129089		-0.0037042	0.0004749	1		-0.0052951	0.0004125	1
CLEC1B	-0.0106578	1.44e-21	4.19e-18		-0.010512	4.84e-24	1.41e-20		-0.006406	1.14e-05	0.0331692
CLEC2L	0.001245	0.307811	1		0.0009832	0.386575	1		-0.000252	0.87461	1
CLEC3B	0.0078991	1.59e-10	4.63e-07		0.0052282	5.27e-06	0.015385		0.007043	1.22e-05	0.0356484
CLEC4A	-0.0020708	0.0755976	1		-0.0017532	0.105803	1		0.0014213	0.348799	1
CLEC4C	0.0029542	0.0090223	1		0.0020434	0.0521544	1		0.0010855	0.461047	1
CLEC4D	-0.0036826	0.001578	1		-0.0020967	0.0530854	1		-0.0075896	5.62e-07	0.0016401
CLEC4G	-0.006049	1.55e-07	0.0004525		-0.006508	1.29e-09	3.75e-06		-0.0029353	0.0504987	1
CLEC4M	-0.0028286	0.0205756	1		-0.0032275	0.0045042	1		0.0005229	0.742943	1
CLEC5A	-0.0071001	1.99e-09	5.82e-06		-0.0041352	0.0001679	0.490285		-0.0103863	2.04e-11	5.95e-08
CLEC6A	-0.0054933	2.02e-06	0.0058854		-0.0036164	0.000754	1		-0.0057466	0.0001468	0.428605
CLEC7A	-0.0004116	0.717095	1		0.0007869	0.456384	1		-0.0030913	0.0369039	1
CLGN	-0.0048981	6.64e-05	0.19397		-0.0037291	0.001096	1		-0.0050434	0.0016919	1
CLIC5	-0.0047652	9.68e-05	0.282718		-0.0042007	0.0002203	0.643236		-0.0045084	0.0048104	1
CLINT1	-0.0010753	0.379368	1		-0.0009754	0.391684	1		-0.0012155	0.445137	1
CLIP2	-0.0055525	7.54e-07	0.0022016		-0.006301	1.58e-09	4.61e-06		-0.0008262	0.571774	1
CLMP	-0.0105277	1.31e-16	3.83e-13		-0.0110229	1.31e-20	3.82e-17		-0.0085046	3.03e-07	0.0008846
CLNS1A	0.0003707	0.761034	1		6.83e-05	0.951939	1		0.0010891	0.494613	1
CLPP	-0.008575	2.15e-14	6.27e-11		-0.009798	5.82e-21	1.7e-17		-0.0043914	0.0028862	1
CLPS	-0.001049	0.355762	1		-0.0016242	0.123589	1		0.0001352	0.927346	1
CLSPN	-0.0002856	0.799392	1		-0.0007038	0.499335	1		0.0002094	0.887234	1
CLSTN1	0.0009712	0.388705	1		0.0003493	0.73796	1		0.0008501	0.565432	1
CLSTN2	-0.0069887	6.93e-10	2.02e-06		-0.0060923	7.42e-09	2.17e-05		-0.0066049	7.85e-06	0.0229224
CLSTN3	-0.0075685	7.19e-10	2.1e-06		-0.0081975	7e-13	2.04e-09		-0.0060884	0.000143	0.417631
CLTA	-0.0046285	3.82e-05	0.111678		-0.0047795	4.48e-06	0.0130924		-0.0010301	0.48457	1
CLU	-0.0022838	0.0582304	1		-0.003826	0.0006436	1		-0.0015102	0.336912	1
CLUL1	0.0031287	0.0091802	1		0.0037809	0.000695	1		0.0016765	0.28635	1
CMC1	-0.0084549	2.16e-12	6.3e-09		-0.0088858	2.09e-15	6.1e-12		-0.0025575	0.103842	1
CMIP	-0.0060263	5.99e-07	0.0017486		-0.007093	2.58e-10	7.54e-07		-0.0012917	0.412142	1
CNDP1	-0.0049245	1.85e-05	0.054033		-0.0062461	4.78e-09	1.4e-05		-0.0003959	0.792176	1
CNGB3	0.001863	0.127555	1		0.0013518	0.234163	1		0.0010644	0.504628	1
CNP	-0.00723	4.03e-09	1.18e-05		-0.0081006	1.35e-12	3.94e-09		-0.0014663	0.361501	1
CNPY2	-0.0031925	0.0043951	1		-0.0031292	0.0025945	1		-0.0014438	0.325808	1
CNPY4	-0.0086181	1.27e-14	3.7e-11		-0.0090741	2.43e-18	7.1e-15		-0.0038699	0.0081992	1
CNST	-0.0069046	6.02e-10	1.76e-06		-0.0080332	8.55e-15	2.5e-11		-0.0026201	0.0728852	1
CNTF	0.0017991	0.14122	1		0.0014013	0.217568	1		0.0004532	0.776373	1
CNTN1	0.0085462	2.14e-12	6.24e-09		0.004654	3.83e-05	0.111846		0.0071544	6.6e-06	0.0192794
CNTN2	-0.0083561	3.3e-13	9.63e-10		-0.0093057	2.93e-18	8.56e-15		-0.0048131	0.0013075	1
CNTN3	-0.0001017	0.935676	1		-0.006649	1.3e-08	3.81e-05		0.0089018	6.1e-08	0.000178
CNTN4	0.0034285	0.0030119	1		0.0031666	0.0031737	1		0.0039501	0.0088267	1
CNTN5	0.0079573	4.9e-11	1.43e-07		0.0058735	1.85e-07	0.0005404		0.0081824	2.36e-07	0.0006895
CNTNAP2	-0.0049565	1.66e-05	0.0485445		-0.0041914	9.05e-05	0.264131		-0.0013335	0.373492	1
CNTNAP4	0.002615	0.0325023	1		0.0023198	0.0414295	1		0.0010509	0.511259	1
COCH	-0.0092154	9.61e-14	2.81e-10		-0.0105087	6.88e-20	2.01e-16		-0.0032674	0.0432788	1
COL15A1	-0.0063719	6.85e-07	0.0020004		-0.0086241	4.99e-13	1.46e-09		-0.0024497	0.143857	1
COL18A1	-0.0131691	1.91e-27	5.57e-24		-0.0112942	1.28e-23	3.74e-20		-0.0136945	5.47e-18	1.6e-14
COL1A1	0.0042839	0.0001399	0.408434		0.003978	0.0001407	0.410844		0.0031075	0.0342661	1
COL24A1	0.0030877	0.0114549	1		0.0020497	0.0709836	1		0.0035058	0.027895	1
COL28A1	0.00045	0.71479	1		-0.0003311	0.77254	1		0.0026186	0.10399	1
COL2A1	0.0033475	0.0062315	1		0.0034252	0.0026146	1		0.0030973	0.0529127	1
COL3A1	-0.0036468	0.0026168	1		-0.0043155	0.0001291	0.376884		0.0003287	0.835469	1
COL4A1	0.0042338	0.0002607	0.761144		0.0079659	1.33e-13	3.88e-10		0.0024141	0.11182	1
COL4A4	-0.0003053	0.801548	1		-4.2e-05	0.970375	1		-0.0005642	0.721615	1
COL5A1	-0.0038882	0.0016391	1		-0.003958	0.0005687	1		-0.0038967	0.0153729	1
COL6A3	-0.0122242	1.15e-23	3.35e-20		-0.0114913	3.38e-24	9.86e-21		-0.008875	2.45e-08	7.15e-05
COL9A1	0.0113891	1.24e-23	3.63e-20		0.0124341	5.94e-32	1.73e-28		0.006174	3.03e-05	0.0885981
COL9A2	0.0017313	0.15399	1		0.0015378	0.173396	1		0.0012806	0.418666	1
COLEC12	-0.0101787	9.35e-16	2.73e-12		-0.0089604	2.95e-14	8.61e-11		-0.0104349	2.52e-10	7.35e-07
COMMD1	-0.0078171	1.65e-10	4.82e-07		-0.0082707	3.54e-13	1.04e-09		-0.002785	0.0817021	1
COMMD9	-0.0016467	0.172171	1		-0.0023161	0.0388152	1		0.0019597	0.212868	1
COMP	-0.000718	0.550894	1		-0.0031744	0.0044803	1		0.0038755	0.0137888	1
COMT	-0.0093017	2.44e-16	7.14e-13		-0.0100147	1.7e-21	4.96e-18		-0.0044303	0.0029353	1
COPB2	-0.0035434	0.003734	1		-0.0045774	5.72e-05	0.167163		-0.0032768	0.0393585	1
COPE	-0.0038984	0.0005202	1		-0.0031796	0.0022565	1		-0.0025874	0.0793711	1
COQ7	-0.0053546	1.41e-05	0.0410764		-0.0067144	4.72e-09	1.38e-05		-0.0044978	0.0052756	1
CORO1A	-0.0069982	6.86e-10	2e-06		-0.0069037	5.97e-11	1.74e-07		-0.0023637	0.109811	1
CORO6	0.0016392	0.182796	1		0.0025948	0.0232655	1		-0.0002024	0.899701	1
COX5B	-0.0121175	3.17e-27	9.27e-24		-0.0116361	5.85e-29	1.71e-25		-0.0078724	8.28e-08	0.0002417
COX6B1	-0.0066477	3.25e-08	9.5e-05		-0.0067027	2.09e-09	6.09e-06		-0.0026208	0.0952308	1
CPA1	-0.006673	3.15e-09	9.2e-06		-0.0073616	1.99e-12	5.8e-09		-0.0055772	0.0001486	0.433815
CPA2	-0.0036204	0.0012864	1		-0.0035195	0.0007756	1		-0.0055541	0.0001572	0.459155
CPA4	-0.0076355	6.48e-10	1.89e-06		-0.0088991	1.04e-14	3.05e-11		-0.0050486	0.0017078	1
CPB1	-0.0035821	0.0014889	1		-0.0046076	1.09e-05	0.0317322		-0.0025935	0.0779775	1
CPB2	-0.0073233	2.13e-09	6.21e-06		-0.0086482	2.8e-14	8.17e-11		-0.0042068	0.0083735	1
CPE	-0.0006964	0.536763	1		-3.93e-06	0.997015	1		0.0008091	0.581529	1
CPLX2	-0.0017519	0.152353	1		0.0001264	0.911671	1		-0.0020801	0.191593	1
CPM	-0.0147334	6.47e-32	1.89e-28		-0.0175086	0	0		-0.0068908	2.57e-05	0.0750462
CPOX	0.0012892	0.296371	1		0.0010409	0.364561	1		0.0006253	0.697495	1
CPPED1	-0.00887	5.16e-15	1.51e-11		-0.009971	3.29e-21	9.61e-18		-0.0027241	0.0658519	1
CPQ	-0.0031815	0.0089283	1		-0.0049737	1.1e-05	0.032067		-0.0028178	0.0767374	1
CPTP	3.32e-05	0.97833	1		0.0002038	0.857811	1		-0.0007805	0.623532	1
CPVL	-0.0003948	0.722405	1		-0.0006169	0.550968	1		7.85e-05	0.956816	1
CPXM1	-0.0086846	9.93e-15	2.9e-11		-0.0077226	1.39e-13	4.07e-10		-0.0052346	0.0003541	1
CPXM2	-0.0112264	7.93e-19	2.32e-15		-0.0103361	1.79e-18	5.24e-15		-0.0116404	2e-12	5.84e-09
CR1	-0.0047255	0.0001396	0.407679		-0.006263	5.65e-08	0.0001651		-0.0025893	0.109956	1
CR2	3.37e-06	0.997643	1		-0.0012966	0.221109	1		0.0012102	0.417385	1
CRACR2A	-0.003704	0.0010169	1		-0.0044427	2.18e-05	0.0637944		0.000117	0.936822	1
CRADD	-0.0069406	5.09e-10	1.49e-06		-0.007785	6.35e-14	1.85e-10		-0.0017522	0.23209	1
CREB3	0.0006115	0.617267	1		0.0006501	0.568171	1		-0.0005536	0.728084	1
CREBZF	0.0035881	0.0033982	1		0.0035984	0.0016007	1		0.0017929	0.260741	1
CREG1	-0.0109223	1.41e-20	4.12e-17		-0.0108451	3.21e-23	9.37e-20		-0.006465	2.5e-05	0.0730885
CRELD1	-0.0171751	0	0		-0.0172836	0	0		-0.0137614	2.55e-16	7.46e-13
CRELD2	-0.0079233	2.83e-12	8.27e-09		-0.007929	5.73e-14	1.67e-10		-0.0043337	0.003398	1
CRH	0.0077551	1.15e-11	3.36e-08		0.0077775	2.27e-13	6.64e-10		0.003374	0.0242265	1
CRHBP	-0.0128109	4.02e-27	1.18e-23		-0.0140253	6.49e-37	1.9e-33		-0.0097693	2.72e-10	7.93e-07
CRHR1	0.0004358	0.697505	1		0.0002383	0.818614	1		-0.0007582	0.605997	1
CRIM1	-0.0042869	0.0002473	0.721986		-0.0025929	0.0172009	1		-0.0035816	0.0188792	1
CRIP2	-0.0069712	1.29e-08	3.76e-05		-0.0083172	2.83e-13	8.27e-10		-0.0037443	0.0198896	1
CRISP2	0.0126456	1.49e-22	4.36e-19		0.0078655	6.67e-11	1.95e-07		0.0126308	7.42e-14	2.17e-10
CRISP3	0.0124045	7.79e-24	2.27e-20		0.0116192	3.79e-24	1.11e-20		0.0102055	2.1e-10	6.14e-07
CRKL	-0.0062599	2.19e-08	6.4e-05		-0.0072665	2.89e-12	8.45e-09		-0.0009436	0.518095	1
CRLF1	-0.0089287	1.81e-14	5.29e-11		-0.010188	5.49e-21	1.6e-17		-0.0024922	0.101099	1
CRNN	-0.0031964	0.007297	1		-0.003807	0.0006188	1		-0.0040767	0.0085536	1
CRTAC1	0.0063497	9.19e-08	0.0002685		0.0060642	3.97e-08	0.000116		0.0059553	0.0001235	0.36054
CRTAM	0.0020344	0.0749945	1		0.0028392	0.007506	1		-0.0005516	0.712883	1
CRTAP	0.0014428	0.238832	1		0.0009859	0.386856	1		7.9e-05	0.960661	1
CRX	2.72e-05	0.980611	1		-0.0005212	0.615928	1		0.0002647	0.857051	1
CRYBB1	-0.0078592	7.39e-11	2.16e-07		-0.0080899	5.73e-13	1.67e-09		-0.0026722	0.0900162	1
CRYBB2	-0.0069908	9.62e-09	2.81e-05		-0.0070717	4.29e-10	1.25e-06		-0.0060609	0.0001354	0.395397
CRYGD	-0.0037053	0.0021237	1		-0.0045318	5.3e-05	0.15466		0.0005311	0.735413	1
CRYM	-0.0049006	6.4e-05	0.186947		-0.0058698	2.57e-07	0.0007511		-0.0014123	0.377345	1
CRYZL1	-0.006192	3.94e-07	0.0011505		-0.0066581	4.49e-09	1.31e-05		-0.0014574	0.361329	1
CSDE1	-0.0004288	0.726204	1		-0.0020986	0.0656511	1		0.0004953	0.75597	1
CSF1	-0.0151523	2.63e-37	7.69e-34		-0.01302	4.68e-32	1.37e-28		-0.0140012	1.59e-19	4.64e-16
CSF1R	-0.0091394	3.3e-13	9.63e-10		-0.0110201	3.53e-21	1.03e-17		-0.006736	3.95e-05	0.115319
CSF2	-0.0023709	0.0551887	1		-0.0032333	0.0049757	1		-0.000473	0.768849	1
CSF2RA	-0.0030785	0.0061422	1		-0.0022377	0.0321175	1		-0.0045728	0.0019166	1
CSF2RB	-0.0055781	6.04e-06	0.0176262		-0.0057962	4.27e-07	0.0012472		-0.0056854	0.000401	1
CSF3	-0.0133814	3.23e-31	9.44e-28		-0.0145166	0	0		-0.0113666	4.68e-14	1.37e-10
CSF3R	-0.0054116	1.33e-05	0.0389305		-0.0046317	6.13e-05	0.179037		-0.0035828	0.0269436	1
CSH1	0.0009061	0.450576	1		0.0007236	0.516972	1		0.0025438	0.10464	1
CSNK1D	0.0004436	0.718165	1		-0.0007261	0.525253	1		-0.0002563	0.872851	1
CSNK2A1	-0.0035337	0.0034876	1		-0.0019514	0.082782	1		-0.0014751	0.350081	1
CSPG4	0.0015705	0.228252	1		0.001023	0.398915	1		0.0001009	0.952746	1
CSPG5	-0.0021507	0.0796415	1		-0.0025567	0.0249667	1		-0.0001807	0.910163	1
CSRP3	0.0031963	0.0100228	1		0.0047674	3.7e-05	0.107899		0.0032869	0.0418918	1
CST1	-0.0047861	0.000345	1		-0.0033437	0.0074894	1		-0.0041483	0.016637	1
CST3	-0.0166927	0	0		-0.0140803	5.04e-33	1.47e-29		-0.0167587	5.38e-24	1.57e-20
CST5	-0.0071958	6.01e-10	1.76e-06		-0.0074943	4.06e-12	1.19e-08		-0.005914	0.0001003	0.292755
CST6	0.0004049	0.721022	1		0.0006288	0.550961	1		-8.25e-05	0.955481	1
CST7	-0.0081109	6.94e-13	2.03e-09		-0.0064469	8.59e-10	2.51e-06		-0.0073105	6.96e-07	0.0020314
CSTB	-0.0105914	2.77e-19	8.1e-16		-0.0096738	1.08e-18	3.15e-15		-0.005299	0.0005917	1
CTAG1A_CTAG1B	-0.0019695	0.104868	1		-0.0013841	0.220475	1		-0.0041075	0.0095157	1
CTBS	-0.0046358	0.0002099	0.612935		-0.0056478	1.22e-06	0.0035576		-0.0022252	0.173565	1
CTF1	-0.0048105	1.84e-05	0.0537781		-0.0055275	1.1e-07	0.0003199		-0.0005912	0.68808	1
CTHRC1	-0.0177036	8.62e-38	2.52e-34		-0.0168339	0	0		-0.0093798	1.91e-07	0.0005586
CTLA4	-0.0003541	0.767847	1		0.0001225	0.912612	1		-7.24e-05	0.963147	1
CTNNA1	-0.0003552	0.771617	1		0.0002097	0.853699	1		-0.0019664	0.218202	1
CTRB1	-0.005591	6.52e-07	0.0019051		-0.0063845	9.47e-10	2.76e-06		-0.0027359	0.0621794	1
CTRC	-0.0021704	0.0552315	1		-0.002422	0.0215635	1		-0.0011946	0.417907	1
CTRL	-0.0037327	0.0024194	1		-0.0034205	0.0027916	1		-0.0033406	0.0372509	1
CTSB	0.0076825	9.31e-11	2.72e-07		0.0100579	6.61e-20	1.93e-16		0.0030355	0.0500185	1
CTSC	-0.0050066	1.37e-05	0.039935		-0.0051467	1.56e-06	0.0045407		-0.002288	0.12766	1
CTSD	-0.0187216	0	0		-0.0187253	0	0		-0.0147422	4.94e-19	1.44e-15
CTSE	0.003179	0.0094816	1		0.0027615	0.0154049	1		0.0032597	0.0410631	1
CTSF	-0.0003913	0.725399	1		-0.0006158	0.552388	1		8.44e-05	0.953729	1
CTSH	-0.0071766	3.88e-10	1.13e-06		-0.0073787	3.93e-12	1.15e-08		-0.0060448	5.73e-05	0.167354
CTSL	-0.0097986	6.17e-17	1.8e-13		-0.0089569	1.81e-16	5.3e-13		-0.0064987	2.3e-05	0.0670208
CTSO	-0.0092993	1.62e-15	4.73e-12		-0.0102485	3.62e-21	1.06e-17		-0.0073073	1.59e-06	0.0046434
CTSS	-0.0123677	8.34e-21	2.44e-17		-0.01241	6.82e-24	1.99e-20		-0.0092492	1.16e-07	0.0003386
CTSV	-0.0042743	0.0003318	0.968793		-0.006098	3.76e-08	0.0001097		8.3e-05	0.957392	1
CTSZ	-0.0073523	5.78e-10	1.69e-06		-0.006295	1.07e-08	3.13e-05		-0.0078334	4.39e-07	0.0012826
CUZD1	-0.0019776	0.104889	1		-0.0018072	0.111128	1		-0.0016769	0.293184	1
CWC15	-0.0045116	0.0002111	0.616555		-0.0053201	2.61e-06	0.0076078		-0.0045979	0.0038294	1
CX3CL1	0.0067362	3.2e-09	9.35e-06		0.0085525	5.98e-16	1.75e-12		0.000876	0.557303	1
CXADR	-0.0101326	3.86e-19	1.13e-15		-0.0104676	3.03e-23	8.83e-20		-0.0068133	3.89e-06	0.0113658
CXCL1	-0.0078952	2.5e-12	7.3e-09		-0.0084236	9.55e-16	2.79e-12		-0.0041927	0.0043576	1
CXCL10	-0.0128852	6.39e-28	1.87e-24		-0.0121619	1.1e-28	3.22e-25		-0.0108112	1.87e-12	5.46e-09
CXCL11	-0.0147001	1.7e-38	4.97e-35		-0.0135209	1.18e-37	3.44e-34		-0.0113797	1.5e-14	4.39e-11
CXCL12	-0.0008451	0.456251	1		0.0012142	0.248629	1		-0.0019787	0.182426	1
CXCL13	-0.0141194	7.59e-36	2.22e-32		-0.0133064	9.87e-37	2.88e-33		-0.0114103	1.07e-14	3.11e-11
CXCL14	0.0031296	0.0088681	1		0.003751	0.0007226	1		0.0046443	0.002993	1
CXCL16	-0.0214723	0	0		-0.0211396	0	0		-0.0143313	3.89e-21	1.13e-17
CXCL17	-0.0092871	1.09e-10	3.19e-07		-0.0057813	1.57e-05	0.0457454		-0.0055682	0.0030129	1
CXCL3	-0.006725	2.05e-09	5.99e-06		-0.006641	1.99e-10	5.82e-07		-0.0036722	0.0120868	1
CXCL5	-0.0135755	1.19e-32	3.46e-29		-0.0122679	4.94e-31	1.44e-27		-0.0097513	6.68e-11	1.95e-07
CXCL6	-0.0062327	2.83e-08	8.27e-05		-0.0073241	2.29e-12	6.69e-09		-0.0036784	0.0120049	1
CXCL8	-0.0080108	2.33e-12	6.81e-09		-0.0085899	6.7e-16	1.96e-12		-0.0063429	2.11e-05	0.0616963
CXCL9	-0.0145013	1.33e-33	3.87e-30		-0.0098596	1.1e-18	3.22e-15		-0.01528	1.7e-22	4.97e-19
CYB5A	-0.0008763	0.473848	1		-0.0013003	0.25358	1		0.0003702	0.816126	1
CYB5R2	-0.0073254	2.42e-09	7.05e-06		-0.0078645	5.84e-12	1.7e-08		-0.0016331	0.30865	1
CYP24A1	-0.0005724	0.638894	1		-0.000941	0.407337	1		0.00155	0.328924	1
CYTH3	0.0036288	0.0030544	1		0.0037163	0.0011184	1		0.0011413	0.474072	1
CYTL1	0.0008843	0.484666	1		0.0037524	0.0014352	1		0.0003387	0.837595	1
DAAM1	-0.0072024	3.75e-09	1.1e-05		-0.0077294	1.03e-11	3.02e-08		-0.0019937	0.210269	1
DAB2	-0.0072202	9.87e-11	2.88e-07		-0.0079173	2.49e-14	7.28e-11		-0.0021528	0.139339	1
DAG1	-0.0108938	5.76e-22	1.68e-18		-0.0117047	9.3e-29	2.71e-25		-0.0045846	0.0018889	1
DAND5	0.0008132	0.506002	1		0.0017291	0.128353	1		3.67e-05	0.981644	1
DAPK2	-0.0012674	0.301741	1		-0.0020969	0.0661541	1		-0.0007451	0.641275	1
DAPP1	-0.0053068	2.09e-06	0.0060972		-0.0056832	4.67e-08	0.0001365		-0.0012476	0.391543	1
DARS1	-0.0051792	3.52e-06	0.0102734		-0.0056245	6.03e-08	0.0001762		-0.0011661	0.426487	1
DBH	0.0064439	1.12e-07	0.0003272		0.006592	5.28e-09	1.54e-05		0.0055156	0.0005037	1
DBI	-0.0108406	9.51e-22	2.78e-18		-0.0113142	4.86e-27	1.42e-23		-0.0048035	0.0011487	1
DBN1	-0.0013022	0.287915	1		-0.0019732	0.0833433	1		2.78e-05	0.98612	1
DBNL	-0.0064425	8.28e-09	2.42e-05		-0.0073735	1.35e-12	3.94e-09		-0.0010196	0.484449	1
DCBLD2	0.0051027	2.76e-05	0.0805293		0.0075243	3.02e-11	8.82e-08		-0.0009745	0.539741	1
DCC	0.0032157	0.0091931	1		0.0019503	0.0894551	1		0.0004517	0.779704	1
DCDC2C	-0.0018047	0.140346	1		-0.0025377	0.0259181	1		0.0010121	0.52517	1
DCLRE1C	0.0023619	0.0534798	1		0.0015553	0.171945	1		0.0039874	0.012239	1
DCN	0.0068662	1.25e-08	3.66e-05		0.0055498	6.92e-07	0.0020217		0.0075749	1.67e-06	0.0048708
DCTD	-0.0067067	3.66e-08	0.0001068		-0.0074819	3.97e-11	1.16e-07		-0.0022752	0.15148	1
DCTN1	-0.0039586	0.0003979	1		-0.0053269	3.04e-07	0.0008884		-0.0002889	0.84293	1
DCTN2	0.0006898	0.536446	1		4.47e-05	0.965632	1		0.0037753	0.0097368	1
DCTN6	-0.004612	4.2e-05	0.122727		-0.0052568	4.69e-07	0.0013696		0.0009782	0.508133	1
DCTPP1	-0.0057999	4.5e-07	0.0013139		-0.0067317	2.79e-10	8.14e-07		-0.000818	0.586793	1
DCUN1D1	0.0043501	0.0003852	1		0.0029279	0.0101454	1		0.0027021	0.0910589	1
DCUN1D2	0.0018339	0.134279	1		0.0014276	0.210494	1		-0.0016381	0.304026	1
DCXR	-0.0103126	3.58e-17	1.04e-13		-0.0150868	0	0		-0.0014404	0.367596	1
DDA1	0.0014239	0.243137	1		0.0006341	0.57665	1		0.0012585	0.42799	1
DDAH1	-0.0098014	1.06e-17	3.09e-14		-0.0105079	4.82e-23	1.41e-19		-0.0051483	0.0005889	1
DDC	0.0038152	0.0007853	1		0.0035899	0.0006641	1		0.003473	0.0195794	1
DDHD2	-0.0060594	5.29e-07	0.0015441		-0.007547	1.83e-11	5.34e-08		-0.0007265	0.644984	1
DDI2	-0.0016552	0.179739	1		-0.0024687	0.0314679	1		0.0020232	0.207912	1
DDR1	-0.002597	0.0228537	1		-0.0015177	0.152879	1		-0.0038699	0.0093891	1
DDT	-0.0094606	2.4e-14	6.99e-11		-0.0107864	8.79e-21	2.57e-17		-0.0039951	0.0136866	1
DDX1	0.0038378	0.0014621	1		0.0035567	0.0015117	1		0.0040433	0.0102412	1
DDX25	0.003576	0.0033921	1		0.0039763	0.0004611	1		0.0021189	0.184491	1
DDX39A	0.0009058	0.458971	1		0.0008468	0.456614	1		-0.0025719	0.106587	1
DDX4	0.0032327	0.0082735	1		0.0024054	0.0346114	1		0.0006088	0.702738	1
DDX53	0.0004353	0.720947	1		0.0004581	0.686128	1		-0.0033259	0.0369379	1
DDX58	-0.0054901	1.19e-06	0.0034882		-0.0051614	8.76e-07	0.0025567		-0.0050308	0.0006773	1
DECR1	-0.0101415	1.55e-19	4.52e-16		-0.0110503	3.17e-26	9.26e-23		-0.0051938	0.0003769	1
DEFA1_DEFA1B	-0.0028948	0.0119328	1		-0.0019778	0.0642978	1		-0.0036976	0.0139049	1
DEFB103A_DEFB103B	-0.0029372	0.0171828	1		-0.0030819	0.0071876	1		-0.0008008	0.618304	1
DEFB104A_DEFB104B	0.0071798	2.03e-08	5.93e-05		0.0057418	1.39e-06	0.0040617		0.0054418	0.0011234	1
DEFB116	0.0023645	0.0533258	1		0.0031862	0.0050837	1		0.003536	0.0267875	1
DEFB118	2.06e-05	0.986559	1		0.0006125	0.589931	1		-0.0014028	0.379329	1
DEFB4A_DEFB4B	-0.0123753	1.02e-24	2.97e-21		-0.0113064	5.3e-24	1.55e-20		-0.0109013	4.5e-12	1.32e-08
DENND2B	0.0013299	0.275818	1		0.000563	0.620201	1		0.0033987	0.0323581	1
DENR	-0.0043803	0.0003479	1		-0.0057264	4.94e-07	0.0014416		0.000233	0.883926	1
DFFA	-0.0086644	7.55e-15	2.2e-11		-0.00931	2.61e-19	7.62e-16		-0.0032617	0.0248644	1
DGCR6	-0.003537	0.0038795	1		-0.0035728	0.0016973	1		-0.0024425	0.126459	1
DGKA	-0.0077383	2.97e-10	8.68e-07		-0.0089293	5.33e-15	1.56e-11		-0.0018994	0.235456	1
DGKZ	-0.0011914	0.288285	1		-0.0021229	0.0414278	1		0.0018196	0.215143	1
DHODH	0.0010872	0.373003	1		0.0003492	0.758575	1		0.0014966	0.346068	1
DHPS	-0.0050051	3.79e-05	0.110561		-0.0068593	1.23e-09	3.59e-06		-0.000884	0.576971	1
DHRS4L2	-0.0023463	0.0509998	1		-0.0027602	0.0135298	1		-0.001078	0.49144	1
DIABLO	-0.0083054	1e-13	2.92e-10		-0.0088682	1.13e-17	3.29e-14		-0.0033997	0.0200291	1
DIPK1C	0.0015061	0.216709	1		0.0019464	0.0861024	1		-0.0003838	0.809805	1
DIPK2B	0.0063985	6.92e-07	0.0020196		0.006074	4.07e-07	0.0011879		0.0043753	0.0091518	1
DKK1	-0.0084021	6.84e-14	2e-10		-0.0082061	3.74e-15	1.09e-11		-0.0042506	0.0037123	1
DKK3	0.0005267	0.656445	1		0.0007736	0.481843	1		0.0017274	0.263513	1
DKK4	-0.0031932	0.0055536	1		-0.0046635	1.32e-05	0.0384122		-0.002975	0.0484215	1
DKKL1	0.0062517	4.76e-08	0.000139		0.0064524	1.33e-09	3.87e-06		0.0036382	0.015216	1
DLG4	-0.003858	0.001358	1		-0.0049566	9.54e-06	0.0278648		-0.0006679	0.670438	1
DLGAP5	-0.000971	0.419413	1		-0.0004934	0.659035	1		-0.0003349	0.830996	1
DLK1	0.0009944	0.394093	1		-0.0021928	0.0430623	1		-0.0004167	0.784359	1
DLL1	-0.0022362	0.060442	1		-0.0001207	0.913288	1		-0.0071496	4.26e-06	0.0124301
DLL4	-0.0014449	0.236027	1		-0.0014671	0.195721	1		-0.0033142	0.0376343	1
DMD	-0.00325	0.0083096	1		-0.0032543	0.0044858	1		-0.0002106	0.895927	1
DMP1	0.0072925	1.24e-08	3.63e-05		0.008613	4.73e-13	1.38e-09		0.0032643	0.0513146	1
DNAJA1	0.0004755	0.697484	1		0.000561	0.622242	1		0.0004952	0.75575	1
DNAJA2	-0.0074729	2.68e-11	7.84e-08		-0.0086215	1.37e-16	4e-13		-0.0021852	0.135223	1
DNAJA4	-0.0015509	0.19942	1		-0.0020591	0.066864	1		0.0011982	0.446817	1
DNAJB1	-0.0089639	2.54e-15	7.42e-12		-0.0105181	1.65e-23	4.82e-20		-0.0018871	0.203392	1
DNAJB14	-0.0087265	5.03e-13	1.47e-09		-0.0089757	1.3e-15	3.8e-12		-0.0055969	0.0003885	1
DNAJB2	-0.0069976	1.36e-08	3.96e-05		-0.0078818	6.1e-12	1.78e-08		-0.0006922	0.666263	1
DNAJB6	-0.0068331	2.43e-08	7.1e-05		-0.0076104	2.5e-11	7.3e-08		-0.0021377	0.180891	1
DNAJB8	-0.0013945	0.213725	1		-0.0009967	0.337649	1		0.0004671	0.750706	1
DNAJC21	-0.0026337	0.0286105	1		-0.0040785	0.0002661	0.777037		0.0008297	0.596713	1
DNAJC6	-0.0065333	9.94e-08	0.0002903		-0.0075713	3.13e-11	9.14e-08		-0.0019046	0.234982	1
DNAJC9	-0.0070607	6.76e-09	1.97e-05		-0.0074625	4.35e-11	1.27e-07		-0.0008934	0.574357	1
DNER	-0.0104016	4.06e-19	1.19e-15		-0.0119903	1.8e-28	5.25e-25		-0.0040832	0.007106	1
DNLZ	0.0017938	0.1433	1		0.00122	0.28416	1		0.0024725	0.122095	1
DNM1	-0.0073725	1.02e-09	2.97e-06		-0.0073494	5.77e-11	1.69e-07		-0.0042736	0.0067139	1
DNM3	-0.0048707	6.34e-05	0.185151		-0.0044444	8.68e-05	0.253338		-0.0025563	0.107728	1
DNMBP	-0.005852	1.91e-07	0.0005583		-0.0064616	6.12e-10	1.79e-06		-0.0016226	0.27109	1
DNPEP	-0.0056847	3.15e-06	0.0091974		-0.0062709	3.19e-08	9.31e-05		-0.0021925	0.167844	1
DNPH1	-0.006397	1.43e-08	4.18e-05		-0.0073618	2.33e-12	6.8e-09		-0.0011242	0.445284	1
DOC2B	-0.0003895	0.749219	1		-0.0004094	0.717969	1		0.0010121	0.525426	1
DOCK9	0.0010215	0.404091	1		0.0009855	0.386405	1		-6.52e-05	0.967464	1
DOK1	-0.0058488	1.17e-06	0.0034027		-0.0068309	1.01e-09	2.95e-06		-0.0015676	0.31746	1
DOK2	-0.0076562	6.81e-12	1.99e-08		-0.0087189	3.8e-17	1.11e-13		-0.0014318	0.327209	1
DPEP1	-2.2e-05	0.984684	1		-0.0001783	0.867007	1		0.0010071	0.502998	1
DPEP2	-0.0046304	3.71e-05	0.108383		-0.0042752	4.17e-05	0.121716		-0.0041452	0.0047899	1
DPP10	-0.0137181	1.09e-32	3.18e-29		-0.0133738	9.42e-36	2.75e-32		-0.0083592	2.55e-08	7.43e-05
DPP4	0.0032559	0.0045462	1		-0.0008	0.45212	1		0.0041305	0.0058809	1
DPP6	-0.0023633	0.0468314	1		-0.0050086	5.79e-06	0.0169195		0.0027823	0.0737894	1
DPP7	-0.009801	5.41e-18	1.58e-14		-0.0084806	8.01e-16	2.34e-12		-0.0064498	1.4e-05	0.0407842
DPT	-0.0115527	6.39e-20	1.87e-16		-0.0127586	1.68e-27	4.91e-24		-0.0112264	1.03e-11	2.99e-08
DPY30	-0.0129035	5.53e-29	1.62e-25		-0.0139483	1.61e-38	4.71e-35		-0.0068038	6.35e-06	0.0185304
DRAXIN	-0.0053619	3.12e-06	0.0091191		-0.0054365	3.65e-07	0.0010648		-0.0060048	6.88e-05	0.200819
DRG2	-0.0053792	1.48e-06	0.0043101		-0.0065693	2.49e-10	7.27e-07		-0.0004272	0.770213	1
DSC2	-0.0005479	0.651311	1		0.0016239	0.149191	1		-0.0040859	0.0097917	1
DSCAM	0.0027116	0.0274732	1		0.0008405	0.462371	1		0.0026813	0.0947982	1
DSG2	0.0113303	2.48e-21	7.24e-18		0.0127654	1.2e-30	3.51e-27		0.005699	0.0002596	0.757894
DSG3	-0.0016661	0.159419	1		-0.0033108	0.0026688	1		-0.0001135	0.941446	1
DSG4	3.83e-05	0.973346	1		0.0003884	0.715781	1		-0.0005003	0.738631	1
DTD1	-0.0055961	4.32e-06	0.0126263		-0.0062807	2.94e-08	8.58e-05		-0.0012244	0.440104	1
DTNB	-0.0075163	4.65e-09	1.36e-05		-0.0068252	1.04e-08	3.05e-05		-0.0033411	0.0458281	1
DTX2	0.0022047	0.0717124	1		0.0012997	0.253705	1		0.0012299	0.44247	1
DTX3	-0.0007238	0.553338	1		-0.0004618	0.684034	1		-0.0010224	0.522388	1
DTYMK	-0.0099189	4.14e-16	1.21e-12		-0.0113453	1.46e-23	4.26e-20		-0.003588	0.0243002	1
DUOX2	0.0016628	0.138174	1		0.0017116	0.0996701	1		0.0029435	0.0452775	1
DUSP13	0.0034063	0.0054336	1		0.0014334	0.208145	1		0.0051415	0.0012937	1
DUSP29	0.0010451	0.39623	1		0.0027847	0.015084	1		-0.0008343	0.604623	1
DUSP3	-0.0006303	0.575078	1		-0.0010802	0.299796	1		0.0011703	0.427801	1
DUT	-0.0119143	3.62e-22	1.06e-18		-0.0120113	8.53e-26	2.49e-22		-0.0067034	3.05e-05	0.0891553
DXO	-0.0073853	9.15e-10	2.67e-06		-0.0080187	8.52e-13	2.49e-09		-0.0022359	0.154966	1
DYNC1H1	-0.0006312	0.600256	1		-0.0009666	0.3879	1		-0.0013995	0.373022	1
DYNLT1	-0.0073719	2e-09	5.83e-06		-0.0076236	2.57e-11	7.52e-08		-0.0035032	0.029369	1
DYNLT3	-0.0046693	0.0001099	0.320809		-0.0054449	1.22e-06	0.0035521		-0.0005827	0.711367	1
EBAG9	-0.0073579	4.72e-11	1.38e-07		-0.0085082	2.68e-16	7.82e-13		-0.0022062	0.132708	1
EBI3_IL27	0.0007807	0.502667	1		0.0022297	0.0396866	1		-0.0031831	0.0360585	1
ECE1	-0.0032939	0.0035682	1		-0.0038416	0.0002448	0.714679		-0.0038341	0.0097721	1
ECHDC3	-0.0125301	2.87e-24	8.38e-21		-0.0146795	1.52e-37	4.43e-34		-0.0077573	1.47e-06	0.0042799
ECHS1	-0.016056	2.26e-38	6.6e-35		-0.0166821	0	0		-0.0101224	4.4e-10	1.28e-06
ECI2	-0.0070786	7.19e-09	2.1e-05		-0.0067089	3.85e-09	1.12e-05		-0.0052616	0.0009528	1
ECM1	0.000194	0.873822	1		-0.0015929	0.160939	1		0.0031492	0.0480068	1
ECSCR	0.0011027	0.367487	1		0.000742	0.514125	1		0.0001395	0.930367	1
EDA2R	-0.0133829	2.16e-21	6.3e-18		-0.0086318	4.72e-11	1.38e-07		-0.0122504	2.69e-11	7.86e-08
EDAR	-0.0008227	0.462348	1		-0.0013797	0.185104	1		0.0016093	0.269362	1
EDDM3B	0.0022506	0.263893	1		0.0011691	0.532341	1		0.0017936	0.494823	1
EDEM2	-0.0003781	0.756618	1		-0.0005745	0.612968	1		0.0009378	0.55476	1
EDF1	-0.0050646	2.59e-05	0.0756976		-0.0048253	1.63e-05	0.0476391		-0.0019516	0.21421	1
EDIL3	0.0051728	1.69e-05	0.049289		0.0052414	2.56e-06	0.0074627		0.0039462	0.0122934	1
EDN1	-0.0120311	7.67e-21	2.24e-17		-0.0089377	7.51e-14	2.19e-10		-0.0125062	9.86e-14	2.88e-10
EDNRB	0.0016856	0.168341	1		0.0023052	0.0427703	1		0.0003723	0.815349	1
EEF1D	-0.0086872	7.1e-13	2.07e-09		-0.0096588	9.5e-18	2.77e-14		-0.0031089	0.0492562	1
EFCAB14	-0.0038989	0.0019205	1		-0.0025428	0.0295193	1		-0.0057647	0.0004428	1
EFCAB2	-0.0060194	7.29e-07	0.0021272		-0.0057674	3.35e-07	0.0009772		-0.0031388	0.0476076	1
EFEMP1	-0.0125192	2.31e-23	6.76e-20		-0.0099483	1.5e-17	4.38e-14		-0.0122888	7.46e-14	2.18e-10
EFHD1	0.0010538	0.406811	1		0.0026518	0.0247778	1		-0.0011247	0.497511	1
EFNA1	-0.008017	7.46e-12	2.18e-08		-0.0049526	5.27e-06	0.0153989		-0.0108238	1.38e-12	4.04e-09
EFNA4	-0.0131346	1.3e-27	3.8e-24		-0.0115439	7.35e-25	2.15e-21		-0.0137271	4.31e-18	1.26e-14
EFNB2	0.0052195	1.92e-05	0.0559847		0.0055852	8.77e-07	0.0025614		0.0017755	0.266408	1
EGF	-0.0086287	1.24e-14	3.63e-11		-0.0090355	3.99e-18	1.16e-14		-0.0037434	0.0103082	1
EGFL7	-0.0073792	2.62e-10	7.64e-07		-0.0069675	1.3e-10	3.79e-07		-0.0063516	3.27e-05	0.0953712
EGFLAM	-0.0020478	0.0930416	1		-0.0017032	0.132886	1		0.0029673	0.0623157	1
EGFR	0.0008527	0.458654	1		-0.0023016	0.0312923	1		0.0066586	9.2e-06	0.0268594
EGLN1	-0.0111628	2.61e-22	7.63e-19		-0.0114804	6.37e-27	1.86e-23		-0.0053619	0.0003396	0.991709
EHBP1	-0.0004228	0.724547	1		-0.0006565	0.556431	1		0.0001051	0.946505	1
EHD3	-0.0070025	9.57e-09	2.79e-05		-0.0076396	1.67e-11	4.86e-08		-0.0030575	0.0553898	1
EIF1AX	-0.0005387	0.654853	1		-0.0006173	0.581627	1		-0.0013989	0.373044	1
EIF2AK2	-0.0080079	3.78e-11	1.1e-07		-0.0088321	4.29e-15	1.25e-11		-0.0040481	0.0105117	1
EIF2AK3	-0.0021549	0.0778373	1		-0.0027465	0.0157726	1		0.0013754	0.387151	1
EIF2S2	-0.003258	0.0075946	1		-0.0043063	0.0001479	0.43177		-0.0020183	0.205948	1
EIF4B	-0.0063622	1.39e-08	4.05e-05		-0.0076588	1.96e-13	5.72e-10		-0.0019784	0.178601	1
EIF4E	-0.0075717	6.79e-10	1.98e-06		-0.0081465	9.32e-13	2.72e-09		-0.0021812	0.172617	1
EIF4EBP1	-0.0089478	2.37e-15	6.91e-12		-0.0093678	4.12e-19	1.2e-15		-0.0037972	0.010284	1
EIF4G1	-0.0084218	5.26e-14	1.53e-10		-0.0092746	4.99e-19	1.46e-15		-0.0020095	0.168696	1
EIF4G3	-0.0032308	0.0073288	1		-0.0045478	4.92e-05	0.143524		0.0002953	0.851001	1
EIF5	-0.0037663	0.0020322	1		-0.0032399	0.0043601	1		-0.0016496	0.299139	1
EIF5A	0.0002656	0.812773	1		0.0005191	0.617847	1		0.002273	0.12131	1
ELAC1	-0.0070986	3.86e-09	1.13e-05		-0.0075051	2.12e-11	6.19e-08		-0.0023925	0.128287	1
ELAVL4	-0.0021316	0.0815783	1		-0.002404	0.0345665	1		-0.0026535	0.0966104	1
ELN	0.0008995	0.58251	1		0.004025	0.008187	1		-0.0026686	0.211674	1
ELOA	-0.0096678	2.31e-17	6.75e-14		-0.0101882	6.98e-22	2.04e-18		-0.0050706	0.0006854	1
ELOB	-0.0049567	5.02e-05	0.146638		-0.0054924	1.39e-06	0.00407		-0.0018675	0.240562	1
ENAH	-0.0089168	5.52e-15	1.61e-11		-0.0096437	8.23e-20	2.4e-16		-0.004559	0.0022683	1
ENDOU	0.0043651	0.0019443	1		0.0010871	0.406679	1		0.0044926	0.0147396	1
ENG	0.0019701	0.0824582	1		0.0040497	0.0001215	0.354776		0.0009778	0.508912	1
ENO1	-0.0064404	8.98e-09	2.62e-05		-0.0069263	3.02e-11	8.82e-08		-0.0018975	0.194575	1
ENO2	-0.0074369	2.49e-11	7.26e-08		-0.0082649	1.55e-15	4.54e-12		-0.0016312	0.262334	1
ENO3	-0.0076549	6.1e-09	1.78e-05		-0.0105524	6.61e-18	1.93e-14		-0.0019916	0.247428	1
ENOPH1	0.0003237	0.78824	1		-0.0001658	0.882308	1		-0.0008622	0.583298	1
ENOX2	-0.0020751	0.0892284	1		-0.0035833	0.00162	1		-0.0003076	0.846539	1
ENPEP	0.0004172	0.732346	1		-0.0001158	0.918777	1		-0.00223	0.160164	1
ENPP2	-0.007798	1.44e-08	4.2e-05		-0.0080024	3.78e-10	1.1e-06		-0.002251	0.209939	1
ENPP5	0.0070636	2.38e-09	6.96e-06		0.0050016	5.57e-06	0.0162635		0.0090712	4.15e-09	1.21e-05
ENPP6	0.0052184	5.85e-05	0.170687		0.0049513	4.12e-05	0.120341		0.0002963	0.861472	1
ENPP7	-0.0126973	1.25e-27	3.65e-24		-0.01362	4.11e-36	1.2e-32		-0.0074267	1.08e-06	0.0031521
ENSA	-0.0047705	7.49e-05	0.218653		-0.004455	6.92e-05	0.201994		-0.0020185	0.198945	1
ENTPD2	-0.0045678	5.6e-05	0.163586		-0.006034	9.86e-09	2.88e-05		-0.0016354	0.270624	1
ENTPD5	-0.0005508	0.629104	1		2.14e-05	0.983831	1		-0.0003717	0.803611	1
ENTPD6	-0.0045163	6.49e-05	0.189411		-0.0045176	1.63e-05	0.0475142		-0.0035863	0.0155484	1
ENTR1	-0.0081641	4.47e-11	1.3e-07		-0.0106627	2.14e-20	6.24e-17		-0.001947	0.229685	1
EP300	-0.0028867	0.0182651	1		-0.0026918	0.0179484	1		-0.0023841	0.134668	1
EPB41L5	0.0002074	0.864918	1		-9.06e-05	0.936326	1		0.0019499	0.221373	1
EPCAM	-0.0066714	5.12e-09	1.5e-05		-0.0056405	1.11e-07	0.0003241		-0.0024447	0.100614	1
EPGN	7.29e-05	0.951738	1		0.0003489	0.755341	1		-0.0014613	0.352425	1
EPHA1	-0.0014739	0.240285	1		-0.0022346	0.0556961	1		0.0004279	0.793931	1
EPHA10	-0.0019899	0.076566	1		-0.0008267	0.427221	1		-0.0012778	0.386328	1
EPHA2	-0.0036325	0.003047	1		-0.000858	0.451525	1		-0.0066162	3.62e-05	0.105738
EPHA4	0.0024306	0.049657	1		0.0002831	0.805853	1		0.0012056	0.454638	1
EPHB4	0.0052045	4.92e-06	0.0143643		0.0074582	1.81e-12	5.28e-09		-0.0014991	0.313357	1
EPHB6	0.0001494	0.895451	1		0.0009263	0.380708	1		-0.0036899	0.0134036	1
EPHX2	-0.0045898	4.39e-05	0.128182		-0.0050698	1.12e-06	0.003268		-0.0024652	0.0941528	1
EPN1	0.0002469	0.838829	1		7.2e-06	0.994912	1		-9.81e-06	0.995056	1
EPO	-0.0105374	2.13e-20	6.21e-17		-0.010452	5.54e-23	1.62e-19		-0.0082858	2.28e-08	6.65e-05
EPPK1	-0.0068053	3.08e-08	8.99e-05		-0.0073574	1.21e-10	3.54e-07		-0.0048539	0.0025288	1
EPS8L2	-0.0075758	7.95e-11	2.32e-07		-0.0094389	3.19e-18	9.32e-15		-0.0038193	0.0120172	1
ERBB2	-0.014959	4.62e-35	1.35e-31		-0.0187552	0	0		-0.0043792	0.00565	1
ERBB3	-0.0094462	2.14e-15	6.25e-12		-0.010812	1.69e-22	4.92e-19		-0.0073015	2.62e-06	0.0076599
ERBB4	0.0022278	0.0542833	1		0.001819	0.0912349	1		0.0051461	0.000661	1
ERBIN	-0.0065463	4.93e-09	1.44e-05		-0.0076953	1.36e-13	3.96e-10		-0.0010569	0.47066	1
ERC2	-0.0019744	0.105314	1		-0.0016105	0.155534	1		-0.0009408	0.555202	1
ERCC1	0.0018555	0.129308	1		0.0028839	0.0113195	1		0.0002598	0.870371	1
EREG	-0.0119124	2.04e-26	5.94e-23		-0.0127864	1.13e-34	3.3e-31		-0.0059241	5.68e-05	0.165798
ERI1	-0.0067458	3.9e-08	0.0001139		-0.0062525	4.35e-08	0.0001271		-0.0038961	0.0149403	1
ERMAP	-0.0047105	0.0002292	0.669343		-0.0047855	5.69e-05	0.166224		-0.0004421	0.790747	1
ERN1	-0.0132318	4.67e-27	1.36e-23		-0.013001	4.74e-30	1.38e-26		-0.0085879	8.49e-08	0.0002478
ERP29	-0.0083557	7.34e-12	2.14e-08		-0.0089065	4.11e-15	1.2e-11		-0.0027184	0.0870695	1
ERP44	-0.0088018	9.62e-15	2.81e-11		-0.0099598	4.08e-21	1.19e-17		-0.002718	0.0678113	1
ERVV_1	0.0006368	0.601946	1		0.0006376	0.574836	1		-0.000705	0.657281	1
ESAM	0.0012435	0.27727	1		0.0018448	0.0826941	1		0.0004491	0.763643	1
ESM1	0.0104919	4.29e-19	1.25e-15		0.0110085	7.56e-24	2.21e-20		0.0058147	0.0001451	0.423652
ESPL1	0.0003026	0.804697	1		0.0015011	0.187664	1		-0.0002487	0.875916	1
ESR1	0.0028538	0.0198814	1		0.0027391	0.0162454	1		0.000617	0.69922	1
ESYT2	-0.0082737	9.32e-12	2.72e-08		-0.0087744	7.43e-15	2.17e-11		-0.0039807	0.0118722	1
EVI2B	0.0005076	0.678303	1		0.0010588	0.352633	1		0.0008179	0.607533	1
EVI5	-0.0066393	6.4e-08	0.0001869		-0.0074129	8.43e-11	2.46e-07		-0.0024547	0.125036	1
EVPL	0.0006644	0.583952	1		0.0003684	0.744059	1		0.0006236	0.693386	1
EXOSC10	0.0006555	0.591246	1		0.0005739	0.613531	1		0.000137	0.9313	1
EXTL1	0.0033997	0.0056172	1		0.0019238	0.0923486	1		0.0044626	0.0052206	1
EZR	-0.0156633	0	0		-0.0166301	0	0		-0.0091449	1.31e-09	3.82e-06
F10	-0.0087494	1.2e-12	3.49e-09		-0.0091697	1.14e-15	3.34e-12		-0.0071128	9.66e-06	0.0282133
F11	-0.0037006	0.0028087	1		-0.0055749	1.28e-06	0.0037491		0.0003746	0.816554	1
F11R	-0.0109302	4.22e-22	1.23e-18		-0.0110716	5.4e-26	1.58e-22		-0.005978	5.16e-05	0.150598
F12	-0.0012351	0.310056	1		-0.0030999	0.0061409	1		0.0014726	0.353386	1
F13B	0.0010391	0.388173	1		0.0005196	0.642462	1		0.001853	0.238096	1
F2	0.0004137	0.730065	1		0.0006482	0.560967	1		-0.0001085	0.94469	1
F2R	-0.0082064	2.43e-13	7.09e-10		-0.0084739	4.37e-16	1.28e-12		-0.0048382	0.0009341	1
F3	-0.0024999	0.0354969	1		-0.0004251	0.700919	1		-0.0024451	0.114641	1
F7	-0.0082888	1.22e-12	3.57e-09		-0.0090106	8.54e-17	2.49e-13		-0.0071459	2.78e-06	0.0081261
F9	-0.0185314	0	0		-0.0184681	0	0		-0.0120101	2.91e-14	8.51e-11
FABP1	-0.0149503	1.27e-34	3.72e-31		-0.0143782	7.24e-37	2.11e-33		-0.0121848	1.62e-14	4.72e-11
FABP2	-0.0050148	9.18e-06	0.0267998		-0.003175	0.0024863	1		-0.0061797	2.99e-05	0.087194
FABP3	-0.0040609	0.0028311	1		-0.0012503	0.323136	1		-0.0038018	0.0323233	1
FABP4	-0.028573	0	0		-0.0300484	0	0		-0.0184545	2.23e-24	6.52e-21
FABP5	-0.0109295	7.16e-22	2.09e-18		-0.0124606	5.06e-32	1.48e-28		-0.0036175	0.014916	1
FABP6	0.0014159	0.21054	1		0.0020897	0.0461872	1		-0.0008977	0.544905	1
FABP9	-0.0010039	0.378439	1		-0.000765	0.470525	1		-0.0025233	0.0889682	1
FADD	-0.0078743	1.55e-12	4.52e-09		-0.0081095	4.36e-15	1.27e-11		-0.0032336	0.0266467	1
FAM13A	-0.0076032	3.34e-10	9.76e-07		-0.0083805	9.35e-14	2.73e-10		-0.0025857	0.101885	1
FAM171A2	0.0013805	0.251176	1		0.0008985	0.421868	1		0.0025731	0.101208	1
FAM171B	-0.0005782	0.632369	1		-0.0011001	0.327441	1		-0.001443	0.360015	1
FAM172A	-0.0047239	0.0001082	0.316021		-0.0056584	6.13e-07	0.0017907		-0.000906	0.570172	1
FAM20A	-0.0211171	0	0		-0.0216081	0	0		-0.0128436	5.31e-14	1.55e-10
FAM3B	-9.05e-06	0.993676	1		0.0022688	0.0324738	1		-0.0041191	0.0058384	1
FAM3C	-0.0076782	8.76e-11	2.56e-07		-0.0053057	1.37e-06	0.0040145		-0.0098499	2.08e-10	6.08e-07
FAM3D	-0.0025084	0.0398976	1		-0.0019682	0.0828308	1		-0.0068893	1.54e-05	0.0449559
FAP	-0.0024773	0.0300895	1		-0.0062936	2.98e-09	8.7e-06		0.0046689	0.0017328	1
FARSA	-0.0056233	4.22e-06	0.012321		-0.0065326	9.14e-09	2.67e-05		-0.0018899	0.237299	1
FAS	-0.002313	0.0541602	1		-0.0039393	0.0004147	1		0.0004456	0.776194	1
FASLG	0.0067129	1.93e-08	5.63e-05		0.0067474	1.26e-09	3.68e-06		0.0018027	0.247403	1
FBLN2	-0.0032514	0.010589	1		-0.0037176	0.0016814	1		-0.0034843	0.0359612	1
FBN2	0.0006733	0.580821	1		-0.0005869	0.604805	1		0.0008657	0.587293	1
FBP1	-0.0087243	4.13e-14	1.21e-10		-0.0111994	1.41e-25	4.13e-22		-0.003577	0.0180085	1
FCAMR	-0.0161936	4.73e-34	1.38e-30		-0.018145	0	0		-0.0084048	1.36e-06	0.0039698
FCAR	-0.0074919	4.24e-11	1.24e-07		-0.0076068	6.01e-13	1.75e-09		-0.0047318	0.0013757	1
FCER1A	0.0015346	0.203537	1		0.0002947	0.792837	1		0.000876	0.578034	1
FCER2	-0.0016224	0.161639	1		-0.0021073	0.0502788	1		-0.0018233	0.228155	1
FCGR2A	-0.0093098	2.06e-16	6.03e-13		-0.0092051	1.94e-18	5.66e-15		-0.0059326	6.15e-05	0.179443
FCGR2B	-0.0018249	0.108321	1		-0.004222	6.29e-05	0.183595		0.0011397	0.443706	1
FCGR3B	0.0004809	0.671984	1		0.0011106	0.291917	1		0.0013621	0.358727	1
FCN1	-0.0074111	1.77e-09	5.17e-06		-0.0071023	5.56e-10	1.62e-06		-0.0055206	0.0005964	1
FCN2	-0.0044193	0.0001086	0.317036		-0.0055983	1.27e-07	0.0003713		-0.0022168	0.137719	1
FCRL1	0.0018041	0.117151	1		-0.0005263	0.622482	1		0.0006325	0.674816	1
FCRL2	0.0012895	0.253637	1		-7.14e-05	0.945827	1		-0.0005707	0.698459	1
FCRL3	-0.000736	0.514592	1		-0.0019108	0.0682031	1		2.97e-05	0.983947	1
FCRL5	-0.0123865	1.32e-25	3.87e-22		-0.0131666	4.77e-33	1.39e-29		-0.0054532	0.0004219	1
FCRL6	0.0016779	0.140266	1		0.0021622	0.0410156	1		0.0004381	0.767358	1
FCRLB	-0.0072645	2.5e-10	7.29e-07		-0.0080352	4.75e-14	1.39e-10		-0.0061791	3.96e-05	0.11565
FDX1	-0.0037695	0.0021087	1		-0.0040535	0.0003836	1		-0.0031588	0.0477632	1
FDX2	-0.0084725	4.37e-12	1.28e-08		-0.0088679	6.95e-15	2.03e-11		-0.0062796	8.07e-05	0.235579
FEN1	-0.0029496	0.009401	1		-0.0028038	0.0078369	1		-0.00376	0.0114542	1
FES	-0.0029077	0.0100672	1		-0.0026785	0.0106667	1		-0.000997	0.50034	1
FETUB	-0.0153181	1.24e-38	3.63e-35		-0.0146551	0	0		-0.0101249	5.03e-11	1.47e-07
FGA	-0.0166591	3.66e-37	1.07e-33		-0.0178196	0	0		-0.0087236	3.32e-07	0.0009699
FGD3	-0.0059343	8.47e-07	0.0024736		-0.0069608	5.22e-10	1.52e-06		-0.0015842	0.313855	1
FGF12	-0.0016357	0.181125	1		-0.0009355	0.410815	1		-0.0012139	0.446283	1
FGF16	-9.52e-05	0.938	1		-7.78e-05	0.945487	1		-0.0039796	0.0125649	1
FGF19	0.0026153	0.0202206	1		0.003871	0.0002205	0.643895		-0.0023459	0.110212	1
FGF2	-0.0070037	4.28e-10	1.25e-06		-0.0066996	1.35e-10	3.95e-07		-0.002877	0.0488487	1
FGF20	0.0039093	0.0013894	1		0.0040171	0.0004115	1		0.0008415	0.59745	1
FGF21	-0.0191571	0	0		-0.0197163	0	0		-0.0183774	2.81e-32	8.21e-29
FGF23	-0.0105591	3.84e-20	1.12e-16		-0.0086619	5.4e-16	1.58e-12		-0.0084763	1.57e-08	4.58e-05
FGF3	7.72e-05	0.94967	1		5.88e-05	0.958738	1		-0.0012029	0.450302	1
FGF5	-0.0024441	0.0436933	1		-0.0015427	0.17001	1		-0.0060233	0.000145	0.423329
FGF6	0.0013599	0.266246	1		0.0008218	0.470007	1		0.0025206	0.11376	1
FGF7	0.0017903	0.143442	1		0.0009456	0.406461	1		0.0014999	0.346233	1
FGF9	0.002336	0.056534	1		0.002657	0.0198013	1		0.0015109	0.343465	1
FGFBP1	-0.0021176	0.0748554	1		-0.0047712	1.6e-05	0.0468095		0.001166	0.452488	1
FGFBP2	-0.0024123	0.0499666	1		-0.0037392	0.0010899	1		0.003068	0.056263	1
FGFBP3	-0.0095285	2.08e-14	6.08e-11		-0.0098931	1.35e-17	3.94e-14		-0.0038779	0.0170007	1
FGFR2	-0.0123901	3.7e-24	1.08e-20		-0.0142087	7.35e-36	2.15e-32		-0.0110031	5.42e-12	1.58e-08
FGFR4	0.0051673	2.6e-05	0.0759989		0.006308	3.39e-08	9.89e-05		0.0013386	0.402827	1
FGL1	-0.0140703	5.84e-27	1.7e-23		-0.0097071	1.53e-15	4.48e-12		-0.0161509	3.29e-21	9.62e-18
FGR	-0.0054999	1.29e-06	0.0037726		-0.0062722	2.55e-09	7.44e-06		-0.0038744	0.0093891	1
FH	0.0010264	0.401819	1		0.0015045	0.186077	1		-0.0013784	0.38822	1
FHIP2A	-0.0016015	0.189135	1		-0.0021474	0.0585858	1		-0.0003613	0.819958	1
FHIT	-0.0060193	9.27e-08	0.0002706		-0.0062264	2.49e-09	7.28e-06		-0.001831	0.215984	1
FIS1	-0.0080119	9.83e-13	2.87e-09		-0.0084264	7.4e-16	2.16e-12		-0.0022296	0.128319	1
FKBP14	-0.0088587	1.99e-13	5.82e-10		-0.0091189	4.06e-16	1.19e-12		-0.0036431	0.0205997	1
FKBP1B	-0.004846	1.45e-05	0.0422182		-0.0053623	2.49e-07	0.0007269		-3.4e-05	0.981369	1
FKBP4	-0.0090339	8.05e-16	2.35e-12		-0.0093245	3.73e-19	1.09e-15		-0.0040678	0.0057202	1
FKBP5	-0.0071221	1.78e-10	5.19e-07		-0.0072088	3.72e-12	1.09e-08		-0.0029677	0.0427733	1
FKBP7	-0.0043915	9.44e-05	0.275681		-0.0036288	0.0005003	1		-0.0021874	0.138867	1
FKBPL	-0.0073711	1.15e-09	3.36e-06		-0.0080293	9.77e-13	2.85e-09		-0.0009453	0.550048	1
FLI1	0.000974	0.386432	1		0.0004866	0.641192	1		0.0017363	0.238302	1
FLRT2	-0.0001512	0.894424	1		0.0004775	0.651997	1		-0.0003655	0.806739	1
FLT1	-0.0027335	0.0159555	1		-0.001024	0.331274	1		-0.0021847	0.141135	1
FLT3	0.0080759	1.52e-12	4.44e-09		0.0074622	1.94e-12	5.66e-09		0.0043865	0.0033554	1
FLT3LG	-0.0083702	1.01e-12	2.95e-09		-0.0096565	9.12e-19	2.66e-15		-0.0036016	0.0186925	1
FLT4	-0.0117049	1.33e-24	3.9e-21		-0.013033	1.56e-34	4.56e-31		-0.0049766	0.0008621	1
FMNL1	-0.0046489	4.83e-05	0.141024		-0.0055015	2.1e-07	0.0006136		-0.0035761	0.017258	1
FMR1	-0.0003804	0.735312	1		-0.001017	0.330253	1		-5.73e-05	0.968974	1
FN1	-0.0098058	2.48e-15	7.24e-12		-0.0127731	1.36e-28	3.96e-25		-0.0033108	0.0405463	1
FNDC1	-0.0031481	0.0108873	1		-0.0044882	9.42e-05	0.274922		-0.0043454	0.0069944	1
FNTA	-0.0080108	4.18e-11	1.22e-07		-0.0088581	4.15e-15	1.21e-11		-0.003634	0.0217955	1
FOLH1	0.0041019	0.0008327	1		0.0029464	0.0098482	1		0.0006969	0.663071	1
FOLR1	0.0107204	4.07e-19	1.19e-15		0.0130918	8.93e-32	2.61e-28		0.0041211	0.0085944	1
FOLR2	-0.0073902	5.03e-10	1.47e-06		-0.0068287	6.61e-10	1.93e-06		-0.0094643	1.07e-09	3.11e-06
FOLR3	-0.0026094	0.0196651	1		-0.0031355	0.0025925	1		-0.0002669	0.855079	1
FOS	-0.0008614	0.482305	1		-0.0006435	0.572819	1		-0.0004299	0.78767	1
FOSB	0.0009253	0.410397	1		0.0004841	0.642097	1		0.0006771	0.646288	1
FOXJ3	-0.0046554	0.0001474	0.430544		-0.0052212	4.7e-06	0.013738		-0.0023593	0.139938	1
FOXO1	-0.0056209	5.33e-07	0.0015554		-0.0065658	3.02e-10	8.81e-07		-0.0022461	0.123774	1
FOXO3	-0.0034854	0.002011	1		-0.0046584	8.73e-06	0.0254771		-0.0020325	0.168954	1
FRMD4B	-0.0008689	0.476925	1		-0.0020046	0.0779815	1		0.0019842	0.212041	1
FRMD7	0.0014992	0.218815	1		0.0007987	0.481255	1		0.0011799	0.459396	1
FRZB	0.0043168	0.0001891	0.552264		0.0030099	0.0051119	1		0.0034354	0.0237076	1
FSHB	-0.0044195	0.0205613	1		-0.0042028	0.0178694	1		-0.0100222	5.89e-05	0.172023
FST	-0.0094371	3.26e-16	9.52e-13		-0.0076258	1.35e-12	3.95e-09		-0.0066913	9.12e-06	0.026631
FSTL1	-0.0095368	1.61e-14	4.71e-11		-0.0077656	1.79e-11	5.22e-08		-0.0109743	1.41e-11	4.12e-08
FSTL3	-0.0155927	4.14e-36	1.21e-32		-0.0147107	5.68e-37	1.66e-33		-0.0130508	8.44e-16	2.47e-12
FTCD	-0.0143325	1.61e-28	4.69e-25		-0.0185823	0	0		-0.005908	0.0004615	1
FUCA1	-0.0097365	4.87e-18	1.42e-14		-0.0098709	3.46e-21	1.01e-17		-0.0070333	1.66e-06	0.004843
FUOM	-0.0127022	2.74e-22	7.99e-19		-0.0178679	0	0		-0.0039019	0.0220773	1
FURIN	-0.0262185	0	0		-0.0277777	0	0		-0.0155325	2.3e-22	6.72e-19
FUS	-0.0071193	4.59e-10	1.34e-06		-0.0082633	6.51e-15	1.9e-11		-0.0036703	0.0141539	1
FUT1	0.0021664	0.0747652	1		0.0017092	0.130662	1		0.0018312	0.247957	1
FUT3_FUT5	-0.0070006	3.15e-09	9.19e-06		-0.0055125	5.36e-07	0.0015662		-0.0071356	3.76e-06	0.0109818
FUT8	-0.0091004	3.56e-16	1.04e-12		-0.0083312	9.73e-16	2.84e-12		-0.0067781	3.7e-06	0.0107959
FXN	-0.0116328	2.05e-25	5.99e-22		-0.0119659	1.1e-30	3.2e-27		-0.0064078	1.1e-05	0.0321029
FXYD5	-0.0053916	1.56e-06	0.0045521		-0.005933	1.22e-08	3.55e-05		-0.0018026	0.219721	1
FYB1	-0.0079129	2.18e-12	6.38e-09		-0.0084678	5.8e-16	1.69e-12		-0.0022985	0.118312	1
FZD10	0.0010628	0.383189	1		0.0010792	0.341119	1		0.0013048	0.413117	1
FZD8	0.00234	0.0559588	1		0.0023021	0.0430456	1		0.0010409	0.514693	1
GABARAP	-0.0018434	0.12745	1		-0.0008517	0.44863	1		-0.0016451	0.297002	1
GABARAPL1	0.0015776	0.194129	1		0.0013201	0.242756	1		0.0011204	0.479411	1
GABRA4	0.0001707	0.889038	1		0.0003101	0.785024	1		0.0002227	0.889033	1
GAD1	0.0008303	0.497521	1		-0.0001821	0.872988	1		0.0025858	0.1045	1
GAD2	0.001344	0.271974	1		0.0015371	0.176688	1		-0.0004683	0.768957	1
GADD45B	-0.0010756	0.375379	1		-0.0014744	0.191436	1		-0.0019564	0.216243	1
GADD45GIP1	-0.0109595	3.8e-19	1.11e-15		-0.0103211	1.35e-19	3.93e-16		-0.0064672	5.48e-05	0.160156
GAGE2A	0.0018764	0.125356	1		0.0022787	0.0455419	1		0.001123	0.480861	1
GAL	0.0071741	1.22e-09	3.55e-06		0.004716	1.76e-05	0.0513564		0.0073694	1.69e-06	0.0049415
GALNT10	-0.0094775	3.47e-16	1.01e-12		-0.0090057	7.47e-17	2.18e-13		-0.0071824	2.35e-06	0.0068645
GALNT2	0.0091819	1.14e-15	3.31e-12		0.0072058	1.44e-11	4.19e-08		0.008475	1.45e-08	4.23e-05
GALNT3	0.0012002	0.288618	1		0.0001119	0.915105	1		-0.0002276	0.877758	1
GALNT5	0.002897	0.0180753	1		0.0023194	0.0418916	1		0.0044326	0.0056022	1
GALNT7	-0.0007661	0.496641	1		-0.0017728	0.0904925	1		-0.0005184	0.725241	1
GAMT	-0.000783	0.521098	1		-0.0011478	0.312364	1		-0.0004569	0.77359	1
GAPDH	-0.0085695	6.07e-12	1.77e-08		-0.0097795	3.44e-17	1.01e-13		-0.0051195	0.0016391	1
GART	0.0021614	0.0732428	1		0.0017726	0.114142	1		0.0031449	0.0457842	1
GAS2	-0.0029068	0.017131	1		-0.0041243	0.0002763	0.806717		-0.0005665	0.7216	1
GAS6	-0.0090033	3.86e-15	1.13e-11		-0.0075982	9.51e-13	2.78e-09		-0.0084034	1.97e-08	5.76e-05
GASK1A	-0.0059628	1.66e-06	0.0048601		-0.0078098	1.58e-11	4.61e-08		-0.0011235	0.488067	1
GAST	-0.0140895	2.81e-29	8.19e-26		-0.0121965	1.35e-25	3.93e-22		-0.0104948	1.4e-10	4.08e-07
GATA3	-0.0006419	0.599748	1		-0.0004485	0.693652	1		0.0002188	0.890679	1
GATD3	-0.0098602	8.66e-16	2.53e-12		-0.0100149	1.53e-18	4.48e-15		-0.0056735	0.0004022	1
GBA	-0.0039135	0.0013687	1		-0.0030872	0.0066311	1		-0.0037872	0.0178795	1
GBP1	-0.0120917	5.63e-23	1.64e-19		-0.0119585	8.51e-26	2.49e-22		-0.0092065	8.17e-09	2.39e-05
GBP2	-0.005503	9.87e-07	0.0028806		-0.0049804	1.81e-06	0.0052758		-0.0043127	0.0033755	1
GBP4	-0.0055035	9.94e-07	0.0029012		-0.0056315	6.54e-08	0.0001911		-0.0040291	0.0063626	1
GBP6	0.0010802	0.375937	1		0.0011647	0.305172	1		-0.0012888	0.416984	1
GC	0.001597	0.186373	1		0.0008286	0.460938	1		0.0012192	0.439195	1
GCC1	-0.0087381	4.73e-13	1.38e-09		-0.0096694	7.26e-18	2.12e-14		-0.0031158	0.0478943	1
GCG	-0.0071629	5.74e-10	1.68e-06		-0.0090256	4e-17	1.17e-13		-0.0052504	0.0005226	1
GCHFR	-0.0032242	0.0139807	1		-0.0044379	0.0002821	0.823728		-0.0003544	0.835629	1
GCLM	-0.0028667	0.0191471	1		-0.0039109	0.000597	1		0.0012108	0.447135	1
GCNT1	-0.0012452	0.283823	1		-0.0006992	0.517273	1		-0.0010553	0.48771	1
GDF15	-0.0287042	0	0		-0.0240521	0	0		-0.0248744	0	0
GDF2	0.0014145	0.245624	1		0.0007659	0.498261	1		-0.0009477	0.552438	1
GDNF	-0.0083397	1.04e-12	3.04e-09		-0.0073964	9.17e-12	2.68e-08		-0.0046116	0.0026965	1
GET3	-0.0006629	0.581527	1		-0.0006913	0.536622	1		0.0021164	0.177769	1
GFAP	-0.0098403	1.37e-15	4e-12		-0.0090177	3.24e-15	9.46e-12		-0.011503	9.99e-13	2.92e-09
GFER	-0.0087714	1.94e-14	5.65e-11		-0.0098656	1.77e-20	5.17e-17		-0.0029137	0.0522117	1
GFOD2	0.0005793	0.606714	1		0.0002608	0.802873	1		0.0016352	0.267082	1
GFRA1	-0.0127109	3.09e-25	9.02e-22		-0.0133236	1.41e-31	4.12e-28		-0.012965	4.76e-16	1.39e-12
GFRA2	0.0014621	0.194159	1		0.0011409	0.275625	1		-0.0011883	0.420124	1
GFRA3	0.0037185	0.0014571	1		0.0029924	0.0058493	1		0.0014639	0.33935	1
GFRAL	0.0065675	2.22e-07	0.0006493		0.0050991	1.53e-05	0.0445821		0.0022028	0.182669	1
GGA1	0.0032058	0.0044976	1		0.0027762	0.0079294	1		0.0011883	0.422445	1
GGACT	-0.0068631	1.18e-08	3.43e-05		-0.0072036	1.23e-10	3.6e-07		-0.002956	0.0599969	1
GGCT	-0.0085459	1.16e-12	3.39e-09		-0.00937	5.02e-17	1.47e-13		-0.0021171	0.178346	1
GGH	-0.0204437	0	0		-0.0217931	0	0		-0.0142964	2.07e-19	6.04e-16
GGT1	-0.021009	0	0		-0.0245162	0	0		-0.0125398	3.4e-14	9.94e-11
GGT5	0.0003967	0.727344	1		0.0010007	0.343997	1		-0.0018625	0.212047	1
GH1	0.0077498	1.09e-10	3.18e-07		0.0103471	1.6e-20	4.67e-17		0.0018685	0.234832	1
GH2	0.001184	0.294436	1		0.0005137	0.624156	1		0.0013058	0.377156	1
GHR	-0.0152043	3.01e-30	8.78e-27		-0.0206227	0	0		-0.0031773	0.0669037	1
GHRHR	-0.0003698	0.74207	1		-0.0004326	0.677824	1		0.0022901	0.120518	1
GHRL	0.0052024	1.71e-05	0.0499497		0.00804	8.08e-13	2.36e-09		0.0014122	0.372758	1
GID8	-0.0010443	0.384941	1		0.0007132	0.523402	1		-0.0024912	0.112192	1
GIGYF2	-0.0048862	5.36e-05	0.156434		-0.0061202	5.27e-08	0.000154		-0.0007241	0.64647	1
GIMAP7	-0.0034638	0.0050302	1		-0.0034406	0.0027396	1		-0.0001464	0.927434	1
GIMAP8	-0.0040145	0.0011749	1		-0.004923	1.91e-05	0.0558097		-0.0014036	0.383343	1
GIP	-0.0039823	0.0020191	1		-0.0026568	0.0267695	1		-0.0041139	0.0147169	1
GIPC2	-0.0095361	4.68e-14	1.37e-10		-0.0095542	4.4e-16	1.28e-12		-0.0072507	1.09e-05	0.03185
GIPC3	-0.0072352	1.93e-09	5.64e-06		-0.0076279	9.8e-12	2.86e-08		-0.0024797	0.115152	1
GIPR	0.0011317	0.35483	1		0.0011731	0.302365	1		-0.0006799	0.669654	1
GIT1	-0.0043601	0.0003793	1		-0.0056667	6.78e-07	0.0019791		0.0006185	0.69882	1
GJA8	0.0022351	0.0676969	1		0.0012817	0.260412	1		0.0027576	0.0832469	1
GKN1	-0.0012489	0.276568	1		-5.86e-05	0.956041	1		-0.0031767	0.0354367	1
GLA	-0.0174809	0	0		-0.0200642	0	0		-0.0106947	2.24e-10	6.53e-07
GLB1	-0.0105372	1.17e-19	3.42e-16		-0.0103701	7.52e-22	2.2e-18		-0.0053719	0.0004252	1
GLI2	0.0037644	0.0021376	1		0.0044486	9.54e-05	0.278486		0.0002536	0.873872	1
GLO1	-0.0098835	4.81e-18	1.41e-14		-0.0109194	5.62e-25	1.64e-21		-0.0057875	0.0001108	0.323519
GLOD4	-0.0073708	6.14e-11	1.79e-07		-0.0084931	5.43e-16	1.58e-12		-0.0018732	0.202836	1
GLP1R	0.0032569	0.0078022	1		0.0024468	0.0315106	1		0.0028523	0.0741626	1
GLRX	-0.0049015	1.4e-05	0.0408059		-0.0050982	1.12e-06	0.0032764		-0.001759	0.233114	1
GLRX5	-0.0121268	3e-23	8.77e-20		-0.0122553	3.71e-27	1.08e-23		-0.0074139	3.15e-06	0.0092037
GLT8D2	-0.0013556	0.227717	1		-0.0009444	0.364497	1		-0.0035058	0.0174771	1
GLYR1	-0.0003262	0.78702	1		-0.0017635	0.116006	1		0.000613	0.697055	1
GM2A	-0.0072147	1.61e-08	4.71e-05		-0.0057936	1.09e-06	0.0031682		-0.0076378	4.91e-06	0.0143452
GMFG	-0.0072098	2.02e-09	5.89e-06		-0.0078294	2.55e-12	7.44e-09		-0.0019441	0.215733	1
GMPR	-0.002901	0.0105975	1		-0.0038305	0.0002849	0.831781		0.0013403	0.365267	1
GMPR2	-0.0074893	9.32e-10	2.72e-06		-0.008643	3.07e-14	8.98e-11		-0.0016541	0.299322	1
GNAS	-0.0042287	0.0005043	1		-0.0037374	0.0009458	1		8.03e-05	0.959622	1
GNE	-0.0057466	3.54e-07	0.0010336		-0.0071856	6.93e-12	2.02e-08		-0.0009636	0.514354	1
GNGT1	0.0002111	0.862607	1		0.001642	0.147839	1		-0.0025391	0.11153	1
GNLY	-0.0083091	2.81e-13	8.19e-10		-0.0080531	2.49e-14	7.26e-11		-0.0028822	0.0523259	1
GNPDA1	-3.42e-05	0.977696	1		-0.0009873	0.385066	1		-0.0001008	0.949694	1
GNPDA2	-0.0064768	1.17e-07	0.0003412		-0.0076283	1.95e-11	5.69e-08		-0.000146	0.926923	1
GOLGA3	-0.0059444	8.57e-07	0.0025019		-0.0070413	3.59e-10	1.05e-06		-0.0008621	0.584442	1
GOLM2	-0.018654	0	0		-0.0190342	0	0		-0.0136067	2.53e-19	7.4e-16
GOPC	-0.0065141	6.12e-09	1.79e-05		-0.0074742	7.38e-13	2.15e-09		-0.0013375	0.359232	1
GORASP2	-0.0057812	1.75e-06	0.005097		-0.0068089	1.38e-09	4.02e-06		-0.0012497	0.428698	1
GOT1	-0.0048702	8.11e-05	0.236917		-0.0075883	4.06e-11	1.19e-07		-0.0006895	0.66924	1
GP1BA	-0.0010927	0.331943	1		-0.0007914	0.448849	1		-0.0008685	0.555119	1
GP1BB	-0.007788	1.93e-10	5.62e-07		-0.0078897	4.25e-12	1.24e-08		-0.0044173	0.0055363	1
GP2	-0.0053964	3.6e-06	0.0105145		-0.0029639	0.006037	1		-0.0040695	0.007747	1
GP5	-0.0050397	3.51e-05	0.102415		-0.0056144	7.2e-07	0.0021014		-0.0023773	0.133932	1
GP6	-0.0073617	5.31e-11	1.55e-07		-0.007516	5.39e-13	1.57e-09		-0.0032838	0.0249895	1
GPA33	-0.0075312	3.28e-11	9.58e-08		-0.0071845	9.8e-12	2.86e-08		-0.0017779	0.231687	1
GPC1	0.0063146	4.75e-08	0.0001386		0.0049077	5.12e-06	0.0149641		0.0050683	0.0007808	1
GPC5	0.0017727	0.114468	1		0.0002892	0.781723	1		0.0020269	0.168885	1
GPD1	-0.0189972	0	0		-0.0216968	0	0		-0.0111871	3.55e-11	1.04e-07
GPHA2	-0.0009488	0.436075	1		-0.0013166	0.244964	1		-0.001659	0.296938	1
GPI	-0.0098911	2.8e-16	8.18e-13		-0.0107376	1.25e-21	3.64e-18		-0.0042097	0.0076657	1
GPIHBP1	-0.0010437	0.385734	1		-0.0005211	0.641326	1		-0.0018599	0.236486	1
GPKOW	-0.0073139	1.45e-10	4.24e-07		-0.0074304	2.09e-12	6.11e-09		-0.0050593	0.0007324	1
GPNMB	-0.0028475	0.0136521	1		-0.004062	0.0001508	0.440436		-0.0013173	0.383219	1
GPR101	0.0018783	0.124944	1		0.0010274	0.366537	1		0.0038142	0.0169442	1
GPR158	-0.0058713	1.51e-06	0.0043983		-0.0046425	4.31e-05	0.125743		-0.0020329	0.201884	1
GPR15L	-0.01858	0	0		-0.0156129	0	0		-0.0165437	1.67e-23	4.87e-20
GPR37	-0.0132434	2.84e-29	8.31e-26		-0.0119768	6.06e-28	1.77e-24		-0.0111136	6.66e-13	1.95e-09
GPRC5C	-0.0075344	6.28e-10	1.83e-06		-0.0086995	1.56e-14	4.55e-11		-0.0080121	4.64e-07	0.0013552
GRAP2	-0.0072598	7.11e-11	2.08e-07		-0.0080381	7.51e-15	2.19e-11		-0.0017641	0.226528	1
GRHPR	-0.0094719	5.63e-15	1.64e-11		-0.0110597	1.04e-22	3.04e-19		-0.0024748	0.118189	1
GRIK2	-0.0022928	0.0573019	1		-0.0018628	0.0967232	1		-0.0026774	0.0889084	1
GRIN2B	0.0024101	0.0489268	1		0.0018425	0.105262	1		-0.0003989	0.802778	1
GRK5	-0.0008912	0.426848	1		-0.0015485	0.136341	1		0.0022924	0.118974	1
GRN	-0.0135828	3.57e-32	1.04e-28		-0.0136415	2.56e-37	7.48e-34		-0.0107264	9.43e-13	2.75e-09
GRP	-0.0064016	1.99e-07	0.0005811		-0.0097821	1.25e-17	3.65e-14		-0.0019133	0.234635	1
GRPEL1	-0.0128401	2.05e-29	5.99e-26		-0.0135376	2.16e-37	6.31e-34		-0.0090895	1.15e-09	3.37e-06
GRSF1	-0.0059786	1.31e-06	0.0038251		-0.0068986	2.01e-09	5.86e-06		-0.0041867	0.0092569	1
GSAP	-0.0005665	0.614737	1		-0.0008341	0.424779	1		0.0001813	0.902068	1
GSN	0.0081712	3.25e-11	9.49e-08		0.0070222	8.7e-10	2.54e-06		0.0055237	0.0005891	1
GSR	-0.010317	5.96e-17	1.74e-13		-0.0119149	2.68e-25	7.84e-22		-0.0007991	0.619727	1
GSTA1	-0.0140733	3.75e-31	1.09e-27		-0.0185166	0	0		-0.0053458	0.0007665	1
GSTA3	-0.0111827	7.25e-21	2.12e-17		-0.0151625	0	0		-0.0028851	0.0650022	1
GSTM4	-0.0008591	0.481496	1		-0.0003872	0.733313	1		-0.0009338	0.556658	1
GSTP1	0.00126	0.263817	1		0.0013072	0.210625	1		0.001971	0.183074	1
GSTT2B	-0.0034565	0.0040398	1		-0.0035393	0.0015421	1		-0.0009984	0.523986	1
GTF2IRD1	-0.003713	0.0022207	1		-0.0037121	0.0010091	1		-0.0035477	0.0249811	1
GTPBP2	-0.0055343	5.83e-06	0.0170124		-0.0068171	1.94e-09	5.65e-06		-0.000626	0.695149	1
GUCA2A	0.0018238	0.11967	1		0.0037819	0.0005096	1		-0.0057935	0.0001529	0.446596
GUCY2C	0.001713	0.15877	1		0.0022528	0.0463196	1		0.0011748	0.458538	1
GUK1	0.0017272	0.156818	1		0.001558	0.170117	1		0.0009831	0.535799	1
GUSB	-0.0223997	0	0		-0.0259475	0	0		-0.0113194	5.51e-12	1.61e-08
GYS1	-0.0064431	1.03e-08	3.02e-05		-0.0080283	1.38e-14	4.04e-11		-0.0010701	0.468346	1
GZMA	-0.0088721	8.89e-15	2.6e-11		-0.0105837	2.55e-23	7.45e-20		-0.0046519	0.0018292	1
GZMB	-0.0008145	0.476437	1		-0.002572	0.0156293	1		0.0049207	0.0009494	1
GZMH	-0.0091961	1.41e-15	4.12e-12		-0.0101135	2.67e-21	7.78e-18		-0.0032649	0.0306628	1
H2AP	8.04e-05	0.947576	1		0.0004721	0.67845	1		-0.0017295	0.277317	1
HADH	-0.0013656	0.262851	1		-0.0016312	0.150865	1		-0.0009891	0.533234	1
HAGH	-0.0020652	0.0707375	1		-0.0028974	0.0064471	1		0.001109	0.456682	1
HAO1	-0.0127662	3.32e-27	9.7e-24		-0.0160865	0	0		-0.0091054	3.55e-09	1.04e-05
HARS1	-0.0075554	1.65e-11	4.81e-08		-0.0082804	1.89e-15	5.51e-12		-0.0018202	0.213983	1
HAVCR1	-0.0208161	0	0		-0.0210679	0	0		-0.0141632	2.26e-17	6.59e-14
HAVCR2	-0.0078889	5.88e-11	1.72e-07		-0.0058312	1.88e-07	0.0005502		-0.0093199	3.11e-09	9.08e-06
HBEGF	-0.0070264	4.15e-10	1.21e-06		-0.007329	2.51e-12	7.32e-09		-0.0020715	0.157786	1
HBQ1	0.0039144	0.0005427	1		0.0026423	0.0121257	1		0.0051904	0.0004384	1
HBZ	0.0024854	0.0385251	1		0.0015001	0.179427	1		0.0037118	0.0179509	1
HCG22	0.0009782	0.422848	1		0.0007957	0.483777	1		0.0025216	0.112392	1
HCLS1	-0.0080697	5.18e-13	1.51e-09		-0.0087647	3.35e-17	9.79e-14		-0.0021694	0.136765	1
HDAC8	0.0029379	0.0165001	1		0.0030379	0.0076741	1		0.0005922	0.710723	1
HDAC9	-0.0002046	0.867135	1		-0.0009313	0.412689	1		-0.0011074	0.487804	1
HDDC2	-5.22e-05	0.965532	1		-3.43e-05	0.975662	1		0.001845	0.24223	1
HDGF	-0.0024429	0.0288505	1		-0.0037782	0.0002811	0.820807		0.0012321	0.39826	1
HDGFL2	-0.0101531	7.49e-17	2.19e-13		-0.0108869	6.58e-22	1.92e-18		-0.0039503	0.0128285	1
HEBP1	-0.0021914	0.0505778	1		-0.0019114	0.0658126	1		-0.000639	0.663688	1
HEG1	-0.0189147	0	0		-0.0204534	0	0		-0.011477	1.4e-11	4.1e-08
HEPACAM2	0.0056149	4.27e-06	0.0124647		0.006332	2.44e-08	7.12e-05		0.0060579	0.000141	0.411829
HEPH	-0.00869	3.58e-12	1.04e-08		-0.009916	1.46e-17	4.27e-14		-0.0029342	0.072294	1
HEXIM1	-0.0080467	9.48e-13	2.77e-09		-0.0092726	9.15e-19	2.67e-15		-0.0023585	0.10809	1
HGF	-0.0269878	0	0		-0.0277274	0	0		-0.0163573	3.92e-24	1.14e-20
HGFAC	0.0003516	0.774383	1		-6.93e-06	0.995152	1		-0.0011256	0.481798	1
HGS	-0.0068881	1.06e-09	3.09e-06		-0.0077129	1.86e-13	5.43e-10		-0.0010883	0.461745	1
HHEX	-0.0137694	7.48e-29	2.18e-25		-0.0146205	3.82e-37	1.11e-33		-0.0077922	1.32e-06	0.0038598
HIF1A	-0.0018688	0.126643	1		-0.0021298	0.0612075	1		-0.0016418	0.303056	1
HIP1	-0.0011576	0.342746	1		-0.0025074	0.0272879	1		-0.0010232	0.51937	1
HIP1R	-0.0134873	3.76e-27	1.1e-23		-0.0128245	2.49e-28	7.28e-25		-0.0117798	4.76e-13	1.39e-09
HJV	-0.0107831	3.36e-18	9.8e-15		-0.0111253	4.77e-22	1.39e-18		-0.0066295	4.19e-05	0.122483
HK2	-0.0007365	0.51105	1		-0.0009971	0.337118	1		-0.0014056	0.338726	1
HLA_A	-0.0046382	0.0001248	0.364331		-0.0034215	0.0023379	1		-0.0058044	0.0002339	0.682873
HLA_DRA	-0.0037257	0.0009964	1		-0.0030118	0.0042327	1		-0.0029537	0.045005	1
HLA_E	-0.0038848	0.0008544	1		-0.0008136	0.452792	1		-0.0087326	8.43e-09	2.46e-05
HMBS	0.0005138	0.65098	1		-0.0006109	0.563337	1		0.0025763	0.0820522	1
HMCN2	-0.0051899	2.88e-05	0.0840071		-0.0052973	4.42e-06	0.0129176		-0.0030178	0.0616563	1
HMGCL	-0.0081699	2.27e-11	6.63e-08		-0.0087215	1.62e-14	4.73e-11		-0.0033734	0.0347543	1
HMGCS1	0.0007935	0.515354	1		0.0004284	0.705976	1		0.0014229	0.370076	1
HMMR	-0.0008876	0.468571	1		-0.0016361	0.151256	1		0.0008117	0.610373	1
HMOX1	0.0029629	0.0108436	1		0.0019962	0.0645294	1		0.004319	0.004521	1
HMOX2	-0.0083014	2.83e-13	8.28e-10		-0.0092648	1.42e-18	4.14e-15		-0.005834	9.3e-05	0.271562
HNF1A	-0.0006135	0.614697	1		0.0001691	0.881405	1		-0.0015167	0.341455	1
HNMT	-0.0092021	1.5e-14	4.37e-11		-0.0102759	2.6e-20	7.59e-17		-0.0054601	0.0005185	1
HNRNPK	-0.0085944	2.86e-14	8.35e-11		-0.0093712	3.65e-19	1.07e-15		-0.0031245	0.0349682	1
HNRNPUL1	-0.0118238	5.13e-22	1.5e-18		-0.0122917	4.03e-27	1.18e-23		-0.0049421	0.0020182	1
HPCAL1	-0.0071711	1.21e-10	3.55e-07		-0.0074921	4.75e-13	1.39e-09		-0.0029295	0.0437907	1
HPGDS	-0.0003092	0.783324	1		-0.0005588	0.592474	1		0.0001846	0.900213	1
HPSE	-0.0130911	3.65e-27	1.07e-23		-0.0128072	6.97e-30	2.04e-26		-0.00696	1.18e-05	0.0345549
HRAS	-2.29e-05	0.984957	1		0.0004401	0.696905	1		-0.0015442	0.329616	1
HRC	0.0043901	0.0003709	1		0.0048105	2.73e-05	0.0797121		0.0036322	0.0242879	1
HRG	-0.0003217	0.792982	1		-0.0021563	0.0584143	1		0.0014795	0.354758	1
HS1BP3	-0.008466	4.7e-12	1.37e-08		-0.0090062	2.56e-15	7.47e-12		-0.0037787	0.018296	1
HS3ST3B1	-0.003533	0.0016528	1		-0.0034859	0.000836	1		-0.0030042	0.0409595	1
HS6ST1	-0.0043629	0.0001127	0.329012		-0.0052276	6.64e-07	0.0019392		-0.0023366	0.112899	1
HS6ST2	-0.0038105	0.0034176	1		-0.0019786	0.102152	1		-0.0023231	0.170804	1
HSBP1	-0.0072848	2.5e-09	7.29e-06		-0.0072032	2.31e-10	6.74e-07		-0.0045486	0.0044216	1
HSD11B1	0.0107754	3.44e-19	1.01e-15		0.0134151	4.02e-33	1.17e-29		0.0039225	0.0123219	1
HSD17B14	-0.0020959	0.0846196	1		-0.0040137	0.0003815	1		-0.0010524	0.506406	1
HSD17B3	-0.0016383	0.179847	1		-0.001898	0.0951259	1		-0.0007315	0.645436	1
HSDL2	-0.0137021	2.59e-28	7.57e-25		-0.015947	0	0		-0.0092904	1.08e-08	3.14e-05
HSP90B1	0.0010045	0.372711	1		0.0006267	0.548364	1		-0.0001155	0.93776	1
HSPA1A	-0.0091795	2.94e-16	8.58e-13		-0.0098155	5.61e-21	1.64e-17		-0.0028354	0.0530759	1
HSPA2	-0.0004206	0.726829	1		-0.0006578	0.556609	1		0.0001098	0.944241	1
HSPB1	-0.0077084	6.81e-12	1.99e-08		-0.008253	2.59e-15	7.57e-12		-0.0034107	0.0202283	1
HSPB6	-0.0009389	0.474469	1		0.0013511	0.268777	1		-0.0056581	0.0009514	1
HSPG2	-0.0125081	7.64e-25	2.23e-21		-0.0116517	4.93e-25	1.44e-21		-0.009475	2.47e-09	7.21e-06
HTR1A	0.0002629	0.830097	1		0.000303	0.790161	1		-0.0013009	0.41587	1
HTR1B	0.0017214	0.159682	1		0.0017458	0.124925	1		-0.0007542	0.636823	1
HTRA2	-0.0081065	4.35e-13	1.27e-09		-0.0090423	3.76e-18	1.1e-14		-0.0028119	0.0543564	1
HYAL1	-0.0110042	2.48e-21	7.23e-18		-0.0104093	4.7e-22	1.37e-18		-0.0083344	3.88e-08	0.0001132
HYOU1	-0.0009754	0.389571	1		8.41e-05	0.936321	1		-0.002542	0.0857207	1
ICA1	-0.0055753	6.9e-07	0.0020161		-0.0062596	1.89e-09	5.51e-06		-0.0004198	0.775173	1
ICAM1	-0.0153679	1.91e-38	5.57e-35		-0.0151881	0	0		-0.0117269	3.87e-14	1.13e-10
ICAM2	-0.0015671	0.160854	1		-0.0006159	0.553028	1		-0.0020451	0.160832	1
ICAM3	-0.0068496	1.04e-09	3.03e-06		-0.0064009	8.25e-10	2.41e-06		-0.0052001	0.0003847	1
ICAM4	0.0002113	0.851553	1		0.0006045	0.564958	1		0.0025891	0.0781436	1
ICAM5	0.0020856	0.0703078	1		0.0050786	2.05e-06	0.0059877		-0.0008783	0.5605	1
ICOSLG	0.0065482	5.78e-09	1.69e-05		0.0069024	3.97e-11	1.16e-07		0.0014081	0.338861	1
ID4	-0.0002715	0.822986	1		-0.0004798	0.670845	1		0.0005889	0.709805	1
IDI2	8.63e-05	0.940558	1		0.0011458	0.285052	1		-0.0016963	0.263904	1
IDO1	-0.0078288	4.26e-10	1.24e-06		-0.0083768	6.7e-13	1.96e-09		-0.0033998	0.0381365	1
IDS	-0.0006754	0.546999	1		-0.0002654	0.799155	1		-0.0015667	0.284066	1
IDUA	-0.0121871	5.2e-27	1.52e-23		-0.0128853	2.19e-34	6.41e-31		-0.0093496	2.51e-10	7.34e-07
IFI30	-0.0220177	0	0		-0.0193574	0	0		-0.015578	1.16e-18	3.38e-15
IFIT1	0.0007465	0.538597	1		0.0004143	0.713708	1		0.0001566	0.921176	1
IFIT3	-0.0040536	0.0008553	1		-0.0039131	0.0005394	1		-0.0040301	0.0110098	1
IFNAR1	-0.0002823	0.815576	1		-0.0001565	0.889381	1		0.0010686	0.498917	1
IFNG	-0.0058092	2.81e-07	0.0008198		-0.0045061	1.76e-05	0.0513686		-0.006702	5.94e-06	0.017345
IFNGR1	0.0062369	5.99e-08	0.0001748		0.0061447	9.57e-09	2.79e-05		0.0012877	0.391016	1
IFNGR2	-0.0142199	4.28e-36	1.25e-32		-0.0141202	0	0		-0.0101675	8.35e-12	2.44e-08
IFNL1	-0.0035143	0.0018991	1		-0.0026081	0.0128774	1		-0.0058341	8.58e-05	0.250548
IFNL2	0.0002645	0.828882	1		0.000332	0.770312	1		-0.000286	0.857843	1
IFNLR1	-0.0056937	7.82e-07	0.0022822		-0.0061266	1.1e-08	3.2e-05		-0.003231	0.0312871	1
IFNW1	0.0012638	0.300195	1		0.0003389	0.76537	1		0.0015836	0.318544	1
IFT20	-0.0024567	0.0441473	1		-0.0026189	0.0210727	1		-0.0008811	0.581078	1
IGBP1	-0.0068659	1.49e-08	4.35e-05		-0.0076724	1e-11	2.93e-08		-0.0018314	0.247179	1
IGDCC3	0.0012296	0.314645	1		0.0013143	0.247492	1		0.0005584	0.726367	1
IGDCC4	0.0141771	3.91e-28	1.14e-24		0.0115111	8.28e-22	2.42e-18		0.013208	4.43e-15	1.29e-11
IGF1R	-0.0031467	0.006654	1		-0.0028295	0.0086466	1		-0.0009139	0.547088	1
IGF2BP3	0.0023413	0.0554333	1		0.0010784	0.343316	1		0.0027522	0.0836246	1
IGF2R	-0.0109235	6.92e-21	2.02e-17		-0.0113523	9.27e-26	2.71e-22		-0.0076207	5.47e-07	0.0015963
IGFBP1	0.0088855	5.4e-13	1.58e-09		0.0161556	0	0		-0.0024895	0.121464	1
IGFBP2	0.0159405	6.16e-36	1.8e-32		0.0227071	0	0		0.0001458	0.9302	1
IGFBP3	0.0069074	3.86e-09	1.13e-05		0.0053863	7.43e-07	0.0021688		0.0090561	3.42e-09	9.97e-06
IGFBP4	-0.0133396	2.37e-26	6.93e-23		-0.0097225	8.72e-17	2.55e-13		-0.0139411	1.86e-17	5.45e-14
IGFBP6	-0.0025497	0.0550025	1		-0.001689	0.170647	1		-0.0033183	0.0560064	1
IGFBP7	-0.0131862	2.32e-28	6.79e-25		-0.0113636	1.24e-24	3.64e-21		-0.0104362	2.15e-11	6.28e-08
IGFBPL1	-0.0096627	8.02e-16	2.34e-12		-0.0084636	2.99e-14	8.72e-11		-0.0086003	4.41e-08	0.0001289
IGFL4	0.0009504	0.437396	1		0.0015959	0.160831	1		0.0004951	0.756186	1
IGHMBP2	0.0008721	0.475228	1		-0.0001846	0.871061	1		0.0016674	0.294243	1
IGLC2	-0.0118887	2.07e-22	6.04e-19		-0.0096127	2.53e-17	7.38e-14		-0.0095017	2.45e-09	7.15e-06
IGLON5	-0.0009592	0.433044	1		-0.0010043	0.377861	1		-0.0008999	0.571909	1
IGSF21	-0.0042471	0.0007919	1		-0.0051003	1.47e-05	0.0428379		-0.0023909	0.148559	1
IGSF3	-0.0217077	0	0		-0.0243978	0	0		-0.0120817	1.41e-14	4.11e-11
IGSF8	-0.0157933	0	0		-0.0155418	0	0		-0.011467	2.19e-14	6.4e-11
IGSF9	-0.0243715	0	0		-0.030097	0	0		-0.0131893	8.34e-14	2.44e-10
IKBKG	-0.0029244	0.0091591	1		-0.0047911	4.42e-06	0.0128965		0.0012796	0.380994	1
IKZF2	0.002275	0.0439025	1		0.0020729	0.0479854	1		1.42e-06	0.999233	1
IL10	-0.0023375	0.0375401	1		-0.0016397	0.115862	1		-0.0041711	0.0045584	1
IL10RA	0.0011197	0.318609	1		0.000713	0.493696	1		0.0005021	0.732498	1
IL10RB	-0.0046447	7.81e-05	0.228056		-0.004195	0.0001259	0.367766		-0.0050814	0.0009208	1
IL11	-0.0016497	0.141452	1		-0.0018387	0.0773557	1		-0.0004938	0.736579	1
IL12A_IL12B	-0.0026094	0.0273328	1		-0.0032717	0.0029085	1		-0.0025062	0.105399	1
IL12B	-0.0013167	0.265577	1		-0.0024167	0.0280001	1		-0.0014856	0.335425	1
IL12RB1	-0.0070024	9.78e-10	2.86e-06		-0.0066518	3.89e-10	1.14e-06		-0.0080991	6.53e-08	0.0001908
IL12RB2	0.0049043	6.87e-05	0.200508		0.0035225	0.0021084	1		0.0029868	0.0628216	1
IL13	-0.0024287	0.030264	1		-0.0021783	0.0362325	1		0.0010546	0.472125	1
IL13RA1	-0.0112894	1.49e-22	4.36e-19		-0.0125556	1.52e-31	4.43e-28		-0.0069823	3.75e-06	0.0109454
IL13RA2	0.0009646	0.43032	1		0.0009198	0.418445	1		0.0004538	0.776151	1
IL15	-0.0126839	3.84e-29	1.12e-25		-0.0090752	6.89e-18	2.01e-14		-0.013445	7.32e-20	2.14e-16
IL15RA	-0.0033766	0.0034571	1		-0.0031132	0.0036671	1		-0.004184	0.0056222	1
IL16	-0.0064418	2.97e-08	8.67e-05		-0.0075431	2.95e-12	8.61e-09		-0.0042603	0.0049432	1
IL17A	-0.0056726	4.74e-07	0.0013845		-0.0049165	2.54e-06	0.0074302		-0.005778	8.7e-05	0.253907
IL17C	-0.0093011	4.65e-16	1.36e-12		-0.0081113	2.31e-14	6.75e-11		-0.0088295	3.85e-09	1.12e-05
IL17D	-0.0009262	0.441988	1		-0.0012637	0.25822	1		0.0002845	0.856774	1
IL17F	-0.0011604	0.301011	1		-0.0015817	0.128654	1		-0.0006259	0.669858	1
IL17RA	-0.001694	0.130851	1		-0.0018428	0.0767803	1		-0.0011568	0.429284	1
IL17RB	0.0152936	4.53e-38	1.32e-34		0.0161039	0	0		0.0063807	3.71e-05	0.108444
IL18	-0.0109032	1.21e-20	3.53e-17		-0.0113291	2.35e-25	6.87e-22		-0.0066845	1.18e-05	0.0343825
IL18BP	-0.0006443	0.589386	1		0.0016749	0.130495	1		-0.0064636	3.41e-05	0.0994494
IL18R1	-0.0172092	0	0		-0.0201482	0	0		-0.0095165	1.01e-09	2.95e-06
IL18RAP	0.0028089	0.0128412	1		0.002525	0.0161312	1		0.0022985	0.121375	1
IL19	-0.0161123	0	0		-0.0124713	4.26e-31	1.24e-27		-0.0184838	4.19e-34	1.22e-30
IL1A	-0.0019307	0.0850078	1		-0.0017518	0.0921242	1		-0.0011643	0.427277	1
IL1B	-0.0090556	9.68e-16	2.83e-12		-0.0085371	3.4e-16	9.94e-13		-0.0044222	0.0027264	1
IL1R1	0.0015715	0.173542	1		0.0038112	0.0003807	1		-0.0029151	0.0530547	1
IL1R2	-0.0053545	3.58e-06	0.0104391		-0.0082864	1.26e-14	3.68e-11		-0.0002329	0.876935	1
IL1RAP	0.0109676	5.07e-21	1.48e-17		0.0116341	6.03e-27	1.76e-23		0.0056879	0.0001867	0.545169
IL1RL1	-0.0068006	2.04e-08	5.97e-05		-0.0084141	7.95e-14	2.32e-10		-0.0055869	0.0004142	1
IL1RL2	0.009137	1.57e-14	4.59e-11		0.0053863	1.06e-06	0.0031088		0.006892	9.54e-06	0.0278599
IL1RN	-0.0202124	0	0		-0.021572	0	0		-0.0141022	2.52e-18	7.37e-15
IL2	-0.0010228	0.361502	1		-0.0008078	0.437311	1		-0.0008822	0.5475	1
IL20	-0.000906	0.419598	1		-0.0015122	0.14652	1		-0.0004113	0.779432	1
IL20RA	0.0008137	0.468053	1		0.0003153	0.761831	1		0.000503	0.731693	1
IL20RB	-0.0003571	0.770485	1		-0.0005038	0.65809	1		-0.0030268	0.0577468	1
IL21R	0.0006674	0.585314	1		0.0005401	0.634944	1		-0.000121	0.93948	1
IL22	-0.0101376	7.65e-16	2.23e-12		-0.0057969	7.16e-07	0.0020894		-0.0113574	4.46e-12	1.3e-08
IL22RA1	-0.0033501	0.0029474	1		-0.0036847	0.0004242	1		-0.0020646	0.161388	1
IL24	-0.0005817	0.603835	1		-0.0006092	0.558108	1		-0.0005398	0.712894	1
IL25	-0.0014861	0.225242	1		-0.0005695	0.617623	1		-0.0006285	0.693635	1
IL2RA	-0.0119866	8.38e-25	2.45e-21		-0.0092024	1.84e-17	5.38e-14		-0.0133302	1.95e-18	5.68e-15
IL2RB	0.0044663	7.05e-05	0.205921		0.003334	0.0013862	1		0.004023	0.0062177	1
IL2RG	0.0028751	0.0174167	1		0.0024316	0.0304882	1		0.0006149	0.69662	1
IL3	0.0001457	0.905204	1		0.0008444	0.458317	1		-0.0021255	0.181781	1
IL31	-0.0005394	0.659406	1		-0.0001434	0.899738	1		-0.0007953	0.61797	1
IL31RA	0.0001975	0.872668	1		-0.0002768	0.809179	1		-0.000893	0.577919	1
IL32	-0.0031957	0.0063964	1		-0.0020862	0.0556471	1		-0.0048679	0.0014168	1
IL33	-0.0002487	0.824752	1		-0.000963	0.355332	1		-0.001329	0.365702	1
IL34	0.0013985	0.214785	1		0.0005995	0.565835	1		5.87e-05	0.968381	1
IL36A	-0.0016776	0.170321	1		-0.0012837	0.259207	1		-0.0025533	0.109229	1
IL36G	-0.0045792	0.0002102	0.613755		-0.0041942	0.0002615	0.763691		-0.0051304	0.001439	1
IL3RA	0.0008343	0.473731	1		0.0011968	0.268045	1		0.000179	0.906507	1
IL4	-0.0016126	0.15024	1		-0.0016371	0.115461	1		-0.0013231	0.36695	1
IL4R	5.44e-05	0.962246	1		0.0012854	0.228761	1		-0.0023354	0.118155	1
IL5	0.0019104	0.0895322	1		0.0012339	0.237245	1		0.0020465	0.164489	1
IL5RA	-0.0080967	1.1e-12	3.21e-09		-0.0061608	5.81e-09	1.7e-05		-0.003891	0.0086118	1
IL6	-0.0239176	0	0		-0.0208905	0	0		-0.0199289	3.12e-37	9.12e-34
IL6R	-0.0009233	0.41587	1		-0.0004747	0.652092	1		-0.0022079	0.136588	1
IL6ST	-0.0036809	0.0012046	1		-0.0043999	3.06e-05	0.0892267		-0.0059631	6.17e-05	0.180283
IL7	-0.005433	1.26e-06	0.0036917		-0.0054631	1.62e-07	0.0004731		-0.0004463	0.759801	1
IL7R	0.0070763	1.4e-09	4.09e-06		0.0058919	5.66e-08	0.0001654		0.0046162	0.0024771	1
IL9	-0.0003543	0.77026	1		-0.0003947	0.726518	1		0.0001695	0.914652	1
ILKAP	-0.0056649	5.18e-07	0.0015125		-0.0063726	1.1e-09	3.21e-06		-0.0013994	0.344961	1
IMMT	-0.0116806	1.08e-20	3.16e-17		-0.01159	2.3e-23	6.72e-20		-0.0086012	1.41e-07	0.0004126
IMPA1	-0.0063299	1.35e-08	3.95e-05		-0.0068784	3.13e-11	9.13e-08		-0.0023694	0.105177	1
IMPACT	-0.0064168	1.18e-07	0.0003459		-0.0077332	6.6e-12	1.93e-08		-0.0002547	0.87188	1
IMPG1	0.0034595	0.004683	1		0.0021542	0.0581203	1		0.0027748	0.0821483	1
ING1	-0.0054667	1.25e-06	0.0036552		-0.0052805	4.39e-07	0.0012817		-0.0040641	0.0061009	1
INHBB	-0.0116677	2.05e-19	5.99e-16		-0.0086956	5.29e-13	1.54e-09		-0.0113262	1.88e-11	5.48e-08
INHBC	-0.018349	0	0		-0.0207968	0	0		-0.0114885	7.06e-13	2.06e-09
INPP1	-0.0033886	0.002512	1		-0.0040001	0.0001237	0.361206		5.92e-05	0.967826	1
INPP5D	-0.0077233	5.3e-10	1.55e-06		-0.0092419	1.32e-15	3.86e-12		-0.0015833	0.33038	1
INPP5J	0.0042708	0.0004437	1		0.0030483	0.0070132	1		0.0039401	0.0130164	1
INPPL1	-0.0041592	0.0002038	0.594968		-0.0060537	5.95e-09	1.74e-05		0.0008714	0.552195	1
INSL3	0.0027471	0.241217	1		0.0008921	0.682263	1		0.00447	0.143373	1
INSL4	-0.0035634	0.003268	1		-0.0025498	0.0235504	1		-0.0032699	0.038521	1
INSL5	-0.0152112	4.28e-33	1.25e-29		-0.0130453	2.07e-28	6.04e-25		-0.0106299	1.46e-10	4.27e-07
INSR	-0.0032431	0.0083645	1		-0.0019611	0.0864091	1		-0.0022981	0.151565	1
IPCEF1	-0.0086391	1.99e-14	5.81e-11		-0.0098956	4.04e-21	1.18e-17		-0.0036617	0.0134871	1
IQGAP2	-0.0050904	5.91e-06	0.0172646		-0.0060317	7.66e-09	2.24e-05		-0.0004576	0.755787	1
IRAG2	-0.0021417	0.0562868	1		-0.0028662	0.0058497	1		2.35e-05	0.987257	1
IRAK1	-0.0056955	4.26e-07	0.0012447		-0.0068655	5.02e-11	1.47e-07		-0.0003382	0.818508	1
IRAK4	-0.0066776	2.52e-09	7.36e-06		-0.0076781	1.72e-13	5.01e-10		-0.0018696	0.199935	1
ISLR2	-0.0075248	4.65e-11	1.36e-07		-0.0062745	3.2e-09	9.35e-06		-0.0045159	0.0026961	1
ISM1	-0.0099804	8.19e-18	2.39e-14		-0.0112675	1.67e-25	4.88e-22		-0.0079139	1.64e-07	0.0004801
ISM2	0.0011893	0.321515	1		0.0001125	0.919728	1		0.0008371	0.593123	1
IST1	-0.0084624	2.89e-12	8.43e-09		-0.0090438	9.98e-16	2.91e-12		-0.0032669	0.0391377	1
ITGA11	0.0076712	4.89e-11	1.43e-07		0.0079964	1.72e-13	5.03e-10		0.0050096	0.0009743	1
ITGA2	0.0010146	0.425642	1		-0.0001898	0.872715	1		0.0045576	0.0059877	1
ITGA5	-0.0183399	0	0		-0.0188168	0	0		-0.0132094	1.68e-17	4.92e-14
ITGA6	-0.0018899	0.0913511	1		-0.002762	0.0079811	1		0.0017205	0.237658	1
ITGAL	-0.0059974	1.37e-06	0.0040093		-0.0050357	1.3e-05	0.0380126		-0.0048871	0.0025319	1
ITGAM	-0.0059046	3.59e-07	0.0010486		-0.0060467	1.99e-08	5.82e-05		-0.0021012	0.165297	1
ITGAV	0.0061784	3.19e-07	0.0009319		0.0063524	1.63e-08	4.76e-05		0.0062806	6.8e-05	0.198494
ITGAX	-0.0021469	0.0769383	1		-0.0014787	0.190284	1		-0.0024028	0.128941	1
ITGB1	-0.0025646	0.0279088	1		-0.0024981	0.0208091	1		-0.0017764	0.244357	1
ITGB1BP1	0.0013434	0.2325	1		0.0009878	0.344384	1		0.0021784	0.139218	1
ITGB1BP2	-0.0063262	1.74e-08	5.08e-05		-0.0068292	5.22e-11	1.52e-07		-0.0020351	0.166736	1
ITGB2	-0.0094632	1.18e-15	3.43e-12		-0.0100591	5.63e-20	1.64e-16		-0.0052061	0.0007264	1
ITGB5	-0.0064832	1.5e-08	4.37e-05		-0.0060765	1.17e-08	3.43e-05		-0.0025254	0.0912442	1
ITGB6	0.0078703	7.18e-11	2.1e-07		0.0053073	2.18e-06	0.0063745		0.0104442	3.85e-11	1.12e-07
ITGB7	0.0009596	0.387697	1		0.0004797	0.642721	1		0.001706	0.239114	1
ITGBL1	-0.0069609	5.49e-08	0.0001604		-0.0071602	1.87e-09	5.45e-06		-0.004909	0.0033436	1
ITIH1	-7e-05	0.953507	1		-0.0009819	0.379357	1		0.0025953	0.0975894	1
ITIH3	-0.0046151	0.0001554	0.453653		-0.0015329	0.175769	1		-0.0110605	3.94e-12	1.15e-08
ITIH4	-0.0100328	2.58e-15	7.52e-12		-0.0094764	9.34e-16	2.73e-12		-0.0065053	8.45e-05	0.246697
ITIH5	0.0006701	0.578179	1		-1.62e-05	0.988491	1		0.0026889	0.087125	1
ITM2A	0.0013938	0.215065	1		0.001585	0.129585	1		0.001523	0.297993	1
ITPA	-0.0066083	7.68e-08	0.0002242		-0.0068512	2.16e-09	6.31e-06		-0.0022911	0.152312	1
ITPR1	-0.0063939	1.78e-07	0.0005203		-0.0068607	1.7e-09	4.96e-06		-0.0038965	0.0149768	1
ITPRIP	0.0028298	0.0211986	1		0.002711	0.017529	1		0.0005732	0.720535	1
IVD	-0.0029727	0.0081506	1		-0.0031242	0.0026928	1		-0.0029367	0.0464712	1
IZUMO1	0.0014036	0.254605	1		0.0019538	0.0884674	1		0.0010927	0.495557	1
JAM2	0.0012461	0.289836	1		0.000997	0.362745	1		0.0005427	0.724009	1
JAM3	-0.0104761	1.05e-17	3.06e-14		-0.0090894	1.33e-15	3.88e-12		-0.0061821	0.0001038	0.303195
JCHAIN	-0.0038698	0.0006393	1		-0.0022291	0.0340346	1		-0.0027426	0.0643955	1
JMJD1C	0.0013842	0.258097	1		0.0008275	0.467696	1		-0.0006133	0.700216	1
JPT2	0.0010437	0.385734	1		0.0005211	0.641326	1		0.0018599	0.236486	1
JUN	-0.0006745	0.548474	1		-0.0012609	0.226723	1		-0.001995	0.174962	1
KAZALD1	0.0061126	9.63e-08	0.0002813		0.0043711	4.07e-05	0.118702		0.004475	0.0028572	1
KAZN	-0.0058933	1.06e-06	0.003092		-0.0070562	3.24e-10	9.45e-07		-0.0012563	0.425622	1
KCNC4	-0.0004795	0.695153	1		-4.83e-05	0.966092	1		-0.0005521	0.729483	1
KCNH2	0.0004545	0.70934	1		0.0005661	0.617636	1		0.0007746	0.627187	1
KCNIP4	-0.0012618	0.261799	1		-0.0009238	0.375296	1		-0.0013665	0.354563	1
KCTD5	-0.0118654	2.1e-21	6.13e-18		-0.0132935	2.42e-30	7.07e-27		-0.0055947	0.000594	1
KDM3A	0.0046223	0.0001669	0.487384		0.0044925	8.34e-05	0.243483		1.19e-05	0.994081	1
KDR	-0.0034475	0.002474	1		-0.0048281	5.22e-06	0.0152404		-0.0006571	0.658616	1
KEL	0.0022249	0.056809	1		0.0010989	0.309991	1		0.004738	0.0020004	1
KHDC3L	8.85e-05	0.94231	1		-0.0001302	0.908984	1		0.0010547	0.507571	1
KHK	-0.0143083	1.68e-29	4.91e-26		-0.0165935	0	0		-0.0051512	0.0019194	1
KIAA0319	-0.0068254	3.15e-08	9.19e-05		-0.0053458	3.14e-06	0.0091818		-0.0051897	0.0012473	1
KIAA1549	1.07e-05	0.99294	1		0.0011442	0.310866	1		-0.003069	0.0524629	1
KIAA1549L	0.0021142	0.0817245	1		0.0024743	0.0285053	1		0.0019684	0.213847	1
KIAA2013	0.0013057	0.278876	1		0.0012529	0.263576	1		-0.000337	0.830343	1
KIF1C	-0.0038797	0.0016426	1		-0.0045413	7.55e-05	0.220384		-0.0011856	0.459812	1
KIF20B	-0.000405	0.740582	1		-0.0003796	0.738441	1		0.0027225	0.0880507	1
KIF22	-0.0055913	5.94e-06	0.0173403		-0.0056348	9.48e-07	0.0027688		-0.002147	0.181578	1
KIFBP	-0.0063543	1.31e-08	3.84e-05		-0.0072387	3.2e-12	9.35e-09		-0.0016719	0.253311	1
KIR2DL2	9.64e-05	0.937158	1		0.0009747	0.391238	1		-0.0022541	0.157685	1
KIR2DL3	0.0006903	0.54576	1		0.0022787	0.0317161	1		-0.0029273	0.0503865	1
KIR2DS4	-0.0012886	0.284324	1		-0.0011548	0.301981	1		0.0011131	0.478716	1
KIR3DL1	-0.0040618	0.0003144	0.918132		-0.0035495	0.0006954	1		-0.0034094	0.0208976	1
KIR3DL2	0.0024616	0.0442148	1		0.0025	0.0281477	1		0.0030449	0.055808	1
KIRREL1	0.0003939	0.747449	1		0.0009569	0.399924	1		0.000771	0.629037	1
KIRREL2	-9.24e-05	0.935731	1		0.0010169	0.338075	1		-0.0040463	0.0071285	1
KIT	0.007533	1.51e-10	4.41e-07		0.0072079	3.96e-11	1.16e-07		0.0088545	8.36e-09	2.44e-05
KITLG	0.012661	1.57e-27	4.57e-24		0.0108298	1.29e-23	3.76e-20		0.0091283	2.19e-09	6.39e-06
KLB	0.0050469	9.67e-06	0.0282283		0.0058756	2.71e-08	7.91e-05		0.0010341	0.489871	1
KLF4	-0.0068464	3.58e-08	0.0001046		-0.0070255	1.17e-09	3.42e-06		-0.003408	0.0355849	1
KLHL41	0.0049926	4.93e-05	0.143997		0.004885	1.95e-05	0.0568168		0.0024712	0.123705	1
KLK1	-0.0023911	0.0339159	1		-0.0018817	0.0727937	1		-0.0023661	0.108022	1
KLK10	-0.0042739	0.0001616	0.471866		-0.0038322	0.0002777	0.810809		-0.0051457	0.0004995	1
KLK11	-0.0023145	0.0427814	1		-0.0006798	0.522367	1		-0.0045089	0.0025077	1
KLK12	-0.0035161	0.0018126	1		-0.0022972	0.0281642	1		-0.0022687	0.124261	1
KLK13	-0.010539	2.51e-19	7.34e-16		-0.0095919	1.41e-18	4.11e-15		-0.0073582	1.48e-06	0.0043095
KLK14	-0.0161993	0	0		-0.0163538	0	0		-0.0130319	4.87e-18	1.42e-14
KLK15	-0.0034864	0.0040951	1		-0.0039666	0.0004398	1		-0.0039177	0.0133773	1
KLK3	0.0040956	0.0503477	1		0.0040603	0.0370306	1		0.0030871	0.25868	1
KLK4	-0.004386	0.0002371	0.692317		-0.0021839	0.0492547	1		-0.0043348	0.0053549	1
KLK6	-0.0097145	1.21e-17	3.53e-14		-0.0095853	1.2e-19	3.51e-16		-0.0039114	0.0084128	1
KLK7	-0.0138419	1.04e-27	3.03e-24		-0.0162305	0	0		-0.0100475	1.29e-09	3.76e-06
KLK8	-0.0130356	2.46e-28	7.19e-25		-0.0131811	3.32e-33	9.71e-30		-0.0097528	2.38e-10	6.94e-07
KLKB1	-0.0028367	0.0248483	1		-0.0054639	3.39e-06	0.009909		0.0026043	0.114586	1
KLRB1	0.0075183	8.84e-11	2.58e-07		0.0068035	2.78e-10	8.12e-07		0.0012274	0.416986	1
KLRC1	0.0023965	0.0500906	1		0.0023943	0.035198	1		0.0006378	0.689441	1
KLRD1	-0.005502	2.2e-06	0.0064117		-0.0058545	6.06e-08	0.0001768		-0.0042665	0.0048779	1
KLRF1	0.0004388	0.728169	1		-0.0007491	0.523499	1		-0.0009763	0.552883	1
KLRK1	-0.0004565	0.705983	1		-0.0007256	0.518985	1		-0.0047648	0.0025154	1
KRT14	-0.0011511	0.313943	1		-0.0003382	0.749239	1		-0.0021079	0.159059	1
KRT17	-0.0003002	0.805647	1		-0.0012569	0.268502	1		0.0004784	0.763196	1
KRT18	-0.014187	1.93e-30	5.63e-27		-0.0169262	0	0		-0.0095624	3.61e-09	1.05e-05
KRT19	-0.0061048	1.55e-07	0.0004522		-0.0044074	4.66e-05	0.136033		-0.0068813	5.53e-06	0.0161595
KRT5	-0.0028796	0.0152318	1		-0.0037831	0.0005801	1		-0.0005439	0.726972	1
KRT6C	0.001668	0.173098	1		0.0011791	0.300977	1		8.91e-05	0.955406	1
KRT8	-0.0075908	1.95e-09	5.69e-06		-0.0090209	1.64e-14	4.78e-11		-0.0070176	2.12e-05	0.0618845
KYAT1	-0.0084427	4.64e-14	1.35e-10		-0.0098464	2.62e-21	7.65e-18		-0.0018617	0.204213	1
KYNU	-0.0153059	5.9e-39	1.72e-35		-0.018404	0	0		-0.0066962	1.21e-05	0.0353951
L1CAM	-0.007326	2.1e-10	6.12e-07		-0.0067314	3.5e-10	1.02e-06		-0.0023109	0.124832	1
L3HYPDH	-0.0110364	5.16e-20	1.51e-16		-0.0107831	6.46e-22	1.89e-18		-0.0063166	5.99e-05	0.174968
LACRT	0.0020669	0.0919056	1		0.0012841	0.259967	1		0.0009558	0.550144	1
LACTB2	-0.0085309	2e-14	5.84e-11		-0.0091173	1.26e-18	3.68e-15		-0.0031903	0.0289397	1
LAG3	-0.000967	0.385649	1		-0.0004835	0.640648	1		-0.0017266	0.236624	1
LAIR1	-0.0153893	4.67e-37	1.36e-33		-0.0125641	6.75e-29	1.97e-25		-0.0135476	8.34e-18	2.44e-14
LAIR2	-0.0066007	4.03e-09	1.18e-05		-0.006222	2.42e-09	7.07e-06		-0.0073408	6.12e-07	0.0017868
LAMA1	0.0014698	0.228536	1		0.0021185	0.0622914	1		0.0004601	0.772089	1
LAMA4	-0.0133118	4.71e-32	1.38e-28		-0.0127961	4.22e-34	1.23e-30		-0.0080051	5.64e-08	0.0001646
LAMB1	-0.0027196	0.028725	1		-0.0041837	0.0002963	0.865259		0.0003154	0.846179	1
LAMP1	-0.0046208	0.0001765	0.515292		-0.006095	1.03e-07	0.0003021		-0.0007802	0.628437	1
LAMP2	-0.0138607	1e-30	2.92e-27		-0.0154642	0	0		-0.0065436	2.98e-05	0.0870259
LAMP3	-0.0012085	0.346256	1		0.0001706	0.886337	1		-0.0021734	0.193777	1
LAMTOR5	-0.0016626	0.168003	1		-0.000967	0.388298	1		-0.0001307	0.933791	1
LAP3	-0.0075254	2.51e-11	7.33e-08		-0.0085003	4.49e-16	1.31e-12		-0.0034718	0.0186631	1
LARP1	-0.0039478	0.0010643	1		-0.0048874	1.3e-05	0.0379827		0.0004155	0.791712	1
LAT	-0.0079338	1.22e-12	3.56e-09		-0.0085313	2.14e-16	6.25e-13		-0.0031659	0.0297923	1
LAT2	-0.0060957	5.85e-08	0.0001707		-0.0074458	1.01e-12	2.94e-09		-0.0004326	0.768776	1
LATS1	-0.0078385	2.01e-10	5.87e-07		-0.0088848	8.91e-15	2.6e-11		-0.0014992	0.350659	1
LAYN	-0.0004203	0.726786	1		0.0022941	0.0402332	1		-0.0052585	0.0008689	1
LBP	-0.0159938	0	0		-0.0150354	0	0		-0.0121714	3.46e-16	1.01e-12
LBR	-0.0111142	8.92e-23	2.6e-19		-0.011489	9.72e-28	2.84e-24		-0.0063409	1.78e-05	0.0520812
LCAT	-0.0164156	3.24e-38	9.46e-35		-0.0200015	0	0		-0.0074021	8.2e-06	0.0239298
LCN15	-0.0040978	0.0007594	1		-0.0025768	0.0227844	1		-0.0046741	0.0032479	1
LCN2	-0.0016481	0.164134	1		0.000547	0.618625	1		-0.0062176	5.92e-05	0.172832
LCP1	-0.0068031	2.22e-08	6.49e-05		-0.007643	1.42e-11	4.15e-08		-0.0029294	0.0651895	1
LDLR	-0.0096847	1.11e-15	3.24e-12		-0.0148739	0	0		-0.0017774	0.26024	1
LDLRAP1	-0.0076767	2.11e-10	6.17e-07		-0.0081658	3.64e-13	1.06e-09		-0.0032808	0.0375204	1
LECT2	-0.0128331	2.15e-20	6.28e-17		-0.0119928	1.45e-20	4.22e-17		-0.008319	4.39e-06	0.0128156
LEFTY2	-0.0019329	0.104465	1		-0.0026563	0.0165148	1		-0.0001803	0.907532	1
LEG1	-0.0124073	4.04e-23	1.18e-19		-0.0081476	3.15e-12	9.19e-09		-0.016502	3.77e-24	1.1e-20
LELP1	0.0004073	0.739178	1		0.0005934	0.601696	1		-0.000506	0.751235	1
LEO1	-0.0046683	0.0001093	0.319069		-0.0051341	4.73e-06	0.0138202		-0.0027224	0.0838196	1
LEP	-0.0459749	0	0		-0.0522198	0	0		-0.024624	6.84e-30	2e-26
LEPR	0.0027486	0.0200946	1		0.0039828	0.0002849	0.831834		-0.0009095	0.5569	1
LETM1	-0.0105172	5.05e-18	1.48e-14		-0.0099639	1.19e-18	3.48e-15		-0.006621	3.02e-05	0.088065
LGALS1	-0.0119767	6.22e-24	1.82e-20		-0.0126755	1.26e-30	3.68e-27		-0.0062805	5.39e-05	0.157443
LGALS3	-0.0053293	6.91e-06	0.0201791		-0.0052003	2.34e-06	0.006847		-0.0038833	0.0121672	1
LGALS3BP	-0.0182847	0	0		-0.01927	0	0		-0.0127618	4.82e-15	1.41e-11
LGALS4	-0.015367	1.49e-35	4.36e-32		-0.0143967	5.19e-36	1.52e-32		-0.0132502	1.76e-16	5.15e-13
LGALS7_LGALS7B	-0.0041212	0.0004381	1		-0.0037107	0.0006717	1		-0.0026443	0.0837559	1
LGALS8	-0.0088114	3.1e-15	9.06e-12		-0.0095652	3.49e-20	1.02e-16		-0.0029095	0.0461721	1
LGALS9	-0.0159225	7.08e-37	2.07e-33		-0.016075	0	0		-0.0112012	7.97e-12	2.33e-08
LGMN	-0.0163075	0	0		-0.0148189	0	0		-0.0112956	3.19e-14	9.3e-11
LHB	4.7e-05	0.96789	1		-0.0009651	0.372885	1		-0.001722	0.259572	1
LHPP	-0.0051787	5.22e-06	0.0152458		-0.0059384	1.96e-08	5.73e-05		-0.0005016	0.735289	1
LIF	-0.0056764	4.73e-07	0.0013822		-0.0049791	1.86e-06	0.0054406		-0.0053024	0.0003386	0.988759
LIFR	0.0013776	0.228159	1		0.0011533	0.278066	1		-0.0028529	0.05519	1
LILRA2	-0.0048932	2.85e-05	0.0831314		-0.0064658	2.58e-09	7.53e-06		-0.0030283	0.0471966	1
LILRA3	-0.0018574	0.122395	1		-0.0015254	0.172658	1		-0.0005223	0.739395	1
LILRA4	-0.0006681	0.584466	1		-0.0007842	0.490551	1		0.000208	0.895944	1
LILRA5	-0.0249298	0	0		-0.0237606	0	0		-0.018477	3.21e-33	9.37e-30
LILRA6	-0.0013421	0.265704	1		-0.0014754	0.188435	1		-0.0027648	0.0790957	1
LILRB1	-0.0077229	2.2e-11	6.42e-08		-0.0087122	4.36e-16	1.27e-12		-0.005739	0.0001388	0.405419
LILRB2	-0.0036686	0.0013311	1		-0.0039528	0.0001971	0.57556		-0.0030317	0.042138	1
LILRB4	-0.0092852	1.13e-14	3.3e-11		-0.0075604	1.22e-11	3.57e-08		-0.009818	4.34e-10	1.27e-06
LILRB5	-0.0035941	0.0012504	1		-0.0042216	4.49e-05	0.131109		-0.0036833	0.0112665	1
LIPF	-0.0056141	7.56e-06	0.0220701		-0.0048547	3.14e-05	0.0915708		0.0001084	0.947286	1
LMNB1	-0.0049475	4.92e-05	0.143806		-0.0056032	7.58e-07	0.0022137		-0.0029901	0.0603914	1
LMNB2	-0.0110808	6.35e-18	1.85e-14		-0.0102951	6.65e-18	1.94e-14		-0.0055263	0.0009683	1
LMOD1	0.0018179	0.164582	1		0.0043663	0.0003303	0.964357		-0.0001174	0.945173	1
LMOD2	0.0027749	0.0234296	1		0.0024322	0.032568	1		0.0017122	0.283881	1
LONP1	-0.0126694	8.09e-25	2.36e-21		-0.0130697	3.58e-30	1.05e-26		-0.0075824	2.53e-06	0.0074006
LPA	-0.0038395	0.0016928	1		-0.0040943	0.0003163	0.923702		-0.0016934	0.288328	1
LPCAT2	-0.0038476	0.0006127	1		-0.0030621	0.0033484	1		-0.0054316	0.0002199	0.642019
LPL	0.0048802	0.0002119	0.618878		0.0092511	3.83e-14	1.12e-10		0.0008168	0.635866	1
LPO	-0.0196539	0	0		-0.0176099	0	0		-0.0187223	4.64e-35	1.35e-31
LPP	-0.0044461	0.0002753	0.803854		-0.0052555	3.86e-06	0.0112809		-0.0011487	0.470298	1
LRCH4	-0.0083377	1.93e-11	5.63e-08		-0.0102698	6.58e-19	1.92e-15		-0.002267	0.161034	1
LRFN2	-0.0004284	0.725081	1		-0.0006672	0.555971	1		0.0001118	0.944057	1
LRG1	-0.0092768	1.98e-13	5.79e-10		-0.0054316	3.71e-06	0.0108307		-0.0122712	8.97e-14	2.62e-10
LRIG1	-0.0110473	7.35e-22	2.15e-18		-0.008392	4.48e-15	1.31e-11		-0.0083651	2.43e-08	7.08e-05
LRIG3	-0.0024459	0.0496562	1		-0.0016989	0.142581	1		-0.005108	0.0016573	1
LRP1	-0.0036867	0.0015924	1		-0.0026764	0.0136494	1		-0.0040818	0.0075713	1
LRP11	-0.0056218	1.19e-06	0.0034836		-0.0060454	1.84e-08	5.37e-05		-0.006787	7.53e-06	0.0219988
LRP2	-0.0029618	0.0150484	1		-0.0022708	0.0450751	1		-0.0026416	0.0973975	1
LRP2BP	0.0005501	0.652032	1		0.0009013	0.426992	1		-0.0011939	0.454328	1
LRPAP1	-0.0094633	4.02e-17	1.17e-13		-0.0103053	7.05e-23	2.06e-19		-0.0053958	0.0002403	0.701781
LRRC25	-0.0027718	0.016915	1		-0.0022374	0.0380187	1		-0.003261	0.0318058	1
LRRC37A2	-0.0021541	0.0749228	1		-0.0024701	0.0280178	1		-0.0015765	0.318129	1
LRRC38	-0.0018895	0.130305	1		0.0002081	0.857808	1		-0.0009802	0.548518	1
LRRC59	-0.0076186	2.57e-10	7.5e-07		-0.007691	6.8e-12	1.99e-08		-0.0020274	0.197687	1
LRRFIP1	-0.0040604	0.000784	1		-0.0052292	3.26e-06	0.0095063		-0.000873	0.579878	1
LRRN1	0.0108425	4.15e-21	1.21e-17		0.0066884	3.69e-10	1.08e-06		0.0104891	3.18e-12	9.28e-09
LRTM1	0.0007338	0.547154	1		0.0010193	0.368624	1		-0.0008457	0.595811	1
LRTM2	-0.0083292	4e-11	1.17e-07		-0.0091396	6.48e-15	1.89e-11		-0.0042845	0.0092549	1
LSM1	-0.0004836	0.667389	1		0.0002315	0.824613	1		0.0007722	0.600193	1
LSM8	0.0021008	0.0846225	1		0.0008021	0.479019	1		0.0021529	0.175268	1
LSP1	-0.0056452	1.22e-06	0.0035559		-0.0067859	3.56e-10	1.04e-06		-0.0024428	0.10673	1
LTA	0.0029928	0.0094805	1		0.002393	0.025737	1		0.0007754	0.605602	1
LTA4H	0.0002392	0.8355	1		0.0015758	0.141627	1		0.0010761	0.473935	1
LTB	0.0003057	0.801418	1		0.0001848	0.870053	1		-0.0009488	0.549483	1
LTBP2	-0.0034599	0.0099932	1		0.0001329	0.915163	1		-0.0040092	0.0221672	1
LTBP3	-0.009605	3.59e-16	1.05e-12		-0.0097741	4.06e-19	1.18e-15		-0.0065188	2.4e-05	0.0700666
LTBR	-0.0004457	0.701394	1		0.001254	0.246244	1		-0.0031557	0.0371218	1
LTO1	0.0011384	0.310022	1		0.0012182	0.24166	1		0.001049	0.474606	1
LUZP2	-0.0038556	0.0017003	1		-0.0033127	0.0037207	1		-0.005141	0.0013363	1
LXN	0.0018335	0.102726	1		0.0023763	0.0229058	1		0.0026448	0.0721771	1
LY6D	-0.0130172	1.15e-29	3.35e-26		-0.0120579	2.02e-29	5.89e-26		-0.0123479	1.93e-16	5.65e-13
LY75	0.0040614	0.0003265	0.953262		0.0025589	0.0149309	1		0.0007884	0.59205	1
LY9	-0.0045548	6.92e-05	0.202139		-0.0045653	1.78e-05	0.0520007		-0.0052109	0.0004891	1
LY96	-0.0119303	1.8e-25	5.26e-22		-0.0111707	7.94e-26	2.32e-22		-0.006659	9.19e-06	0.0268289
LYAR	-0.0024227	0.0315467	1		-0.0030533	0.0035156	1		-0.0016745	0.256368	1
LYN	-0.0072335	1.12e-10	3.28e-07		-0.008037	1.24e-14	3.62e-11		-0.0016917	0.249296	1
LYPD1	0.0027239	0.0153771	1		0.0024297	0.0196646	1		0.0022538	0.126662	1
LYPD3	-0.0004617	0.683492	1		-0.0010947	0.298754	1		-0.0009048	0.540359	1
LYPD8	-0.0047272	2.99e-05	0.0871747		-0.0051613	9.13e-07	0.0026661		-0.0031014	0.0364718	1
LYPLA2	-0.0002267	0.852946	1		0.0003906	0.731181	1		-0.001728	0.278976	1
LYSMD3	0.0006448	0.597416	1		-0.0006857	0.545968	1		0.0004542	0.776129	1
LYVE1	-0.0022064	0.0735182	1		-0.0021875	0.0563692	1		-0.0028068	0.0808729	1
LYZL2	-0.0008029	0.544477	1		-0.0021435	0.0821672	1		0.000437	0.799891	1
LZTFL1	-0.008161	2.23e-11	6.52e-08		-0.0093923	1.24e-16	3.63e-13		-0.0025596	0.107214	1
M6PR	-0.0026163	0.0318145	1		-0.0018994	0.0937541	1		-0.0013365	0.401635	1
MAD1L1	-0.0115494	3.7e-23	1.08e-19		-0.0109204	6.24e-24	1.82e-20		-0.0087797	1.01e-08	2.95e-05
MAEA	0.0004444	0.693095	1		-0.0002536	0.808283	1		0.0012641	0.391173	1
MAG	0.0002343	0.847514	1		0.0003812	0.736586	1		0.0016627	0.296846	1
MAGEA3	-0.0005859	0.629141	1		-0.0008692	0.441091	1		0.0002932	0.852912	1
MAGED1	-0.0053974	1.63e-06	0.0047484		-0.0055464	1.11e-07	0.0003246		-0.0039675	0.0071067	1
MAMDC2	-0.004842	0.0001073	0.313177		-0.0035547	0.0022371	1		-0.0015049	0.35659	1
MAMDC4	-0.0099342	5.97e-14	1.74e-10		-0.0113476	2.7e-20	7.87e-17		-0.0051241	0.0029945	1
MAN1A2	-0.0037584	0.0032096	1		-0.0041754	0.0004305	1		-0.0044643	0.0074253	1
MAN2B2	-0.0047605	0.0001193	0.348282		-0.0063111	4.16e-08	0.0001215		0.0013045	0.419457	1
MANEAL	-0.0018317	0.134404	1		-0.0021701	0.0567536	1		-0.0011646	0.464576	1
MANF	-0.007843	2.14e-12	6.26e-09		-0.0082166	2.57e-15	7.5e-12		-0.0031717	0.0294256	1
MANSC1	0.0064081	1.69e-08	4.94e-05		0.0077728	1.91e-13	5.58e-10		0.0009332	0.529299	1
MANSC4	0.0007395	0.553943	1		0.0029694	0.0106818	1		-0.0021838	0.17927	1
MAP1LC3A	0.002871	0.0189076	1		0.0023458	0.0390497	1		0.0030762	0.053919	1
MAP1LC3B2	1.52e-05	0.990036	1		-5.95e-05	0.958257	1		-0.0002193	0.890148	1
MAP2	-0.0065041	7.26e-08	0.0002121		-0.006539	5.77e-09	1.69e-05		-0.0012526	0.426303	1
MAP2K1	-0.008195	1.34e-11	3.93e-08		-0.0089647	1.71e-15	4.99e-12		-0.0019451	0.219006	1
MAP2K6	-0.0055425	7.35e-07	0.0021452		-0.0065794	2.6e-10	7.6e-07		-0.0002387	0.869871	1
MAP3K5	-0.0009932	0.37793	1		-0.0026721	0.0106176	1		0.0021826	0.138911	1
MAP4K5	-0.006622	3.02e-09	8.81e-06		-0.007745	8.53e-14	2.49e-10		-0.001462	0.318733	1
MAPK13	-0.0036874	0.0026356	1		-0.0011964	0.29459	1		-0.0046181	0.0038008	1
MAPK9	-0.0048531	1.7e-05	0.0497054		-0.0055931	9.86e-08	0.0002878		0.0002921	0.842371	1
MAPKAPK2	-0.0019695	0.104821	1		-0.0027676	0.0142663	1		0.000328	0.835894	1
MAPRE3	0.0038194	0.0019118	1		0.0025501	0.0260154	1		0.0013907	0.38522	1
MAPT	-0.0016187	0.149784	1		-0.0009352	0.369201	1		-0.0016807	0.254618	1
MARCO	-0.014926	4.34e-38	1.27e-34		-0.0153286	0	0		-0.0123272	4.19e-16	1.22e-12
MARS1	-0.0074781	9.49e-10	2.77e-06		-0.0086583	2.61e-14	7.62e-11		-0.0021213	0.182726	1
MASP1	-0.0024389	0.0312962	1		-0.0048003	5.14e-06	0.0150116		0.0004544	0.759967	1
MATN2	-0.011462	3.34e-23	9.75e-20		-0.009893	3.55e-20	1.04e-16		-0.0088571	4.18e-09	1.22e-05
MATN3	0.0065949	7.85e-09	2.29e-05		0.0085336	9.2e-16	2.69e-12		0.0025746	0.0860083	1
MAVS	-0.0056626	5.05e-07	0.0014755		-0.0065691	3.42e-10	9.98e-07		-0.0006761	0.646887	1
MAX	-0.0083772	1.21e-13	3.54e-10		-0.0086527	1.38e-16	4.03e-13		-0.0048582	0.0010567	1
MB	0.0040407	0.0017218	1		0.0061057	3.41e-07	0.0009961		0.003961	0.0185423	1
MBL2	0.0011972	0.329846	1		0.00198	0.0829252	1		-5.57e-05	0.972307	1
MCAM	0.0061055	2.95e-07	0.0008621		0.0063036	1.16e-08	3.4e-05		0.004151	0.0076476	1
MCEE	-0.003369	0.0050822	1		-0.0033016	0.0031484	1		-0.0024189	0.123179	1
MCEMP1	-0.0069178	1.83e-08	5.33e-05		-0.0071145	4.85e-10	1.41e-06		-0.0033194	0.0382722	1
MCFD2	-0.0092222	1.53e-16	4.47e-13		-0.0087683	2.72e-17	7.95e-14		-0.0057369	8.82e-05	0.257453
MCTS1	0.0017374	0.150569	1		-0.0007754	0.490054	1		0.0045303	0.0040904	1
MDGA1	0.0037255	0.0012351	1		0.0029952	0.0051975	1		0.0028701	0.0577949	1
MDH1	-0.0084303	4.13e-12	1.21e-08		-0.0096505	1.45e-17	4.24e-14		-0.0024838	0.11808	1
MDK	-0.0118396	3.19e-25	9.32e-22		-0.0096931	6.95e-20	2.03e-16		-0.0098878	3.29e-11	9.6e-08
MDM1	-0.0002305	0.850006	1		-0.0008366	0.460488	1		0.0015815	0.321126	1
MECR	-0.012304	1.33e-23	3.87e-20		-0.0118718	2.74e-25	7.99e-22		-0.0080537	5.44e-07	0.0015886
MED18	-0.0069029	9.03e-10	2.64e-06		-0.0076543	2.54e-13	7.41e-10		-0.0019757	0.180661	1
MED21	0.0005345	0.661497	1		-0.0005888	0.604458	1		-0.0014035	0.377076	1
MEGF10	0.0044745	7.73e-05	0.225809		0.0047021	8.06e-06	0.0235351		0.0043262	0.0033338	1
MEGF11	-0.0015408	0.207919	1		-0.0019057	0.0943395	1		-0.000963	0.545348	1
MEGF9	-0.0104057	1.3e-19	3.79e-16		-0.0127704	4.77e-33	1.39e-29		-0.0025336	0.091043	1
MELTF	0.0016425	0.179027	1		0.0012884	0.25718	1		5.1e-05	0.97451	1
MENT	-0.0014939	0.266283	1		0.0011558	0.355155	1		-0.0054609	0.0018016	1
MEP1A	-0.0046369	0.000236	0.68919		-0.0073321	3.95e-10	1.15e-06		-0.0005651	0.731485	1
MEP1B	0.0005594	0.620245	1		-0.0032416	0.0019791	1		0.0047242	0.0013922	1
MEPE	0.0136954	1.35e-30	3.94e-27		0.0121796	4.4e-28	1.28e-24		0.0147316	2.16e-21	6.3e-18
MERTK	0.0035292	0.0027163	1		0.0031851	0.0036215	1		0.002519	0.100829	1
MESD	-0.0082171	2.33e-13	6.82e-10		-0.0087644	3.83e-17	1.12e-13		-0.0024775	0.0905812	1
MET	0.0091321	8.07e-15	2.36e-11		0.009063	1.07e-16	3.13e-13		0.0070767	4.06e-06	0.0118621
METAP1	0.0012213	0.277129	1		0.0001129	0.913664	1		0.0015959	0.279306	1
METAP1D	-0.0110568	6.27e-23	1.83e-19		-0.0115832	1.17e-28	3.41e-25		-0.0062103	2.12e-05	0.0618387
METAP2	-0.0090135	8.66e-16	2.53e-12		-0.0105776	3.46e-24	1.01e-20		-0.002633	0.0716023	1
MFAP3	0.0002968	0.791078	1		-0.0003237	0.755259	1		-3.03e-05	0.983522	1
MFAP3L	0.0021	0.0849613	1		0.0015596	0.169012	1		0.0023156	0.146473	1
MFAP4	-0.0043105	0.0007528	1		-0.0052884	8.8e-06	0.0257005		-0.0017532	0.292593	1
MFAP5	-0.0077696	4.98e-11	1.45e-07		-0.0092954	2.56e-17	7.48e-14		-0.0024686	0.109683	1
MFGE8	-0.0136183	6.03e-32	1.76e-28		-0.0151207	0	0		-0.0067884	7.15e-06	0.0208731
MGLL	-0.0055289	7.39e-07	0.002157		-0.0063514	9.75e-10	2.85e-06		-0.0005892	0.685826	1
MGMT	-0.0060768	5.58e-08	0.000163		-0.0064635	5.23e-10	1.53e-06		-0.0010891	0.45459	1
MIA	0.0009626	0.387527	1		0.0004803	0.643083	1		0.0017099	0.239705	1
MICALL2	-0.0006973	0.567387	1		-0.0009115	0.421519	1		0.0009987	0.531175	1
MICB_MICA	0.0001465	0.896199	1		0.0002978	0.775484	1		-0.0001125	0.938639	1
MIF	-0.0099122	1.18e-18	3.43e-15		-0.0106312	2.29e-24	6.68e-21		-0.0032675	0.0260327	1
MILR1	-0.0043857	0.0001302	0.380211		-0.0039432	0.0002093	0.611025		-0.0040809	0.0065102	1
MINDY1	-0.0048582	5.57e-05	0.162771		-0.0053608	1.71e-06	0.0049929		-0.001101	0.483824	1
MINK1	-0.00773	1.41e-10	4.12e-07		-0.0080497	6.67e-13	1.95e-09		-0.0028764	0.067079	1
MITD1	-0.0071941	1.18e-10	3.45e-07		-0.0079028	2.65e-14	7.73e-11		-0.0020176	0.168549	1
MKI67	-0.0010594	0.38688	1		-0.0013243	0.24477	1		-0.0027305	0.0869645	1
MLLT1	0.0018661	0.12743	1		0.0009726	0.393397	1		0.0019985	0.20968	1
MLN	-0.003316	0.0062635	1		-0.0023058	0.0409872	1		-0.0066413	2.59e-05	0.0756878
MME	-0.0116405	9.3e-23	2.72e-19		-0.0143639	6.81e-39	1.99e-35		-0.0063955	3.8e-05	0.110901
MMP1	-0.005813	4.65e-07	0.0013572		-0.0046656	1.39e-05	0.0405451		-0.0035277	0.0193704	1
MMP10	-0.0080148	1.95e-12	5.69e-09		-0.0029652	0.0051581	1		-0.0098314	3.6e-11	1.05e-07
MMP12	-0.0225984	0	0		-0.0180037	0	0		-0.0210677	4.99e-37	1.46e-33
MMP13	0.0035266	0.0018977	1		0.0049846	2.16e-06	0.0063135		0.0007866	0.597727	1
MMP15	-0.0013304	0.267604	1		-0.0001452	0.89651	1		0.0008576	0.584202	1
MMP3	-0.0043209	0.0029705	1		-0.0018504	0.170714	1		-0.0013659	0.471843	1
MMP7	-0.0149642	3.01e-36	8.8e-33		-0.014158	1.06e-37	3.08e-34		-0.0139975	3.03e-19	8.84e-16
MMP8	-0.0099753	1.46e-18	4.28e-15		-0.0087591	1.07e-16	3.11e-13		-0.008117	4.33e-08	0.0001264
MMP9	-0.0106512	3.83e-20	1.12e-16		-0.0086924	6.59e-16	1.92e-12		-0.0077425	3.09e-07	0.0009029
MMUT	-0.0012663	0.299695	1		-0.002642	0.0201104	1		-0.0008761	0.581431	1
MN1	0.0011374	0.350702	1		0.0009189	0.417613	1		-0.0001148	0.94258	1
MNAT1	0.0006796	0.575804	1		0.0004506	0.690023	1		0.0008474	0.592569	1
MNDA	-0.0034468	0.0021181	1		-0.0032621	0.001729	1		-0.0039983	0.0064806	1
MOCS2	-0.0077012	3.49e-10	1.02e-06		-0.0090915	1.64e-15	4.79e-12		-0.002129	0.1829	1
MOG	-0.0118704	2.44e-24	7.12e-21		-0.0108317	1.86e-23	5.43e-20		-0.0061122	5.92e-05	0.172878
MORC3	-0.0002139	0.858637	1		-0.0004074	0.71528	1		-0.0002982	0.848912	1
MORF4L1	0.0024611	0.0425834	1		0.0010808	0.338393	1		0.0017984	0.255761	1
MORF4L2	0.001161	0.343284	1		0.000883	0.438733	1		-0.0004482	0.778601	1
MORN4	0.0006703	0.583668	1		-0.0003899	0.73203	1		0.0027394	0.0852212	1
MPHOSPH8	-0.0073195	7.44e-11	2.17e-07		-0.0082614	2.19e-15	6.39e-12		-0.0030374	0.0393389	1
MPI	-0.0068494	9.76e-10	2.85e-06		-0.0075193	5.11e-13	1.49e-09		-0.0022525	0.124642	1
MPIG6B	-0.0073869	3.72e-11	1.09e-07		-0.0077645	7.82e-14	2.28e-10		-0.0042	0.0039352	1
MPO	-0.0083553	2.6e-13	7.58e-10		-0.0084596	1.53e-15	4.46e-12		-0.006943	3.23e-06	0.0094311
MPRIP	-0.0021594	0.0747526	1		-0.002844	0.0115569	1		-0.0004341	0.78356	1
MRC1	-0.0240451	0	0		-0.0230261	0	0		-0.0183366	1.5e-27	4.37e-24
MRI1	-0.0043237	0.000427	1		-0.0055746	1.04e-06	0.0030438		-0.0008994	0.575393	1
MRPL24	-0.0032003	0.0087405	1		-0.0029154	0.0103008	1		-0.0040596	0.0106025	1
MRPL28	0.0004647	0.699097	1		-0.0006059	0.587766	1		0.0018791	0.23094	1
MRPL46	-0.0045027	6.18e-05	0.180568		-0.0046586	7.73e-06	0.0225631		-0.0027386	0.0634918	1
MRPL52	0.0009677	0.429366	1		0.000445	0.696305	1		0.0013283	0.40439	1
MRPL58	-0.0066447	3.72e-08	0.0001086		-0.0064358	9.87e-09	2.88e-05		-0.0045649	0.0037674	1
MRPS16	-0.0012168	0.320413	1		-0.0008411	0.460139	1		-0.0012033	0.450769	1
MSLN	-0.0015867	0.196546	1		0.0042279	0.000213	0.622011		-0.00414	0.0100494	1
MSLNL	0.0046166	0.0001533	0.447778		0.0046036	4.94e-05	0.144296		0.0007951	0.61825	1
MSMB	-0.0051326	3.37e-05	0.0984273		-0.0018203	0.113434	1		-0.0069336	1.69e-05	0.0492758
MSR1	-0.0165452	0	0		-0.0161139	0	0		-0.0120998	3.34e-14	9.75e-11
MSRA	-0.0077489	4.23e-12	1.24e-08		-0.008551	2.05e-16	5.99e-13		-0.0029079	0.0464742	1
MST1	-0.0062903	2.32e-07	0.0006787		-0.0060743	7.8e-08	0.0002277		-0.0048159	0.0024152	1
MSTN	0.0023431	0.0606978	1		-0.0002554	0.82545	1		0.0024854	0.129105	1
MTDH	-0.0098952	1.61e-15	4.69e-12		-0.0105934	4.52e-20	1.32e-16		-0.0049579	0.0021934	1
MTHFD2	-0.0021518	0.0734372	1		-0.0025504	0.0224762	1		-0.0010205	0.514778	1
MTHFSD	-0.0064401	1.29e-07	0.0003768		-0.0082092	4.57e-13	1.33e-09		-0.0024401	0.124997	1
MTIF3	-0.0113777	5.65e-21	1.65e-17		-0.011029	1.14e-22	3.32e-19		-0.0073016	3.91e-06	0.0114211
MTPN	-0.0002932	0.793623	1		-0.0015784	0.128706	1		0.0003994	0.785793	1
MTR	-0.0010084	0.408775	1		-0.0007925	0.485611	1		-0.0021074	0.184677	1
MTSS1	-0.0035042	0.0037586	1		-0.00453	5.57e-05	0.162787		0.0009776	0.535849	1
MTSS2	-0.0078545	8.29e-11	2.42e-07		-0.0085758	2.33e-14	6.79e-11		-0.0040166	0.0109014	1
MTUS1	-0.0100266	7.76e-16	2.27e-12		-0.0110919	9.19e-22	2.68e-18		-0.0049178	0.0024455	1
MUC13	-0.0103681	4.95e-19	1.45e-15		-0.0109473	3.06e-24	8.92e-21		-0.0089294	5.04e-09	1.47e-05
MUC16	-0.0014398	0.197347	1		0.0003091	0.765844	1		-0.0015447	0.290674	1
MUC2	-0.0029029	0.016388	1		-0.0037194	0.0009474	1		-0.0018908	0.23128	1
MUCL3	0.00017	0.889581	1		0.0002593	0.820037	1		0.0003997	0.801949	1
MVK	-0.0009724	0.385632	1		-0.0004839	0.641687	1		-0.0017358	0.236544	1
MXRA8	0.0139033	2.1e-22	6.14e-19		0.0167293	2.06e-36	6.01e-33		0.0071063	0.0001337	0.390378
MYBPC1	0.0037552	0.0039007	1		0.0067333	2.64e-08	7.71e-05		0.0013171	0.438238	1
MYBPC2	-0.0030313	0.0159237	1		-0.0029002	0.0131337	1		-0.0015802	0.336514	1
MYCBP2	-0.0036889	0.0022542	1		-0.0043208	0.0001192	0.34802		0.0006696	0.670922	1
MYDGF	-0.010471	4.47e-18	1.3e-14		-0.0108638	4.18e-22	1.22e-18		-0.0043499	0.0058586	1
MYH4	0.0005977	0.624163	1		0.0009786	0.388908	1		0.0013053	0.410992	1
MYH7B	0.0008869	0.468722	1		0.0005983	0.599509	1		0.002644	0.0969391	1
MYH9	-0.0075496	4.43e-10	1.29e-06		-0.0078248	3.65e-12	1.07e-08		-0.0024992	0.113928	1
MYL1	-0.000756	0.539738	1		-0.0007313	0.524035	1		-0.0005126	0.749353	1
MYL3	0.0059491	6.41e-06	0.0187101		0.0082415	1.77e-11	5.18e-08		0.0031366	0.0688576	1
MYL4	-0.0030088	0.0152959	1		-0.0041802	0.0002906	0.848501		-0.0019475	0.229929	1
MYL6B	0.0033133	0.0066518	1		0.002442	0.0315339	1		0.0023408	0.142751	1
MYLPF	-0.0035012	0.0055601	1		-0.0020284	0.0842002	1		-0.0025822	0.118007	1
MYO6	-0.0015927	0.185375	1		-0.0016158	0.148464	1		-0.0015343	0.328216	1
MYO9B	-0.0040012	0.0003663	1		-0.0042677	4.2e-05	0.122652		9.31e-05	0.949489	1
MYOC	-0.000964	0.38879	1		-0.0004809	0.64343	1		-0.0017195	0.23887	1
MYOM1	0.0004264	0.727259	1		0.0006661	0.557716	1		-0.0001157	0.942188	1
MYOM2	0.0049623	6.97e-05	0.203545		0.0053772	3.67e-06	0.0107126		0.0038774	0.0169577	1
MYOM3	0.011234	9.27e-18	2.71e-14		0.01331	7.75e-28	2.26e-24		0.009015	1.24e-07	0.0003623
MZB1	-0.0263344	0	0		-0.0218016	0	0		-0.0194932	3.04e-38	8.89e-35
MZT1	-0.0018901	0.0932598	1		-0.0021434	0.0403517	1		0.0011218	0.446743	1
NAA10	-0.0032695	0.0073876	1		-0.0039971	0.0004351	1		0.0012429	0.433985	1
NAA80	-0.0061085	6.35e-07	0.0018546		-0.0074105	8.24e-11	2.4e-07		-0.001302	0.417161	1
NAAA	0.0012196	0.278269	1		0.0029703	0.0044653	1		-0.0001617	0.912781	1
NACC1	-0.0063246	1.8e-07	0.000527		-0.0072378	1.31e-10	3.82e-07		-0.0030243	0.0557699	1
NADK	-0.0093208	2.86e-16	8.36e-13		-0.0107463	2.97e-24	8.68e-21		-0.0054033	0.0002949	0.860975
NAGA	0.0009987	0.416022	1		0.0009953	0.383482	1		-0.0008501	0.595108	1
NAGK	-0.0061632	7.36e-07	0.0021489		-0.0080964	2.63e-12	7.68e-09		-0.0005798	0.721646	1
NAGPA	-0.0077712	3.97e-10	1.16e-06		-0.0107171	1.73e-20	5.06e-17		-0.0032208	0.0465456	1
NAMPT	-0.0046852	3.37e-05	0.0985391		-0.0049911	1.96e-06	0.0057106		-0.0039247	0.0079845	1
NAP1L4	-0.0038447	0.0014753	1		-0.0049862	9.17e-06	0.0267896		0.0013837	0.380667	1
NAPRT	0.0015595	0.201023	1		0.0004561	0.687502	1		0.0021894	0.168344	1
NARS1	0.0004203	0.726575	1		0.000656	0.557191	1		-0.0001081	0.945067	1
NBL1	-0.0032379	0.0056009	1		-0.0015365	0.157707	1		-0.0052088	0.0006413	1
NBN	-0.003787	0.0008386	1		-0.0043662	3.32e-05	0.0970066		-0.0015037	0.310841	1
NCAM1	-0.0014186	0.233931	1		-0.0027543	0.0127397	1		-0.0005857	0.706835	1
NCAM2	0.0091099	4.71e-15	1.38e-11		0.0095566	8.66e-19	2.53e-15		0.0074286	9.9e-07	0.0028899
NCAN	-0.01459	2.51e-32	7.34e-29		-0.016764	0	0		-0.0094928	3.76e-09	1.1e-05
NCF2	-0.0044115	9.56e-05	0.279012		-0.0049478	2.55e-06	0.0074606		-0.0023498	0.110355	1
NCK2	-0.0070561	2.73e-10	7.98e-07		-0.0078145	5.68e-14	1.66e-10		-0.0016133	0.268483	1
NCLN	0.0032356	0.0039518	1		0.002289	0.0279945	1		0.0013531	0.356993	1
NCR1	0.0051743	7.29e-06	0.0212883		0.0046634	1.39e-05	0.0404885		0.0008434	0.574391	1
NCR3LG1	0.0052198	5.04e-05	0.147156		0.0062545	1.73e-07	0.0005063		0.0013419	0.424826	1
NCS1	0.0053	2.08e-05	0.0608482		0.0031674	0.0062858	1		0.0037564	0.0207721	1
NDRG1	-0.0003866	0.731078	1		-1.85e-05	0.98582	1		-0.0002281	0.877215	1
NDST1	0.0005936	0.622153	1		0.0006379	0.568791	1		0.0023197	0.139809	1
NDUFA5	-0.0069192	1.89e-08	5.51e-05		-0.0070076	9.17e-10	2.68e-06		-0.0026128	0.103337	1
NDUFB7	-0.0078737	7.21e-11	2.11e-07		-0.0082679	1.82e-13	5.3e-10		-0.0035464	0.024622	1
NDUFS6	-0.0046876	3.48e-05	0.101748		-0.0043614	3.35e-05	0.0979048		-0.0044091	0.0029451	1
NEB	0.0004512	0.713167	1		0.0003493	0.759882	1		-0.0014166	0.375235	1
NECAP2	-0.0072859	2.5e-09	7.31e-06		-0.0074618	5.46e-11	1.59e-07		-0.005258	0.0009505	1
NECTIN1	-0.0018953	0.122056	1		-0.0022247	0.0509754	1		-0.0022315	0.162383	1
NECTIN2	-0.0085776	1.26e-13	3.69e-10		-0.0065538	1.07e-09	3.12e-06		-0.0100374	3.55e-11	1.04e-07
NECTIN4	-0.0089378	7.33e-15	2.14e-11		-0.0066935	3.85e-10	1.13e-06		-0.0100808	1.83e-11	5.34e-08
NEDD4L	-0.0041338	0.0007721	1		-0.0052482	4.41e-06	0.012876		0.0011025	0.491321	1
NEDD9	-0.0015987	0.192811	1		-0.0016469	0.149125	1		-0.0024738	0.121961	1
NEFL	-0.0095626	3.78e-13	1.1e-09		-0.00699	1.02e-08	2.96e-05		-0.010373	1.97e-09	5.75e-06
NEK7	-0.0018897	0.119643	1		-0.0034641	0.0021604	1		0.0011414	0.470932	1
NELL1	0.0013942	0.214875	1		-0.0008005	0.444095	1		0.0075003	3.2e-07	0.0009347
NELL2	-0.0110747	5.65e-22	1.65e-18		-0.0138622	1.83e-38	5.35e-35		-0.0063094	2.58e-05	0.0754471
NENF	0.0020339	0.0922539	1		0.0012916	0.250001	1		-2.79e-05	0.985881	1
NEO1	0.0027014	0.0265036	1		0.0024395	0.0311765	1		0.0023532	0.138574	1
NEXN	-0.0043885	0.0002646	0.772772		-0.0042493	0.0001455	0.424862		3.25e-05	0.983507	1
NFASC	-0.0134401	3.66e-28	1.07e-24		-0.0148562	0	0		-0.0079037	7.09e-07	0.0020703
NFAT5	-0.0016745	0.171847	1		-0.0030139	0.0081796	1		0.0008936	0.575754	1
NFATC1	-0.002984	0.0080565	1		-0.0049592	2.19e-06	0.0063954		0.0011015	0.452409	1
NFATC3	-0.0013348	0.24094	1		-0.004225	6.31e-05	0.184341		-0.0017179	0.248709	1
NFE2	-0.005431	8.98e-06	0.0262119		-0.0066032	6.39e-09	1.86e-05		-0.0004393	0.783571	1
NFIC	-0.003416	0.0045154	1		-0.00464	3.35e-05	0.0977444		-0.0016172	0.302926	1
NFKB1	-0.0065691	8.73e-08	0.0002549		-0.0086104	4.86e-14	1.42e-10		-0.0017386	0.276609	1
NFKB2	-0.0007413	0.541235	1		-0.0010592	0.348013	1		-0.0005857	0.711198	1
NFKBIE	-0.0073206	1.13e-10	3.29e-07		-0.0086755	1.82e-16	5.33e-13		-0.0013889	0.350193	1
NFU1	-0.0121497	9.47e-24	2.77e-20		-0.0117512	1.4e-25	4.08e-22		-0.0076074	1.47e-06	0.0042935
NFX1	-0.0021367	0.0812132	1		-0.003891	0.0006476	1		0.0032032	0.0445851	1
NFYA	-0.0012395	0.311398	1		-0.0019025	0.0951381	1		-7.03e-05	0.964826	1
NGF	0.0007317	0.511301	1		0.0018899	0.0679675	1		0.0004438	0.761364	1
NGFR	0.0013518	0.260923	1		0.0010744	0.336816	1		0.0016482	0.293839	1
NGRN	-0.0052345	1.67e-05	0.0487205		-0.0049767	1.07e-05	0.0312007		-0.0027339	0.0844889	1
NHLRC3	-0.0181831	0	0		-0.0181727	0	0		-0.012484	5.12e-13	1.5e-09
NID1	-0.0143633	1.04e-35	3.02e-32		-0.0136075	3.53e-37	1.03e-33		-0.0108161	6.81e-13	1.99e-09
NID2	-0.0086953	1.09e-14	3.18e-11		-0.0088521	2.39e-17	6.98e-14		-0.0046775	0.0014509	1
NINJ1	0.0005681	0.615163	1		-0.0003288	0.754014	1		-0.00177	0.231626	1
NIT1	-0.0067842	3.65e-08	0.0001067		-0.0081583	1.06e-12	3.1e-09		-0.0009934	0.537537	1
NIT2	-0.0125035	8.8e-25	2.57e-21		-0.0138682	1.48e-34	4.33e-31		-0.0053906	0.0006955	1
NLGN1	0.0002949	0.808854	1		0.0007077	0.532487	1		0.0008055	0.613444	1
NLGN2	0.0014414	0.238823	1		0.0008785	0.439838	1		0.0011693	0.463981	1
NME1	0.0029457	0.0161177	1		0.002891	0.0111009	1		0.0021299	0.181806	1
NME3	-0.0028755	0.0105078	1		-0.0020234	0.0530524	1		-0.0032931	0.0246366	1
NMI	-0.0090251	9.13e-14	2.67e-10		-0.0085475	3.14e-14	9.17e-11		-0.0047096	0.0028864	1
NMNAT1	-0.0040955	0.0003068	0.895792		-0.0050803	1.45e-06	0.0042395		-0.0033486	0.0244653	1
NMRK2	0.0011639	0.341969	1		0.0011051	0.332432	1		0.0001202	0.939877	1
NMT1	-0.0060192	5.59e-07	0.0016328		-0.0057138	3.23e-07	0.0009442		-0.0029604	0.059293	1
NOMO1	-0.0197264	0	0		-0.0209114	0	0		-0.0116288	4.72e-14	1.38e-10
NOP56	-0.000679	0.578162	1		-0.0014114	0.214428	1		-0.0018475	0.245058	1
NOS1	0.0007699	0.523235	1		0.002071	0.0638557	1		0.0001689	0.91504	1
NOS2	-0.0064004	1.75e-07	0.0005104		-0.0068644	1.76e-09	5.14e-06		-0.004665	0.0034418	1
NOS3	-0.000397	0.723753	1		-0.0006263	0.547393	1		9.31e-05	0.949678	1
NOTCH1	0.0002689	0.814742	1		-0.0012712	0.233004	1		0.0022306	0.136293	1
NOTCH2	-0.0031198	0.0114892	1		-0.0030357	0.0082054	1		-0.0008531	0.596651	1
NOTCH3	-0.0009128	0.451542	1		0.0004583	0.684072	1		-0.0030065	0.0574064	1
NPC2	-0.0138241	8.67e-25	2.53e-21		-0.0125417	1.19e-23	3.47e-20		-0.0102275	6.34e-09	1.85e-05
NPDC1	-0.0124853	5.23e-26	1.53e-22		-0.0105556	7.65e-22	2.23e-18		-0.0114719	1.38e-13	4.02e-10
NPHS1	-0.0085741	2.72e-12	7.95e-09		-0.0098656	5.05e-18	1.47e-14		-0.0032411	0.0426143	1
NPHS2	0.0002807	0.818453	1		-0.0005533	0.626581	1		-0.0016119	0.311699	1
NPL	-0.0144355	5.56e-26	1.62e-22		-0.0162686	2.24e-37	6.53e-34		-0.0053095	0.003008	1
NPPB	-0.0046917	5.85e-05	0.170696		-0.0022533	0.0373214	1		-0.0031774	0.0378919	1
NPPC	-0.0230322	0	0		-0.0238905	0	0		-0.0167038	4.08e-23	1.19e-19
NPR1	0.0067193	4.11e-08	0.0001199		0.0045963	5.57e-05	0.162574		0.005552	0.0004967	1
NPTN	0.0014319	0.204361	1		0.0025081	0.0166361	1		0.001923	0.192947	1
NPTX1	-0.0088709	2.54e-14	7.4e-11		-0.0068418	2.49e-10	7.26e-07		-0.0091404	1.8e-09	5.25e-06
NPTX2	-0.0070253	8.23e-07	0.0024046		-0.0055322	3.01e-05	0.0879965		-0.0078121	2.7e-05	0.078839
NPTXR	-0.0064632	1.18e-08	3.45e-05		-0.005686	6.51e-08	0.0001902		-0.004077	0.0060177	1
NPY	-0.0045849	6.7e-05	0.195644		-0.0055601	2.05e-07	0.0005983		-0.0047997	0.0013778	1
NRCAM	-0.0073996	1.1e-10	3.23e-07		-0.0109761	6.1e-25	1.78e-21		-0.0011642	0.438319	1
NRGN	-0.0080326	2.47e-11	7.22e-08		-0.008498	3.06e-14	8.94e-11		-0.0037061	0.0183378	1
NRN1	0.0014524	0.227074	1		0.0009619	0.389577	1		0.0017412	0.267104	1
NRP1	0.0016783	0.144894	1		0.0016793	0.116018	1		0.0006454	0.667739	1
NRP2	-0.0055277	2.39e-06	0.0069818		-0.0058167	9.02e-08	0.0002633		-0.0031644	0.038563	1
NRTN	-0.0009129	0.416194	1		-0.0018738	0.0720768	1		-0.0005258	0.72039	1
NRXN3	-0.0003622	0.766515	1		2.17e-05	0.984744	1		0.00019	0.905202	1
NSFL1C	-0.0072735	1.17e-10	3.42e-07		-0.0086564	1.68e-16	4.92e-13		-0.0005119	0.728443	1
NT5C	-0.0056017	3.22e-06	0.0094046		-0.0062809	1.99e-08	5.82e-05		-0.0007419	0.636774	1
NT5C1A	-0.0153983	5.79e-32	1.69e-28		-0.0143424	4.44e-32	1.3e-28		-0.0119624	2.39e-12	6.98e-09
NT5C3A	-0.0037595	0.0007998	1		-0.0046628	7.78e-06	0.0227063		0.001041	0.47574	1
NT5E	-0.0069563	8.33e-10	2.43e-06		-0.0095002	2.01e-19	5.87e-16		-0.0046203	0.0017949	1
NTF3	0.003172	0.0050983	1		0.0019361	0.0660824	1		0.0011665	0.428787	1
NTF4	0.0001449	0.897733	1		-0.0012407	0.235954	1		0.0011909	0.419839	1
NTPROBNP	-0.0032146	0.0091265	1		0.0006849	0.54957	1		-0.0039905	0.0134387	1
NTRK2	-0.0014186	0.217271	1		-0.0043888	3.92e-05	0.114326		-0.0012805	0.395015	1
NTRK3	0.0117178	1.94e-22	5.67e-19		0.0111356	2.45e-23	7.14e-20		0.0102354	7.16e-11	2.09e-07
NUB1	-0.0066317	3.26e-09	9.51e-06		-0.0076458	2.19e-13	6.39e-10		-0.0013394	0.358573	1
NUBP1	0.0003402	0.778321	1		-0.0003063	0.785043	1		-0.0012499	0.427756	1
NUCB2	-0.0117154	7.17e-25	2.09e-21		-0.0113663	6.99e-27	2.04e-23		-0.0062276	2.75e-05	0.080345
NUDC	-0.0079184	1.17e-12	3.42e-09		-0.0085079	2.15e-16	6.26e-13		-0.0027287	0.060398	1
NUDT10	-0.0001626	0.893819	1		0.0004513	0.69035	1		-0.0009757	0.540146	1
NUDT15	-0.0011764	0.335152	1		-0.0016836	0.13847	1		-0.0003579	0.821764	1
NUDT16	-0.0105375	3.2e-18	9.36e-15		-0.0108766	4.19e-22	1.22e-18		-0.0064297	4.78e-05	0.13966
NUDT2	-0.0011243	0.314064	1		-0.0014085	0.174749	1		0.0012317	0.39945	1
NUDT5	-0.0099327	1.72e-18	5.01e-15		-0.0107565	1.39e-24	4.06e-21		-0.0037184	0.0118824	1
NUMB	-0.0082	3.01e-11	8.79e-08		-0.0091871	1.16e-15	3.39e-12		-0.0025771	0.109048	1
NUP50	0.0013248	0.277514	1		0.0012117	0.286071	1		-0.0002516	0.874094	1
NXPE4	0.0009825	0.42058	1		0.0001893	0.867619	1		0.000763	0.630802	1
NXPH1	-0.0055043	1.09e-06	0.0031966		-0.0044118	2.49e-05	0.0727807		-0.0015434	0.297934	1
NXPH3	0.0042301	0.0008338	1		0.0033913	0.0039698	1		0.0016494	0.3174	1
OBP2B	0.0025427	0.0636308	1		0.0030708	0.0159909	1		0.0029176	0.104967	1
OCLN	-0.0152652	8.37e-32	2.44e-28		-0.0148643	1.02e-34	2.97e-31		-0.0114564	1.53e-11	4.48e-08
ODAM	0.0003257	0.775361	1		-0.001345	0.203221	1		-0.0006326	0.672946	1
OFD1	6.84e-05	0.955073	1		0.00115	0.308329	1		-0.0013439	0.395727	1
OGA	-0.0071012	4.12e-09	1.2e-05		-0.0083423	1.07e-13	3.13e-10		-0.0024975	0.113347	1
OGFR	-0.0019333	0.0924568	1		-0.0035858	0.0007843	1		0.0023715	0.114847	1
OGN	-0.007368	2.38e-09	6.96e-06		-0.0057314	5.74e-07	0.0016761		-0.0094414	4.61e-09	1.35e-05
OGT	0.0002615	0.829554	1		-4.14e-05	0.97077	1		-0.0011038	0.485896	1
OLFM4	-0.0028588	0.0229817	1		-0.0035202	0.0026425	1		-0.0027232	0.0966676	1
OLR1	-0.0081481	6.51e-13	1.9e-09		-0.0072462	5.71e-12	1.67e-08		-0.0059664	5.79e-05	0.168971
OMD	0.0055104	3.99e-06	0.011642		0.0036414	0.0010556	1		0.0031678	0.0420677	1
OMG	-0.0018306	0.106867	1		-0.0025092	0.0173895	1		0.0066122	8.58e-06	0.0250422
OMP	0.0010603	0.385889	1		0.0001829	0.872152	1		0.0015624	0.327483	1
OPHN1	-0.0044583	0.0002115	0.617479		-0.0057956	2.21e-07	0.0006441		0.0003808	0.808163	1
OPLAH	-0.0061973	4.23e-07	0.001236		-0.0071464	3.54e-10	1.03e-06		-0.0032235	0.0442319	1
OPTC	-0.0096935	1.62e-16	4.73e-13		-0.0083473	2.14e-14	6.26e-11		-0.0096964	2.95e-10	8.6e-07
ORM1	-0.0155316	4.69e-35	1.37e-31		-0.0134835	9.23e-31	2.7e-27		-0.0154302	5.35e-21	1.56e-17
OSBPL2	-0.0013039	0.278306	1		-0.0005475	0.624398	1		-0.0032054	0.0408371	1
OSCAR	-0.003487	0.0023648	1		-0.0017643	0.0983759	1		-0.0063122	2.44e-05	0.0711899
OSM	-0.0129115	1.02e-28	2.97e-25		-0.0113104	1.18e-25	3.44e-22		-0.0105108	3.58e-12	1.05e-08
OSMR	-0.0147742	1.03e-36	3.01e-33		-0.0132355	2.55e-34	7.46e-31		-0.0136895	2.83e-19	8.25e-16
OSTN	-0.0034631	0.0045612	1		-0.0034196	0.0026026	1		-0.0019878	0.213284	1
OTOA	0.0001368	0.910953	1		1.37e-05	0.990367	1		-0.0008225	0.606342	1
OTUD6B	-0.0080836	2.05e-11	5.97e-08		-0.0088488	2.92e-15	8.53e-12		-0.0024382	0.121651	1
OTUD7B	-0.008809	3.23e-13	9.42e-10		-0.0093152	1.18e-16	3.44e-13		-0.0028388	0.072131	1
OXCT1	-0.0119527	1.55e-22	4.51e-19		-0.0112052	7.06e-23	2.06e-19		-0.007442	3.34e-06	0.0097565
OXT	-0.0166635	0	0		-0.0192594	0	0		-0.0096676	1.05e-09	3.08e-06
P4HB	-0.0156867	0	0		-0.0169324	0	0		-0.0072942	1e-06	0.0029197
PACS2	-0.0052446	1.82e-05	0.0531896		-0.0068571	1.75e-09	5.11e-06		-0.0008668	0.586335	1
PADI2	-0.0018705	0.0964244	1		-0.0022886	0.0283572	1		-0.0022425	0.127674	1
PADI4	-0.0001269	0.910709	1		-0.0004691	0.654404	1		-0.0009029	0.54341	1
PAEP	-0.0004511	0.708883	1		0.0001393	0.901248	1		0.0014971	0.344882	1
PAFAH1B3	0.0025849	0.0325234	1		0.001943	0.0839479	1		0.0015397	0.329128	1
PAFAH2	-0.0056333	3.5e-06	0.0102145		-0.006281	2.67e-08	7.81e-05		-0.0020406	0.197503	1
PAG1	-0.010393	1.12e-18	3.27e-15		-0.0109321	1.33e-23	3.89e-20		-0.0064966	2.61e-05	0.0762547
PAGR1	-0.0060154	8.49e-07	0.0024802		-0.0070507	5.41e-10	1.58e-06		-0.0011449	0.473635	1
PAIP2B	-0.0002162	0.859924	1		0.000621	0.58614	1		-0.0009948	0.532906	1
PAK4	-0.0065091	7.9e-09	2.31e-05		-0.0076636	2.25e-13	6.58e-10		-0.0021105	0.154165	1
PALLD	9.29e-07	0.999394	1		2.01e-06	0.998587	1		-0.000558	0.726256	1
PALM	-0.0070846	4.68e-08	0.0001367		-0.0077467	1.31e-10	3.83e-07		-0.0049988	0.003167	1
PALM2	-0.0177043	0	0		-0.0185803	0	0		-0.0139478	4.32e-16	1.26e-12
PALM3	0.001249	0.307471	1		0.000411	0.718281	1		-0.0002353	0.882537	1
PAM	-0.0047722	2.58e-05	0.0752727		-0.0052979	4.94e-07	0.0014426		-0.0025271	0.0879472	1
PAMR1	-0.013256	1.44e-28	4.2e-25		-0.0166965	0	0		-0.0053685	0.0005861	1
PAPPA	0.000321	0.785634	1		0.0028902	0.0082943	1		0.0001699	0.912381	1
PARD3	-0.00203	0.0945174	1		-0.0028805	0.0107476	1		-0.0005964	0.706376	1
PARK7	-0.0088201	6e-15	1.75e-11		-0.0096405	4.05e-20	1.18e-16		-0.002586	0.0796934	1
PARP1	-0.008135	8.29e-13	2.42e-09		-0.009142	5.25e-18	1.53e-14		-0.0047069	0.0014714	1
PAXX	-0.0086365	3.02e-12	8.82e-09		-0.0100785	2.04e-18	5.97e-15		-0.0029669	0.0657704	1
PBK	0.0027046	0.027167	1		0.0037734	0.0009294	1		0.0019236	0.227314	1
PBLD	-0.0102025	8.04e-19	2.35e-15		-0.0123773	3.96e-31	1.16e-27		-0.0041317	0.0063003	1
PBXIP1	-0.0012428	0.314091	1		-0.0028464	0.0131254	1		-0.0011755	0.465833	1
PCARE	0.0009878	0.4196	1		0.0010374	0.361727	1		0.0017564	0.271385	1
PCBD1	-0.013146	9.77e-24	2.85e-20		-0.0168416	0	0		-0.0052059	0.0022742	1
PCBP2	-0.0075798	3.44e-10	1e-06		-0.0086872	1e-14	2.93e-11		-0.0022388	0.155459	1
PCDH1	0.0032094	0.0049909	1		0.0028064	0.0082925	1		0.0026784	0.0723173	1
PCDH12	0.0023801	0.0486358	1		0.0012354	0.271043	1		0.001715	0.276274	1
PCDH17	0.0112469	1.32e-22	3.87e-19		0.0096534	1.49e-19	4.36e-16		0.0083383	3.07e-08	8.97e-05
PCDH7	0.0023731	0.0514523	1		0.0023578	0.037364	1		-0.0006828	0.667796	1
PCDH9	0.000329	0.793531	1		-0.0016949	0.14686	1		0.000398	0.808363	1
PCDHB15	0.0061557	3.74e-07	0.0010921		0.0054712	1.18e-06	0.0034359		0.0040744	0.009926	1
PCNA	-0.0009383	0.44339	1		-0.0007144	0.530713	1		-0.0012331	0.438914	1
PCSK7	-0.0010853	0.368985	1		-0.0025004	0.0259478	1		-0.0003882	0.805398	1
PCSK9	-0.0128487	1.28e-26	3.74e-23		-0.0143425	1.02e-37	2.99e-34		-0.007354	2.86e-06	0.0083378
PCYT2	-0.0091286	4.42e-14	1.29e-10		-0.0100871	2.85e-19	8.33e-16		-0.0033898	0.0318873	1
PDAP1	-0.0091606	2.63e-14	7.69e-11		-0.0091282	3.42e-16	9.99e-13		-0.0043168	0.0060118	1
PDCD1	-0.0019565	0.0879368	1		-0.0024122	0.0237956	1		-0.0042747	0.0042568	1
PDCD1LG2	-0.0047596	2.69e-05	0.0784956		-0.0030457	0.0038445	1		-0.0066809	6.72e-06	0.01962
PDCD5	-0.0124305	2.86e-28	8.34e-25		-0.0129685	4e-35	1.17e-31		-0.0059875	4.8e-05	0.140263
PDCD6	-0.0059982	7.32e-08	0.0002138		-0.004901	2.16e-06	0.0063041		-0.0053608	0.0002388	0.697313
PDCL2	-0.0008563	0.484046	1		-0.0003697	0.745497	1		-0.0013032	0.413116	1
[truncated: 925 more rows]
