# Supplementary material for: Lung function, proteomic signatures, and risk of metabolic dysfunction-associated steatotic liver disease
Source: Research Square preprint supplement (doi:10.21203/rs.3.rs-6381296/v1), 2025-04-08
Supplement: Supplementary file 5 [file 2e17b452442c94a1eef159b9.xlsx]

## Sheet: Table S6
Table S6. Association of the proteins constituting the proteomic signature with lung function and MASLD risk and liver MRI indices.
Assay	Proteomic signature coefficient (weights)				MASLD			PDFF			cT1
	FEV1	FVC	PEF		HR (95% CI)	FDR		β (95% CI)	FDR		β (95% CI)	FDR
ABCA2		-0.0002091			1.187 (1.0862,1.2975)	0.454079		0.3096 (0.1471,0.4721)	0.557225		0.003 (2e-04,0.0058)	1
ABHD14B	0.0123187	0.0191664			1.088 (0.9945,1.191)	1		0.0454 (-0.0901,0.1809)	1		6e-04 (-0.0017,0.0029)	1
ACADM	0.0004326				1.102 (1.0144,1.1982)	1		0.016 (-0.1527,0.1848)	1		7e-04 (-0.0021,0.0035)	1
ACADSB	-0.0003958	-0.0042689			1.074 (0.9764,1.181)	1		0.2402 (0.0755,0.405)	1		0.0015 (-0.0014,0.0043)	1
ACAN	0.0451648	0.0615395	5.55131		0.9092 (0.8262,1.0007)	1		-0.2774 (-0.426,-0.1287)	0.753876		-0.0045 (-0.0071,-0.0019)	1
ACHE	0.0291214	0.0319233	0.197118		1.171 (1.066,1.2854)	1		0.2239 (0.0438,0.404)	1		-4e-04 (-0.0035,0.0026)	1
ACOX1	-0.0017096	-0.0036329			1.051 (0.9664,1.1424)	1		-0.059 (-0.1958,0.0777)	1		0.002 (-3e-04,0.0043)	1
ACP5	0.0050672	0.0041257			1.331 (1.2439,1.4247)	4.15e-13		0.7081 (0.5641,0.8522)	2.8e-18		0.0012 (-0.0013,0.0037)	1
ACP6	0.0015213	0.0008191			1.073 (0.9771,1.1787)	1		-0.0148 (-0.1524,0.1227)	1		-4e-04 (-0.0029,0.002)	1
ACRV1			0.139194		0.9637 (0.8327,1.1153)	1		-0.0118 (-0.2725,0.2489)	1		-0.0013 (-0.0057,0.0032)	1
ACSL1	0.0024258				0.937 (0.8404,1.0448)	1		-0.0702 (-0.2483,0.1079)	1		-0.0011 (-0.0041,0.002)	1
ACTA2	-0.0029694	-0.0041821			1.107 (1.0144,1.2076)	1		-0.0308 (-0.1852,0.1237)	1		0.0052 (0.0025,0.0078)	0.348302
ACTN4		-0.0045858			1.091 (1.012,1.1762)	1		0.0069 (-0.1273,0.141)	1		0.0011 (-0.0012,0.0033)	1
ACVRL1	0.0211237	0.0296581			1.153 (1.0538,1.2605)	1		0.2479 (0.0786,0.4171)	1		0.0074 (0.0045,0.0104)	0.0021915
ACY3		-0.0033877			1.543 (1.427,1.668)	3.76e-24		0.4703 (0.2907,0.6499)	0.0008871		0.0077 (0.0046,0.0108)	0.0029249
ADA	0.0010436				1.162 (1.0695,1.2625)	1		0.1188 (-0.0235,0.2611)	1		0.0037 (0.0012,0.0062)	1
ADA2	-0.0049289				1.357 (1.2473,1.4767)	3.85e-09		-0.0226 (-0.1755,0.1303)	1		0.0081 (0.0054,0.0107)	6.88e-06
ADAM12	0.0063476	0.0189746			1.165 (1.075,1.2623)	0.57242		0.3368 (0.1692,0.5044)	0.244221		0.0065 (0.0037,0.0093)	0.0121672
ADAM15	0.010054	0.0164882			1.195 (1.0926,1.3064)	0.276918		0.0034 (-0.1356,0.1424)	1		0.0012 (-0.0012,0.0036)	1
ADAM22		-0.0028495			1.07 (0.9789,1.1703)	1		0.1184 (-0.0308,0.2675)	1		0.0021 (-5e-04,0.0047)	1
ADAM23		-0.0033277			0.9969 (0.9118,1.0899)	1		0.0618 (-0.0812,0.2048)	1		7e-04 (-0.0018,0.0032)	1
ADAM9	-0.0030231	-0.0138389			1.239 (1.1369,1.3504)	0.0030739		0.0834 (-0.0959,0.2627)	1		0.0028 (-3e-04,0.0058)	1
ADAMTS13	0.0452614	0.0719274			1.266 (1.157,1.385)	0.0008073		0.2106 (0.0712,0.3499)	1		0.0045 (0.0021,0.0069)	0.726409
ADAMTS15	-0.0101438				1.395 (1.2669,1.5354)	3.38e-08		0.5697 (0.4191,0.7202)	4.23e-10		0.0056 (0.003,0.0083)	0.0691053
ADAMTS16	-0.0050015	-0.0223847			1.103 (1.0264,1.1847)	1		0.1275 (-0.0047,0.2596)	1		0.0025 (2e-04,0.0049)	1
ADAMTS8	-0.0142898	-0.0245473			0.8938 (0.8181,0.9764)	1		-0.1377 (-0.2796,0.0043)	1		-0.0059 (-0.0084,-0.0035)	0.0058732
ADAMTSL4	0.0582348	0.0559736			1.205 (1.1019,1.3186)	0.132045		0.192 (0.0211,0.3628)	1		0.003 (0,0.0059)	1
ADAMTSL5	0.0090059	0.0049715			0.9234 (0.8377,1.018)	1		-0.1157 (-0.2861,0.0548)	1		-0.0023 (-0.0053,6e-04)	1
ADCYAP1R1	0.001571	0.0028378			0.9932 (0.9039,1.0914)	1		-0.0442 (-0.1861,0.0977)	1		0.001 (-0.0015,0.0036)	1
ADGRD1	0.0064178	0.0253256			1.465 (1.3272,1.616)	8.78e-11		0.7128 (0.5195,0.9062)	1.83e-09		0.0056 (0.0023,0.0089)	1
ADGRE1	0.0143977	0.0167093			1.337 (1.2225,1.4611)	5.27e-07		0.0869 (-0.0845,0.2583)	1		0.0049 (0.002,0.0078)	1
ADGRE2	0.0359075	0.0122304			1.319 (1.2075,1.4405)	2.27e-06		0.071 (-0.0782,0.2202)	1		0.0029 (3e-04,0.0055)	1
ADGRE5	0.0759668	0.0423383	0.108046		1.271 (1.1706,1.3806)	3.41e-05		0.1712 (0.0211,0.3213)	1		0.0052 (0.0026,0.0078)	0.272652
ADGRF5	0.001588				1.123 (1.0163,1.241)	1		0.0927 (-0.0771,0.2626)	1		0.0035 (6e-04,0.0064)	1
ADGRG2	-0.0099498	-0.004078			0.8903 (0.8052,0.9844)	1		-0.3078 (-0.4634,-0.1522)	0.313531		-0.0053 (-0.008,-0.0026)	0.308855
ADGRV1	-0.0001275	-0.0010467			0.967 (0.8727,1.0715)	1		-0.1759 (-0.3347,-0.0171)	1		-8e-04 (-0.0035,0.002)	1
ADH4		-0.0007728			1.926 (1.7558,2.1126)	0		1.4 (1.2506,1.5503)	0		0.017 (0.0143,0.0196)	2.13e-32
ADM	-0.0361197	-0.0255624			1.453 (1.308,1.6131)	8.57e-09		0.5436 (0.379,0.7081)	3.08e-07		0.0124 (0.0095,0.0152)	3.44e-14
ADRA2A		0.0009637			1.026 (0.9308,1.1318)	1		-0.0229 (-0.1809,0.135)	1		0.0023 (-4e-04,0.005)	1
AFAP1	0.0054416	0.006762			1.042 (0.9466,1.1465)	1		-0.0179 (-0.1893,0.1534)	1		6e-04 (-0.0024,0.0035)	1
AFM	0.0031974				1.575 (1.4313,1.7334)	4.05e-17		1.472 (1.2969,1.6471)	0		0.0165 (0.0134,0.0196)	1.6e-21
AFP	-0.0066196	-0.0084474			1.095 (0.9951,1.2038)	1		0.0064 (-0.1348,0.1475)	1		-0.0013 (-0.0037,0.0012)	1
AGBL2		0.0022167			0.9185 (0.8375,1.0073)	1		-0.0479 (-0.2096,0.1138)	1		-6e-04 (-0.0034,0.0021)	1
AGER	0.111229	0.170675	1.92642		0.8698 (0.7938,0.953)	1		-0.4029 (-0.5514,-0.2544)	0.0003226		-0.0039 (-0.0065,-0.0014)	1
AGR2	0.0003808	0.0013418			1.186 (1.0815,1.3014)	0.863159		-0.0066 (-0.1495,0.1363)	1		0.0021 (-3e-04,0.0046)	1
AGR3	-0.0001763				1.253 (1.1564,1.3587)	0.0001155		0.4569 (0.3219,0.592)	1.09e-07		0.0036 (0.0012,0.0059)	1
AGRN	0.0102666	0.0008381			1.348 (1.25,1.4544)	2.98e-11		0.6724 (0.511,0.8338)	1.22e-12		0.0124 (0.0097,0.0152)	3.2e-15
AGRP	0.014919	0.009449			1.169 (1.0651,1.2822)	1		0.1989 (0.0598,0.3379)	1		9e-04 (-0.0015,0.0033)	1
AHCY		-0.0021122			1.178 (1.0795,1.2859)	0.695436		0.0972 (-0.0433,0.2376)	1		0.0038 (0.0015,0.0062)	1
AHNAK	0.0552651	0.0571968			1.165 (1.0641,1.2751)	1		0.5001 (0.3163,0.6839)	0.0003024		0.006 (0.0028,0.0092)	0.645762
AHNAK2	0.0085579	0.0243309			1.039 (0.9437,1.1444)	1		0.0281 (-0.1364,0.1925)	1		2e-04 (-0.0026,0.003)	1
AHSA1	-7.3e-05				1.013 (0.9179,1.1177)	1		0.1269 (-0.0314,0.2852)	1		0.0015 (-0.0011,0.0041)	1
AHSG		0.0169359			1.114 (1.0102,1.2274)	1		0.5221 (0.3655,0.6787)	2.15e-07		0.005 (0.0024,0.0077)	0.625016
AIF1L		0.0068527			1.042 (0.9498,1.1441)	1		0.0812 (-0.0837,0.2461)	1		0.0023 (-5e-04,0.0052)	1
AKAP12		0.0004738			0.9566 (0.8653,1.0575)	1		-0.0071 (-0.164,0.1499)	1		-0.0031 (-0.0057,-4e-04)	1
AKR1B1	0.0028811	0.0048345			1.072 (0.9795,1.1729)	1		0.0747 (-0.0615,0.2109)	1		0.0013 (-0.001,0.0037)	1
AKT3		-0.0039734			1.039 (0.9494,1.1372)	1		-0.0347 (-0.1704,0.1009)	1		9e-04 (-0.0014,0.0033)	1
ALCAM	-0.092903	-0.14754			1.474 (1.3487,1.6114)	3.68e-14		0.138 (-0.0183,0.2943)	1		0.0042 (0.0015,0.0068)	1
ALDH1A1		0.0011117			1.578 (1.4688,1.6952)	3.09e-32		1.034 (0.8874,1.1809)	0		0.0116 (0.0091,0.0141)	1.23e-15
ALDH2	0.0020196	0.0027876			1.126 (1.0484,1.2094)	1		0.0711 (-0.0836,0.2258)	1		4e-04 (-0.0023,0.0031)	1
ALDH5A1	-0.0014196	-0.0033818			1.29 (1.1937,1.3946)	3.86e-07		0.1887 (0.0133,0.364)	1		0.0027 (-3e-04,0.0057)	1
ALPP	-0.0140743	-0.0017715	-1.19989		1.123 (1.0142,1.2443)	1		0.0162 (-0.1554,0.1878)	1		1e-04 (-0.0029,0.003)	1
AMBN	-0.0173815	-0.0243282			0.9415 (0.8537,1.0383)	1		-0.0211 (-0.1543,0.1122)	1		-7e-04 (-0.0029,0.0014)	1
AMFR	-0.0021661	-0.0008072			1.061 (0.9701,1.1594)	1		0.0822 (-0.0521,0.2164)	1		0.0038 (0.0015,0.0061)	1
AMIGO2	-0.0159215	-0.0190466			1.248 (1.1421,1.3641)	0.0029278		0.047 (-0.0949,0.189)	1		0.0034 (0.001,0.0059)	1
AMN	0.0013871	0.0024294			1.119 (1.0272,1.2189)	1		0.3495 (0.2099,0.489)	0.0027575		0.0041 (0.0017,0.0065)	1
AMOT	-0.008347	-0.0248789			1.402 (1.2776,1.5395)	3.37e-09		0.5273 (0.3425,0.712)	7.03e-05		0.0084 (0.0052,0.0115)	0.0007171
AMPD3	-0.0009717				1.04 (0.9431,1.1472)	1		0.1653 (0.0017,0.3289)	1		0.001 (-0.0018,0.0038)	1
AMY1A_AMY1B_AMY1C		0.0033543			0.8937 (0.806,0.9911)	1		-0.2292 (-0.4077,-0.0508)	1		-0.0024 (-0.0055,8e-04)	1
AMY2A	-0.0138629	-0.0231012			0.9117 (0.8327,0.9981)	1		-0.2558 (-0.3991,-0.1125)	1		-0.0036 (-0.0061,-0.0011)	1
ANG	0.0247802	0.03547			1.106 (1.0102,1.2107)	1		0.2455 (0.0989,0.3922)	1		0.0058 (0.0032,0.0083)	0.027271
ANGPT2		-0.003254			1.292 (1.1831,1.4111)	3.5e-05		0.2377 (0.0926,0.3827)	1		0.0108 (0.0083,0.0133)	5.18e-14
ANGPTL1	0.0224111	0.0420658			1.254 (1.1456,1.3718)	0.0025848		0.0531 (-0.0908,0.197)	1		8e-04 (-0.0017,0.0032)	1
ANGPTL3	-0.0190543	-0.0246885			1.127 (1.0224,1.2413)	1		0.0169 (-0.1388,0.1726)	1		0.003 (3e-04,0.0057)	1
ANGPTL7	0.0078372	0.01424			1.341 (1.2393,1.4513)	9.21e-10		0.3171 (0.1726,0.4616)	0.0507259		0.0011 (-0.0014,0.0036)	1
ANK2	-0.0015947	-0.0035872			1.148 (1.0566,1.2473)	1		0.1029 (-0.0618,0.2677)	1		0.0015 (-0.0014,0.0044)	1
ANKRA2	-0.0025876				0.9744 (0.8808,1.078)	1		-0.0152 (-0.1791,0.1486)	1		8e-04 (-0.002,0.0035)	1
ANKRD54		0.0006306			1.02 (0.9329,1.115)	1		0.1398 (0.0054,0.2742)	1		0.0014 (-9e-04,0.0037)	1
ANP32C	0.0006947				0.9655 (0.8671,1.075)	1		-0.1045 (-0.2717,0.0626)	1		-0.0015 (-0.0044,0.0014)	1
ANPEP	-0.0010585	-0.0172241			1.363 (1.2644,1.4683)	1.47e-12		0.0879 (-0.0514,0.2272)	1		0.0015 (-9e-04,0.0039)	1
ANXA1	-0.0092003				1.073 (0.9802,1.1752)	1		0.1783 (-0.0015,0.3581)	1		0.0042 (0.0012,0.0072)	1
ANXA5		0.0022501			1.038 (0.9469,1.137)	1		-0.0531 (-0.1869,0.0807)	1		0.0042 (0.002,0.0065)	0.687254
AOC1	-0.0019069	-0.0008931			1.07 (0.9841,1.1627)	1		0.1266 (-0.0069,0.2601)	1		2e-04 (-0.0022,0.0025)	1
AOC3	0.0229036	0.0368638			1.138 (1.0351,1.2512)	1		-0.1804 (-0.3293,-0.0314)	1		-0.0015 (-0.0041,0.001)	1
AP1G2	0.0003298				1.085 (0.987,1.1929)	1		0.2195 (0.0507,0.3884)	1		0.0018 (-0.0011,0.0046)	1
APCS	0.0364638	0.0424041			1.132 (1.0033,1.2769)	1		0.8045 (0.6115,0.9974)	1.29e-12		0.0056 (0.0023,0.0089)	1
APLP1	-0.0079579	-0.0121827			0.8771 (0.799,0.9629)	1		-0.2636 (-0.4053,-0.1219)	0.781927		-0.0051 (-0.0075,-0.0027)	0.131519
APOA2	-0.0020815	-0.0115962			1.04 (0.9429,1.1465)	1		-0.4908 (-0.668,-0.3136)	0.0001765		-0.0041 (-0.0072,-0.0011)	1
APOBR	-0.0083561	-0.0184195			1.042 (0.943,1.1507)	1		-0.1176 (-0.2825,0.0473)	1		-0.0022 (-0.0051,6e-04)	1
APOD	-0.0027367				0.7914 (0.692,0.9051)	1		-0.5293 (-0.7022,-0.3564)	6.37e-06		-0.0071 (-0.0101,-0.0041)	0.0093446
APOF	0.0304487	0.0325074			0.7934 (0.7585,0.8298)	1.73e-20		-1.158 (-1.3439,-0.9717)	5.89e-30		-0.016 (-0.0192,-0.0129)	3.54e-19
APOH	-0.0031993				1.062 (0.9741,1.1575)	1		0.0468 (-0.0932,0.1867)	1		1e-04 (-0.0023,0.0025)	1
APOM	0.0346447	0.0385264			0.7782 (0.71,0.853)	0.0002514		-0.0783 (-0.2327,0.0761)	1		-0.0049 (-0.0076,-0.0022)	1
ARAF	-0.0038177	-0.002805			0.9907 (0.898,1.093)	1		-5e-04 (-0.1694,0.1684)	1		0.0011 (-0.0018,0.004)	1
AREG		-0.0027479			1.288 (1.1906,1.393)	7.84e-07		0.1159 (-0.0268,0.2587)	1		0.0054 (0.003,0.0078)	0.039184
ARG1	-0.0202327	-0.0237882			0.9917 (0.9069,1.0844)	1		0.1209 (-0.0149,0.2568)	1		-5e-04 (-0.0028,0.0019)	1
ARG2	0.0097226	0.00774			0.9608 (0.8676,1.0641)	1		-0.0844 (-0.2482,0.0794)	1		2e-04 (-0.0027,0.0031)	1
ARHGAP1		0.0025337			1.011 (0.9218,1.1089)	1		0.0037 (-0.1298,0.1372)	1		1e-04 (-0.0023,0.0024)	1
ARHGAP30	0.000836				0.9567 (0.8582,1.0664)	1		-0.0044 (-0.1626,0.1538)	1		0.0026 (-2e-04,0.0053)	1
ARHGEF5	0.0037051	0.0091989			1.138 (1.0432,1.2424)	1		0.0573 (-0.1116,0.2263)	1		0.0016 (-0.0013,0.0046)	1
ARID3A	-0.0084591	-0.0205905			0.9255 (0.8338,1.0273)	1		-0.0633 (-0.225,0.0985)	1		0.0021 (-7e-04,0.005)	1
ARID4B	-0.0034888	-0.0047149			0.9612 (0.8718,1.0598)	1		0.144 (6e-04,0.2875)	1		0.0026 (2e-04,0.0051)	1
ARMCX2	0.0005227				0.9988 (0.9032,1.1046)	1		-0.0965 (-0.2569,0.064)	1		-0.001 (-0.0039,0.0019)	1
ARNT	0.0068941	0.0024858			0.9895 (0.9014,1.0863)	1		0.0155 (-0.1136,0.1445)	1		5e-04 (-0.0017,0.0027)	1
ARNTL		-0.0013394			1.027 (0.9353,1.1272)	1		0.1133 (-0.0497,0.2764)	1		0.0012 (-0.0016,0.004)	1
ARSB	-0.0122063	-0.0124786			1.225 (1.1253,1.3336)	0.0082459		0.4659 (0.3249,0.607)	3.09e-07		0.0074 (0.005,0.0099)	6.57e-06
ART3	0.0882407	0.106717	16.2716		0.8701 (0.7911,0.957)	1		-0.4728 (-0.6348,-0.3108)	3.32e-05		-0.0043 (-0.0072,-0.0015)	1
ASGR1	-0.0102675	-0.0253169			1.522 (1.4119,1.6417)	2.53e-24		0.7836 (0.6317,0.9356)	2.67e-20		0.01 (0.0074,0.0126)	3.12e-10
ASGR2	0.0041856	0.0036863			1.065 (0.9696,1.1698)	1		0.3067 (0.1303,0.4831)	1		0.0043 (0.0013,0.0073)	1
ASPN		-0.0005215			1.121 (1.0305,1.2189)	1		0.1046 (-0.0655,0.2747)	1		-0.0014 (-0.0043,0.0015)	1
ASS1	-0.0050134	-0.010066			1.738 (1.5827,1.9085)	1.57e-27		1.013 (0.8369,1.1897)	2.36e-25		0.0076 (0.0045,0.0107)	0.0048184
ATF2	0.0019575				1.049 (0.964,1.1413)	1		-0.0243 (-0.1523,0.1037)	1		6e-04 (-0.0015,0.0028)	1
ATP1B1		-0.0020809			1.117 (1.0412,1.1989)	1		0.0096 (-0.1417,0.1609)	1		5e-04 (-0.0021,0.0031)	1
ATP1B2	-0.0086445				1.001 (0.9072,1.1047)	1		-0.0888 (-0.2569,0.0793)	1		-0.0026 (-0.0055,3e-04)	1
ATP1B4		0.0119965			1.03 (0.9362,1.1341)	1		-0.1057 (-0.268,0.0567)	1		4e-04 (-0.0024,0.0033)	1
ATP2B4		-0.0068417			0.9922 (0.8957,1.099)	1		-0.0204 (-0.1752,0.1343)	1		0.0011 (-0.0016,0.0038)	1
ATP5PO		-0.0018471			0.9937 (0.9047,1.0914)	1		0.0421 (-0.0893,0.1735)	1		5e-04 (-0.0017,0.0027)	1
ATP6V1G2	0.0021461	0.0049602			0.9911 (0.8969,1.0953)	1		0.0313 (-0.1282,0.1909)	1		-0.0013 (-0.004,0.0014)	1
ATRAID	-0.02212	-0.0333731			1.116 (1.0529,1.1829)	0.639334		0.0668 (-0.0981,0.2318)	1		0.0036 (8e-04,0.0064)	1
ATXN2	0.004117	8.06e-05			1.074 (0.9812,1.1755)	1		-0.05 (-0.209,0.1089)	1		0.0011 (-0.0017,0.0039)	1
B3GAT3	-0.0151007	-0.0329442			1.002 (0.9062,1.1069)	1		0.0809 (-0.0957,0.2575)	1		-8e-04 (-0.0039,0.0022)	1
B4GALT1		-0.0104466			1.226 (1.1247,1.3363)	0.0104724		0.1459 (-4e-04,0.2922)	1		0.0066 (0.0041,0.0091)	0.0005189
B4GAT1	-0.0580106	-0.0383046			1.013 (0.9223,1.112)	1		-0.1324 (-0.2791,0.0142)	1		-0.0065 (-0.0091,-0.004)	0.0010224
BABAM1	-0.0022121				0.9554 (0.8599,1.0614)	1		0.0091 (-0.1432,0.1614)	1		8e-04 (-0.0019,0.0034)	1
BAG3		0.0056479			1.144 (1.0425,1.256)	1		0.2154 (0.071,0.3598)	1		0.0031 (6e-04,0.0056)	1
BAIAP2	-0.0012676	-0.0044771			1.533 (1.423,1.6508)	5.29e-26		0.4823 (0.3386,0.626)	1.56e-07		0.0065 (0.004,0.0091)	0.001158
BAMBI	-0.0015752	-0.0019267			1.095 (1.0044,1.193)	1		-0.0847 (-0.2242,0.0547)	1		-1e-04 (-0.0026,0.0023)	1
BAP18		-0.0014804			1.168 (1.0756,1.2692)	0.665924		0.4625 (0.2886,0.6364)	0.000573		0.007 (0.0041,0.0099)	0.008804
BAX	0.0044154	0.002553			1.159 (1.0598,1.2677)	1		0.064 (-0.076,0.2041)	1		0.0017 (-7e-04,0.0041)	1
BCAM	0.0026347				1.25 (1.1521,1.3556)	0.000227		-0.0081 (-0.1516,0.1354)	1		0.0017 (-8e-04,0.0042)	1
BCAN	0.0295644	0.0093161			0.8688 (0.7922,0.9528)	1		-0.4311 (-0.5855,-0.2768)	0.0001344		-0.0086 (-0.0113,-0.006)	6.33e-07
BCAT2	-0.00165				1.064 (0.9729,1.163)	1		-0.015 (-0.1867,0.1567)	1		0.0018 (-0.0012,0.0047)	1
BCHE	-0.0282092	-0.0525495			1.143 (1.0275,1.2718)	1		0.5516 (0.3913,0.7118)	5.24e-08		0.0028 (1e-04,0.0055)	1
BCL2	0.0044207	0.004273			1.116 (1.0274,1.2113)	1		0.0419 (-0.1272,0.211)	1		0.0019 (-9e-04,0.0047)	1
BCL7A		-0.0015898			0.9899 (0.8955,1.0941)	1		0.0882 (-0.0803,0.2567)	1		0 (-0.0029,0.0028)	1
BGLAP	0.0200675	0.0263054			1.088 (0.9858,1.2007)	1		0.2347 (0.0539,0.4154)	1		0.0051 (0.0019,0.0082)	1
BGN	-0.0017703	-0.0092446			1.018 (0.9286,1.1155)	1		-0.1503 (-0.2859,-0.0148)	1		-0.0032 (-0.0055,-8e-04)	1
BHLHE40	0.0023818	0.0085275			0.9871 (0.8927,1.0915)	1		-0.1145 (-0.2725,0.0436)	1		-7e-04 (-0.0034,0.0021)	1
BIN2	0.0001169				1.013 (0.9262,1.109)	1		0.0523 (-0.0836,0.1882)	1		0.002 (-3e-04,0.0044)	1
BLMH	0.0106573		2.21542		1.161 (1.0665,1.2647)	1		0.1777 (0.0368,0.3187)	1		0.0019 (-6e-04,0.0043)	1
BLNK	-0.0090283	-0.0051946			1.118 (1.0238,1.2201)	1		0.1345 (-0.0371,0.3062)	1		0.0029 (0,0.0058)	1
BMP10	0.0304649	0.0434205			1.173 (1.0552,1.3036)	1		-0.0733 (-0.2527,0.106)	1		0.0013 (-0.0018,0.0043)	1
BMP6		-0.0010046			1.189 (1.0878,1.2989)	0.391548		0.1214 (-0.0211,0.2639)	1		0.0035 (0.0011,0.0059)	1
BMPER		-0.0352227			1.401 (1.3108,1.4966)	6.59e-20		0.6728 (0.4914,0.8542)	1.33e-09		0.0112 (0.008,0.0143)	8.81e-09
BOC	-0.0311914	-0.0582309			0.9411 (0.8579,1.0323)	1		-0.2147 (-0.3603,-0.0691)	1		-0.0027 (-0.0052,-2e-04)	1
BPIFA2	-0.0061122	-0.0071279			0.9007 (0.8122,0.9988)	1		-0.3513 (-0.5285,-0.1741)	0.302427		-0.004 (-0.0071,-9e-04)	1
BPIFB1	-0.0331269	-0.0313829	-4.0575		0.899 (0.8187,0.9871)	1		-0.5771 (-0.7259,-0.4283)	1.03e-10		-0.0076 (-0.0102,-0.0051)	1.83e-05
BRD2		-0.0015641			1.036 (0.9426,1.1396)	1		-0.1401 (-0.2977,0.0174)	1		4e-04 (-0.0023,0.0031)	1
BRD3	-0.0013194	-0.0046037			1.027 (0.9322,1.131)	1		-0.0607 (-0.2272,0.1057)	1		-5e-04 (-0.0034,0.0023)	1
BRDT		0.0116322			1.035 (0.9405,1.1388)	1		0.1348 (-0.034,0.3036)	1		9e-04 (-0.002,0.0038)	1
BRK1	0.0063176				1.082 (0.9892,1.1833)	1		-0.0931 (-0.2358,0.0495)	1		6e-04 (-0.0019,0.003)	1
BRME1	-0.0041137	-0.0057007			0.9401 (0.8425,1.0491)	1		-0.0605 (-0.2337,0.1126)	1		0.0019 (-0.0011,0.0049)	1
BRSK2	-0.0043769	-0.0072483			1.034 (0.9404,1.1358)	1		0.0256 (-0.143,0.1942)	1		9e-04 (-0.002,0.0038)	1
BSG	0.0241528	0.0367054			1.294 (1.1894,1.4079)	6.07e-06		0.1762 (0.023,0.3294)	1		0.0039 (0.0012,0.0065)	1
BST1	-0.0044342	-0.0149991			1.105 (0.9955,1.2269)	1		0.1322 (-8e-04,0.2651)	1		2e-04 (-0.0022,0.0025)	1
BST2	-0.0051382	-0.0114114			1.527 (1.4442,1.6146)	0		0.3227 (0.1762,0.4691)	0.0468397		0.007 (0.0045,0.0096)	0.0002618
BTLA	-0.0008271				0.9674 (0.8719,1.0734)	1		0.0385 (-0.1213,0.1982)	1		-4e-04 (-0.0031,0.0023)	1
BTNL10		0.0008476			0.9375 (0.8375,1.0494)	1		0.077 (-0.1023,0.2562)	1		8e-04 (-0.0024,0.0039)	1
C19ORF12	0.0093492	0.0133697			1.452 (1.3812,1.5269)	0		1.104 (0.9548,1.2538)	0		0.0149 (0.0123,0.0176)	3.03e-25
C1GALT1C1	-0.0027944	-0.0054363			1.067 (0.9778,1.1644)	1		0.043 (-0.1176,0.2037)	1		0.003 (2e-04,0.0059)	1
C1QA	0.006826	0.0021001			1.043 (0.9525,1.1415)	1		-0.1144 (-0.2567,0.0279)	1		0.004 (0.0016,0.0064)	1
C1QBP	0.0008721	0.0001533			1.01 (0.9198,1.1099)	1		-0.0418 (-0.1913,0.1078)	1		7e-04 (-0.0019,0.0033)	1
C1QTNF1	-0.01234	-0.0255727			1.347 (1.254,1.4479)	1.22e-12		0.386 (0.2406,0.5314)	0.0005943		0.0087 (0.0062,0.0112)	3.82e-08
C1QTNF6	0.0076197	0.0066001			1.124 (1.0331,1.2233)	1		0.1153 (-0.0541,0.2847)	1		0.0059 (0.0031,0.0088)	0.126435
C1QTNF9	0.0098597	0.0039865			0.9649 (0.8774,1.0611)	1		-0.0044 (-0.1684,0.1597)	1		-0.0015 (-0.0043,0.0013)	1
C1RL	-0.040694	-0.0504821			1.192 (1.0751,1.3221)	1		0.4126 (0.2364,0.5887)	0.0133185		0.0106 (0.0076,0.0136)	2.17e-08
C1S	-0.029086	-0.0375819			1.213 (1.1014,1.3364)	0.261139		0.4926 (0.3208,0.6643)	6e-05		0.0061 (0.0031,0.009)	0.163574
C2	0.0017359	0.0015979			1.241 (1.1185,1.377)	0.13637		0.2014 (0.071,0.3318)	1		0.0031 (9e-04,0.0053)	1
C2CD2L	0.0021103	0.0047534			1.072 (0.9831,1.1697)	1		0.0386 (-0.1016,0.1788)	1		0.0018 (-6e-04,0.0042)	1
C2ORF69	-0.0057191	-0.0029711			1.071 (0.9844,1.1662)	1		-0.011 (-0.1916,0.1696)	1		0.0011 (-0.0019,0.0042)	1
C3	-0.0025206	-0.0151844			1.245 (1.154,1.3425)	4.13e-05		0.6317 (0.4556,0.8078)	7.37e-09		0.0085 (0.0053,0.0117)	0.0004725
C4BPB	0.0066417	0.007538			0.9012 (0.8206,0.9896)	1		-0.088 (-0.2347,0.0586)	1		-6e-04 (-0.0031,0.002)	1
C7	-0.0114356	-0.0043862	-0.102259		1.519 (1.3755,1.6764)	3.64e-13		0.048 (-0.1339,0.23)	1		0.0049 (0.0018,0.008)	1
C8B	-0.0191196	-0.018901			1.018 (0.9236,1.1216)	1		0.0985 (-0.0714,0.2685)	1		8e-04 (-0.0022,0.0037)	1
CA1	0.0051848				0.9919 (0.9045,1.0878)	1		0.2048 (0.0665,0.3431)	1		0.0017 (-7e-04,0.004)	1
CA11	0.0003322	0.0119226			1.005 (0.9188,1.1003)	1		-0.1674 (-0.3082,-0.0266)	1		-0.003 (-0.0054,-6e-04)	1
CA12	0.0141686	0.0102603			1.07 (0.981,1.1669)	1		-0.175 (-0.3214,-0.0285)	1		0.0021 (-4e-04,0.0047)	1
CA14	0.0652062	0.0655568	19.2361		0.7808 (0.709,0.8599)	0.0014855		-0.7833 (-0.938,-0.6287)	1.59e-19		-0.0104 (-0.0131,-0.0077)	9.44e-11
CA2	-0.0017416	-0.0038198			1.039 (0.9483,1.139)	1		0.2587 (0.1179,0.3996)	0.937085		0.0014 (-0.001,0.0038)	1
CA4	0.111386	0.156894	0.332718		0.9701 (0.8873,1.0607)	1		-0.295 (-0.4379,-0.1521)	0.15396		6e-04 (-0.0019,0.003)	1
CA6	0.0068584	0.0002189	2.38289		0.7899 (0.7157,0.8718)	0.0081758		-0.2403 (-0.3937,-0.0869)	1		-0.0064 (-0.009,-0.0037)	0.0057067
CACNA1C	-0.0050665	-0.0153932			1.002 (0.9082,1.106)	1		-0.0562 (-0.225,0.1126)	1		-2e-04 (-0.0032,0.0027)	1
CACNA1H	0.0059171	0.0113262			1.044 (0.9538,1.1435)	1		-0.1184 (-0.2761,0.0393)	1		6e-04 (-0.002,0.0033)	1
CACNB1		0.0037603			1.024 (0.9289,1.128)	1		-0.0335 (-0.1914,0.1243)	1		9e-04 (-0.0019,0.0037)	1
CADPS	0.0050088	0.0147345			1.085 (0.9988,1.1779)	1		-0.1927 (-0.3653,-0.0201)	1		-0.0018 (-0.0047,0.001)	1
CALB1	-0.0417778	-0.043649	-1.39535		0.9621 (0.8794,1.0525)	1		-0.1077 (-0.2574,0.0419)	1		2e-04 (-0.0024,0.0027)	1
CALB2	-0.0049964	-0.0210623			1.116 (1.0397,1.1977)	1		0.2308 (0.1029,0.3588)	1		0.0044 (0.0022,0.0065)	0.166496
CALCB	-0.0196411	-0.0238378	-0.021439		0.9836 (0.8917,1.085)	1		-0.0182 (-0.1985,0.1622)	1		7e-04 (-0.0024,0.0038)	1
CALCOCO1	0.0058401	0.0120029			1.034 (0.946,1.1302)	1		0.0437 (-0.0881,0.1754)	1		8e-04 (-0.0015,0.0031)	1
CAMKK1	0.0028755				1.023 (0.935,1.1198)	1		0.0322 (-0.0997,0.1641)	1		0.0012 (-0.0011,0.0035)	1
CAMLG	0.0077636	0.0065868			1.041 (0.9467,1.1439)	1		-0.1103 (-0.2764,0.0558)	1		-1e-04 (-0.0029,0.0028)	1
CAPN3		-0.0195179			1.027 (0.9331,1.1307)	1		0.0721 (-0.0856,0.2299)	1		0.0017 (-0.0011,0.0044)	1
CAPS	-0.0038792	-0.0004134			1.061 (0.9722,1.1584)	1		0.112 (-0.0558,0.2798)	1		0.0026 (-4e-04,0.0055)	1
CASP10	0.0005111				1.002 (0.913,1.0991)	1		0.1035 (-0.0313,0.2383)	1		0.0018 (-5e-04,0.0041)	1
CASQ2	-0.0064976	-0.005595			1.008 (0.9134,1.1114)	1		-0.093 (-0.2544,0.0685)	1		-0.0018 (-0.0045,9e-04)	1
CBLIF	-0.0039265	-0.0026572			1.011 (0.9278,1.1012)	1		0.0336 (-0.1174,0.1847)	1		4e-04 (-0.0021,0.003)	1
CBLN4	0.0016289	0.0098008			1.105 (1.0164,1.2009)	1		0.5765 (0.4356,0.7173)	3.81e-12		0.0046 (0.0022,0.007)	0.565115
CBS	-0.0013423				1.497 (1.4117,1.5864)	0		0.7573 (0.5906,0.9241)	2.72e-15		0.0077 (0.0049,0.0106)	0.0003384
CBX2	-0.0038833	-0.001847			0.9189 (0.8204,1.0292)	1		0.1277 (-0.0378,0.2932)	1		7e-04 (-0.0023,0.0037)	1
CCAR2	-0.0021954	-0.0015542			1.112 (1.028,1.2037)	1		-0.0059 (-0.1679,0.156)	1		0.0018 (-0.0011,0.0047)	1
CCDC134	0.0051892	0.0030276			1.058 (0.964,1.1611)	1		0.0661 (-0.0991,0.2312)	1		0.0021 (-7e-04,0.005)	1
CCDC28A	0.0038537	0.0114062			0.951 (0.8617,1.0496)	1		-0.268 (-0.4389,-0.0972)	1		-0.0011 (-0.0041,0.0018)	1
CCDC80	-0.0379924	-0.0354297			1.231 (1.122,1.3506)	0.0324634		0.2787 (0.1136,0.4437)	1		0.0065 (0.0036,0.0093)	0.0237559
CCER2	-0.0128862	-0.0189735			1.02 (0.9257,1.1246)	1		-0.0396 (-0.2096,0.1305)	1		0.0041 (0.0011,0.0071)	1
CCL11	-0.0157342	-0.016071			0.9536 (0.8681,1.0477)	1		-0.0706 (-0.2149,0.0737)	1		-5e-04 (-0.003,0.002)	1
CCL13	-0.000957	-0.0039642			1.062 (0.9711,1.1614)	1		0.1784 (0.0364,0.3203)	1		0.0046 (0.0021,0.007)	0.710046
CCL14	-0.0051865	-0.0130325			1.122 (1.0339,1.2176)	1		-0.0171 (-0.1664,0.1322)	1		0.0053 (0.0027,0.0079)	0.166759
CCL15		-0.001699			1.238 (1.1392,1.3449)	0.0013622		0.2462 (0.0999,0.3924)	1		0.0058 (0.0033,0.0083)	0.0202991
CCL16	0.0036721	0.0002891			1.383 (1.2525,1.5272)	4.23e-07		0.6593 (0.5041,0.8145)	3.25e-13		0.0103 (0.0077,0.013)	1.42e-10
CCL18		0.0018687			1.181 (1.0947,1.2748)	0.0522746		0.3453 (0.2012,0.4895)	0.0079566		0.0082 (0.0058,0.0107)	2.48e-07
CCL19	-0.0059042	-0.0094192			1.176 (1.0928,1.2659)	0.0439469		0.1659 (0.0222,0.3096)	1		0.0042 (0.0018,0.0067)	1
CCL21	-0.0040554	-0.0175108			1.139 (1.0608,1.2237)	1		0.1268 (-0.0236,0.2772)	1		0.0045 (0.0019,0.007)	1
CCL22	-0.0105966	-0.0099635			1.218 (1.1194,1.3246)	0.0130497		0.4069 (0.2588,0.555)	0.0002211		0.0096 (0.0071,0.0121)	3.57e-10
CCL23	0.0205694	0.0254375			1.229 (1.1262,1.3421)	0.0113403		0.1689 (0.0233,0.3145)	1		0.0045 (0.002,0.007)	1
CCL25	-0.0046595	-0.0145196			1.152 (1.0521,1.2625)	1		-0.0098 (-0.153,0.1334)	1		-0.0024 (-0.0048,1e-04)	1
CCL26	0.0002672	0.0020035			1.025 (0.9397,1.1185)	1		0.1287 (-0.013,0.2703)	1		0.0028 (3e-04,0.0052)	1
CCL27	-0.0056957				1.137 (1.0356,1.2472)	1		0.1159 (-0.0268,0.2587)	1		0.0017 (-8e-04,0.0041)	1
CCL28	-0.0133489	-0.0182112	-2.42834		0.9993 (0.9126,1.0942)	1		-0.0476 (-0.1827,0.0875)	1		0 (-0.0023,0.0024)	1
CCL3	-0.012724	-0.0117346			1.192 (1.1281,1.2596)	1.23e-06		0.5773 (0.4067,0.7479)	1.08e-07		0.0131 (0.0101,0.0161)	4.16e-14
CCL4	0.0002156	0.0017183			1.19 (1.111,1.2754)	0.0021646		0.4358 (0.2884,0.5833)	2.15e-05		0.0078 (0.0053,0.0104)	6.62e-06
CCL7		-0.0039907			1.225 (1.1384,1.3178)	0.0001642		0.3257 (0.1774,0.4739)	0.0494987		0.0062 (0.0036,0.0087)	0.0065044
CCL8	0.0037186	0.0031158			1.079 (0.9843,1.182)	1		0.287 (0.1475,0.4265)	0.163866		0.0041 (0.0016,0.0065)	1
CCN2	0.0120224	0.0103898			1.122 (1.0261,1.2261)	1		0.1305 (-0.0082,0.2692)	1		0.0027 (3e-04,0.0051)	1
CCN3	0.0094993				1.108 (1.014,1.2109)	1		0.3331 (0.167,0.4991)	0.250766		0.0083 (0.0054,0.0112)	4.38e-05
CCN4	-0.0093196	-0.0170093			1.252 (1.1528,1.3589)	0.0002601		0.2519 (0.1096,0.3941)	1		0.0055 (0.003,0.0079)	0.0336907
CCN5	0.0161485	0.0168456			1.162 (1.0534,1.2808)	1		0.017 (-0.1398,0.1738)	1		0.0051 (0.0025,0.0078)	0.441806
CCND2	0.0013494	0.0050291			0.9514 (0.8638,1.0479)	1		0.0152 (-0.1586,0.1889)	1		0.0024 (-6e-04,0.0054)	1
CD101	-0.0095084	-0.0069283			1.163 (1.0549,1.2831)	1		0.0233 (-0.1336,0.1802)	1		0.001 (-0.0017,0.0036)	1
CD109	-0.0035768				1.024 (0.9343,1.1219)	1		-0.0672 (-0.2087,0.0743)	1		-0.0016 (-0.0041,8e-04)	1
CD14		0.0090543			1.168 (1.0686,1.2763)	1		-0.017 (-0.1672,0.1333)	1		2e-04 (-0.0024,0.0028)	1
CD163	0.0032667				1.47 (1.3522,1.5991)	5.9e-16		0.4684 (0.3218,0.615)	1.22e-06		0.0098 (0.0072,0.0123)	2.79e-10
CD164	0.0047984	0.007317			1.118 (1.0585,1.1812)	0.191508		0.0215 (-0.1147,0.1576)	1		0.0012 (-0.0012,0.0035)	1
CD164L2	-0.002462	-0.0046767			0.9627 (0.8729,1.0617)	1		-0.1236 (-0.2965,0.0493)	1		0.0014 (-0.0015,0.0044)	1
CD177		-0.0020327			1.026 (0.9368,1.1227)	1		0.0145 (-0.127,0.156)	1		4e-04 (-0.0021,0.0028)	1
CD1C	0.0278426	0.0742163			0.9855 (0.901,1.0781)	1		-0.0696 (-0.215,0.0759)	1		0 (-0.0026,0.0025)	1
CD2	-0.0067681	-0.0223247			1.04 (0.9509,1.1373)	1		0.1545 (-0.0229,0.3318)	1		0.0031 (0,0.0062)	1
CD200R1	-0.0215064	-0.0383987			1.084 (0.9917,1.1851)	1		0.1491 (0.0069,0.2914)	1		0.001 (-0.0014,0.0035)	1
CD209	-0.0291569	-0.0454552			0.9741 (0.8889,1.0675)	1		-0.0375 (-0.176,0.1009)	1		0.0023 (0,0.0047)	1
CD22	0.0145291	0.0115396			1.277 (1.1742,1.3887)	3.26e-05		0.3307 (0.1837,0.4778)	0.0311485		0.0067 (0.0042,0.0092)	0.0003945
CD244	0.0094385	0.0142799			1.239 (1.1407,1.3455)	0.0010753		0.1647 (0.0258,0.3036)	1		0.0034 (0.001,0.0058)	1
CD274	0.0184071	0.0212896			1.277 (1.183,1.3791)	1.15e-06		0.3236 (0.1801,0.467)	0.0293077		0.0067 (0.0042,0.0092)	0.0003144
CD276	-0.0006376				1.124 (1.0256,1.2314)	1		-0.1312 (-0.2832,0.0207)	1		0.0016 (-0.001,0.0042)	1
CD300C	0.0081924	0.0160124			1.345 (1.2347,1.466)	3.65e-08		0.2803 (0.1301,0.4306)	0.749201		0.0098 (0.0071,0.0124)	8.64e-10
CD300E	-0.0039384	-0.0092903			1.317 (1.2082,1.4348)	1.03e-06		0.3097 (0.1531,0.4662)	0.312946		0.0109 (0.0082,0.0136)	1.04e-11
CD300LF		0.0007754			1.135 (1.0313,1.2486)	1		0.114 (-0.0341,0.2622)	1		0.0043 (0.0017,0.0069)	1
CD300LG	-0.0264707	-0.020298			0.9828 (0.8945,1.0799)	1		-0.4232 (-0.5773,-0.2692)	0.0002219		-0.0029 (-0.0056,-3e-04)	1
CD33	0.0003842				1.136 (1.0343,1.2487)	1		0.016 (-0.1194,0.1514)	1		0.0015 (-8e-04,0.0039)	1
CD36		0.0074108			1.095 (0.9952,1.2049)	1		0.3073 (0.136,0.4786)	1		0.0049 (0.0019,0.0078)	1
CD38	0.0619546	0.0706135	10.7392		1.138 (1.0227,1.2654)	1		0.4695 (0.2902,0.6488)	0.0008748		0.0096 (0.0065,0.0127)	6.55e-06
CD3D	0.0046791	0.0006934			0.9161 (0.8178,1.0261)	1		-0.1481 (-0.3206,0.0244)	1		-7e-04 (-0.0037,0.0023)	1
CD3E	0.0019926				1.027 (0.9389,1.1232)	1		-0.0921 (-0.2716,0.0873)	1		9e-04 (-0.0022,0.0039)	1
CD4	-3.29e-05	-0.0067767			1.236 (1.166,1.3096)	2.63e-09		0.3718 (0.214,0.5296)	0.0116354		0.0082 (0.0055,0.0109)	8.1e-06
CD40		0.0009694			1.19 (1.0971,1.2912)	0.0818744		0.1923 (0.0524,0.3321)	1		0.0039 (0.0015,0.0063)	1
CD5		-0.0071211			1.119 (1.0266,1.2197)	1		0.1465 (0.0034,0.2897)	1		0.0067 (0.0043,0.0092)	0.0002688
CD55	0.0255022	0.0401887			1.074 (0.9863,1.1705)	1		-0.0136 (-0.1502,0.123)	1		0.0012 (-0.0011,0.0036)	1
CD58	0.1023	0.15496			1.07 (0.9778,1.1715)	1		-0.1886 (-0.331,-0.0462)	1		-0.0027 (-0.0052,-3e-04)	1
CD5L	-0.0243972	-0.020126			1.152 (1.0469,1.2674)	1		0.0658 (-0.1048,0.2365)	1		0.0016 (-0.0014,0.0045)	1
CD6	-0.0034638				1.109 (1.012,1.2153)	1		0.3011 (0.1583,0.4439)	0.106741		0.0038 (0.0013,0.0063)	1
CD7	0.006885	0.0192011			1.028 (0.9312,1.1359)	1		0.0694 (-0.1103,0.2491)	1		0.0035 (5e-04,0.0066)	1
CD70	0.0006842				1.081 (0.9855,1.1861)	1		0.0233 (-0.1195,0.1662)	1		0.0019 (-5e-04,0.0044)	1
CD72	0.0107667	0.0174332			1.396 (1.2785,1.5243)	2.99e-10		0.3594 (0.1782,0.5407)	0.300674		0.0095 (0.0065,0.0126)	3.09e-06
CD79B	-0.019054	-0.0156928			1.159 (1.0639,1.2624)	1		-0.0711 (-0.2221,0.0798)	1		0.0066 (0.004,0.0092)	0.0024773
CD83	0.0446658	0.0279157			1.304 (1.2013,1.4144)	5.8e-07		0.3842 (0.2244,0.5439)	0.0072992		0.0092 (0.0065,0.012)	1.26e-07
CD84	-0.010527	-0.0023646			1.048 (0.9584,1.1458)	1		0.0908 (-0.0481,0.2296)	1		0.0013 (-0.0011,0.0037)	1
CD8A	-0.0028282	-0.0039483			1.223 (1.1238,1.3312)	0.009254		0.3487 (0.2095,0.4879)	0.0027414		0.0053 (0.0029,0.0077)	0.0439177
CD93	0.0244488	0.0392535			1.006 (0.9183,1.1024)	1		-0.275 (-0.4261,-0.1239)	1		0 (-0.0027,0.0026)	1
CD99	0.154209	0.230596	14.2449		1.121 (1.0155,1.2379)	1		-0.0127 (-0.1825,0.1571)	1		0.0011 (-0.0018,0.004)	1
CD99L2	-0.003195				1.292 (1.1837,1.4109)	3.01e-05		0.6551 (0.5038,0.8063)	8.19e-14		0.0104 (0.0078,0.0129)	8.07e-12
CDA		-0.0027319			1.177 (1.0737,1.2908)	1		0.2835 (0.1137,0.4533)	1		0.0023 (-6e-04,0.0052)	1
CDC123		0.0021567			0.9406 (0.8436,1.0487)	1		0.0311 (-0.1346,0.1968)	1		0.0016 (-0.0012,0.0045)	1
CDC27	-0.012876	-0.0130983			1.1 (1.0115,1.1966)	1		-0.0037 (-0.1405,0.1332)	1		-1e-04 (-0.0025,0.0022)	1
CDCP1		0.00581			1.539 (1.4171,1.6722)	4.84e-21		0.7823 (0.608,0.9567)	5.97e-15		0.0098 (0.0068,0.0128)	5e-07
CDH1	-0.0031808	-0.0003247			1.137 (1.0534,1.2278)	1		0.3156 (0.1684,0.4628)	0.0786602		0.0059 (0.0033,0.0085)	0.0257574
CDH15	0.0114118	0.0040686	2.19744		1.282 (1.1837,1.3894)	3.35e-06		0.715 (0.5479,0.8821)	1.95e-13		0.0087 (0.0059,0.0116)	9.72e-06
CDH17		-0.0014369			0.9967 (0.9097,1.0921)	1		-0.0103 (-0.1535,0.1329)	1		1e-04 (-0.0024,0.0025)	1
CDH2	-0.0464563	-0.0380006			1.719 (1.5647,1.8876)	3.32e-26		1.013 (0.8579,1.1686)	2.76e-33		0.0168 (0.0141,0.0194)	1.09e-30
CDH3	0.0244018	0.0492019			1.04 (0.9535,1.1347)	1		-0.1379 (-0.2851,0.0094)	1		7e-04 (-0.0019,0.0032)	1
CDH4	0.0027007	0.0064952			1.017 (0.9219,1.121)	1		0.0429 (-0.1077,0.1935)	1		3e-04 (-0.0023,0.0029)	1
CDH5	-0.0047285	-0.0001887	1.10357		1.048 (0.9594,1.1452)	1		-0.0142 (-0.1531,0.1247)	1		0.0031 (7e-04,0.0055)	1
CDH6	0.0127434	0.0120285			1.311 (1.2065,1.4238)	4.45e-07		-0.0906 (-0.235,0.0538)	1		7e-04 (-0.0018,0.0032)	1
CDHR2			0.10045		2.581 (2.2945,2.9044)	0		1.558 (1.3891,1.7278)	0		0.0134 (0.0104,0.0164)	7.47e-15
CDHR5	0.0009423	0.0066135			1.247 (1.1272,1.3802)	0.0551966		0.586 (0.445,0.7269)	1.4e-12		0.0074 (0.005,0.0099)	1.02e-05
CDK1	0.0091261	0.0111928			0.9954 (0.901,1.0998)	1		0.2252 (0.0528,0.3977)	1		0.0018 (-0.0011,0.0048)	1
CDK5RAP3	0.0045996	0.0108244			1.057 (0.9632,1.1592)	1		-0.0294 (-0.1955,0.1368)	1		5e-04 (-0.0023,0.0033)	1
CDNF	0.0032068	0.0192942			1.039 (0.9509,1.1355)	1		-0.0767 (-0.2203,0.067)	1		0.0011 (-0.0014,0.0035)	1
CDSN	-0.0219869	-0.0200268			1.033 (0.9461,1.1285)	1		-0.1128 (-0.2534,0.0278)	1		7e-04 (-0.0017,0.0032)	1
CEACAM1	0.0204349	0.0067106			1.71 (1.5595,1.8746)	9.52e-27		0.384 (0.2275,0.5404)	0.0045437		0.004 (0.0012,0.0068)	1
CEACAM18	-0.0068901	-0.0030796			1.103 (1.0156,1.1982)	1		-0.043 (-0.2058,0.1197)	1		0.0015 (-0.0014,0.0043)	1
CEACAM19	-0.0110928	-0.031526			1.096 (0.9975,1.2035)	1		0.0979 (-0.0704,0.2663)	1		0.0027 (-2e-04,0.0056)	1
CEACAM3	0.0022783	0.0009923			1.094 (1.0072,1.189)	1		0.0162 (-0.1189,0.1513)	1		0.0023 (0,0.0047)	1
CEACAM5	-0.009811	-0.0133339			1.089 (0.9905,1.197)	1		-0.1019 (-0.2571,0.0533)	1		2e-04 (-0.0026,0.0029)	1
CEACAM6	-0.0155407	-0.0299526			1.092 (0.9963,1.1969)	1		-0.0105 (-0.1965,0.1754)	1		0.0022 (-0.0011,0.0054)	1
CEBPB	0.0028629	0.0012808			1.093 (1.003,1.1917)	1		0.1585 (0.0194,0.2977)	1		0.0024 (0,0.0047)	1
CELA3A	0.0027352	0.0044249			1.066 (0.9788,1.1599)	1		-0.0432 (-0.1853,0.0988)	1		-0.001 (-0.0035,0.0014)	1
CELSR2	0.0082377	0.0095433			1.057 (0.9599,1.165)	1		0.1635 (-0.0141,0.3411)	1		0.0034 (3e-04,0.0064)	1
CEMIP2		0.001255			1.128 (1.0509,1.2116)	1		0.5099 (0.3419,0.6779)	8.81e-06		0.0038 (9e-04,0.0066)	1
CEND1	-0.0037186	-0.0067944			1.069 (0.981,1.1658)	1		-0.1455 (-0.3168,0.0259)	1		-0.0029 (-0.0059,1e-04)	1
CENPF	0.0013301				1.064 (0.9665,1.1709)	1		0.1781 (0.0165,0.3398)	1		0.001 (-0.0018,0.0037)	1
CENPJ	-0.0021425	-0.0034903			1.061 (0.9682,1.162)	1		-0.1176 (-0.2817,0.0464)	1		-4e-04 (-0.0031,0.0023)	1
CEP112	0.0036916	0.0031385			1.085 (0.9969,1.1815)	1		0.2908 (0.1088,0.4727)	1		0.0021 (-0.0011,0.0052)	1
CEP152	0.0057265	0.0056175			1.023 (0.9295,1.1259)	1		0.0087 (-0.1628,0.1802)	1		0.0022 (-7e-04,0.0051)	1
CEP170	-0.0013808				1.056 (0.9579,1.1641)	1		0.0195 (-0.1428,0.1818)	1		6e-04 (-0.0022,0.0035)	1
CEP20		0.0030554			1.134 (1.0387,1.238)	1		0.1357 (-0.0032,0.2746)	1		0.0042 (0.0018,0.0066)	1
CES1	0.0058137	0.0038866			1.636 (1.5202,1.7606)	0		1.63 (1.4773,1.7831)	0		0.0144 (0.0117,0.0171)	2.59e-21
CFB	-0.0266936	-0.0242971			1.32 (1.187,1.4684)	0.0009047		0.6919 (0.5116,0.8721)	2.03e-10		0.0115 (0.0085,0.0146)	9.6e-10
CFD	-0.0043136	-0.0373697			1.12 (1.0281,1.2201)	1		0.4323 (0.2435,0.621)	0.0216403		0.0078 (0.0046,0.0111)	0.0059258
CFHR2		-0.0017616			1.104 (0.9969,1.2233)	1		0.1345 (-0.0296,0.2986)	1		0.0017 (-0.0011,0.0045)	1
CFHR4	0.0032685	0.0010531			0.943 (0.8583,1.0361)	1		-0.1055 (-0.2683,0.0572)	1		2e-04 (-0.0026,0.003)	1
CFP	0.0127113				1.092 (1.0075,1.1845)	1		0.7318 (0.5578,0.9059)	7.27e-13		0.0069 (0.0036,0.0102)	0.135931
CGA	-0.014789	-0.0215543	-6.01671		1.229 (1.0697,1.4123)	1		0.1239 (-0.0636,0.3114)	1		-0.002 (-0.0052,0.0012)	1
CGB3_CGB5_CGB8	-0.0047584	-0.0021785			0.9968 (0.8982,1.1062)	1		0.0802 (-0.0746,0.235)	1		-0.0011 (-0.0037,0.0015)	1
CHCHD10		0.0008939			1.318 (1.2215,1.4213)	2.81e-09		0.4345 (0.239,0.6299)	0.0396808		0.0067 (0.0034,0.01)	0.227507
CHCHD6	0.0001595	0.0054369			1.245 (1.1779,1.3161)	2.75e-11		0.2521 (0.0655,0.4387)	1		0.0028 (-5e-04,0.006)	1
CHGA	0.0243277	0.0235712			1.056 (0.9693,1.1501)	1		-0.1399 (-0.3381,0.0584)	1		0.0035 (1e-04,0.0069)	1
CHGB	-0.0104232	-0.0084898			0.9486 (0.8665,1.0384)	1		-0.3381 (-0.4885,-0.1877)	0.0312946		-0.0017 (-0.0044,9e-04)	1
CHI3L1	-0.0104118	-0.011511			1.493 (1.3777,1.6176)	3.97e-19		0.5961 (0.4308,0.7615)	5.39e-09		0.009 (0.0061,0.0119)	2.42e-06
CHL1	-0.0035144				0.8552 (0.7785,0.9395)	1		-0.2452 (-0.3853,-0.1052)	1		-0.0029 (-0.0053,-5e-04)	1
CHM	-0.0035481	-0.0082721			1.028 (0.9327,1.1324)	1		0.0019 (-0.1629,0.1667)	1		-4e-04 (-0.0032,0.0024)	1
CHP1	0.0001112				1.052 (0.9589,1.1542)	1		-0.0166 (-0.1755,0.1424)	1		0.002 (-7e-04,0.0048)	1
CHRDL1	-0.0269448	-0.0379622			1.22 (1.1096,1.341)	0.113958		-0.0164 (-0.1801,0.1473)	1		0.0048 (0.002,0.0076)	1
CHRDL2	-0.0041447	-0.000458			1.243 (1.1377,1.3577)	0.0041872		0.2822 (0.1437,0.4206)	0.191245		0.005 (0.0026,0.0073)	0.0974487
CHRM1	0.015168	0.0145337			1.033 (0.94,1.1342)	1		-0.0307 (-0.1868,0.1254)	1		0.001 (-0.0017,0.0037)	1
CILP	-0.0081477	-0.0068712			1.278 (1.153,1.4163)	0.0086462		0.371 (0.1927,0.5493)	0.135142		0.0061 (0.003,0.0092)	0.336907
CKAP4	0.0394866	0.0611892			1.294 (1.206,1.3893)	2.51e-09		0.1267 (-0.0367,0.2901)	1		0.0081 (0.0053,0.0109)	5.45e-05
CKMT1A_CKMT1B	-0.0118213	-0.016608			1.091 (0.9949,1.1964)	1		-0.0422 (-0.1808,0.0964)	1		0.0028 (4e-04,0.0053)	1
CLASP1		0.0129085			0.9027 (0.8079,1.0087)	1		-0.0102 (-0.1615,0.1411)	1		0.0014 (-0.0012,0.0039)	1
CLC	-0.0014808				1.047 (0.9575,1.1444)	1		0.0059 (-0.1375,0.1493)	1		0.0023 (-2e-04,0.0048)	1
CLEC10A	-0.0090914		-0.0368166		1.094 (0.9985,1.1993)	1		-0.0745 (-0.2187,0.0697)	1		0.0012 (-0.0013,0.0037)	1
CLEC11A	0.0229344	0.0247438			1.294 (1.1828,1.4162)	5.78e-05		0.0589 (-0.0788,0.1966)	1		0.0041 (0.0017,0.0064)	1
CLEC14A		0.0066091			1.095 (1.0013,1.1983)	1		-0.0373 (-0.1938,0.1193)	1		0.0015 (-0.0012,0.0042)	1
CLEC3B	0.0648622	0.104623			0.9607 (0.8676,1.0639)	1		0.2237 (0.0492,0.3982)	1		5e-04 (-0.0024,0.0035)	1
CLEC4A	-0.0124751	-0.014228			0.8776 (0.8043,0.9575)	1		-0.3932 (-0.5366,-0.2497)	0.0002367		-0.0056 (-0.0081,-0.0032)	0.0229728
CLEC4C	0.0128569	0.0124803			0.977 (0.8939,1.0679)	1		0.0248 (-0.116,0.1657)	1		6e-04 (-0.0018,0.0031)	1
CLEC4D	0.0027552	0.0001432			1.224 (1.1193,1.3377)	0.02626		0.3184 (0.168,0.4687)	0.0987052		0.009 (0.0064,0.0115)	3.8e-08
CLEC4G	-0.0104456	-0.0073444			1.083 (0.9889,1.1854)	1		0.336 (0.1912,0.4809)	0.0162609		0.003 (5e-04,0.0055)	1
CLEC5A	-0.0448895	-0.0623587	-5.79079		1.049 (0.9564,1.1508)	1		-0.1458 (-0.3022,0.0106)	1		0.0031 (4e-04,0.0058)	1
CLEC6A	0.0121871	0.0193756			1.261 (1.1583,1.3729)	0.0002597		0.1082 (-0.0343,0.2508)	1		0.005 (0.0025,0.0075)	0.269554
CLEC7A		0.0033013			1.148 (1.0333,1.2744)	1		-0.0502 (-0.1958,0.0954)	1		0.0016 (-8e-04,0.0041)	1
CLIC5	-0.0031787				0.9903 (0.899,1.0909)	1		-0.1316 (-0.3102,0.0469)	1		0.0018 (-0.0014,0.005)	1
CLINT1		-0.0021484			1.02 (0.9281,1.1212)	1		-0.0523 (-0.2062,0.1015)	1		-4e-04 (-0.0029,0.0021)	1
CLNS1A	-0.0038336				0.9398 (0.8476,1.0421)	1		-0.0945 (-0.2595,0.0706)	1		-1e-04 (-0.0029,0.0027)	1
CLPP		-0.0062976			1.06 (0.9703,1.1586)	1		0.1091 (-0.0309,0.249)	1		0.0021 (-3e-04,0.0045)	1
CLPS	-0.0006165	-2.44e-05			1.005 (0.9199,1.0971)	1		-0.2788 (-0.4233,-0.1343)	0.458462		-0.0036 (-0.0061,-0.0012)	1
CLSPN	0.0027226				1.027 (0.9404,1.1212)	1		0.0032 (-0.125,0.1314)	1		-5e-04 (-0.0026,0.0017)	1
CLSTN1	0.0004568				1.033 (0.944,1.1306)	1		0.12 (-0.0187,0.2586)	1		0.0015 (-9e-04,0.0038)	1
CLSTN2	-0.0111516	-0.0143685			1.316 (1.2268,1.4113)	4.61e-11		0.123 (-0.0153,0.2614)	1		0.005 (0.0026,0.0074)	0.104637
CLSTN3	0.0443922	0.0604791			1.27 (1.163,1.3866)	0.0002907		0.3094 (0.1473,0.4714)	0.539986		0.0067 (0.004,0.0095)	0.0068872
CNDP1		0.0001943			1.028 (0.9378,1.1273)	1		0.3006 (0.1586,0.4426)	0.0992311		1e-04 (-0.0024,0.0026)	1
CNGB3	0.0089981	0.0109372			0.9844 (0.8878,1.0915)	1		-0.0299 (-0.2015,0.1417)	1		-0.001 (-0.004,0.002)	1
CNPY2	-0.0018656	-0.002118			0.9715 (0.884,1.0677)	1		0.0494 (-0.0856,0.1844)	1		0.0024 (2e-04,0.0047)	1
CNTN1	-0.0117456	-0.0213032			0.9225 (0.838,1.0155)	1		-0.3175 (-0.4725,-0.1624)	0.176869		-0.0048 (-0.0074,-0.0021)	1
CNTN2	-0.0021294	-0.0014821			1.064 (0.9717,1.1653)	1		-0.1435 (-0.2835,-0.0035)	1		-0.003 (-0.0054,-6e-04)	1
CNTN3	0.0085393		4.99326		1.536 (1.382,1.7064)	4.45e-12		0.9303 (0.7733,1.0874)	3.14e-27		0.0028 (1e-04,0.0056)	1
CNTN5	-0.0096791	-0.0032482			0.9965 (0.9053,1.0969)	1		-0.3015 (-0.4532,-0.1498)	0.288986		-0.0058 (-0.0084,-0.0032)	0.0330478
COCH		-0.0003838			1.295 (1.1828,1.418)	6.71e-05		0.4082 (0.2372,0.5792)	0.0087455		0.0031 (1e-04,0.006)	1
COL15A1		-0.0100725			1.136 (1.0338,1.2484)	1		0.5095 (0.3184,0.7007)	0.00054		0.005 (0.0017,0.0084)	1
COL1A1	0.0003329	0.000108			1.106 (1.0107,1.2111)	1		-0.2066 (-0.3487,-0.0645)	1		-0.002 (-0.0044,4e-04)	1
COL28A1	0.0055876	0.0056891			0.9906 (0.9016,1.0885)	1		-0.0248 (-0.1976,0.148)	1		2e-04 (-0.0027,0.0032)	1
COL2A1	0.0084805	0.0143771			1.118 (1.0175,1.2284)	1		0.0115 (-0.1529,0.1759)	1		-8e-04 (-0.0036,0.002)	1
COL3A1	0.017146	0.0249434			1.29 (1.1874,1.401)	4.82e-06		0.2632 (0.0886,0.4379)	1		0.0031 (1e-04,0.0062)	1
COL4A1	0.0020493	0.0166473			1.259 (1.1559,1.3705)	0.0003524		-0.601 (-0.7472,-0.4549)	2.88e-12		-0.0038 (-0.0063,-0.0013)	1
COL5A1	0.0020246				1.405 (1.3288,1.4849)	1.21e-29		0.0968 (-0.0799,0.2735)	1		0.0048 (0.0018,0.0079)	1
COL6A3	0.0894822	0.107169			1.314 (1.2129,1.4244)	7.48e-08		0.4901 (0.3196,0.6605)	5.41e-05		0.0133 (0.0103,0.0162)	2.75e-15
COL9A1	0.0468717	0.0682323	1.82555		0.992 (0.9076,1.0841)	1		-0.1763 (-0.3286,-0.024)	1		-0.0039 (-0.0065,-0.0013)	1
COL9A2	0.0058504	0.0077111			0.993 (0.8982,1.0979)	1		0.1884 (0.0289,0.3479)	1		0.0013 (-0.0014,0.0041)	1
COLEC12	-0.0263737				1.22 (1.1147,1.3359)	0.0475117		0.3688 (0.1957,0.5419)	0.0883613		0.0083 (0.0054,0.0113)	9.49e-05
COMMD1		-0.0019321			1.145 (1.0409,1.2606)	1		0.1536 (-0.0126,0.3198)	1		0.0019 (-0.001,0.0048)	1
COMMD9	-0.0069415	-0.0216574			1.029 (0.9395,1.127)	1		-0.0726 (-0.2317,0.0866)	1		-0.0019 (-0.0046,9e-04)	1
COPB2		-0.0012906			1.007 (0.9131,1.1107)	1		0.0365 (-0.1207,0.1937)	1		7e-04 (-0.002,0.0034)	1
COPE	-0.0122003	-0.0137752			1.066 (0.9815,1.157)	1		0.0667 (-0.0642,0.1977)	1		0.0025 (3e-04,0.0046)	1
COQ7		0.0076857			1.307 (1.228,1.3918)	1.45e-13		0.0328 (-0.1222,0.1879)	1		-8e-04 (-0.0036,0.002)	1
CORO1A		0.006204			1.085 (0.9937,1.1842)	1		0.052 (-0.088,0.1919)	1		0.002 (-4e-04,0.0044)	1
COX5B	-0.002233				1.137 (1.0449,1.238)	1		0.0742 (-0.0635,0.212)	1		0.0026 (2e-04,0.0049)	1
CPA1	-0.0036973	-0.0089266			1.159 (1.0674,1.2583)	1		0.3132 (0.172,0.4544)	0.0411418		0.0018 (-6e-04,0.0043)	1
CPA4	-0.0293733	-0.0359406			1.084 (0.9819,1.1964)	1		0.1793 (0.0052,0.3533)	1		0.0028 (-2e-04,0.0059)	1
CPE	-0.0011872				0.983 (0.8999,1.0739)	1		-0.0956 (-0.2321,0.0408)	1		-0.0026 (-0.005,-2e-04)	1
CPM	0.0012475				1.756 (1.6019,1.9254)	1.02e-29		1.286 (1.1327,1.4402)	0		0.014 (0.0114,0.0167)	5.94e-21
CPOX	0.0002828				1.214 (1.1256,1.3086)	0.0013666		0.1404 (-0.0317,0.3125)	1		-5e-04 (-0.0034,0.0023)	1
CPQ		-0.0073655			1.276 (1.1538,1.411)	0.0060398		0.6505 (0.4709,0.83)	4.45e-09		0.0017 (-0.0014,0.0048)	1
CPXM2	-0.0021525				1.266 (1.162,1.3803)	0.0002208		0.342 (0.1674,0.5167)	0.366711		0.0053 (0.0024,0.0083)	1
CR1	0.0152523	0.0082515			1.225 (1.1364,1.3206)	0.0003436		0.3063 (0.1393,0.4734)	0.960169		0.0066 (0.0038,0.0094)	0.0156473
CR2		0.0044075			1.146 (1.0477,1.2526)	1		0.0459 (-0.096,0.1879)	1		0.0049 (0.0024,0.0073)	0.298921
CREB3	0.0032987	0.0053501			1.019 (0.9232,1.125)	1		-0.0091 (-0.1887,0.1704)	1		-1e-04 (-0.0031,0.003)	1
CREBZF	0.0025774				0.876 (0.7884,0.9732)	1		-0.0083 (-0.1774,0.1608)	1		-5e-04 (-0.0034,0.0024)	1
CREG1	0.0150432	0.0340774			1.511 (1.4,1.6313)	1.06e-22		1.141 (0.9966,1.2859)	0		0.0134 (0.0109,0.0159)	2.25e-21
CRELD1	-0.0214515	-0.0358875			1.489 (1.3549,1.6362)	3.94e-13		0.8321 (0.6503,1.014)	1.49e-15		0.0098 (0.0067,0.0129)	2.16e-06
CRH	0.0089113	0.0110375			0.8633 (0.7858,0.9484)	1		-0.2313 (-0.3664,-0.0961)	1		-0.0031 (-0.0055,-7e-04)	1
CRHR1	-0.0027291	-0.0048748			1.076 (0.9884,1.1711)	1		0.0817 (-0.0512,0.2145)	1		0.0011 (-0.0011,0.0033)	1
CRIM1	-0.0110716	-0.008029			1.34 (1.2295,1.4596)	6.86e-08		-0.1969 (-0.3463,-0.0476)	1		0.0025 (0,0.0051)	1
CRIP2	0.0120416	0.0089709			1.171 (1.0731,1.2776)	1		0.3446 (0.1902,0.4989)	0.0360283		0.0056 (0.0029,0.0083)	0.138298
CRISP2	0.0323092	0.0336685	7.5549		0.8759 (0.793,0.9674)	1		-0.2999 (-0.4616,-0.1383)	0.812316		-0.0027 (-0.0055,1e-04)	1
CRLF1	-0.0380211	-0.0459742			1.257 (1.1448,1.3798)	0.0046314		0.2805 (0.1362,0.4248)	0.408496		0.0057 (0.0033,0.0082)	0.0162229
CRNN	-0.0111357	-0.0100728			0.8615 (0.7856,0.9448)	1		-0.0683 (-0.2148,0.0782)	1		-0.002 (-0.0045,6e-04)	1
CRTAC1	-0.0177763	-0.0209554			0.8845 (0.8077,0.9686)	1		-0.1389 (-0.2866,0.0089)	1		-0.001 (-0.0036,0.0015)	1
CRTAM	0.0015629				1.228 (1.1223,1.3434)	0.022476		-0.1416 (-0.2842,0.001)	1		0.0047 (0.0023,0.0072)	0.515149
CRTAP	0.0046732	0.0092292			1.024 (0.9294,1.1291)	1		-0.0557 (-0.2178,0.1065)	1		0.001 (-0.0018,0.0037)	1
CRYBB2	-0.0153904	-0.02057			1.023 (0.9352,1.1198)	1		0.0361 (-0.1403,0.2125)	1		-7e-04 (-0.0037,0.0023)	1
CRYM		0.0011611			1.172 (1.0797,1.2723)	0.435086		0.3115 (0.1539,0.4692)	0.31879		0.0049 (0.0021,0.0077)	1
CSDE1	7.58e-05				1.037 (0.9407,1.1437)	1		0.0068 (-0.1523,0.1658)	1		0.0015 (-0.0012,0.0042)	1
CSF1	-0.0185422				1.427 (1.3136,1.5493)	9.37e-14		0.3613 (0.2056,0.5169)	0.0161557		0.0118 (0.0092,0.0144)	5.67e-15
CSF2RA	-0.0027817				1.078 (0.987,1.1764)	1		0.0899 (-0.0423,0.2221)	1		0.0015 (-9e-04,0.0038)	1
CSF2RB		-0.004878			1.017 (0.92,1.1236)	1		-0.0331 (-0.1998,0.1337)	1		0.0011 (-0.0018,0.0039)	1
CSF3	5.42e-05				1.062 (0.969,1.164)	1		0.2974 (0.1534,0.4414)	0.153405		0.0064 (0.0039,0.0089)	0.0011516
CSF3R		0.0027578			1.176 (1.0889,1.271)	0.110364		0.164 (-0.0056,0.3337)	1		0.0061 (0.0032,0.0089)	0.0984422
CSH1	0.0065841	0.0051054			0.9882 (0.8966,1.0891)	1		0.0252 (-0.1185,0.169)	1		0.0024 (0,0.0048)	1
CSNK1D		-0.0006504			1.071 (0.9742,1.1784)	1		0.02 (-0.1468,0.1868)	1		0.001 (-0.0019,0.0039)	1
CSNK2A1	-0.0028231				0.9335 (0.8449,1.0315)	1		-0.252 (-0.4201,-0.084)	1		-0.0028 (-0.0056,1e-04)	1
CSPG4		-0.0078702			1.089 (0.9826,1.2076)	1		-0.1953 (-0.3775,-0.0131)	1		-0.0013 (-0.0044,0.0018)	1
CSPG5		-0.0001833			0.9326 (0.8398,1.0358)	1		-0.1584 (-0.3238,0.007)	1		-0.0015 (-0.0043,0.0013)	1
CSRP3	0.0003158				1.06 (0.9654,1.165)	1		-0.0326 (-0.2052,0.1401)	1		4e-04 (-0.0026,0.0033)	1
CST5	-0.0088045	-0.0102494			0.9933 (0.9042,1.0911)	1		-0.0872 (-0.2321,0.0578)	1		-7e-04 (-0.0032,0.0018)	1
CST6	-0.005418	-0.0059383			0.9266 (0.8447,1.0164)	1		-0.11 (-0.2599,0.0399)	1		1e-04 (-0.0025,0.0027)	1
CST7		0.0023222			1.134 (1.0503,1.2233)	1		0.0715 (-0.0789,0.222)	1		0.004 (0.0014,0.0066)	1
CSTB	0.0075613	0.0148029			1.257 (1.1515,1.3727)	0.0009517		0.3143 (0.1636,0.465)	0.129678		0.0067 (0.0041,0.0093)	0.0010578
CTAG1A_CTAG1B		-0.0027626			0.9786 (0.886,1.0808)	1		0.1716 (0.0231,0.3201)	1		0.0025 (-1e-04,0.0051)	1
CTBS	0.0024957	0.0100512			1.293 (1.1685,1.431)	0.001949		0.5471 (0.3965,0.6977)	3.9e-09		0.008 (0.0055,0.0105)	1.08e-06
CTF1	0.0020438	0.0039589			1.068 (0.978,1.1662)	1		0.0643 (-0.0725,0.2011)	1		9e-04 (-0.0014,0.0032)	1
CTHRC1	-0.0400391	-0.0336005			1.272 (1.1544,1.4005)	0.0032259		0.3516 (0.1547,0.5485)	1		0.0082 (0.0049,0.0116)	0.005356
CTLA4	-0.0082489	-0.0063378			0.9613 (0.8707,1.0613)	1		0.1452 (-0.0217,0.3121)	1		0.0012 (-0.0016,0.0041)	1
CTNNA1		0.0068516			1.056 (0.9659,1.1543)	1		-0.0741 (-0.2253,0.077)	1		6e-04 (-0.0019,0.0031)	1
CTSD		0.0163054			1.489 (1.4077,1.5743)	0		1.173 (1.0124,1.3346)	0		0.0143 (0.0114,0.0172)	1.13e-18
CTSE	0.012284	0.0197826			1.105 (1.0053,1.2147)	1		0.125 (-0.045,0.295)	1		0 (-0.0029,0.0029)	1
CTSF	-0.019896	-0.0207018			1.055 (0.962,1.1575)	1		0.2815 (0.1383,0.4247)	0.343627		-0.001 (-0.0035,0.0015)	1
CTSS	-0.0052024				1.212 (1.0944,1.3418)	0.642548		0.3622 (0.2023,0.522)	0.0268561		0.008 (0.0053,0.0107)	3.13e-05
CTSZ		0.0119952			1.416 (1.2958,1.5466)	3.95e-11		0.7896 (0.644,0.9352)	1.34e-22		0.0117 (0.0092,0.0143)	6.89e-16
CUZD1	-0.0012823	-0.0033509			0.937 (0.8445,1.0396)	1		0.0479 (-0.1172,0.213)	1		0.0014 (-0.0014,0.0042)	1
CXCL1	0.0007121				1.103 (1.0125,1.2018)	1		0.0948 (-0.0457,0.2352)	1		0.0022 (-2e-04,0.0046)	1
CXCL11	-0.0052752	-0.0030513			1.222 (1.1296,1.3226)	0.001771		0.1609 (0.0159,0.3058)	1		0.0071 (0.0046,0.0096)	6.05e-05
CXCL12		0.0074484			1.023 (0.9348,1.1196)	1		-0.263 (-0.4,-0.126)	0.498493		-0.0021 (-0.0044,3e-04)	1
CXCL13	-0.002565	-0.0015583			1.13 (1.047,1.2188)	1		0.1605 (0.0145,0.3065)	1		0.0052 (0.0028,0.0077)	0.0861113
CXCL14	-0.0057246	-0.0011998			1.041 (0.9502,1.1414)	1		0.0313 (-0.1129,0.1754)	1		-9e-04 (-0.0034,0.0015)	1
CXCL16	-0.0402713	-0.0642367	-0.417317		1.149 (1.0513,1.2559)	1		0.3115 (0.1661,0.4569)	0.0791862		0.0035 (0.001,0.006)	1
CXCL17	-0.0134749	-0.0288663			1.098 (0.9886,1.2204)	1		0.2826 (0.0957,0.4695)	1		0.0027 (-6e-04,0.006)	1
CXCL3	0.0056845	0.0083019			1.12 (1.0231,1.227)	1		0.1201 (-0.0159,0.256)	1		0.0019 (-5e-04,0.0042)	1
CXCL5	-0.0109643	-0.0088654	-0.352544		1.145 (1.0462,1.2542)	1		0.2102 (0.0683,0.3521)	1		0.0019 (-6e-04,0.0043)	1
CXCL9	-0.0244614	-0.0093991			1.241 (1.1419,1.3496)	0.0011519		0.0733 (-0.0743,0.2208)	1		0.0059 (0.0034,0.0085)	0.0142681
CYTH3		0.000604			0.9677 (0.8734,1.0722)	1		-0.1513 (-0.3137,0.011)	1		3e-04 (-0.0025,0.0031)	1
CYTL1	0.0445374	0.0942021			0.9429 (0.8537,1.0413)	1		0.0308 (-0.1452,0.2069)	1		-0.0016 (-0.0047,0.0014)	1
DAND5		0.0010711			1.014 (0.9215,1.116)	1		-0.0786 (-0.2514,0.0943)	1		-0.0018 (-0.0047,0.0012)	1
DAPP1	-0.0001418				1.063 (0.9693,1.1659)	1		0.0397 (-0.0967,0.1761)	1		0.0014 (-0.001,0.0037)	1
DARS1	-0.0152725	-0.0067921			0.991 (0.9053,1.0848)	1		0.0146 (-0.12,0.1493)	1		8e-04 (-0.0015,0.0031)	1
DBH	0.0042708	0.0074466			1.099 (0.989,1.2202)	1		0.0231 (-0.1408,0.187)	1		-8e-04 (-0.0036,0.0019)	1
DCBLD2	-0.0139569	-0.0216677			1.028 (0.9346,1.1298)	1		-0.5284 (-0.6796,-0.3771)	2.49e-08		-0.0034 (-0.006,-8e-04)	1
DCC	0.0213353	0.0116626			1.005 (0.9112,1.1081)	1		-0.0502 (-0.2156,0.1152)	1		4e-04 (-0.0023,0.0032)	1
DCDC2C	-0.0005643	-0.0028508			1.061 (0.9653,1.167)	1		-0.0039 (-0.1734,0.1656)	1		-2e-04 (-0.0031,0.0026)	1
DCLRE1C	0.0019175				0.9785 (0.8852,1.0816)	1		-0.0738 (-0.2385,0.0909)	1		-0.0014 (-0.0042,0.0015)	1
DCTN6	0.0010167	0.0042531			1.06 (0.9722,1.1558)	1		0.0166 (-0.1182,0.1514)	1		0.0017 (-6e-04,0.0041)	1
DCUN1D1	0.0010276				1.015 (0.919,1.1206)	1		-0.1104 (-0.262,0.0412)	1		8e-04 (-0.0018,0.0034)	1
DDA1	0.0003133				0.9764 (0.8829,1.0798)	1		0.2925 (0.1322,0.4527)	1		8e-04 (-0.002,0.0035)	1
DDAH1		0.0065014			1.45 (1.3481,1.5598)	5.06e-20		0.5545 (0.4078,0.7013)	4.5e-10		0.0081 (0.0056,0.0107)	1.32e-06
DDC	0.0138322	0.0239259			1.273 (1.1693,1.3868)	8.23e-05		0.0159 (-0.1302,0.162)	1		-3e-04 (-0.0028,0.0023)	1
DDR1	0.009681	0.0535396			1.323 (1.2178,1.4365)	9.32e-08		0.1373 (-0.007,0.2817)	1		0.0046 (0.0021,0.007)	0.928904
DDT	-0.0008826				1.262 (1.1566,1.3761)	0.0004666		0.6188 (0.4527,0.7849)	1.04e-09		0.006 (0.0032,0.0088)	0.0899976
DDX1	0.0026034	0.0124956			0.9528 (0.8575,1.0587)	1		-0.103 (-0.2772,0.0712)	1		0.0033 (3e-04,0.0062)	1
DDX25	0.0126175	0.0070467			0.9661 (0.8707,1.0719)	1		-0.0831 (-0.2398,0.0735)	1		5e-04 (-0.0021,0.0031)	1
DDX4	0.0006347				0.9371 (0.8402,1.0452)	1		-0.0605 (-0.2179,0.0969)	1		-8e-04 (-0.0035,0.002)	1
DEFA1_DEFA1B		-0.0010463			1.158 (1.0703,1.2535)	0.777252		0.1411 (-0.0083,0.2905)	1		0.008 (0.0055,0.0105)	2.06e-06
DEFB104A_DEFB104B	0.0217039	0.0266491	1.45651		1.044 (0.9456,1.1517)	1		-0.0285 (-0.1849,0.1279)	1		0.0014 (-0.0014,0.0041)	1
DEFB116	0.0019369	0.008012			1.021 (0.9283,1.1229)	1		0.0446 (-0.1133,0.2025)	1		0.0031 (3e-04,0.0058)	1
DEFB118	0.0008129				1.004 (0.9104,1.1073)	1		-0.0152 (-0.1709,0.1405)	1		-0.0015 (-0.0043,0.0014)	1
DENND2B	0.002946	0.0038292			0.9573 (0.8599,1.0657)	1		-0.1109 (-0.2777,0.0558)	1		-6e-04 (-0.0035,0.0022)	1
DENR	-0.0058121	-0.0061375			1.113 (1.0168,1.2178)	1		0.0723 (-0.0928,0.2374)	1		0 (-0.0027,0.0028)	1
DFFA	-0.0042821	-0.004258			1.114 (1.0207,1.2158)	1		0.1726 (0.0341,0.311)	1		0.0026 (2e-04,0.005)	1
DGKA		-0.0029803			1.087 (0.9873,1.1959)	1		0.152 (-0.023,0.327)	1		0.0019 (-0.0011,0.0049)	1
DGKZ	0.0055895				1.01 (0.9224,1.105)	1		-0.0288 (-0.163,0.1054)	1		-0.0012 (-0.0035,0.001)	1
DHPS		-0.0013296			1.201 (1.1259,1.2811)	7.89e-05		0.2694 (0.0969,0.4419)	1		0.0044 (0.0014,0.0074)	1
DHRS4L2	0.0049304				1.109 (1.0168,1.2089)	1		0.0598 (-0.1079,0.2275)	1		6e-04 (-0.0023,0.0035)	1
DIPK2B	0.0235333	0.02327			1.076 (0.976,1.186)	1		-0.0872 (-0.2569,0.0825)	1		-0.0019 (-0.0048,0.001)	1
DKK3	0.0402856	0.0562413			1.035 (0.9436,1.1361)	1		-0.3065 (-0.4577,-0.1553)	0.210033		-0.0033 (-0.0059,-7e-04)	1
DKK4	0.0116943	0.0103354			1.165 (1.0713,1.2676)	1		0.0543 (-0.0915,0.2001)	1		0.0031 (6e-04,0.0056)	1
DKKL1	1.42e-05	0.0017809			0.9469 (0.8657,1.0356)	1		0.0057 (-0.1372,0.1486)	1		0 (-0.0025,0.0025)	1
DLK1	-0.0155772	-0.0256259			1.184 (1.0816,1.2965)	0.745987		0.4848 (0.3402,0.6294)	1.6e-07		0.0064 (0.0039,0.0089)	0.00162
DLL1	0.0170109	0.0371102			1.255 (1.1504,1.3696)	0.000945		-0.1492 (-0.306,0.0075)	1		0.0079 (0.0052,0.0106)	3.81e-05
DMP1	-0.0211351	-0.0179082			0.8819 (0.8031,0.9685)	1		-0.3097 (-0.4893,-0.1302)	1		-0.0048 (-0.0079,-0.0017)	1
DNAJB8		8.69e-05			1.063 (0.9763,1.1567)	1		0.026 (-0.1049,0.1568)	1		7e-04 (-0.0015,0.0029)	1
DNER	-0.0527482	-0.0550348			0.8519 (0.7777,0.9333)	1		-0.0072 (-0.1562,0.1417)	1		-0.003 (-0.0055,-4e-04)	1
DNLZ	0.0002424	0.0009054			1.014 (0.9175,1.1213)	1		-0.0844 (-0.2483,0.0795)	1		7e-04 (-0.0021,0.0035)	1
DNPEP	-0.0030413				1.27 (1.1506,1.4007)	0.0057417		0.3432 (0.1771,0.5092)	0.152441		0.0029 (1e-04,0.0058)	1
DOC2B		-0.0036669			1.004 (0.9128,1.1033)	1		0.0445 (-0.1234,0.2125)	1		-1e-04 (-0.0033,0.0031)	1
DOCK9	-0.0009575	-0.0015951			0.9473 (0.8523,1.053)	1		0.0022 (-0.1669,0.1713)	1		6e-04 (-0.0024,0.0035)	1
DPEP1	-0.0022312				1.012 (0.9241,1.1092)	1		-0.1653 (-0.3056,-0.0249)	1		-0.0024 (-0.0048,0)	1
DPP10	-0.0040772	-0.0054051			1.251 (1.162,1.3459)	7.01e-06		-0.2509 (-0.401,-0.1008)	1		-0.0024 (-0.005,2e-04)	1
DPP4	0.0330511	0.0110975			1.297 (1.1902,1.4127)	8.18e-06		0.2682 (0.1273,0.409)	0.561316		1e-04 (-0.0024,0.0025)	1
DPP7	0.0024682	0.002129			1.314 (1.2048,1.4329)	1.98e-06		0.3951 (0.2543,0.5358)	0.0001151		0.0051 (0.0027,0.0075)	0.110306
DRAXIN	-0.003168	-0.0085977			1.125 (1.0292,1.2303)	1		-0.0754 (-0.2215,0.0706)	1		0.003 (5e-04,0.0055)	1
DSC2	-0.0117665				1.253 (1.1502,1.364)	0.0006548		-0.1748 (-0.3369,-0.0128)	1		0.0048 (0.002,0.0076)	1
DSCAM	0.0025765	0.0128711			1.185 (1.0773,1.3032)	1		0.0631 (-0.1101,0.2363)	1		0.0025 (-5e-04,0.0054)	1
DSG2	-0.0267621	-0.0580818			0.8707 (0.7925,0.9566)	1		-0.787 (-0.9391,-0.6348)	2.1e-20		-0.0047 (-0.0073,-0.002)	1
DSG3			0.25573		1.037 (0.9448,1.1381)	1		-0.0156 (-0.1653,0.134)	1		0.0016 (-0.0011,0.0042)	1
DTX2	-0.0004281	-0.001515			1.006 (0.9112,1.1117)	1		0.0052 (-0.1546,0.1649)	1		8e-04 (-0.0019,0.0035)	1
DTX3	0.0268153	0.036576			1.089 (0.9932,1.1943)	1		0.1886 (0.0291,0.3481)	1		0.0023 (-4e-04,0.0051)	1
DUOX2	0.0020455	0.0030158			1.003 (0.9161,1.0972)	1		-0.0333 (-0.1746,0.108)	1		-1e-04 (-0.0025,0.0023)	1
DUSP13	0.0088706	0.0059267			1.024 (0.9308,1.1269)	1		0.034 (-0.1308,0.1987)	1		-2e-04 (-0.0031,0.0026)	1
DUSP29	-0.0005313				1.056 (0.9635,1.1577)	1		-0.0962 (-0.276,0.0836)	1		-0.001 (-0.0042,0.0021)	1
DYNLT3	-0.0106736	-0.015419			1.029 (0.9348,1.132)	1		0.083 (-0.0849,0.251)	1		0.0023 (-6e-04,0.0052)	1
EBI3_IL27	0.0032271	0.0042511			1.192 (1.0892,1.3035)	0.382198		-0.2496 (-0.3939,-0.1052)	1		0.0042 (0.0017,0.0067)	1
ECSCR	-0.0012132				1.008 (0.9116,1.1139)	1		-0.1266 (-0.2894,0.0362)	1		0.0015 (-0.0012,0.0043)	1
EDA2R	-0.0587382	-0.0472783	-6.16866		1.252 (1.13,1.3874)	0.0509597		-0.0613 (-0.2454,0.1229)	1		0.0025 (-7e-04,0.0056)	1
EDDM3B			2.68196		0.8809 (0.7456,1.0408)	1		-0.3561 (-0.6279,-0.0844)	1		8e-04 (-0.0039,0.0055)	1
EDIL3	0.0275315	0.0348967			1.035 (0.9426,1.1366)	1		-0.098 (-0.2441,0.0481)	1		-0.0027 (-0.0051,-2e-04)	1
EDN1	-0.0259563	-0.0147501			1.221 (1.1084,1.344)	0.147853		0.19 (0.005,0.3751)	1		0.0053 (0.0021,0.0084)	1
EDNRB		0.0040067			1.086 (0.9975,1.1826)	1		0.1612 (-0.0049,0.3272)	1		-0.0011 (-0.0039,0.0017)	1
EFCAB14	-0.0043636	-0.014853			1.114 (1.028,1.2067)	1		0.1599 (-0.0333,0.3531)	1		0.0033 (1e-04,0.0066)	1
EFEMP1	-0.0805113	-0.107554	-4.98495		1.236 (1.1265,1.3563)	0.0223387		-0.2108 (-0.3721,-0.0495)	1		0.0063 (0.0035,0.0091)	0.0301258
EFNA1	-0.0193774	-0.0252356			1.204 (1.1099,1.3071)	0.0242205		0.0577 (-0.1022,0.2175)	1		0.0057 (0.0029,0.0084)	0.146597
EFNA4	-0.0200067	-0.0282333			1.339 (1.2437,1.4419)	2.88e-11		0.4059 (0.242,0.5698)	0.0036467		0.0116 (0.0088,0.0144)	3.42e-12
EGFL7	0.004797	0.0151101			1.155 (1.0594,1.2583)	1		0.1163 (-0.0268,0.2594)	1		0.0028 (3e-04,0.0053)	1
EGFLAM	-0.0195157	-0.0104974			1.142 (1.0447,1.2481)	1		0.1943 (0.0237,0.365)	1		0.0028 (-1e-04,0.0058)	1
EGFR	0.0092444	0.0044344			0.9123 (0.8329,0.9993)	1		-0.0926 (-0.2384,0.0532)	1		-0.0063 (-0.0088,-0.0037)	0.00322
EIF1AX		0.0051524			0.9698 (0.8755,1.0742)	1		-0.0835 (-0.2432,0.0761)	1		6e-04 (-0.0022,0.0033)	1
EIF2AK3		-0.0022168			0.9749 (0.8819,1.0778)	1		0.0766 (-0.0939,0.2471)	1		0.0015 (-0.0014,0.0044)	1
EIF4G3		-0.0044781			1.031 (0.9374,1.134)	1		0.0284 (-0.1378,0.1946)	1		9e-04 (-0.002,0.0037)	1
EIF5	-0.0075373	-0.0012952			1.039 (0.9489,1.138)	1		0.0379 (-0.1395,0.2153)	1		-9e-04 (-0.0041,0.0022)	1
EIF5A		0.0060313			1.003 (0.9167,1.0982)	1		0.0035 (-0.126,0.1331)	1		-0.0011 (-0.0033,0.0011)	1
ELN	-0.0387884	-0.0237286	-1.38568		1.115 (0.9836,1.2632)	1		0.0894 (-0.148,0.3268)	1		0.0014 (-0.0027,0.0054)	1
ENAH		-0.0009672			1.159 (1.0657,1.2598)	1		0.1482 (0.0094,0.287)	1		0.0046 (0.0023,0.007)	0.411418
ENDOU	0.0208114	0.0261519	1.91991		0.9989 (0.8955,1.1143)	1		0.1208 (-0.0745,0.3162)	1		0.0021 (-0.0013,0.0055)	1
ENG		0.0092514			1.181 (1.0826,1.2881)	0.515149		-0.046 (-0.185,0.093)	1		0.0014 (-0.001,0.0038)	1
ENO2		-0.0005031			1.059 (0.9692,1.1578)	1		0.075 (-0.0626,0.2126)	1		0.0017 (-6e-04,0.0041)	1
ENO3	-0.0013299	-0.0065373			1.383 (1.278,1.497)	2.61e-12		0.8977 (0.7202,1.0752)	2.41e-19		0.0072 (0.0041,0.0103)	0.0167431
ENOPH1	-0.0035735	-0.0025677			0.8957 (0.7956,1.0083)	1		-0.0729 (-0.2336,0.0877)	1		-2e-04 (-0.0029,0.0025)	1
ENPP2			-0.927761		1.438 (1.3102,1.5787)	6.18e-11		0.2832 (0.1074,0.459)	1		0.0072 (0.0042,0.0102)	0.0072582
ENPP5	0.0271456	0.0273438	3.66317		0.9279 (0.851,1.0118)	1		-0.1891 (-0.329,-0.0491)	1		-0.0038 (-0.0062,-0.0014)	1
ENPP7	-0.0057157	-0.0065873			1.553 (1.4152,1.7041)	4.52e-17		0.6565 (0.5121,0.8009)	2.16e-15		0.007 (0.0045,0.0095)	8.99e-05
ENTPD2	0.0021042	0.0148922			1.424 (1.3216,1.5352)	6.11e-17		0.0405 (-0.0951,0.1761)	1		4e-04 (-0.002,0.0027)	1
ENTPD5	0.0233207	0.0164			0.9305 (0.8512,1.0172)	1		0.0121 (-0.1281,0.1523)	1		1e-04 (-0.0023,0.0025)	1
ENTPD6		0.0026244			1.312 (1.1804,1.4574)	0.0013295		0.0543 (-0.088,0.1966)	1		0.0019 (-6e-04,0.0044)	1
EP300	-0.0139617	-0.0117529			1.062 (0.9683,1.1651)	1		0.0886 (-0.0928,0.27)	1		6e-04 (-0.0025,0.0037)	1
EPHA10		0.0008081			0.9607 (0.8727,1.0576)	1		-0.1021 (-0.2381,0.0339)	1		-2e-04 (-0.0026,0.0023)	1
EPHA4		-0.0234267			1.086 (0.9854,1.1968)	1		0.0905 (-0.0886,0.2696)	1		0.0011 (-0.0019,0.0042)	1
EPHB4	0.0109209				1.114 (1.0244,1.2115)	1		-0.1712 (-0.3262,-0.0162)	1		0.0019 (-8e-04,0.0046)	1
EPHB6	-0.006528				1.066 (0.9763,1.1639)	1		-0.1146 (-0.2634,0.0341)	1		0.0013 (-0.0013,0.0038)	1
EPHX2	-0.0022646	-0.0031482			1.207 (1.1258,1.2935)	0.0003249		0.2083 (0.0757,0.341)	1		0.0029 (7e-04,0.0052)	1
EPN1	0.0007844				1.018 (0.9252,1.1195)	1		-0.1415 (-0.3052,0.0222)	1		5e-04 (-0.0023,0.0032)	1
EPO	-0.0011541	-0.00325			1.065 (0.9794,1.1585)	1		0.0478 (-0.0961,0.1917)	1		0.0036 (0.0011,0.006)	1
EPPK1	-0.0008043	-0.0035571			1.063 (0.9663,1.1694)	1		-0.0524 (-0.2248,0.1201)	1		9e-04 (-0.0021,0.0039)	1
EPS8L2	0.0173864	0.0101757			1.487 (1.3885,1.5921)	1.83e-26		0.5451 (0.3961,0.6941)	2.54e-09		0.0091 (0.0065,0.0117)	1.96e-08
ERBB2	0.0023558				1.633 (1.5041,1.7734)	4.98e-28		1.251 (1.102,1.3991)	0		0.0131 (0.0105,0.0157)	4.05e-19
ERBB3	-0.0077633	-0.023383			1.207 (1.1061,1.317)	0.0701572		0.3496 (0.2018,0.4974)	0.0107033		-4e-04 (-0.003,0.0021)	1
ERC2	-0.0018159	-0.0032941			0.9565 (0.8617,1.0616)	1		0.0128 (-0.1607,0.1863)	1		0.0013 (-0.0017,0.0042)	1
EREG	-0.0037904	-0.0078705			1.095 (1.0053,1.1935)	1		0.1564 (0.0166,0.2962)	1		0.0038 (0.0014,0.0062)	1
ERI1	-0.0123447	-0.0041068			1.062 (0.967,1.1664)	1		0.2756 (0.0981,0.4531)	1		0.0042 (0.0012,0.0072)	1
ERMAP	0.0085667	0.0145644			1.077 (0.9731,1.1928)	1		0.1794 (8e-04,0.358)	1		0.0051 (0.0021,0.0082)	1
ERN1	-0.0092557	-0.0042539			1.204 (1.1087,1.308)	0.0307979		0.6616 (0.4934,0.8297)	4.85e-11		0.0074 (0.0046,0.0103)	0.0012874
ERP44	0.0026424	0.0009229			1.183 (1.0825,1.2929)	0.607484		0.4333 (0.2947,0.5719)	2.81e-06		0.0066 (0.0042,0.009)	0.0002163
ERVV_1	-0.0009022				0.8843 (0.7922,0.9872)	1		-0.1633 (-0.3227,-0.0039)	1		-0.0031 (-0.0058,-4e-04)	1
ESAM	0.0314298				1.111 (1.0191,1.2111)	1		-0.0541 (-0.2041,0.0957)	1		0.0042 (0.0016,0.0067)	1
ESM1		-0.0128183			1.035 (0.9434,1.1362)	1		-0.4675 (-0.6166,-0.3184)	2.53e-06		-0.0016 (-0.0042,0.001)	1
ESPL1	-0.0011115				1.034 (0.9402,1.1382)	1		0.0421 (-0.1196,0.2038)	1		9e-04 (-0.0018,0.0037)	1
EXTL1		-0.0024244			0.9951 (0.9026,1.0971)	1		-0.0471 (-0.2171,0.1228)	1		-0.0017 (-0.0046,0.0013)	1
EZR	-0.0419858	-0.0574197			1.263 (1.1613,1.3731)	0.0001409		0.4733 (0.3321,0.6144)	1.61e-07		0.0047 (0.0023,0.0071)	0.477747
F10	-0.0064186				1.096 (1.0072,1.1935)	1		0.5854 (0.4088,0.7621)	2.79e-07		0.0048 (0.0018,0.0078)	1
F11		-0.0093206			0.9657 (0.8675,1.075)	1		0.321 (0.1309,0.5112)	1		-5e-04 (-0.0039,0.0028)	1
F13B	0.0092931	0.0256152			1.031 (0.9358,1.1368)	1		0.1926 (0.0236,0.3616)	1		5e-04 (-0.0024,0.0034)	1
F2	-0.0076861	-0.0110181			1.012 (0.9187,1.1153)	1		0.3435 (0.1763,0.5107)	0.167811		6e-04 (-0.0023,0.0034)	1
F2R		-0.0049982			1.121 (1.0255,1.2254)	1		0.1112 (-0.0288,0.2513)	1		0.0026 (2e-04,0.005)	1
F7	0.0068537	0.0192646			1.342 (1.2252,1.4696)	6.79e-07		0.624 (0.477,0.771)	3.45e-13		0.0059 (0.0034,0.0085)	0.0199923
F9	-0.0085834				1.33 (1.2119,1.4591)	5.15e-06		0.8301 (0.6808,0.9795)	8.38e-24		0.0113 (0.0087,0.0139)	7.8e-14
FABP2	0.0011382	0.0027673			1.052 (0.9644,1.1486)	1		-0.1286 (-0.2714,0.0142)	1		0.0027 (3e-04,0.0052)	1
FABP4	-0.0292725	-0.0394443			1.575 (1.4354,1.7281)	2.41e-18		1.11 (0.9302,1.2892)	8.66e-30		0.0176 (0.0145,0.0206)	8.24e-25
FABP5	0.0126104	0.0034661			1.222 (1.1186,1.3351)	0.025772		0.4234 (0.2811,0.5657)	1.71e-05		0.0053 (0.0028,0.0077)	0.0810271
FABP6	0.0012144	0.0030356			0.9606 (0.8776,1.0515)	1		-0.1333 (-0.2782,0.0115)	1		-9e-04 (-0.0034,0.0016)	1
FABP9	0.0018445	0.0017391			0.9296 (0.8482,1.0188)	1		-0.1268 (-0.2702,0.0165)	1		-0.0013 (-0.0038,0.0011)	1
FAM171A2	0.0016876	0.0022259			1.109 (1.0131,1.2146)	1		-0.0854 (-0.2478,0.077)	1		-0.0022 (-0.005,6e-04)	1
FAM171B	-0.0025711	-0.0128603			1.006 (0.9142,1.1076)	1		-0.111 (-0.2782,0.0562)	1		8e-04 (-0.002,0.0037)	1
FAM20A	0.0163232	0.0181236			1.348 (1.2415,1.4646)	3.89e-09		1.014 (0.8371,1.1907)	2.85e-25		0.0107 (0.0075,0.0138)	6.75e-08
FAM3B	0.0229569	0.0409435			1.069 (0.9766,1.1706)	1		-0.0316 (-0.1753,0.1122)	1		9e-04 (-0.0016,0.0034)	1
FAM3C		0.0042924			1.169 (1.0696,1.2769)	1		0.0577 (-0.0977,0.2132)	1		0.0046 (0.0019,0.0073)	1
FAP	-0.0257973	-0.0269648			1.176 (1.076,1.2844)	1		0.4516 (0.3062,0.597)	3.6e-06		9e-04 (-0.0016,0.0035)	1
FAS	0.011998	0.0047839			1.225 (1.1583,1.2952)	3.21e-09		0.316 (0.1723,0.4598)	0.0488266		0.0063 (0.0038,0.0087)	0.0017932
FBLN2	0.0516375	0.0835323			1.307 (1.1924,1.4328)	3.18e-05		0.2995 (0.1098,0.4892)	1		0.0041 (8e-04,0.0074)	1
FBN2	0.0084042	0.0047836			0.9424 (0.8547,1.039)	1		-0.0155 (-0.1795,0.1485)	1		0.0028 (1e-04,0.0056)	1
FCAMR	-0.0084685	-0.0035474			1.742 (1.586,1.9127)	1.01e-27		0.9768 (0.7957,1.1579)	3.28e-22		0.0158 (0.0127,0.0188)	6.48e-20
FCER1A		-0.0160674			1.004 (0.9104,1.1082)	1		-0.104 (-0.2688,0.0607)	1		9e-04 (-0.0021,0.0038)	1
FCER2		0.0072104			1.186 (1.0898,1.2906)	0.226835		0.1316 (-0.0133,0.2766)	1		0.0049 (0.0025,0.0074)	0.260935
FCGR2A	-0.0108561	-0.0119871			1.162 (1.0484,1.287)	1		0.0866 (-0.0527,0.2258)	1		0.0041 (0.0016,0.0065)	1
FCGR2B		-0.0028592			1.124 (1.033,1.2219)	1		0.3885 (0.2476,0.5294)	0.0001999		0.0021 (-3e-04,0.0046)	1
FCGR3B	-0.0036616	-0.0052885			1.152 (1.0486,1.2653)	1		0.0188 (-0.1201,0.1577)	1		0.0047 (0.0023,0.0071)	0.409372
FCN2	-0.0034142	-0.0060515			1.039 (0.9459,1.1404)	1		0.3368 (0.1971,0.4765)	0.006931		0.005 (0.0026,0.0075)	0.125821
FCRL1	0.002188	0.004123			1.174 (1.074,1.2826)	1		0.0829 (-0.059,0.2248)	1		0.0049 (0.0025,0.0073)	0.210209
FCRL2	0.0034827	0.0040314			1.16 (1.066,1.2623)	1		-0.0209 (-0.1638,0.1221)	1		0.0031 (6e-04,0.0055)	1
FCRL3	-0.0030477				1.14 (1.0434,1.2445)	1		0.0586 (-0.0791,0.1963)	1		0.0014 (-0.001,0.0037)	1
FCRL5	0.0106264	0.0076381			1.072 (0.9766,1.1775)	1		0.1187 (-0.029,0.2664)	1		0.0065 (0.004,0.009)	0.0014394
FCRL6	-0.0072451	-0.0062272			1.171 (1.0687,1.2823)	1		0.051 (-0.091,0.1931)	1		0.0027 (2e-04,0.0051)	1
FCRLB	0.0049872				1.106 (1.018,1.2023)	1		0.0091 (-0.1307,0.1488)	1		0.0013 (-0.0012,0.0037)	1
FDX1	0.0011481	0.0001928			1.222 (1.1385,1.3114)	7.98e-05		0.2161 (0.0529,0.3793)	1		0.0036 (8e-04,0.0064)	1
FDX2		-0.0024257			1.086 (0.9922,1.1893)	1		-0.0393 (-0.211,0.1324)	1		1e-04 (-0.0029,0.003)	1
FEN1	-0.0007515				0.963 (0.8769,1.0575)	1		0.1476 (0.0062,0.289)	1		0.0018 (-6e-04,0.0043)	1
FES	-0.0093441	-0.0072195			1.034 (0.9482,1.1285)	1		0.024 (-0.1093,0.1573)	1		0.0021 (-3e-04,0.0044)	1
FETUB	-0.0179721	-0.0158302			1.109 (1.0036,1.2244)	1		0.3662 (0.2299,0.5025)	0.0004225		0.0067 (0.0044,0.009)	6.34e-05
FGF12	-0.0024462	-0.0020561			0.9357 (0.8335,1.0505)	1		-0.0799 (-0.2323,0.0724)	1		-0.0027 (-0.0052,-1e-04)	1
FGF19		0.0030051			0.9354 (0.8564,1.0218)	1		-0.1201 (-0.2603,0.0202)	1		-0.0026 (-0.0051,-2e-04)	1
FGF20	0.0047033	0.0167255			1.014 (0.92,1.1167)	1		-0.1757 (-0.3403,-0.0112)	1		-2e-04 (-0.003,0.0026)	1
FGF21	-0.0035555	-0.0096148			1.646 (1.5128,1.7911)	1.66e-27		1.139 (0.9899,1.2883)	0		0.0127 (0.0101,0.0153)	8.31e-18
FGF3	0.0031947	0.0051784			1.063 (0.976,1.1588)	1		-0.0155 (-0.1793,0.1483)	1		-0.0018 (-0.0046,0.001)	1
FGF5	-0.0309734	-0.044731	-5.53165		0.9446 (0.8563,1.042)	1		-0.3025 (-0.4505,-0.1544)	0.184495		-0.0037 (-0.0062,-0.0012)	1
FGF7	0.0067926	0.0049279			1.021 (0.9271,1.1243)	1		0.0203 (-0.1411,0.1817)	1		1e-04 (-0.0026,0.0028)	1
FGF9	0.0089129	0.0142033			0.9614 (0.8717,1.0604)	1		0.1047 (-0.0638,0.2732)	1		0.0021 (-7e-04,0.005)	1
FGFBP2	-0.0078121	-0.0070038			1.025 (0.9306,1.129)	1		0.1425 (-0.0263,0.3112)	1		-5e-04 (-0.0035,0.0024)	1
FGFBP3	-0.0041028				1.042 (0.9422,1.1523)	1		0.1144 (-0.0591,0.2879)	1		0.0022 (-8e-04,0.0051)	1
FGFR4	-0.0089037	-0.0076061			0.9222 (0.8352,1.0183)	1		-0.1937 (-0.3605,-0.027)	1		-6e-04 (-0.0034,0.0023)	1
FGL1		-0.0076294			1.089 (0.9811,1.2098)	1		-0.3358 (-0.5179,-0.1537)	0.888288		-8e-04 (-0.0039,0.0024)	1
FH		0.0038258			1.106 (1.0174,1.2031)	1		0.0805 (-0.0806,0.2415)	1		0.0013 (-0.0015,0.0041)	1
FHIP2A		-0.0026313			1.098 (1.0089,1.1952)	1		0.1181 (-0.0439,0.28)	1		8e-04 (-0.002,0.0036)	1
FHIT		0.0015433			1.054 (0.9605,1.1555)	1		0.1611 (0.0209,0.3013)	1		0.002 (-4e-04,0.0044)	1
FIS1	0.0074178	0.0010322			1.215 (1.1173,1.3205)	0.0149197		0.1928 (0.0509,0.3347)	1		0.0014 (-0.0011,0.0038)	1
FKBP7	0.0040327	0.0073399			1.001 (0.9136,1.0967)	1		0.0817 (-0.0698,0.2332)	1		0.0025 (0,0.0051)	1
FLRT2	-0.0076892	-0.001861			1.229 (1.1293,1.3386)	0.0055839		-0.0199 (-0.1635,0.1237)	1		0.0061 (0.0036,0.0086)	0.0045145
FLT3	0.0177256	0.0198925			1.061 (0.9733,1.1556)	1		-0.1265 (-0.2619,0.0089)	1		-0.0015 (-0.0038,9e-04)	1
FLT3LG	-0.0114134	-0.0054935			1.091 (0.9942,1.1965)	1		0.2562 (0.1097,0.4027)	1		6e-04 (-0.0019,0.0032)	1
FLT4	-0.0085128	-0.0018876			1.145 (1.0423,1.2571)	1		0.2287 (0.0906,0.3669)	1		0.005 (0.0026,0.0074)	0.131987
FMNL1	0.0043265				1.051 (0.9651,1.1435)	1		0.2178 (0.0718,0.3639)	1		0.003 (5e-04,0.0055)	1
FN1	0.0059013				1.207 (1.0982,1.3258)	0.269759		0.6818 (0.5105,0.8531)	2.44e-11		0.0041 (0.0011,0.0071)	1
FNDC1	-0.0030821	-0.0041574			1.076 (0.9754,1.1867)	1		0.4129 (0.2419,0.584)	0.006782		0.0037 (7e-04,0.0066)	1
FOLR1	0.0061894	0.02189			0.9978 (0.9094,1.0947)	1		-0.2622 (-0.4152,-0.1093)	1		4e-04 (-0.0022,0.0031)	1
FOLR2	-0.0179255	-0.0211705			1.207 (1.1015,1.3232)	0.165531		-0.0854 (-0.2332,0.0624)	1		0.0055 (0.003,0.0081)	0.0682871
FOLR3	0.0006554	0.0001707			1.032 (0.9454,1.1261)	1		-0.1235 (-0.2632,0.0163)	1		-0.0014 (-0.0038,0.001)	1
FOS	0.0029812				1.082 (0.9829,1.1914)	1		0.0748 (-0.0963,0.2459)	1		0.0028 (0,0.0057)	1
FOSB	0.0095956	0.0093397			1.057 (0.9735,1.1486)	1		-0.0784 (-0.2281,0.0713)	1		0.0014 (-0.0013,0.0041)	1
FOXO1	-0.0001027				1.105 (1.0104,1.2076)	1		0.0562 (-0.0796,0.192)	1		8e-04 (-0.0016,0.0031)	1
FRZB	0.0143007	0.0065089			1.229 (1.113,1.3569)	0.132863		0.2242 (0.0836,0.3647)	1		0.003 (5e-04,0.0055)	1
FSHB	-0.007521	-0.0134117	-3.52056		1.082 (0.923,1.2692)	1		0.1076 (-0.1435,0.3587)	1		-0.0031 (-0.0074,0.0012)	1
FSTL1	-0.0026269	-0.0195766			1.309 (1.207,1.4191)	2.11e-07		0.0573 (-0.1118,0.2265)	1		0.0061 (0.0032,0.009)	0.115711
FSTL3	-0.006622	-0.0128875			1.518 (1.405,1.6392)	8.07e-23		0.5326 (0.3583,0.7068)	6.56e-06		0.0134 (0.0104,0.0164)	7.32e-15
FUCA1	-0.00017				1.109 (1.0089,1.2183)	1		0.1132 (-0.0283,0.2548)	1		5e-04 (-0.0019,0.003)	1
FUT3_FUT5	0.0023918	0.0083209			1.201 (1.0941,1.3177)	0.33603		0.0617 (-0.092,0.2155)	1		8e-04 (-0.0018,0.0035)	1
FZD10	-0.0013509	-0.0008101			0.9993 (0.9058,1.1025)	1		-0.0395 (-0.2045,0.1254)	1		-0.0021 (-0.0051,8e-04)	1
FZD8	0.0085818	0.0071058			1.043 (0.9508,1.1442)	1		0.0053 (-0.1539,0.1646)	1		0.0014 (-0.0014,0.0041)	1
GABARAPL1		0.0030906			0.9302 (0.8337,1.0377)	1		-0.1069 (-0.268,0.0542)	1		9e-04 (-0.0018,0.0036)	1
GAD1	-0.0102233	-0.0290486			0.943 (0.8537,1.0416)	1		0.0489 (-0.1159,0.2136)	1		0.0014 (-0.0014,0.0042)	1
GAD2		0.0010818			0.9671 (0.8723,1.0722)	1		0.081 (-0.079,0.241)	1		-5e-04 (-0.0032,0.0022)	1
GADD45B	-0.001613	-0.0034649			0.9492 (0.8499,1.06)	1		-0.1893 (-0.3641,-0.0145)	1		-0.0017 (-0.0047,0.0014)	1
GALNT2	0.0123452	0.0161224	0.278795		1.153 (1.057,1.2581)	1		0.1816 (0.0399,0.3232)	1		0.0027 (2e-04,0.0052)	1
GALNT3		-0.004889			1.082 (0.9901,1.1824)	1		0.1153 (-0.0188,0.2494)	1		-6e-04 (-0.0028,0.0017)	1
GALNT5	-0.0200212	-0.0168518			1.023 (0.9278,1.1283)	1		0.1151 (-0.0487,0.2788)	1		-8e-04 (-0.0037,0.0021)	1
GALNT7	0.0015917				1.102 (1.0074,1.2066)	1		0.0246 (-0.1142,0.1634)	1		-0.0042 (-0.0066,-0.0018)	1
GART	0.0235915	0.0351526			1.022 (0.9291,1.1238)	1		0.1861 (0.0291,0.3431)	1		0.0019 (-8e-04,0.0046)	1
GASK1A	0.0006093	0.0008025			1.09 (0.9886,1.2012)	1		0.5653 (0.3936,0.737)	3.72e-07		0.0046 (0.0016,0.0076)	1
GAST	-0.0167096	-0.0196763			1.16 (1.067,1.262)	1		0.274 (0.0874,0.4606)	1		0.0065 (0.0032,0.0097)	0.243899
GATA3	-0.0020833				0.8763 (0.7931,0.9682)	1		0.2017 (0.035,0.3685)	1		0.0022 (-6e-04,0.0051)	1
GBP1	-0.0011694	-0.001582			1.317 (1.2042,1.44)	4.71e-06		0.4583 (0.2812,0.6354)	0.0012141		0.0079 (0.0049,0.0109)	0.0006142
GBP2		0.0036208			1.099 (1.0087,1.1977)	1		0.1192 (-0.0156,0.254)	1		0.0027 (4e-04,0.005)	1
GBP4	-0.0089824	-0.0125041			1.068 (0.9787,1.1664)	1		-0.0058 (-0.1449,0.1332)	1		0.0014 (-0.001,0.0037)	1
GC	0.0058591				0.9569 (0.8679,1.0549)	1		-0.093 (-0.259,0.073)	1		-0.0037 (-0.0065,-8e-04)	1
GCG	-0.0057734	-0.0132133			1.234 (1.1259,1.3532)	0.02098		0.2661 (0.1285,0.4037)	0.442391		0.0024 (0,0.0049)	1
GCHFR	0.0218903	0.01539			1.245 (1.1534,1.3435)	5.43e-05		0.4891 (0.3022,0.6761)	0.0009		0.006 (0.0028,0.0092)	0.841536
GDF15	-0.0414991	-0.0525403	-3.6963		1.572 (1.4582,1.6949)	1.32e-28		0.4779 (0.2719,0.6838)	0.0162522		0.0141 (0.0106,0.0176)	1.15e-11
GDNF		0.0092751			1.128 (1.0308,1.2351)	1		0.2051 (0.0619,0.3484)	1		0.0035 (0.0011,0.0059)	1
GFAP	-0.0321678	-0.0304307	-5.39063		0.8611 (0.7787,0.9523)	1		-0.1939 (-0.3407,-0.047)	1		-0.0015 (-0.004,0.0011)	1
GFRA1	-0.0122929	-0.0478363			1.392 (1.2784,1.515)	6.93e-11		0.5068 (0.3447,0.669)	2.84e-06		0.0114 (0.0086,0.0142)	6.47e-12
GFRA2	0.0114802	0.0043706			1.04 (0.9509,1.1371)	1		-0.0609 (-0.1941,0.0723)	1		0.0026 (2e-04,0.005)	1
GFRAL	0.0015579	0.0057825			1.008 (0.9115,1.1156)	1		-0.175 (-0.3472,-0.0027)	1		-0.0018 (-0.0048,0.0012)	1
GGCT	-0.0032798	-0.0022493			1.023 (0.9276,1.1287)	1		0.228 (0.0564,0.3997)	1		0.0017 (-0.0012,0.0046)	1
GGH	0.000799				1.295 (1.1937,1.4048)	1.43e-06		0.515 (0.364,0.666)	7.61e-08		0.01 (0.0074,0.0127)	2.99e-10
GH1	0.0007902				0.9172 (0.8302,1.0134)	1		-0.6176 (-0.7597,-0.4755)	6.4e-14		-0.006 (-0.0084,-0.0035)	0.0052275
GH2		-0.0004785			0.8465 (0.763,0.9391)	1		-0.0351 (-0.1707,0.1005)	1		0.0025 (1e-04,0.0048)	1
GHR	-0.0277734	-0.0583306			1.51 (1.3521,1.6864)	7.73e-10		1.25 (1.0697,1.4295)	0		0.0099 (0.0068,0.013)	2.04e-06
GHRHR	0.0011651	0.0002205			1.007 (0.9196,1.1035)	1		0.0431 (-0.0959,0.1821)	1		-0.0022 (-0.0046,2e-04)	1
GID8	0.0002154	0.016148			0.9868 (0.8935,1.0898)	1		-0.0062 (-0.1723,0.16)	1		0.002 (-9e-04,0.005)	1
GIGYF2	0.0003305				1.128 (1.0255,1.2413)	1		0.1632 (-3e-04,0.3268)	1		0.0017 (-0.0011,0.0045)	1
GIP	-0.0348632	-0.0299912			1.104 (1.0006,1.2179)	1		-0.0236 (-0.2065,0.1593)	1		0.0017 (-0.0015,0.0049)	1
GIPC2	-0.016119	-0.032088			1.257 (1.1539,1.3692)	0.0004672		0.2954 (0.1196,0.4711)	1		0.0079 (0.0049,0.0109)	0.0008088
GIPC3		-0.0001025			1.087 (0.9843,1.1995)	1		0.0933 (-0.0713,0.2578)	1		4e-04 (-0.0024,0.0032)	1
GIPR	0.0010576	0.0003707			0.9907 (0.8969,1.0942)	1		-0.0033 (-0.1731,0.1665)	1		0 (-0.0029,0.0029)	1
GJA8		-0.0035823			0.9709 (0.8755,1.0766)	1		0.1381 (-0.0298,0.3061)	1		0.0012 (-0.0016,0.0041)	1
GKN1	-0.0072268	-0.005317			1.062 (0.9666,1.1669)	1		0.0531 (-0.0842,0.1903)	1		-4e-04 (-0.0027,0.0019)	1
GLA	0.0129041	0.0035318			1.451 (1.3324,1.5798)	3.15e-14		0.8986 (0.7237,1.0735)	5.31e-20		0.0105 (0.0074,0.0135)	7.26e-08
GLP1R	0.0005653				1.014 (0.9178,1.1192)	1		-0.1215 (-0.2888,0.0457)	1		0.001 (-0.0018,0.0039)	1
GNAS	-0.0004277				1.09 (0.9949,1.1952)	1		0.1344 (-0.0262,0.2951)	1		0.0021 (-7e-04,0.0049)	1
GNE		-0.0092832			1.077 (0.9856,1.1759)	1		0.0255 (-0.1134,0.1643)	1		0.0013 (-0.0012,0.0037)	1
GNGT1	-0.0015363	0.0030849			0.8852 (0.7852,0.9978)	1		-0.057 (-0.215,0.1011)	1		0.0013 (-0.0014,0.004)	1
GNLY	-0.0045077	-0.0017498			1.072 (0.9793,1.1726)	1		0.1296 (-0.0101,0.2694)	1		0.0041 (0.0018,0.0065)	1
GOLGA3	-0.0005188	-0.0043033			0.9947 (0.9023,1.0965)	1		0.0294 (-0.1325,0.1913)	1		8e-04 (-0.002,0.0035)	1
GOT1	-0.0009963	-0.0077366			1.401 (1.3302,1.4759)	1.26e-33		0.5712 (0.3976,0.7448)	3.76e-07		0.0042 (0.0012,0.0072)	1
GP2	-0.0171602	-0.011613			1.031 (0.9412,1.1289)	1		-0.1986 (-0.3431,-0.054)	1		-2e-04 (-0.0027,0.0023)	1
GPA33	-0.0078707	-0.0059001			1.003 (0.9148,1.1003)	1		0.1752 (0.0381,0.3122)	1		0.0015 (-9e-04,0.0039)	1
GPD1	-0.013779	-0.0082848			1.672 (1.5501,1.8039)	0		1.191 (1.0104,1.3709)	6.94e-34		0.0148 (0.0117,0.0179)	6.26e-17
GPHA2	-0.0081703	-0.0203159			0.9866 (0.89,1.0936)	1		-0.1398 (-0.3055,0.0259)	1		4e-04 (-0.0024,0.0032)	1
GPIHBP1		-0.0036472			1.026 (0.9315,1.1311)	1		-0.0588 (-0.2193,0.1017)	1		-0.0012 (-0.004,0.0015)	1
GPR101	0.0029212				1.003 (0.9081,1.1084)	1		-0.0124 (-0.1901,0.1653)	1		0.0032 (2e-04,0.0063)	1
GPR158	-0.0148825	-0.0161492			0.8656 (0.7728,0.9695)	1		-0.2202 (-0.3951,-0.0453)	1		4e-04 (-0.0026,0.0034)	1
GPR15L	-0.0103532	-0.0009536			1.207 (1.0944,1.3301)	0.470442		0.0335 (-0.1396,0.2066)	1		0.0038 (8e-04,0.0068)	1
GPRC5C	-0.0024846	-2.6e-05			1.3 (1.2232,1.3807)	6.81e-14		0.1177 (-0.0571,0.2925)	1		0.0035 (5e-04,0.0064)	1
GRIK2	-0.0078634	-0.005498			1.054 (0.9614,1.1563)	1		0.0186 (-0.1447,0.1819)	1		0.002 (-9e-04,0.0049)	1
GRIN2B	0.0019206	0.004249			0.9268 (0.8276,1.038)	1		-0.1316 (-0.288,0.0247)	1		-1e-04 (-0.0028,0.0025)	1
GRK5	0.000714				1.036 (0.9499,1.1305)	1		0.0273 (-0.1087,0.1632)	1		0.001 (-0.0014,0.0034)	1
GRN	-0.0058072	-0.0153263			1.25 (1.148,1.3606)	0.0007784		0.1169 (-0.0281,0.2619)	1		0.0037 (0.0012,0.0061)	1
GRP	0.0174236	-0.0066797			0.9923 (0.9006,1.0934)	1		-0.0484 (-0.2207,0.1239)	1		-0.0013 (-0.0043,0.0017)	1
GRPEL1	0.0004713	0.0143568			1.594 (1.4974,1.6975)	0		0.348 (0.2044,0.4916)	0.0060836		0.0039 (0.0014,0.0064)	1
GRSF1		-0.0037031			0.9896 (0.8958,1.0931)	1		-0.0339 (-0.2016,0.1338)	1		0.0015 (-0.0014,0.0043)	1
GSAP	-0.0015609	-0.001196			1.006 (0.9188,1.101)	1		-0.1067 (-0.2385,0.0251)	1		-0.0012 (-0.0035,0.0011)	1
GSR	-0.0511183	-0.0775077			1.384 (1.2854,1.4912)	2.62e-14		0.3867 (0.2288,0.5446)	0.0048271		0.0029 (2e-04,0.0056)	1
GSTM4	0.001855	0.0058165			1.019 (0.9267,1.1201)	1		0.0893 (-0.073,0.2516)	1		0.0023 (-5e-04,0.0052)	1
GSTT2B	-0.0007174	-0.0015766			1.024 (0.9287,1.1284)	1		0.1028 (-0.0573,0.2629)	1		0.0012 (-0.0016,0.0039)	1
GTF2IRD1	-0.0003185	-0.0036483			1.123 (1.0373,1.2156)	1		-0.2275 (-0.3928,-0.0622)	1		-0.0012 (-0.0039,0.0016)	1
GUCY2C	0.0025657	0.004662			1.054 (0.9612,1.1561)	1		-0.024 (-0.1955,0.1476)	1		0 (-0.003,0.003)	1
GYS1	0.0006501				0.991 (0.9051,1.0849)	1		0.009 (-0.1288,0.1469)	1		0.0028 (4e-04,0.0051)	1
GZMA	-0.0001262	-0.0115587			1.33 (1.2381,1.4285)	1.59e-11		0.3199 (0.1825,0.4573)	0.0150658		0.0061 (0.0037,0.0086)	0.0022608
GZMB	0.0096578	0.0084135	0.859535		1.019 (0.9292,1.1167)	1		0.3277 (0.187,0.4685)	0.0150132		0.0025 (0,0.0049)	1
GZMH	-0.0041152	-0.0068754			1.134 (1.0463,1.2298)	1		0.1786 (0.0357,0.3215)	1		0.0041 (0.0016,0.0066)	1
HADH		-0.0041501			0.9925 (0.8963,1.0991)	1		0.0693 (-0.0986,0.2372)	1		7e-04 (-0.0022,0.0035)	1
HAO1	-0.0002684				1.819 (1.6697,1.9807)	0		0.7451 (0.599,0.8911)	8.33e-20		0.0065 (0.0039,0.009)	0.0017488
HAVCR1	-0.0177503	-0.0353105	-0.809865		1.588 (1.4648,1.7223)	1.24e-25		0.4607 (0.2896,0.6318)	0.0003997		0.0075 (0.0046,0.0105)	0.0017021
HBZ	0.0011532	0.0025989			1.012 (0.9185,1.1149)	1		0.036 (-0.1275,0.1995)	1		-0.0031 (-0.0059,-3e-04)	1
HDAC8	-0.0002559				1.001 (0.9045,1.1085)	1		-0.0502 (-0.2192,0.1189)	1		7e-04 (-0.0022,0.0035)	1
HDAC9	-0.0029727	-0.0100843			1.011 (0.9169,1.1153)	1		0.0565 (-0.0862,0.1992)	1		-5e-04 (-0.003,0.0021)	1
HDGF		-0.0003278			1.129 (1.0335,1.2343)	1		0.092 (-0.0425,0.2264)	1		0.0019 (-5e-04,0.0042)	1
HEBP1	-0.0018603	-0.0006226			1.043 (0.9574,1.1369)	1		-0.0045 (-0.1444,0.1353)	1		0 (-0.0024,0.0024)	1
HEG1	-0.0337162	-0.0187775			1.398 (1.2678,1.542)	5.68e-08		0.647 (0.4589,0.835)	5.4e-08		0.0046 (0.0014,0.0079)	1
HEPACAM2	-0.0146156	-0.009367			1.055 (0.9578,1.1625)	1		-0.1544 (-0.3187,0.0099)	1		-7e-04 (-0.0035,0.0021)	1
HEPH	-0.0042563	-0.0173809			1.198 (1.0792,1.3293)	1		0.4965 (0.3218,0.6713)	8.06e-05		0.0059 (0.0029,0.0088)	0.293369
HGFAC		0.0040544			1.094 (0.9883,1.2114)	1		0.1676 (0.0082,0.3271)	1		-0.0021 (-0.0048,5e-04)	1
HIF1A	-0.0031634	-0.0048455			1.068 (0.9786,1.1656)	1		-0.0082 (-0.1714,0.1549)	1		4e-04 (-0.0023,0.0032)	1
HIP1R		0.0001002			1.286 (1.21,1.3662)	1.38e-12		0.5469 (0.3594,0.7343)	3.45e-05		0.011 (0.0079,0.0142)	3.27e-08
HJV	0.0012338				1.225 (1.1395,1.3167)	0.0001107		0.5404 (0.3728,0.708)	8.74e-07		0.008 (0.0052,0.0109)	0.0001154
HLA_A	-0.008319				1.046 (0.9492,1.1529)	1		-0.1413 (-0.3062,0.0235)	1		0 (-0.0028,0.0029)	1
HLA_DRA	-0.0095134	-0.0140525			1.185 (1.0866,1.293)	0.37051		-0.0234 (-0.1593,0.1125)	1		0.0019 (-5e-04,0.0042)	1
HLA_E	-0.0027031				1.121 (1.0283,1.2224)	1		-0.0047 (-0.1524,0.1431)	1		0.0057 (0.0032,0.0083)	0.0306518
HMCN2	0.0010166	0.0025784			0.9883 (0.8967,1.0892)	1		-0.0498 (-0.221,0.1214)	1		5e-04 (-0.0025,0.0034)	1
HMGCS1	-0.0048645	-0.0072851			0.9815 (0.8878,1.0851)	1		0.1239 (-0.0337,0.2816)	1		1e-04 (-0.0025,0.0028)	1
HMOX1	0.0142967	0.0112775	1.10406		1.359 (1.2497,1.4772)	1.96e-09		0.2679 (0.1223,0.4135)	0.918385		7e-04 (-0.0018,0.0033)	1
HMOX2	0.0014294	0.0067963			1.28 (1.199,1.3673)	4.72e-10		0.0826 (-0.0584,0.2236)	1		9e-04 (-0.0015,0.0033)	1
HPGDS	0.0139959	0.0175004			0.9011 (0.8209,0.9892)	1		0.0585 (-0.072,0.189)	1		-0.0028 (-0.005,-5e-04)	1
HRAS	0.001979	0.0040358			1.047 (0.9576,1.1455)	1		0.036 (-0.137,0.2091)	1		0.0026 (-3e-04,0.0055)	1
HRC	0.0026061				1.015 (0.9211,1.1184)	1		-0.2048 (-0.3772,-0.0325)	1		-0.0028 (-0.0058,2e-04)	1
HRG		0.0009951			1.182 (1.0716,1.3033)	1		0.4018 (0.2396,0.564)	0.0036788		0.003 (3e-04,0.0058)	1
HS3ST3B1	0.0185388	0.0136996			1.086 (0.9931,1.1876)	1		0.1044 (-0.0318,0.2406)	1		-1e-04 (-0.0025,0.0022)	1
HS6ST2	-0.0173526	-0.006886			0.9796 (0.8855,1.0837)	1		0.1211 (-0.0698,0.3121)	1		-3e-04 (-0.0036,0.0029)	1
HSBP1	-0.0041871	-0.0016564			1.073 (0.9722,1.1835)	1		0.015 (-0.148,0.178)	1		-3e-04 (-0.0031,0.0025)	1
HSD11B1	0.020224	0.0243676			0.962 (0.8776,1.0545)	1		-0.5094 (-0.664,-0.3547)	3.46e-07		-0.0068 (-0.0095,-0.0042)	0.0014625
HSD17B3		0.009296			1.075 (0.9827,1.1768)	1		0.0848 (-0.0848,0.2544)	1		-4e-04 (-0.0033,0.0025)	1
HSDL2		-0.0092777			1.198 (1.0933,1.3133)	0.320836		0.2208 (0.0514,0.3903)	1		0.0048 (0.0019,0.0077)	1
HSP90B1	-0.0018092	-0.0020956			0.9783 (0.8883,1.0774)	1		0.0234 (-0.1067,0.1536)	1		5e-04 (-0.0017,0.0028)	1
HSPA2	0.0023383				1.071 (0.9766,1.1748)	1		0.0671 (-0.1144,0.2485)	1		-3e-04 (-0.0034,0.0028)	1
HSPB1	-0.0090227	-0.0103543			1.115 (1.0137,1.2264)	1		0.108 (-0.0275,0.2435)	1		0.0026 (3e-04,0.0049)	1
HYAL1		0.0037224			1.173 (1.0784,1.2761)	0.589075		-0.0048 (-0.15,0.1403)	1		8e-04 (-0.0017,0.0033)	1
HYOU1	0.002165	0.0231045			1.024 (0.9387,1.116)	1		-0.079 (-0.2274,0.0693)	1		-1e-04 (-0.0027,0.0024)	1
ICAM1	-0.0133172	-0.0333129			1.465 (1.36,1.5777)	2.04e-20		0.4861 (0.3386,0.6335)	3.32e-07		0.0112 (0.0087,0.0137)	2.83e-14
ICAM2	-0.0011764	-0.0017258			1.061 (0.9698,1.1598)	1		-0.0616 (-0.2002,0.0769)	1		9e-04 (-0.0014,0.0033)	1
ICAM4	-0.0080604	-0.0091959			0.9665 (0.8827,1.0582)	1		-0.1585 (-0.2995,-0.0175)	1		-0.0016 (-0.004,8e-04)	1
ICAM5	0.0110588	0.0259271			0.9796 (0.8932,1.0744)	1		-0.0755 (-0.2229,0.0719)	1		-0.0035 (-0.006,-0.001)	1
IDI2	-0.0008092	-0.0025302			1.13 (1.0386,1.2297)	1		0.1541 (0.0127,0.2955)	1		0.0041 (0.0017,0.0065)	1
IDO1	-0.0030279				1.144 (1.0428,1.2559)	1		0.29 (0.112,0.468)	1		0.0051 (0.002,0.0082)	1
IDS	-0.0746658	-0.0752055			0.8997 (0.8272,0.9785)	1		-0.0774 (-0.2097,0.055)	1		-7e-04 (-0.003,0.0016)	1
IDUA	-0.0059763	-0.0054167			1.46 (1.3258,1.6087)	4.85e-11		0.5942 (0.462,0.7264)	5.27e-15		0.007 (0.0047,0.0094)	9.72e-06
IFI30	-0.0009332				1.447 (1.3298,1.5741)	2.69e-14		0.7764 (0.5844,0.9685)	9.44e-12		0.015 (0.0118,0.0182)	4.82e-16
IFIT3		0.011479			1.08 (0.9885,1.1789)	1		-0.1007 (-0.2737,0.0724)	1		6e-04 (-0.0023,0.0035)	1
IFNAR1	0.0022648	0.0147136			1.037 (0.9444,1.1386)	1		0.2402 (0.0749,0.4055)	1		6e-04 (-0.0022,0.0034)	1
IFNGR1	0.0288223	0.0200426			1.162 (1.0778,1.2522)	0.260029		-0.08 (-0.2263,0.0662)	1		0.001 (-0.0015,0.0035)	1
IFNGR2	-0.0015361				1.356 (1.2479,1.4725)	1.67e-09		0.4782 (0.3379,0.6185)	7.78e-08		0.0071 (0.0047,0.0095)	2.73e-05
IFNL1	0.0034957	0.0091017			1.175 (1.0838,1.273)	0.259532		0.1122 (-0.027,0.2514)	1		0.0048 (0.0024,0.0073)	0.322881
IFNLR1	0.0223464	0.0354069			1.24 (1.1597,1.3251)	7.75e-07		0.382 (0.2539,0.5102)	1.6e-05		0.0072 (0.0049,0.0094)	8.9e-07
IFNW1		-0.0022816			0.9427 (0.8472,1.0489)	1		-0.0365 (-0.2017,0.1287)	1		-2e-04 (-0.003,0.0026)	1
IGDCC4	0.0480722	0.0748598	4.86557		0.8863 (0.8026,0.9786)	1		-0.1727 (-0.3606,0.0151)	1		-0.0059 (-0.0091,-0.0027)	0.974487
IGF2BP3	0.0025839				0.9907 (0.8941,1.0976)	1		0.0648 (-0.0964,0.226)	1		0.0014 (-0.0014,0.0041)	1
IGF2R	0.0065831	0.0169967			1.44 (1.3174,1.5729)	2.28e-12		0.5897 (0.4437,0.7358)	9.12e-12		0.0077 (0.0052,0.0102)	7.5e-06
IGFBP1		0.0061364			0.7461 (0.6763,0.8231)	1.48e-05		-1.065 (-1.2162,-0.9139)	0		-0.0107 (-0.0133,-0.008)	4.38e-12
IGFBP3	0.0001151	0.0037104			0.9073 (0.8357,0.9851)	1		0.3019 (0.1448,0.4591)	0.490896		0.0013 (-0.0015,0.004)	1
IGFBP6	0.0238332	0.0628398			1.05 (0.9532,1.1561)	1		0.039 (-0.1447,0.2227)	1		0.0058 (0.0026,0.009)	1
IGFBP7	-0.020875	-0.0169381			1.366 (1.3011,1.4339)	8.69e-33		0.4731 (0.3141,0.6321)	1.71e-05		0.0115 (0.0087,0.0142)	5.7e-13
IGFBPL1	0.0003256	0.0041533			1.586 (1.4691,1.712)	9.31e-29		0.571 (0.4103,0.7317)	1.1e-08		0.0089 (0.0062,0.0117)	5.95e-07
IGFL4		0.0022194			1.045 (0.9586,1.1403)	1		0.0748 (-0.1013,0.251)	1		-2e-04 (-0.0032,0.0028)	1
IGHMBP2	0.0043223				1.066 (0.9705,1.1708)	1		-0.0128 (-0.175,0.1495)	1		0.001 (-0.0018,0.0037)	1
IGLC2	-0.0056681				1.107 (1.0315,1.1875)	1		0.148 (-0.0396,0.3357)	1		0.0063 (0.0029,0.0097)	0.871633
IGSF21	-0.0113965	-0.007764			1.094 (1.0035,1.193)	1		0.1196 (-0.0467,0.2859)	1		4e-04 (-0.0024,0.0033)	1
IGSF3	-0.0184672	-0.0371542			1.529 (1.4541,1.6085)	0		1.235 (1.0836,1.3865)	0		0.0161 (0.0135,0.0188)	2.25e-28
IGSF9	0.0026042				1.964 (1.7901,2.1556)	0		1.967 (1.7783,2.1561)	0		0.0225 (0.0191,0.0258)	1.38e-34
IL10		0.000384			1.133 (1.0464,1.2267)	1		0.0714 (-0.0644,0.2071)	1		0.0037 (0.0013,0.0061)	1
IL12A_IL12B	-0.0038824	-0.0002953			1.271 (1.1655,1.3859)	0.0001678		0.2269 (0.074,0.3797)	1		0.0059 (0.0033,0.0085)	0.034129
IL12B	-0.0015491	-0.0097567			1.294 (1.1825,1.4169)	6.56e-05		0.1821 (0.0323,0.332)	1		0.0054 (0.0028,0.0079)	0.121409
IL12RB1	-0.0069774	-0.0170608			1.171 (1.0762,1.275)	0.742188		0.0185 (-0.1186,0.1557)	1		0.0033 (9e-04,0.0057)	1
IL13		-0.0008855			1.091 (1.0139,1.1742)	1		-0.0232 (-0.1543,0.1078)	1		-8e-04 (-0.0031,0.0015)	1
IL13RA1	-0.0028847	-0.0073295			1.331 (1.2177,1.4546)	8.49e-07		0.6717 (0.532,0.8113)	1.97e-17		0.0084 (0.006,0.0108)	2.19e-08
IL13RA2	-0.0131964	-0.0119635			0.9779 (0.8857,1.0796)	1		-0.043 (-0.2069,0.1208)	1		7e-04 (-0.0022,0.0036)	1
IL15	-0.0143614	-0.0203031			1.14 (1.047,1.2412)	1		0.0635 (-0.0796,0.2065)	1		2e-04 (-0.0022,0.0027)	1
IL15RA	-0.0067726	-0.0201921			1.123 (1.0246,1.2309)	1		-0.0342 (-0.1757,0.1073)	1		0.0012 (-0.0012,0.0037)	1
IL17A	0.006619	0.0036475			1.031 (0.946,1.1246)	1		0.0149 (-0.1281,0.1579)	1		0.0013 (-0.0012,0.0037)	1
IL17D	-0.0133945	-0.0220302			1.03 (0.9408,1.1287)	1		-0.1151 (-0.2566,0.0265)	1		-0.0022 (-0.0046,3e-04)	1
IL17F	0.0020512				1.096 (1.0111,1.1882)	1		7e-04 (-0.1336,0.1351)	1		8e-04 (-0.0015,0.0031)	1
IL17RB	0.0009964	0.0039731			0.8225 (0.7484,0.904)	0.148058		-0.7172 (-0.8656,-0.5688)	1.3e-17		-0.0082 (-0.0108,-0.0056)	1.08e-06
IL18BP		0.0131672			1.38 (1.274,1.494)	7.05e-12		0.1613 (0.0047,0.3179)	1		0.0081 (0.0054,0.0109)	1.53e-05
IL18R1	-0.0228287	-0.0283272			1.585 (1.4523,1.7293)	1.4e-21		0.851 (0.701,1.001)	7.1e-25		0.0127 (0.0101,0.0153)	3.43e-18
IL18RAP	0.0008703				0.9694 (0.8838,1.0633)	1		-0.0244 (-0.1617,0.113)	1		-3e-04 (-0.0027,0.002)	1
IL1A	-0.0036182	-0.004351			0.9772 (0.8914,1.0712)	1		0.1084 (-0.036,0.2528)	1		3e-04 (-0.0021,0.0028)	1
IL1R1	0.013897	0.0204915			1.131 (1.0373,1.2334)	1		-0.3508 (-0.4983,-0.2033)	0.0094527		-0.0014 (-0.0039,0.0011)	1
IL1RL1	0.0273597	0.0128533	2.69533		1.247 (1.1272,1.3785)	0.0518071		0.2074 (0.0589,0.356)	1		0.0028 (3e-04,0.0054)	1
IL1RL2	0.0020078				1.121 (1.0167,1.2357)	1		0.0693 (-0.0755,0.2142)	1		-0.0035 (-0.006,-9e-04)	1
IL20	-0.0007157	-0.0025105			0.9378 (0.8474,1.0377)	1		-0.0403 (-0.1791,0.0984)	1		2e-04 (-0.0022,0.0026)	1
IL20RB	-0.0033229	-0.0017024			1.009 (0.9137,1.1134)	1		-0.1373 (-0.3055,0.031)	1		2e-04 (-0.0027,0.0031)	1
IL22	0.001819	0.0119911			1.033 (0.9361,1.14)	1		0.1243 (-0.0402,0.2888)	1		0.0056 (0.0027,0.0085)	0.495863
IL22RA1	-0.0101024	-0.0077339			1.036 (0.95,1.1303)	1		0.108 (-0.0354,0.2515)	1		0 (-0.0023,0.0024)	1
IL24	-0.0019616	-0.001857			1.022 (0.9364,1.1161)	1		-0.0352 (-0.1647,0.0944)	1		0.0024 (2e-04,0.0047)	1
IL2RA	-0.008907	-0.012853			1.233 (1.1319,1.3425)	0.0045145		0.131 (-0.0147,0.2766)	1		0.0092 (0.0067,0.0117)	3.15e-09
IL2RB	0.0102645	0.0182354			0.9843 (0.8991,1.0777)	1		-0.0365 (-0.1763,0.1033)	1		-6e-04 (-0.0029,0.0017)	1
IL2RG	0.0058885	0.0071809			1.002 (0.914,1.0988)	1		0.056 (-0.1074,0.2193)	1		0.0043 (0.0015,0.0071)	1
IL31		-0.0011068			0.9798 (0.8838,1.0863)	1		0.0275 (-0.1372,0.1922)	1		-0.0016 (-0.0044,0.0011)	1
IL31RA	0.0050635	0.0015403			1.002 (0.9061,1.1076)	1		0.1771 (0.0083,0.3458)	1		7e-04 (-0.0022,0.0036)	1
IL32	0.0137648	0.0121374			1.355 (1.2629,1.454)	8.14e-14		-0.0898 (-0.2399,0.0604)	1		-9e-04 (-0.0035,0.0017)	1
IL33		-0.0053452			1.072 (0.9796,1.1736)	1		-0.0373 (-0.1682,0.0935)	1		-7e-04 (-0.003,0.0015)	1
IL36A	-0.0002577				1.025 (0.9327,1.1266)	1		0.1114 (-0.062,0.2848)	1		1e-04 (-0.0029,0.0031)	1
IL36G		-0.0015197			0.9891 (0.8949,1.0932)	1		0.1185 (-0.0463,0.2833)	1		0.0012 (-0.0018,0.0041)	1
IL3RA	0.0178355	0.0357823			0.9884 (0.8999,1.0855)	1		-0.0081 (-0.1493,0.133)	1		3e-04 (-0.0021,0.0027)	1
IL4	-0.0008075	-0.0037595			0.9914 (0.9081,1.0823)	1		0.0666 (-0.0669,0.2)	1		7e-04 (-0.0015,0.003)	1
IL4R	0.0253485	0.0374423			1.267 (1.1661,1.3765)	6.55e-05		-0.1846 (-0.3334,-0.0357)	1		2e-04 (-0.0024,0.0027)	1
IL5	0.001181				1.07 (0.9816,1.166)	1		-0.0633 (-0.2031,0.0765)	1		5e-04 (-0.0019,0.0028)	1
IL5RA	-0.0130967	-0.0121687			1.129 (1.0343,1.2317)	1		-0.0474 (-0.1932,0.0984)	1		0.0027 (2e-04,0.0052)	1
IL6	-0.0018549	-0.00274			1.269 (1.1828,1.3609)	8.34e-08		0.4529 (0.2949,0.6108)	5.91e-05		0.0106 (0.0079,0.0133)	5.09e-11
IL7	0.0060435	0.0118522			1.107 (1.0133,1.209)	1		0.1968 (0.0582,0.3354)	1		0.0019 (-5e-04,0.0043)	1
IL7R	0.00794	0.0060438			0.9345 (0.8518,1.0253)	1		-0.1487 (-0.2923,-0.0051)	1		-0.0029 (-0.0053,-4e-04)	1
IL9	0.0037869	0.0005771			1.023 (0.9298,1.1248)	1		-0.0201 (-0.1759,0.1357)	1		0.0037 (9e-04,0.0064)	1
IMPA1		-0.0035939			1.055 (0.9651,1.1529)	1		0.0051 (-0.133,0.1433)	1		8e-04 (-0.0016,0.0031)	1
INHBB	-0.0184594				1.201 (1.0926,1.3212)	0.442975		0.1406 (-0.0472,0.3283)	1		0.0093 (0.0061,0.0125)	3.79e-05
INHBC	-0.0167766	-0.0221101			1.613 (1.4455,1.7999)	3.71e-14		0.9343 (0.786,1.0827)	6.14e-31		0.0138 (0.0112,0.0163)	1.04e-22
INPP5J	0.0003126				0.9916 (0.8963,1.097)	1		0.0946 (-0.0736,0.2628)	1		-1e-04 (-0.003,0.0028)	1
INPPL1	0.0057856	0.000738			1.067 (0.9762,1.1666)	1		0.098 (-0.0358,0.2318)	1		0.0022 (-1e-04,0.0045)	1
INSL3			3.20904		0.8579 (0.7157,1.0283)	1		0.0772 (-0.246,0.4005)	1		-9e-04 (-0.0064,0.0047)	1
INSL5	-0.0060471	-0.0037775			1.297 (1.1822,1.4236)	0.0001157		0.462 (0.2871,0.637)	0.0006966		0.0067 (0.0037,0.0097)	0.0461092
INSR		0.0105676			1.172 (1.0688,1.2862)	1		0.1113 (-0.0635,0.2861)	1		0.0024 (-6e-04,0.0054)	1
ISLR2	-0.0179155	-0.0095411			0.8833 (0.8045,0.9697)	1		-0.0144 (-0.1562,0.1273)	1		2e-04 (-0.0022,0.0026)	1
ISM1	-0.029304	-0.0363901			1.238 (1.1337,1.3515)	0.0057067		0.4992 (0.3556,0.6427)	3.1e-08		0.0078 (0.0053,0.0102)	2.55e-06
ISM2	0.0030235				0.9868 (0.8934,1.0901)	1		0.1302 (-0.0259,0.2864)	1		4e-04 (-0.0024,0.0032)	1
ITGAM		-0.0189548			1.041 (0.9497,1.1413)	1		0.0223 (-0.1203,0.1649)	1		-8e-04 (-0.0032,0.0016)	1
ITGB1	-0.002205				1.12 (1.0265,1.2226)	1		4e-04 (-0.1428,0.1436)	1		0.0016 (-9e-04,0.004)	1
ITGB1BP1	0.0056154	0.0116589			1.059 (0.9687,1.1583)	1		-0.0949 (-0.2288,0.039)	1		-5e-04 (-0.0028,0.0018)	1
ITGB2	-0.0653919	-0.024061			1.185 (1.0839,1.2958)	0.561608		0.1177 (-0.0326,0.2681)	1		0.0023 (-3e-04,0.0049)	1
ITGB5	-0.0203935	-0.0274819			1.04 (0.9533,1.1349)	1		0.0784 (-0.0609,0.2177)	1		0.001 (-0.0014,0.0034)	1
ITGB6	0.0264272	0.0174611	4.87993		0.9803 (0.8902,1.0795)	1		-0.1344 (-0.2873,0.0185)	1		-0.0028 (-0.0055,-2e-04)	1
ITGB7	0.0104854	0.0159363			1.183 (1.0868,1.2879)	0.303304		-0.0199 (-0.1577,0.1179)	1		0.0031 (7e-04,0.0054)	1
ITGBL1	-0.0240541	-0.0159411			1.567 (1.477,1.6631)	0		0.7591 (0.5635,0.9548)	1.09e-10		0.012 (0.0086,0.0154)	1.71e-08
ITIH1	0.0052983				0.9847 (0.8926,1.0862)	1		0.1821 (0.0274,0.3368)	1		6e-04 (-0.002,0.0032)	1
ITIH3	0.0094006	0.0060715	-3.86997		0.9454 (0.8599,1.0395)	1		-0.6548 (-0.8067,-0.503)	1.11e-13		-0.0011 (-0.0038,0.0016)	1
ITIH4	-0.0067121				0.9568 (0.8609,1.0635)	1		0.1039 (-0.0778,0.2855)	1		0.0012 (-0.002,0.0043)	1
ITPA		0.0022727			1.008 (0.9132,1.1137)	1		0.2525 (0.085,0.4199)	1		7e-04 (-0.0021,0.0036)	1
ITPR1	0.0012807				1.117 (1.0238,1.2185)	1		0.1338 (-0.029,0.2965)	1		0.0029 (1e-04,0.0056)	1
IZUMO1		0.0016577			0.9511 (0.8547,1.0582)	1		-0.0756 (-0.2561,0.105)	1		-0.0029 (-0.006,1e-04)	1
JAM2	0.0030037	0.0137567			1.111 (1.0203,1.2104)	1		-0.0255 (-0.1832,0.1321)	1		0.0033 (6e-04,0.006)	1
JCHAIN	-0.0120874	-0.0151166			1.121 (1.0241,1.2266)	1		-0.1238 (-0.2615,0.0138)	1		0.0013 (-0.0011,0.0036)	1
JMJD1C		-0.0035558			1.018 (0.9235,1.1221)	1		0.0085 (-0.1543,0.1714)	1		0.0036 (8e-04,0.0064)	1
KAZALD1		0.00031			1.198 (1.0868,1.3197)	0.794784		-0.0722 (-0.2126,0.0682)	1		-0.001 (-0.0034,0.0015)	1
KAZN	-0.0001388				1.042 (0.9459,1.1488)	1		0.1254 (-0.0383,0.2892)	1		0.0012 (-0.0016,0.004)	1
KCNH2		-0.0003781			0.9925 (0.8994,1.0952)	1		-0.0026 (-0.1701,0.1649)	1		-9e-04 (-0.0037,0.002)	1
KDR	0.0051945				1.038 (0.9461,1.1388)	1		0.3631 (0.2237,0.5025)	0.0009982		0.0022 (-2e-04,0.0046)	1
KEL	0.011774	0.0108312	1.77997		1.108 (1.0076,1.2179)	1		0.2118 (0.0712,0.3525)	1		0.0019 (-5e-04,0.0043)	1
KHK	-0.009943	-0.0021422			1.839 (1.6609,2.0371)	3.67e-28		1.019 (0.8485,1.1887)	1.2e-27		0.0095 (0.0065,0.0125)	1.71e-06
KIAA1549	0.0010017	0.0076927			0.9979 (0.9059,1.0991)	1		-0.0482 (-0.2202,0.1239)	1		0 (-0.003,0.0029)	1
KIAA1549L		0.0027339			1.023 (0.9276,1.1278)	1		-0.0829 (-0.2556,0.0897)	1		-0.0012 (-0.0042,0.0018)	1
KIAA2013		6.8e-05			0.967 (0.8707,1.0741)	1		-0.0739 (-0.2409,0.0932)	1		-0.001 (-0.0039,0.0019)	1
KIF1C	0.0020509	0.0010615			1.185 (1.1113,1.2635)	0.0006393		0.1233 (-0.0431,0.2898)	1		0.0045 (0.0017,0.0073)	1
KIF20B	-0.0014333				1.094 (0.9997,1.1968)	1		0.0836 (-0.0647,0.2318)	1		4e-04 (-0.0022,0.003)	1
KIF22	-0.0005827				1.055 (0.955,1.1662)	1		0.0997 (-0.0699,0.2694)	1		-3e-04 (-0.0032,0.0026)	1
KIR2DL3	-0.0019754	-0.0008636			1.104 (1.0102,1.2065)	1		0.1154 (-0.0292,0.2601)	1		0.0026 (0,0.0051)	1
KIR2DS4	-0.0001337	-0.0005572			1.093 (0.993,1.2028)	1		-0.1097 (-0.2692,0.0499)	1		-0.0014 (-0.0041,0.0013)	1
KIR3DL1	-3.36e-06	-0.0003018			1.042 (0.9528,1.1397)	1		-0.0026 (-0.1389,0.1338)	1		-5e-04 (-0.0029,0.0019)	1
KIR3DL2	0.005801	0.0073926			1.006 (0.9129,1.1088)	1		-0.0311 (-0.1985,0.1363)	1		8e-04 (-0.0021,0.0037)	1
KIRREL1		0.000378			1.077 (0.9839,1.1778)	1		-0.0313 (-0.1913,0.1287)	1		0.0018 (-0.0011,0.0046)	1
KIT	0.0331811	0.0378247			0.8306 (0.7575,0.9108)	0.231159		-0.4259 (-0.5731,-0.2787)	4.4e-05		-0.0049 (-0.0075,-0.0024)	0.472487
KITLG		-0.0043973			0.729 (0.6716,0.7913)	1.25e-10		-0.5861 (-0.7322,-0.44)	1.37e-11		-0.0077 (-0.0103,-0.0051)	1.1e-05
KLF4		0.0006876			1.074 (0.9763,1.1804)	1		0.2022 (0.0321,0.3723)	1		0.0043 (0.0014,0.0073)	1
KLHL41	0.0049341				1.036 (0.9414,1.14)	1		-0.0546 (-0.2162,0.1071)	1		2e-04 (-0.0026,0.0029)	1
KLK1	-0.0033302	-0.0039635			1.075 (0.9853,1.1734)	1		-0.0702 (-0.2092,0.0687)	1		0.0025 (1e-04,0.0049)	1
KLK10	0.0148694	0.0185822			1.097 (1.0066,1.1959)	1		0.1035 (-0.0351,0.2422)	1		0.0044 (0.0021,0.0068)	0.72524
KLK11	0.0281121	0.0373747			1.097 (1.0103,1.1919)	1		-0.1131 (-0.2603,0.0341)	1		0.0025 (-1e-04,0.0051)	1
KLK12	-0.0008432				1.003 (0.9164,1.0971)	1		-0.016 (-0.152,0.1199)	1		0.0026 (2e-04,0.0049)	1
KLK14	-0.0325842	-0.0437062	-2.11915		0.8883 (0.81,0.9743)	1		-0.3959 (-0.5366,-0.2553)	0.0001064		-9e-04 (-0.0033,0.0016)	1
KLK4	-0.0279141	-0.0392449	-2.68011		1.002 (0.9125,1.0992)	1		-0.2524 (-0.4075,-0.0974)	1		-4e-04 (-0.0031,0.0023)	1
KLK6	0.0179023	0.007913			1.032 (0.9449,1.1281)	1		-0.0872 (-0.2334,0.059)	1		-0.0019 (-0.0044,6e-04)	1
KLK7	-0.0026225	-0.0163889			0.9744 (0.8801,1.0787)	1		0.0646 (-0.1163,0.2456)	1		-0.0014 (-0.0045,0.0017)	1
KLKB1	0.0166383	0.0169481			0.9586 (0.8659,1.0614)	1		0.3886 (0.2087,0.5684)	0.0684332		2e-04 (-0.0029,0.0033)	1
KLRB1	0.006348	0.0138731			1.3 (1.1926,1.4179)	7.88e-06		0.1755 (0.0257,0.3254)	1		0.0068 (0.0042,0.0094)	0.000644
KLRC1	0.0033141	0.0054624			0.9881 (0.89,1.097)	1		-0.1121 (-0.2747,0.0505)	1		-1e-04 (-0.003,0.0028)	1
KLRD1	-0.011032	-0.0130766			1.239 (1.131,1.3567)	0.0116559		0.353 (0.2055,0.5006)	0.0081641		0.0071 (0.0046,0.0096)	0.0001185
KLRF1	0.0023086				1.082 (0.9938,1.1773)	1		0.3111 (0.1291,0.4932)	1		0.0034 (4e-04,0.0065)	1
KLRK1		-0.001829			1.137 (1.0316,1.2534)	1		0.116 (-0.0408,0.2729)	1		0.0054 (0.0026,0.0082)	0.420768
KRT14	0.0053847	0.0163636			0.986 (0.8991,1.0813)	1		-0.0671 (-0.2072,0.073)	1		-4e-04 (-0.0027,0.002)	1
KRT18	3.97e-05				1.895 (1.7688,2.0306)	0		1.517 (1.3641,1.6694)	0		0.0202 (0.0175,0.0229)	0
KRT19	0.001123	0.0011354			1.118 (1.0225,1.2219)	1		-0.0943 (-0.2393,0.0508)	1		0.0016 (-9e-04,0.0041)	1
KRT5	0.0050838	0.0082359	1.31595		1.095 (1,1.1999)	1		0.0822 (-0.061,0.2253)	1		-1e-04 (-0.0026,0.0024)	1
KRT6C	0.0053427				0.9049 (0.8082,1.0131)	1		-0.0637 (-0.2302,0.1028)	1		-0.0022 (-0.0052,8e-04)	1
KRT8	0.0027322				1.363 (1.3039,1.4252)	0		0.7374 (0.5305,0.9443)	1.01e-08		0.013 (0.0094,0.0165)	3.99e-09
KYNU	-0.0163849	-0.0075989			1.757 (1.6268,1.8978)	0		1.17 (1.0197,1.3193)	0		0.0129 (0.0103,0.0155)	2.28e-18
L1CAM	-0.0403518	-0.025813			1.027 (0.9374,1.1246)	1		-0.0763 (-0.2207,0.068)	1		-0.0035 (-0.006,-0.001)	1
LAIR1	-0.0213152	-0.0133708			1.267 (1.1797,1.3606)	2.34e-07		0.2692 (0.0972,0.4412)	1		0.0134 (0.0105,0.0163)	2.05e-15
LAIR2	-0.0046219	-0.005374			1.138 (1.0355,1.2517)	1		0.0128 (-0.1294,0.155)	1		0.0016 (-8e-04,0.0041)	1
LAMA1		0.0052363			0.9646 (0.8681,1.0718)	1		-0.044 (-0.2229,0.135)	1		-0.0021 (-0.0052,0.001)	1
LAMA4	-0.0568836	-0.0814154			1.152 (1.0599,1.252)	1		0.0718 (-0.073,0.2165)	1		0.0032 (7e-04,0.0057)	1
LAMB1		-0.0133037			1.358 (1.2298,1.4993)	4.17e-06		0.4628 (0.2909,0.6348)	0.0004102		0.0069 (0.0039,0.0099)	0.0156561
LAMP1	-0.0005438				1.122 (1.067,1.1792)	0.0192823		0.4006 (0.2171,0.5841)	0.0562485		0.0029 (-4e-04,0.0062)	1
LAMP2	-0.0336638	-0.0330138			1.624 (1.4787,1.7846)	1.4e-20		0.811 (0.664,0.9581)	2.04e-23		0.0081 (0.0056,0.0106)	1.07e-06
LAMP3	0.0439466	0.0241031			1.118 (1.0139,1.2329)	1		0.166 (-0.0053,0.3373)	1		0.0085 (0.0055,0.0114)	5.08e-05
LAMTOR5		0.0153659			1.035 (0.9424,1.1367)	1		0.1037 (-0.0674,0.2748)	1		8e-04 (-0.0023,0.0038)	1
LAT	0.0060982	0.0089032			1.106 (1.0082,1.2131)	1		0.1758 (0.0389,0.3128)	1		0.0032 (8e-04,0.0055)	1
LATS1	0.0008404				1.142 (1.0365,1.259)	1		0.2067 (0.0358,0.3776)	1		0.0021 (-8e-04,0.005)	1
LAYN	-0.0183004	-0.0326479			1.132 (1.0372,1.2358)	1		-0.2278 (-0.3925,-0.0631)	1		0.0019 (-0.001,0.0048)	1
LBP	0.0016639				1.196 (1.0932,1.309)	0.281622		0.1456 (0.0062,0.2849)	1		0.0063 (0.0039,0.0087)	0.0004813
LCAT	-0.0348314	-0.017497			1.237 (1.115,1.3724)	0.174852		0.5929 (0.4368,0.7489)	3.59e-10		0.0033 (7e-04,0.006)	1
LCN15	-0.0045097	-0.0037944			1.045 (0.9536,1.1461)	1		0.2007 (0.0279,0.3736)	1		0.0023 (-6e-04,0.0053)	1
LCN2	0.0166168				1.117 (1.0228,1.2189)	1		0.0184 (-0.1388,0.1756)	1		0.0095 (0.0068,0.0122)	3.15e-08
LCP1	0.0023901				1.082 (0.9856,1.1884)	1		0.2958 (0.1334,0.4582)	1		0.0022 (-6e-04,0.005)	1
LDLR	0.0076092				1.327 (1.2095,1.4555)	6.21e-06		0.7592 (0.6109,0.9076)	5.87e-20		0.0056 (0.003,0.0082)	0.0662125
LECT2	-0.0221929	-0.0236531	-0.173105		1.215 (1.0958,1.3473)	0.639041		0.5768 (0.3831,0.7705)	1.71e-05		0.0063 (0.0029,0.0096)	0.689592
LEFTY2	-0.0173434	-0.0214354	-2.79802		1.123 (1.0222,1.2334)	1		0.0972 (-0.0502,0.2447)	1		-0.0011 (-0.0036,0.0015)	1
LEG1		0.0035864			0.9504 (0.8612,1.0489)	1		-0.2789 (-0.4553,-0.1026)	1		-3e-04 (-0.0033,0.0027)	1
LEO1		-0.0014068			1.083 (1.003,1.1687)	1		0.3381 (0.1604,0.5159)	0.570959		0.0053 (0.0023,0.0083)	1
LEP	-0.0551343	-0.0896981	-6.43999		1.879 (1.6367,2.1573)	1.01e-15		1.392 (1.1869,1.5974)	0		0.0198 (0.0163,0.0233)	1.59e-24
LEPR	-0.0280156	-0.0447144			0.9193 (0.8343,1.013)	1		-0.3421 (-0.4886,-0.1957)	0.0139058		-0.0028 (-0.0054,-2e-04)	1
LGALS1	0.0009575				1.263 (1.1595,1.3767)	0.0002752		0.4341 (0.2831,0.5851)	5.42e-05		0.0082 (0.0056,0.0108)	2.41e-06
LGALS3	0.0290505	0.0356026			1.124 (1.0247,1.2334)	1		-0.0565 (-0.2052,0.0922)	1		0.0012 (-0.0014,0.0037)	1
LGALS3BP	-0.0004046				1.288 (1.206,1.376)	1.49e-10		0.7077 (0.5338,0.8817)	6.19e-12		0.0114 (0.0084,0.0144)	3.38e-10
LGMN	-0.019956	-0.0230796			1.158 (1.0611,1.263)	1		0.2558 (0.1121,0.3996)	1		0.0047 (0.0023,0.0072)	0.493526
LHB	-0.0003	-0.0017937			1.003 (0.9137,1.1014)	1		-0.1318 (-0.2705,0.0069)	1		-9e-04 (-0.0033,0.0016)	1
LIF	-0.0020822				1.129 (1.0471,1.2165)	1		0.1114 (-0.024,0.2468)	1		0.0032 (9e-04,0.0055)	1
LILRA4	-0.0007423				1.029 (0.9346,1.1322)	1		0.0019 (-0.1572,0.1609)	1		4e-04 (-0.0024,0.0032)	1
LILRA5	-0.0155649	-0.0293592			1.239 (1.132,1.3561)	0.0096894		0.39 (0.2433,0.5367)	0.0005727		0.0105 (0.008,0.013)	1.58e-12
LILRB1	0.0013435				1.389 (1.2696,1.5201)	2.42e-09		0.1933 (0.0536,0.333)	1		0.0068 (0.0044,0.0092)	9.58e-05
LILRB2	0.0134364	0.0117806			1.351 (1.2277,1.4872)	2.2e-06		0.0636 (-0.0784,0.2057)	1		0.0054 (0.0029,0.0078)	0.0528882
LILRB4	0.0011361	0.0102166			1.278 (1.1704,1.396)	0.0001396		0.3647 (0.2125,0.517)	0.0079391		0.0085 (0.006,0.0111)	3.24e-07
LILRB5	0.002082	0.0015567			1.112 (1.013,1.2196)	1		-0.0106 (-0.1451,0.1238)	1		0.0018 (-5e-04,0.0041)	1
LIPF	-0.001866				1.046 (0.9518,1.1486)	1		0.1171 (-0.0592,0.2934)	1		0.0021 (-0.001,0.0051)	1
LMNB2	-0.0012303				1.35 (1.251,1.4577)	3.9e-11		0.5425 (0.354,0.7311)	5.34e-05		0.0075 (0.0043,0.0108)	0.0174356
LMOD1	0.0081044	0.0039468			1.053 (0.9554,1.1597)	1		-0.2728 (-0.4571,-0.0886)	1		-1e-04 (-0.0032,0.003)	1
LPA	-0.0012472	-0.0002242			0.9435 (0.8563,1.0396)	1		-0.1028 (-0.2657,0.06)	1		-8e-04 (-0.0036,0.002)	1
LPCAT2		-8.9e-05			1.067 (0.9913,1.1477)	1		0.1001 (-0.0477,0.248)	1		0.003 (5e-04,0.0055)	1
LPO	-0.0180163	-0.0170821	-2.06594		1.055 (0.9639,1.1557)	1		-0.0312 (-0.1841,0.1217)	1		-8e-04 (-0.0034,0.0018)	1
LRFN2		0.000207			0.9043 (0.8065,1.014)	1		-0.0522 (-0.2112,0.1068)	1		-6e-04 (-0.0032,0.0021)	1
LRIG1	-0.0056274				0.9887 (0.903,1.0826)	1		-0.2303 (-0.3751,-0.0855)	1		9e-04 (-0.0016,0.0034)	1
LRIG3	0.0018121	0.0128058			1.096 (1.0067,1.1942)	1		0.083 (-0.0792,0.2452)	1		6e-04 (-0.0022,0.0034)	1
LRP1	-0.025329	-0.014949			1.153 (1.0555,1.2587)	1		-0.1454 (-0.2865,-0.0042)	1		-0.0039 (-0.0063,-0.0014)	1
LRP2	-0.0070807	-0.0094324			1.028 (0.935,1.1304)	1		-0.0706 (-0.253,0.1118)	1		0.0019 (-0.0012,0.0051)	1
LRPAP1	-0.0008374	-0.006096			1.168 (1.0831,1.2591)	0.157204		0.2465 (0.1039,0.3891)	1		0.002 (-4e-04,0.0044)	1
LRRC25	0.0323628	0.0446075			1.328 (1.2435,1.4177)	7.02e-14		0.2143 (0.0711,0.3575)	1		0.0045 (0.002,0.007)	0.986175
LRRC37A2	-0.0261328	-0.0316481			1.013 (0.9196,1.1169)	1		0.2147 (0.0516,0.3778)	1		0.0028 (0,0.0056)	1
LRRC38		0.0151268			1.002 (0.9075,1.1068)	1		0.0772 (-0.0914,0.2457)	1		0.0018 (-0.0012,0.0047)	1
LRRN1	0.0244926	0.016607			0.9142 (0.8348,1.0012)	1		0.0643 (-0.0813,0.21)	1		-0.0033 (-0.0058,-8e-04)	1
LRTM2	-0.0260957	-0.0186345			0.8684 (0.7794,0.9675)	1		-0.326 (-0.4928,-0.1592)	0.377815		-0.0033 (-0.0061,-5e-04)	1
LSM8	0.0011226				0.9679 (0.8715,1.0749)	1		0.0209 (-0.1363,0.178)	1		1e-04 (-0.0026,0.0028)	1
LTA	0.0083675	0.013122			1.15 (1.0542,1.254)	1		0.1684 (0.0278,0.309)	1		0.0049 (0.0025,0.0073)	0.176167
LTA4H	0.0236127	0.032596			1.008 (0.9217,1.1023)	1		-0.0249 (-0.163,0.1132)	1		0.0014 (-0.001,0.0038)	1
LTB	0.0039261	0.00012			1.086 (0.9959,1.1853)	1		0.133 (-0.0218,0.2878)	1		0.0038 (0.0011,0.0064)	1
LTBP2	-0.0564442	-0.0084262			1.275 (1.1526,1.411)	0.0071384		-0.5033 (-0.6767,-0.3299)	3.95e-05		-0.0021 (-0.0051,9e-04)	1
LTBR	0.0012111	0.0073262			1.244 (1.149,1.3473)	0.0002191		0.0771 (-0.0808,0.2349)	1		0.0073 (0.0046,0.01)	0.0004097
LY6D	-0.0355926	-0.0473105			1.115 (1.0266,1.2102)	1		-0.0471 (-0.2008,0.1066)	1		0.0034 (8e-04,0.0061)	1
LY96	0.0025228	0.0025542			1.182 (1.0901,1.2825)	0.155655		0.1834 (0.0415,0.3254)	1		0.006 (0.0036,0.0085)	0.0053034
LYAR	-0.0066037	-0.0108784			1.009 (0.922,1.1031)	1		0.1198 (-0.0156,0.2552)	1		0.0036 (0.0012,0.0059)	1
LYPD1	0.0022235	0.0034677			1.003 (0.9168,1.0969)	1		-0.0835 (-0.2181,0.0511)	1		-9e-04 (-0.0032,0.0014)	1
LYPD8	0.0103645	0.0070259			1.1 (1.0121,1.1964)	1		0.0429 (-0.0912,0.1769)	1		6e-04 (-0.0017,0.0029)	1
LYPLA2		3.99e-05			1.081 (0.9875,1.1824)	1		0.0487 (-0.1177,0.2151)	1		-4e-04 (-0.0033,0.0025)	1
LYSMD3	0.0011578				1.04 (0.9462,1.1436)	1		-0.1482 (-0.3147,0.0184)	1		2e-04 (-0.0027,0.003)	1
LYZL2	-0.0083264	-0.0232555			0.9627 (0.8639,1.073)	1		-0.2147 (-0.4057,-0.0237)	1		-0.0011 (-0.0044,0.0021)	1
M6PR		0.0076206			1.062 (0.9697,1.1624)	1		0.0523 (-0.1027,0.2073)	1		5e-04 (-0.0022,0.0031)	1
MAD1L1	-0.000389				1.238 (1.163,1.3176)	5.91e-08		0.4968 (0.3362,0.6575)	4.25e-06		0.009 (0.0062,0.0118)	4.96e-07
MAGED1	-0.0047835	-0.0027439			1.071 (0.9814,1.169)	1		0.0308 (-0.1009,0.1625)	1		0.0012 (-0.0011,0.0035)	1
MAMDC2	0.0186381	0.0432837			1.218 (1.108,1.3393)	0.130993		0.3043 (0.1251,0.4834)	1		0.0073 (0.0042,0.0104)	0.0112409
MAN1A2	0.0039816				1.272 (1.1479,1.4088)	0.0123133		0.0765 (-0.0946,0.2477)	1		-0.0011 (-0.0041,0.0018)	1
MANSC1	0.0368762	0.0350239			1.044 (0.9545,1.1413)	1		-0.375 (-0.5182,-0.2318)	0.0008678		0.0016 (-9e-04,0.0041)	1
MANSC4		0.0023228			1.029 (0.9322,1.1359)	1		-0.0499 (-0.2243,0.1246)	1		3e-04 (-0.0027,0.0033)	1
MAP1LC3B2	-0.0020852	-0.0046699			1.026 (0.9372,1.1236)	1		0.073 (-0.104,0.2501)	1		-1e-04 (-0.0032,0.0029)	1
MAP2		0.0029369			1.176 (1.0809,1.28)	0.490312		0.0175 (-0.1513,0.1863)	1		0.0017 (-0.0012,0.0047)	1
MAPK13	-0.0014203	0.0078868			1.057 (0.9626,1.1608)	1		0.1706 (-0.0083,0.3495)	1		6e-04 (-0.0024,0.0036)	1
MAPT	-0.0004864				1.08 (0.9823,1.1868)	1		0.0211 (-0.1178,0.16)	1		0.001 (-0.0013,0.0034)	1
MARCO	-0.0083042	-0.0079762			1.301 (1.1869,1.4263)	5.74e-05		0.2305 (0.0894,0.3716)	1		0.0055 (0.0031,0.0079)	0.0221838
MATN3	0.0236899	0.0153917			0.9607 (0.877,1.0523)	1		-0.4494 (-0.597,-0.3017)	7.69e-06		-0.0044 (-0.007,-0.0019)	1
MAX	0.0021422	0.003898			1.087 (0.9921,1.1907)	1		0.1063 (-0.0347,0.2474)	1		0.0022 (-2e-04,0.0046)	1
MB	0.011509	0.0322658	1.48434		1.076 (0.9768,1.1847)	1		0.2359 (0.0712,0.4006)	1		0.0051 (0.0022,0.0079)	1
MBL2		-0.000196			1.008 (0.9143,1.1107)	1		-0.0247 (-0.1901,0.1408)	1		0.0023 (-6e-04,0.0051)	1
MCAM	0.0112359	0.0250437			0.9643 (0.8777,1.0595)	1		-0.4188 (-0.5644,-0.2731)	5.36e-05		-0.0041 (-0.0066,-0.0016)	1
MCTS1	0.0221045	0.0130608			1.048 (0.961,1.1433)	1		0.0137 (-0.1568,0.1843)	1		3e-04 (-0.0026,0.0032)	1
MDGA1	-0.0014907	-0.0025507			1.141 (1.0413,1.25)	1		0.1299 (-0.0113,0.2712)	1		0.0013 (-0.0011,0.0037)	1
MDK	0.0027923				1.151 (1.0622,1.248)	1		-0.0292 (-0.1702,0.1118)	1		0.0016 (-8e-04,0.0041)	1
MEGF10	0.011473	0.015073			0.9515 (0.8693,1.0414)	1		-0.0536 (-0.1925,0.0853)	1		-0.0012 (-0.0036,0.0012)	1
MEGF9	-0.0080129	-0.0172264			1.243 (1.1698,1.3197)	4.89e-09		0.5018 (0.3613,0.6422)	8.33e-09		0.0051 (0.0027,0.0076)	0.0917216
MENT	-0.0329372	-0.0060572			0.7393 (0.6706,0.8152)	3.92e-06		-0.5811 (-0.7698,-0.3924)	5.15e-06		-0.0074 (-0.0106,-0.0041)	0.029483
MEP1A	0.0001037				1.084 (0.9835,1.1948)	1		0.521 (0.3481,0.6939)	1.12e-05		0.0045 (0.0015,0.0074)	1
MEP1B		-0.0041319			1.032 (0.9423,1.1305)	1		0.2528 (0.1132,0.3925)	1		0.004 (0.0017,0.0064)	1
MEPE	0.0966175	0.1151	22.552		0.944 (0.8617,1.0342)	1		0.0478 (-0.1059,0.2016)	1		0.0019 (-8e-04,0.0045)	1
MERTK	0.0255572	0.0527705			1.187 (1.084,1.2994)	0.620925		-0.2215 (-0.3718,-0.0711)	1		-0.0014 (-0.004,0.0012)	1
MET	0.0258102	0.0026652			0.8079 (0.7368,0.8858)	0.0164246		-0.8209 (-0.9661,-0.6756)	1.14e-24		-0.0102 (-0.0127,-0.0077)	7.12e-12
METAP1	0.0021694				0.9972 (0.9092,1.0938)	1		0.0636 (-0.0616,0.1888)	1		4e-04 (-0.0017,0.0026)	1
METAP1D	-0.0048646	-0.0024806			1.149 (1.0523,1.2549)	1		0.0984 (-0.0374,0.2342)	1		0.0028 (4e-04,0.0051)	1
MFAP3L	0.0009826				0.9546 (0.8589,1.061)	1		-0.1208 (-0.282,0.0404)	1		1e-04 (-0.0027,0.0028)	1
MFAP4	-0.0005233				1.499 (1.3618,1.6505)	4.42e-13		0.2466 (0.0689,0.4242)	1		0.0017 (-0.0013,0.0047)	1
MFAP5	0.0039141				1.155 (1.0538,1.2656)	1		0.349 (0.2021,0.4958)	0.009552		0.0077 (0.0052,0.0102)	8.31e-06
MICB_MICA	0.0007881				1.037 (0.946,1.1372)	1		0.063 (-0.0739,0.2)	1		0.0038 (0.0014,0.0061)	1
MIF	-0.0151484	-0.0080301			1.104 (1.0071,1.2106)	1		0.1778 (0.0385,0.3171)	1		0.0021 (-3e-04,0.0044)	1
MILR1	-0.0100783	-0.0116717			1.25 (1.1473,1.3616)	0.0009768		0.0529 (-0.0887,0.1945)	1		0.003 (5e-04,0.0054)	1
MITD1	-0.0009179				1.076 (0.9822,1.1788)	1		0.1003 (-0.0372,0.2378)	1		0.0027 (3e-04,0.005)	1
MKI67		-0.0061357			1.034 (0.942,1.1356)	1		0.0426 (-0.1392,0.2243)	1		0.0014 (-0.0017,0.0044)	1
MLLT1		-0.0007073			0.9557 (0.8603,1.0616)	1		0.0191 (-0.1311,0.1693)	1		4e-04 (-0.0022,0.003)	1
MLN		0.0011722			1.1 (0.9984,1.2119)	1		0.115 (-0.0328,0.2627)	1		0.0044 (0.0019,0.007)	1
MMP12	-0.0281356	-0.0288848	-2.37997		1.145 (1.0387,1.2611)	1		-0.0291 (-0.1934,0.1352)	1		0.0041 (0.0013,0.007)	1
MMP3	0.0235048	0.0274748	2.98021		1.019 (0.9101,1.1415)	1		-0.3015 (-0.4912,-0.1118)	1		-1e-04 (-0.0033,0.0032)	1
MMP7	-0.0122215	-0.0035022	-2.25969		1.354 (1.2279,1.4939)	3.87e-06		0.0681 (-0.0686,0.2047)	1		0.0025 (2e-04,0.0048)	1
MMP8	0.0013994				1.159 (1.062,1.2652)	1		0.3435 (0.203,0.484)	0.0049732		0.0075 (0.0051,0.0099)	2.23e-06
MN1	0.00087				0.9641 (0.8703,1.0679)	1		0.0033 (-0.1569,0.1636)	1		6e-04 (-0.0021,0.0033)	1
MOCS2	-0.006471	-0.0075028			1.239 (1.1288,1.3591)	0.0181778		0.2444 (0.0767,0.412)	1		0.0029 (0,0.0057)	1
MOG	-0.042777	-0.048742			0.9394 (0.8588,1.0276)	1		-0.3427 (-0.4956,-0.1898)	0.0331647		-0.0048 (-0.0075,-0.0022)	1
MORC3	-0.0073824	-0.0119911			0.971 (0.8749,1.0777)	1		0.0917 (-0.0692,0.2526)	1		7e-04 (-0.002,0.0035)	1
MORF4L1	0.0010639				0.9646 (0.8704,1.069)	1		-0.0864 (-0.2393,0.0664)	1		4e-04 (-0.0022,0.003)	1
MORF4L2	-0.0052362	-0.0027327			0.9139 (0.8168,1.0225)	1		0.1112 (-0.0453,0.2676)	1		0.0024 (-2e-04,0.0051)	1
MORN4		-0.0002107			0.9207 (0.8251,1.0275)	1		0.064 (-0.1019,0.2298)	1		0.0016 (-0.0013,0.0044)	1
MPO	-0.0102914	-0.013956			1.18 (1.0863,1.2812)	0.253308		0.292 (0.1485,0.4355)	0.195979		0.0057 (0.0033,0.0082)	0.0134237
MPRIP	0.0043447	0.0047827			0.9942 (0.9003,1.098)	1		0.203 (0.0368,0.3692)	1		0.0021 (-7e-04,0.005)	1
MRC1		0.0001327			1.38 (1.2584,1.5128)	2.1e-08		0.4095 (0.2279,0.5911)	0.0297752		0.0079 (0.0048,0.011)	0.0017211
MRPL24	-0.0002694				1.126 (1.0402,1.218)	1		0.0275 (-0.1279,0.1829)	1		8e-04 (-0.0019,0.0035)	1
MRPL28		-0.0047462			1.032 (0.9454,1.1273)	1		0.0998 (-0.0619,0.2615)	1		-1e-04 (-0.0028,0.0025)	1
MRPL58	-0.0002203				1.017 (0.9242,1.1184)	1		-0.0265 (-0.1895,0.1366)	1		0.0011 (-0.0017,0.0038)	1
MSLN	0.0012006	0.0185438			0.9882 (0.9003,1.0847)	1		-0.1385 (-0.303,0.026)	1		0.003 (2e-04,0.0058)	1
MSLNL	0.0088334	0.0129386			1.068 (0.9735,1.1718)	1		-0.1867 (-0.3583,-0.0152)	1		-0.0014 (-0.0043,0.0014)	1
MSMB		0.0026154			1.006 (0.9128,1.1083)	1		-0.1457 (-0.2998,0.0084)	1		-1e-04 (-0.0027,0.0026)	1
MSR1		0.0042086			1.695 (1.5472,1.8563)	2.09e-26		0.6969 (0.5488,0.8451)	1.32e-16		0.0083 (0.0057,0.011)	1.96e-06
MSTN	-0.0064865	-0.003911			1.003 (0.9097,1.1069)	1		0.3099 (0.1476,0.4722)	0.538817		0.0021 (-7e-04,0.0049)	1
MTHFD2	-0.00792	-0.033774			1.031 (0.9393,1.1327)	1		-0.0532 (-0.221,0.1145)	1		-0.0019 (-0.0048,0.001)	1
MTHFSD	0.0069804				1.075 (0.9756,1.1836)	1		0.231 (0.0617,0.4004)	1		0.0032 (3e-04,0.0061)	1
MTR		0.0019818			1.046 (0.9526,1.1496)	1		0.1321 (-0.0254,0.2897)	1		-1e-04 (-0.0027,0.0026)	1
MUC16		0.0017946			1.026 (0.9367,1.1245)	1		0.0622 (-0.0681,0.1925)	1		-0.0014 (-0.0037,9e-04)	1
MUCL3		-0.000668			0.9632 (0.8664,1.0707)	1		-0.003 (-0.1507,0.1448)	1		-3e-04 (-0.0028,0.0022)	1
MXRA8	-0.0276544	-0.0151775			0.8077 (0.7226,0.9029)	0.504045		-0.8601 (-1.0587,-0.6616)	9.1e-14		-0.0106 (-0.014,-0.0072)	2.96e-06
MYBPC1	-0.0055981	-0.0092397			1.119 (1.0168,1.2321)	1		0.1208 (-0.0603,0.3018)	1		0.0027 (-4e-04,0.0058)	1
MYBPC2	-0.0072653	-0.0104004			1.139 (1.0463,1.2405)	1		-0.0078 (-0.175,0.1594)	1		0.0023 (-6e-04,0.0051)	1
MYCBP2	0.0003926				1.02 (0.9274,1.122)	1		0.0608 (-0.1104,0.232)	1		0.001 (-0.002,0.004)	1
MYL1	-0.004808	-0.0079684			1.006 (0.9136,1.1087)	1		-0.0094 (-0.1714,0.1526)	1		0.0018 (-9e-04,0.0046)	1
MYL3	-0.0087485	-0.0140085			1.144 (1.0366,1.2635)	1		0.105 (-0.0739,0.2839)	1		0.0027 (-4e-04,0.0057)	1
MYL4		-0.000709			1.055 (0.9599,1.1603)	1		0.1312 (-0.0246,0.287)	1		0.0018 (-8e-04,0.0045)	1
MYLPF	-0.0138789	-0.0119989			1.11 (1.0221,1.2049)	1		0.0251 (-0.1707,0.2209)	1		0.0017 (-0.0017,0.005)	1
MYO6	-0.0068114	-0.0007748			1.004 (0.9128,1.1052)	1		0.026 (-0.1432,0.1953)	1		6e-04 (-0.0023,0.0036)	1
MYOC	-0.0266426	-0.0408378			1.034 (0.9435,1.134)	1		-0.0839 (-0.2256,0.0578)	1		-0.0017 (-0.0042,7e-04)	1
MYOM1		0.0047142			1.102 (1.0178,1.1936)	1		0.0712 (-0.0858,0.2281)	1		6e-04 (-0.002,0.0033)	1
MYOM3	0.0369239	0.0474909	0.840407		1.082 (0.978,1.1959)	1		0.0455 (-0.1324,0.2234)	1		5e-04 (-0.0025,0.0036)	1
MZB1	-0.0287524	-0.0187028			1.166 (1.0674,1.2743)	1		0.22 (0.069,0.371)	1		0.009 (0.0065,0.0116)	2.26e-08
MZT1	0.0033905	0.0027579			0.9994 (0.9121,1.0951)	1		0.0107 (-0.118,0.1394)	1		0.001 (-0.0012,0.0032)	1
NADK	-0.0015355	-0.0094792			1.103 (1.0138,1.2001)	1		0.3138 (0.1669,0.4608)	0.084475		0.0052 (0.0027,0.0078)	0.161148
NAGPA	0.0021307				1.43 (1.2994,1.5731)	6.65e-10		0.6634 (0.4863,0.8405)	7.78e-10		0.0053 (0.0023,0.0084)	1
NAP1L4	0.0075154				1.014 (0.9199,1.1171)	1		0.13 (-0.0361,0.2961)	1		9e-04 (-0.0019,0.0038)	1
NAPRT	0.004399				1.121 (1.0256,1.2242)	1		0.133 (-0.0335,0.2995)	1		0.0018 (-0.001,0.0046)	1
NBL1	0.0267237	0.0297835			1.172 (1.0747,1.2792)	1		-0.0287 (-0.1796,0.1223)	1		0.0049 (0.0023,0.0075)	0.755629
NBN	0.0008962	0.0048007			1.119 (1.0379,1.2056)	1		0.1908 (0.0475,0.3342)	1		0.0033 (8e-04,0.0057)	1
NCAM1	0.0066626	0.0140606			0.8925 (0.8122,0.9808)	1		-0.2536 (-0.4032,-0.104)	1		-0.0048 (-0.0074,-0.0023)	0.680534
NCAM2	0.0033051	0.0184276			0.9069 (0.8259,0.996)	1		-0.4893 (-0.6318,-0.3468)	5.6e-08		-0.006 (-0.0084,-0.0035)	0.0044531
NCAN	-0.0643245	-0.0952408	-8.76189		0.879 (0.8002,0.9656)	1		-0.3239 (-0.481,-0.1669)	0.156765		-0.0057 (-0.0084,-0.003)	0.109721
NCLN	6.26e-05				0.9825 (0.8928,1.0813)	1		-0.0956 (-0.2264,0.0352)	1		-0.0013 (-0.0035,9e-04)	1
NCR1	-0.0049703	-0.0196826			1.12 (1.0249,1.2237)	1		0.0486 (-0.1046,0.2018)	1		0.0071 (0.0045,0.0098)	0.0004368
NCR3LG1	0.0249784	0.0273461			1.161 (1.0521,1.2809)	1		-0.2736 (-0.4605,-0.0868)	1		4e-04 (-0.0028,0.0037)	1
NCS1	0.0013959				1.107 (1.0057,1.218)	1		0.0246 (-0.1318,0.181)	1		-0.0012 (-0.0039,0.0015)	1
NDST1	0.0004637	0.000395			0.9451 (0.8518,1.0486)	1		-0.0217 (-0.1847,0.1414)	1		0.0035 (7e-04,0.0062)	1
NDUFA5		-0.0022203			1.168 (1.0635,1.2832)	1		-0.0256 (-0.1955,0.1444)	1		0.0026 (-3e-04,0.0055)	1
NDUFS6	0.0005394				1.139 (1.0566,1.2273)	1		0.0757 (-0.0536,0.2051)	1		0.0013 (-0.001,0.0036)	1
NEB		-0.0030332			1.047 (0.9541,1.1483)	1		0.1032 (-0.0624,0.2689)	1		-6e-04 (-0.0034,0.0022)	1
NECAP2	-0.0028852				1.03 (0.9344,1.1355)	1		0.2256 (0.0553,0.396)	1		0.001 (-0.0019,0.004)	1
NECTIN1	-0.0030483	-0.0101608			1.004 (0.9079,1.1103)	1		0.0399 (-0.1384,0.2181)	1		0.0017 (-0.0014,0.0047)	1
NECTIN2	-0.0004922	-0.0048156			1.248 (1.1489,1.3561)	0.0004672		0.1865 (0.0296,0.3435)	1		0.0084 (0.0057,0.0111)	3.78e-06
NEDD4L	-0.0033275				1.104 (0.9959,1.224)	1		0.2129 (0.0449,0.3808)	1		0.0024 (-4e-04,0.0053)	1
NEFL	-0.0441643	-0.0552171	-5.74931		1.046 (0.9448,1.1591)	1		-0.359 (-0.529,-0.1889)	0.104578		-0.0025 (-0.0054,4e-04)	1
NEK7	0.0013583				1.078 (0.9854,1.1788)	1		-0.1128 (-0.2732,0.0477)	1		-0.0011 (-0.0038,0.0017)	1
NELL2	0.0502413	0.002285			1.136 (1.0401,1.2408)	1		-0.1158 (-0.2636,0.032)	1		-4e-04 (-0.003,0.0021)	1
NEO1		0.0008823			0.9832 (0.8896,1.0866)	1		0.078 (-0.0951,0.2511)	1		0.0016 (-0.0015,0.0047)	1
NFASC	0.0072437	0.0137656			1.653 (1.5168,1.8006)	4.68e-27		0.6579 (0.5017,0.8141)	5.75e-13		0.0069 (0.0042,0.0096)	0.0017815
NFAT5		-0.0012621			1.056 (0.9582,1.1637)	1		0.006 (-0.1628,0.1747)	1		9e-04 (-0.002,0.0037)	1
NFATC3	0.0115242	0.0103898			1.35 (1.2551,1.4523)	2.17e-12		0.4842 (0.3458,0.6226)	2.34e-08		0.0048 (0.0024,0.0071)	0.217777
NFIC	-0.0054543	-0.007788			1.015 (0.9235,1.1158)	1		0.0569 (-0.0981,0.212)	1		4e-04 (-0.0022,0.003)	1
NFU1	-0.0072599	-0.0017636			1.077 (0.978,1.186)	1		0.0662 (-0.1003,0.2328)	1		0.0013 (-0.0015,0.0042)	1
NFX1	0.0037871	0.000298			1.042 (0.9456,1.148)	1		0.2139 (0.0453,0.3825)	1		0.0016 (-0.0013,0.0045)	1
NGF		0.0243713			1.078 (0.9922,1.1706)	1		0.036 (-0.0914,0.1635)	1		2e-04 (-0.002,0.0024)	1
NGFR	0.0022861	0.0035743			0.9582 (0.8662,1.06)	1		0.0872 (-0.0679,0.2422)	1		0.0013 (-0.0014,0.0039)	1
NGRN		0.0066709			1.161 (1.0754,1.2523)	0.371678		0.2563 (0.0784,0.4341)	1		0.0015 (-0.0016,0.0046)	1
NID1	0.0105567	0.0097033			1.176 (1.077,1.2845)	0.894424		0.0345 (-0.1102,0.1792)	1		0.0039 (0.0014,0.0063)	1
NID2	-0.0019367	-0.0135317			1.123 (1.0291,1.2262)	1		0.1479 (0.0104,0.2854)	1		0.0041 (0.0018,0.0065)	1
NIT1	-0.0024361	-0.003483			1.108 (0.998,1.2309)	1		0.2428 (0.0809,0.4046)	1		0.0021 (-7e-04,0.0048)	1
NIT2	-0.0022118				1.378 (1.2483,1.5207)	5.67e-07		0.5555 (0.3878,0.7231)	2.8e-07		0.0052 (0.0023,0.0081)	1
NLGN1		0.0026312			1.002 (0.9079,1.1053)	1		-0.0029 (-0.1726,0.1668)	1		8e-04 (-0.0021,0.0037)	1
NME3	0.020367	0.0420739			1.078 (0.9929,1.1709)	1		-0.1132 (-0.2417,0.0153)	1		-5e-04 (-0.0026,0.0017)	1
NMI	-0.0023667				1.024 (0.9304,1.128)	1		0.0164 (-0.1534,0.1861)	1		-0.001 (-0.0039,0.0019)	1
NMRK2	-0.0020767				0.8797 (0.7775,0.9954)	1		-0.0067 (-0.1498,0.1364)	1		-0.0013 (-0.0038,0.0011)	1
NMT1	-0.0010329				1.033 (0.9403,1.1348)	1		0.049 (-0.1155,0.2136)	1		8e-04 (-0.002,0.0035)	1
NOMO1	-0.0079375	-0.0001319			1.395 (1.3122,1.4824)	3.26e-23		0.8052 (0.6646,0.9458)	2.28e-25		0.0091 (0.0067,0.0115)	6.72e-10
NOP56	-0.0008844	-0.0034663			1.052 (0.9591,1.1545)	1		-0.0314 (-0.193,0.1302)	1		3e-04 (-0.0025,0.0032)	1
NOS1	0.007726	0.0044076			1.065 (0.9685,1.17)	1		0.0315 (-0.1163,0.1792)	1		0.0033 (8e-04,0.0058)	1
NOS2	0.0108443	0.0013593			1.079 (0.9819,1.1846)	1		0.0661 (-0.098,0.2302)	1		0.0042 (0.0014,0.007)	1
NOS3	-0.0009399	-0.0044913			1.165 (1.0755,1.2613)	0.517778		0.3936 (0.2418,0.5455)	0.0011428		0.0054 (0.0029,0.0079)	0.0868711
NOTCH1	-0.061812	-0.0642051			1.066 (0.9736,1.1661)	1		0.0051 (-0.138,0.1482)	1		0.0025 (1e-04,0.005)	1
NOTCH2	-0.0045233				1.028 (0.9356,1.1306)	1		-0.0643 (-0.2419,0.1133)	1		-0.0025 (-0.0057,7e-04)	1
NOTCH3	-0.0089091	-0.0073284			1.068 (0.9727,1.1738)	1		-0.5585 (-0.7126,-0.4043)	4.15e-09		-0.0021 (-0.0048,6e-04)	1
NPC2		-0.0240289			1.266 (1.1697,1.3703)	1.5e-05		0.4096 (0.2107,0.6084)	0.16144		0.0102 (0.0067,0.0136)	2.49e-05
NPDC1	0.0008036				1.161 (1.0709,1.2591)	0.861406		0.1862 (0.0192,0.3532)	1		0.0066 (0.0038,0.0095)	0.0178973
NPHS1	-0.007566	-0.0120131			1.065 (0.9699,1.1693)	1		0.083 (-0.074,0.24)	1		-0.0032 (-0.0058,-5e-04)	1
NPPB	-0.0027647	-0.0022036			0.9941 (0.907,1.0894)	1		-0.1479 (-0.2908,-0.005)	1		-0.0016 (-0.0041,8e-04)	1
NPPC	-0.016771	-0.0192307			1.205 (1.1027,1.3177)	0.115594		0.514 (0.3371,0.691)	3.85e-05		0.0073 (0.0043,0.0103)	0.0062881
NPR1	0.0021113				0.9065 (0.8093,1.0154)	1		-0.0406 (-0.1909,0.1096)	1		-0.0011 (-0.0037,0.0015)	1
NPTX1	-0.0333475	-0.0322598	-3.05789		1.047 (0.9559,1.1461)	1		-0.113 (-0.2618,0.0358)	1		-0.0033 (-0.0058,-7e-04)	1
NPTX2	0.0030915				1.018 (0.9086,1.1416)	1		0.0226 (-0.1718,0.2169)	1		-4e-04 (-0.0037,0.0029)	1
NPY	0.0035615	0.0133081			1.223 (1.112,1.346)	0.10189		0.3321 (0.1929,0.4712)	0.0087485		0.0018 (-6e-04,0.0042)	1
NRCAM	0.007837				1.142 (1.0476,1.2454)	1		0.1597 (0.0165,0.3028)	1		0.0026 (1e-04,0.0051)	1
NRP1		-0.0077779			1.222 (1.1199,1.3335)	0.019706		-0.2285 (-0.3715,-0.0856)	1		9e-04 (-0.0015,0.0034)	1
NRP2	0.0213351				1.209 (1.1107,1.3164)	0.0344796		-0.163 (-0.3058,-0.0203)	1		0.0022 (-2e-04,0.0047)	1
NRTN	0.0085608	0.0073209			1.083 (0.9978,1.1751)	1		0.0278 (-0.1079,0.1636)	1		0.0019 (-4e-04,0.0042)	1
NRXN3	-0.019039	-0.0064545			0.9697 (0.8745,1.0754)	1		-0.1028 (-0.2678,0.0621)	1		2e-04 (-0.0026,0.003)	1
NSFL1C	0.0061675				1.051 (0.9596,1.1506)	1		0.2278 (0.0881,0.3675)	1		0.003 (6e-04,0.0054)	1
NT5C	0.0003111	0.0022775			1.027 (0.9316,1.1321)	1		0.0766 (-0.0856,0.2388)	1		4e-04 (-0.0024,0.0031)	1
NTF3	0.0188252	0.0149997			0.9839 (0.8989,1.077)	1		-0.1042 (-0.2456,0.0372)	1		-6e-04 (-0.003,0.0019)	1
NTF4	0.0011045				0.9505 (0.8592,1.0514)	1		-0.0763 (-0.2126,0.06)	1		-0.0017 (-0.0041,7e-04)	1
NTPROBNP	-0.005936	-0.0108254	-0.695146		0.9682 (0.8801,1.0652)	1		-0.5772 (-0.7434,-0.4111)	3.27e-08		4e-04 (-0.0025,0.0033)	1
NTRK2	-0.0093111	-0.0012172			1.019 (0.9305,1.1158)	1		0.1613 (0.0192,0.3034)	1		0.0014 (-0.001,0.0039)	1
NTRK3	0.0490828	0.048277			0.8387 (0.763,0.9219)	0.778713		-0.5479 (-0.6974,-0.3984)	2.32e-09		-0.0073 (-0.0099,-0.0047)	7.77e-05
NUB1		-0.0060782			1.094 (1.0022,1.1934)	1		0.0766 (-0.0638,0.217)	1		0.0026 (2e-04,0.005)	1
NUCB2	-0.0047074	-0.0064991			1.185 (1.0861,1.2922)	0.386288		0.2234 (0.0795,0.3673)	1		0.0054 (0.0029,0.0078)	0.059375
NUDT10	-0.0111119	-0.0039463			0.9793 (0.8835,1.0854)	1		-0.0836 (-0.2548,0.0877)	1		0 (-0.0031,0.0032)	1
NUDT15	-0.0024501	-0.0044206			1.04 (0.9461,1.1429)	1		-0.0419 (-0.204,0.1203)	1		2e-04 (-0.0026,0.003)	1
NUDT5	-0.0049414	-0.0170617			1.229 (1.1284,1.3375)	0.0060807		0.264 (0.1216,0.4064)	0.820498		0.0036 (0.0012,0.0061)	1
NXPE4		-0.0005365			0.8748 (0.7792,0.982)	1		0.0818 (-0.0733,0.2368)	1		-1e-04 (-0.0028,0.0026)	1
NXPH1	0.002557	0.0062534			0.9456 (0.8613,1.0381)	1		-0.164 (-0.3104,-0.0175)	1		-0.0028 (-0.0053,-2e-04)	1
NXPH3	0.0330003	0.0140209			0.8007 (0.7271,0.8817)	0.0181748		-0.2945 (-0.4748,-0.1143)	1		-0.005 (-0.0081,-0.0019)	1
OBP2B	0.0195896	0.0218172	4.41605		0.833 (0.7481,0.9275)	1		-0.4872 (-0.6519,-0.3224)	2.13e-05		-0.0058 (-0.0086,-0.0029)	0.18581
OCLN	0.0111739				1.528 (1.4215,1.6435)	6.06e-27		0.4405 (0.256,0.6249)	0.0086433		0.0127 (0.0096,0.0159)	1.04e-11
ODAM		-0.0002037			0.956 (0.8692,1.0516)	1		-0.0509 (-0.1919,0.09)	1		0.0019 (-5e-04,0.0043)	1
OFD1	-0.0014707				1.006 (0.9141,1.1064)	1		-0.036 (-0.1981,0.1262)	1		5e-04 (-0.0023,0.0033)	1
OGFR	0.0066426				1.164 (1.0634,1.274)	1		0.2026 (0.0635,0.3416)	1		0.0034 (0.001,0.0058)	1
OGN	-0.0140502	-0.0227962	-7.70278		1.117 (1.0197,1.2236)	1		0.1364 (-0.0314,0.3041)	1		0.0068 (0.0039,0.0097)	0.0104023
OLFM4	0.0016448				1.103 (0.9967,1.2196)	1		0.204 (0.0381,0.3699)	1		0.0034 (6e-04,0.0062)	1
OMD	-0.0175045	-0.0221262			0.9975 (0.9088,1.0949)	1		-0.319 (-0.4714,-0.1666)	0.120474		-0.004 (-0.0066,-0.0014)	1
OMG	0.0309236	0.0599275			1.041 (0.9524,1.1376)	1		-0.1504 (-0.2931,-0.0077)	1		-0.0044 (-0.0068,-0.0019)	1
OPLAH		-0.0023808			1.153 (1.0475,1.2683)	1		0.115 (-0.049,0.279)	1		0.0015 (-0.0013,0.0043)	1
OPTC	-0.0455977	-0.0612737	-4.67777		0.9296 (0.8428,1.0253)	1		-0.2439 (-0.385,-0.1027)	1		-0.0025 (-0.0049,-1e-04)	1
OSMR	-0.05865	-0.0851632	-5.11238		1.242 (1.1364,1.3564)	0.0048564		0.1051 (-0.0391,0.2493)	1		0.0044 (0.0019,0.007)	1
OSTN	-0.0175492	-0.0206175			0.9533 (0.8577,1.0596)	1		-0.0067 (-0.1707,0.1572)	1		0.0014 (-0.0013,0.0042)	1
OTOA	-0.0014829	-0.0008056			1.082 (0.9942,1.1767)	1		-0.13 (-0.2815,0.0215)	1		-9e-04 (-0.0036,0.0017)	1
OXT	-0.0006069	-0.0059313			1.467 (1.3327,1.6143)	1.38e-11		0.9578 (0.8094,1.1062)	1.46e-32		0.0085 (0.006,0.0111)	2.22e-07
PADI2	-0.005323	-0.0080461			1.037 (0.9499,1.1314)	1		-0.092 (-0.2314,0.0474)	1		-3e-04 (-0.0027,0.002)	1
PADI4	-0.0038754	-0.0055573			0.919 (0.8336,1.0132)	1		0.0921 (-0.0532,0.2374)	1		0.0019 (-5e-04,0.0044)	1
PAEP		-0.0007994			0.9699 (0.8741,1.0762)	1		-0.0405 (-0.1788,0.0979)	1		0.0028 (4e-04,0.0052)	1
PAFAH2	-0.001469				1.078 (0.9818,1.1842)	1		0.1039 (-0.0525,0.2603)	1		0.0018 (-0.001,0.0045)	1
PAG1	-0.0017475				1.078 (0.9825,1.182)	1		0.1843 (0.0363,0.3324)	1		0.0055 (0.003,0.0081)	0.0620633
PAGR1		-0.0045866			1.052 (0.9588,1.1537)	1		0.2946 (0.125,0.4642)	1		0.0027 (-2e-04,0.0056)	1
PALM		0.0231375			1.167 (1.0677,1.2749)	1		0.3122 (0.1212,0.5032)	1		0.0054 (0.0021,0.0086)	1
PAM	-0.0055865	-0.0039724			1.205 (1.0963,1.3236)	0.312654		0.009 (-0.1338,0.1518)	1		0.0015 (-0.001,0.0039)	1
PAPPA		0.0057552			1.137 (1.034,1.2506)	1		0.0787 (-0.0671,0.2246)	1		0.002 (-5e-04,0.0046)	1
PARD3	0.002237				0.9963 (0.9021,1.1003)	1		0.0454 (-0.1188,0.2097)	1		0.001 (-0.0018,0.0038)	1
PARP1	-0.0037185	-0.0004643			1.194 (1.1216,1.2721)	9.21e-05		0.4954 (0.351,0.6398)	5.84e-08		0.0061 (0.0036,0.0085)	0.0038658
PCBD1		0.0041964			1.733 (1.6214,1.8532)	0		1.547 (1.3618,1.7318)	0		0.0171 (0.0139,0.0203)	4.08e-21
PCDH12	-0.0160388	-0.0287341			1.163 (1.0579,1.2794)	1		0.1101 (-0.0555,0.2758)	1		-5e-04 (-0.0033,0.0024)	1
PCDH17	0.0889011	0.116298	5.98233		1.326 (1.2214,1.4403)	5.48e-08		0.032 (-0.1152,0.1791)	1		0.0052 (0.0027,0.0077)	0.177395
PCDHB15	-0.0058374	-0.0103892			1.151 (1.0583,1.2521)	1		-0.0558 (-0.2218,0.1101)	1		0.0031 (3e-04,0.006)	1
PCSK7	0.0031667				1.101 (1.011,1.1981)	1		0.2085 (0.0396,0.3774)	1		0.0028 (-1e-04,0.0056)	1
PCSK9	0.010662	0.008089			1.227 (1.1156,1.3505)	0.0761473		0.2959 (0.148,0.4437)	0.258655		0.0035 (9e-04,0.0061)	1
PDCD1	0.0111361	0.0041014			1.204 (1.1111,1.3041)	0.0164947		-0.1436 (-0.2877,5e-04)	1		0.0031 (6e-04,0.0056)	1
PDCD1LG2	-0.0234099	-0.0260793			1.089 (0.997,1.1885)	1		-0.0301 (-0.17,0.1098)	1		0.0034 (0.001,0.0058)	1
PDCD5	-0.0010379				1.121 (1.0256,1.2263)	1		0.2661 (0.1266,0.4056)	0.542908		0.0037 (0.0013,0.0061)	1
PDCD6	-0.0009138				1.257 (1.1226,1.4066)	0.208806		-0.0625 (-0.2025,0.0775)	1		-6e-04 (-0.0031,0.0019)	1
PDE4D	0.0062587	0.0074207			1.037 (0.9442,1.1394)	1		-0.1196 (-0.2804,0.0412)	1		-8e-04 (-0.0036,0.002)	1
PDE5A		-0.0008185			1.096 (0.9933,1.2099)	1		0.067 (-0.0976,0.2316)	1		0.0015 (-0.0013,0.0043)	1
PDGFB		0.0084786			1.11 (1.0142,1.2145)	1		0.2081 (0.0687,0.3475)	1		0.0043 (0.0019,0.0066)	1
PDGFC	0.0028878				1.022 (0.9346,1.1184)	1		0.3245 (0.1926,0.4565)	0.004272		0.003 (7e-04,0.0052)	1
PDGFRB		-0.0005171			1.101 (1.0059,1.2053)	1		0.0775 (-0.0588,0.2138)	1		5e-04 (-0.0018,0.0029)	1
PDIA2	0.0019162	0.0010526			0.9803 (0.8833,1.0881)	1		-0.086 (-0.2342,0.0623)	1		-7e-04 (-0.0032,0.0017)	1
PDIA3	0.0192012	0.0037695			1.154 (1.0722,1.2422)	0.395639		0.0776 (-0.0822,0.2375)	1		0.0022 (-5e-04,0.0049)	1
PDIA5		0.0032275			1.066 (0.9728,1.1683)	1		-0.0704 (-0.2307,0.0898)	1		0.0013 (-0.0014,0.0039)	1
PDLIM7	0.0019616				1.083 (0.9911,1.1826)	1		0.077 (-0.0609,0.2149)	1		0.0021 (-3e-04,0.0045)	1
PDP1	4.78e-05				0.9177 (0.8311,1.0132)	1		0.0283 (-0.0949,0.1516)	1		6e-04 (-0.0015,0.0027)	1
PDRG1	-0.0030862	-0.0042321			1.015 (0.9207,1.1189)	1		-0.0822 (-0.2488,0.0845)	1		9e-04 (-0.0019,0.0038)	1
PDXDC1	-0.0002545	0.000233			0.9462 (0.8429,1.0623)	1		0.1012 (-0.055,0.2574)	1		1e-04 (-0.0025,0.0027)	1
PDZK1	-0.00875				1.528 (1.4436,1.6165)	0		1.012 (0.831,1.1934)	6.63e-24		0.0138 (0.0107,0.0169)	1.41e-14
PEBP1		-0.0009579			1.118 (1.0215,1.2233)	1		0.2871 (0.1451,0.4292)	0.219413		0.0039 (0.0015,0.0063)	1
PECR		0.0087719			1.111 (1.0227,1.2063)	1		0.1461 (-0.0101,0.3024)	1		0.0019 (-9e-04,0.0046)	1
PENK	-0.0308953	-0.0534169	-1.23193		1.034 (0.9429,1.133)	1		0.3043 (0.1099,0.4986)	1		0.0042 (9e-04,0.0075)	1
PEPD	0.0377279	0.0557743			1.18 (1.0708,1.2997)	1		0.2662 (0.1017,0.4307)	1		-7e-04 (-0.0036,0.0021)	1
PER3	0.0036498	0.0056054			1.021 (0.9259,1.1268)	1		0.0168 (-0.1572,0.1909)	1		0.0016 (-0.0014,0.0046)	1
PFDN2	-0.0030496				0.9676 (0.8813,1.0622)	1		0.0519 (-0.079,0.1827)	1		9e-04 (-0.0013,0.0032)	1
PFDN4	0.0077228	0.005734			0.9844 (0.8895,1.0894)	1		0.1005 (-0.0568,0.2579)	1		3e-04 (-0.0025,0.0032)	1
PGA4	0.0015477				1.035 (0.945,1.1326)	1		-0.0612 (-0.2464,0.1239)	1		8e-04 (-0.0024,0.004)	1
PGD	-0.0151893	-0.0257036			1.098 (0.9986,1.2082)	1		0.1519 (-0.0161,0.3199)	1		0.0028 (-1e-04,0.0056)	1
PGF	0.0210942	0.0078574			1.313 (1.2227,1.4105)	2.25e-10		0.5785 (0.4067,0.7502)	1.32e-07		0.012 (0.0091,0.0149)	5.2e-12
PGLYRP1	0.0010758	0.0137017			1.124 (1.0325,1.2237)	1		0.1019 (-0.0439,0.2476)	1		0.0082 (0.0057,0.0107)	3.97e-07
PGLYRP4	0.0072922	0.0045122			0.9972 (0.9011,1.1036)	1		0.2742 (0.1071,0.4412)	1		0.0012 (-0.0016,0.004)	1
PGR	0.0004593				0.9919 (0.8936,1.101)	1		-0.0663 (-0.2298,0.0972)	1		4e-04 (-0.0024,0.0032)	1
PHACTR2	-0.0074909				1.064 (0.9651,1.1731)	1		0.1258 (-0.0401,0.2916)	1		8e-04 (-0.002,0.0037)	1
PHLDB2	0.0004005				0.984 (0.8912,1.0864)	1		0.2381 (0.0684,0.4079)	1		0.0016 (-0.0013,0.0045)	1
PHOSPHO1	0.0068589	0.0178856			1.293 (1.1927,1.402)	1.35e-06		0.1637 (0.0151,0.3124)	1		0.0036 (0.001,0.0062)	1
PHYKPL	0.0030633				1.51 (1.3795,1.6528)	1.17e-15		0.3846 (0.2169,0.5523)	0.0209975		0.0048 (0.0018,0.0077)	1
PI16	-0.0308353	-0.0443007			0.864 (0.7838,0.9525)	1		0.1448 (-0.029,0.3186)	1		-0.0018 (-0.0048,0.0012)	1
PI3		0.0044228			1.128 (1.0342,1.231)	1		0.0923 (-0.0605,0.2451)	1		0.0068 (0.0042,0.0095)	0.0011402
PIK3IP1	-0.0031113	-0.0160672			1.146 (1.0523,1.2485)	1		0.0874 (-0.0835,0.2582)	1		0.0053 (0.0024,0.0082)	1
PILRA	0.000935				1.366 (1.2432,1.5016)	2.69e-07		0.2019 (0.0526,0.3511)	1		0.0063 (0.0037,0.0088)	0.0045262
PKD1	0.0123605	0.0013711			1.127 (1.0147,1.2526)	1		-0.0238 (-0.2097,0.1621)	1		-0.0021 (-0.0053,0.0011)	1
PKLR	-0.0009125	-0.0010459			1.055 (0.9664,1.1515)	1		0.2269 (0.0889,0.3648)	1		0.0024 (1e-04,0.0048)	1
PKN3	0.0049177	0.0031126			1.008 (0.9152,1.1106)	1		-0.0024 (-0.163,0.1582)	1		0.0012 (-0.0016,0.0041)	1
PLA2G10	-0.0035831	-0.0021583	-1.06177		0.968 (0.8816,1.0628)	1		-0.5489 (-0.6967,-0.4012)	1.14e-09		-0.0063 (-0.0088,-0.0037)	0.0052596
PLA2G15	0.0071586				1.647 (1.5224,1.7816)	4.67e-32		0.7298 (0.583,0.8767)	9.89e-19		0.0141 (0.0115,0.0166)	1.17e-23
PLA2G1B	-0.0107838	-0.0031665			0.839 (0.7706,0.9133)	0.148555		-0.5582 (-0.7127,-0.4037)	4.8e-09		-0.0054 (-0.0081,-0.0028)	0.176723
PLA2G2A	-0.0013918	-0.0110359			1.078 (0.9899,1.1729)	1		0.021 (-0.1224,0.1645)	1		0.0039 (0.0014,0.0064)	1
PLA2G7	0.0431547	0.0512288	5.90622		1.133 (1.0264,1.251)	1		0.4033 (0.2443,0.5624)	0.0020182		0.0041 (0.0014,0.0069)	1
PLAT	-0.0084991				1.494 (1.3586,1.6427)	3.39e-13		1.102 (0.9423,1.2623)	0		0.013 (0.0102,0.0158)	1.7e-16
PLAU	-0.0085197	-0.0086524			1.222 (1.1674,1.2783)	1.62e-14		0.103 (-0.0481,0.2541)	1		0.0021 (-4e-04,0.0047)	1
PLAUR	-0.0540401	-0.0800029	-4.37404		1.376 (1.2576,1.5049)	9.71e-09		0.2494 (0.0831,0.4157)	1		0.0108 (0.008,0.0136)	3.49e-10
PLB1		0.0006077			0.9349 (0.8432,1.0365)	1		0.0026 (-0.169,0.1742)	1		-0.0012 (-0.0042,0.0017)	1
PLCB1	-0.0007183	-0.0005927			0.9594 (0.8625,1.0671)	1		-0.1174 (-0.2815,0.0467)	1		-0.0012 (-0.004,0.0017)	1
PLIN1	-0.0172007	-0.015715			1.272 (1.1917,1.3587)	1.73e-09		0.5804 (0.4406,0.7202)	1.55e-12		0.0081 (0.0056,0.0105)	3.99e-07
PLTP	0.0253921	0.0112786			0.9355 (0.8529,1.0262)	1		-0.5128 (-0.668,-0.3577)	2.95e-07		-0.0101 (-0.0128,-0.0075)	2.19e-10
PLXDC1	-0.0043034	-0.0056089			0.9372 (0.847,1.0371)	1		-0.0508 (-0.1811,0.0796)	1		-0.0018 (-0.0042,5e-04)	1
PLXDC2		-0.0079791			1.136 (1.0474,1.2314)	1		0.2217 (0.0567,0.3866)	1		0.0016 (-0.0013,0.0045)	1
PLXNA4	0.0062911	0.0048793			1.068 (0.976,1.1683)	1		0.1493 (0.0129,0.2856)	1		0.0023 (-1e-04,0.0046)	1
PLXNB2	-0.009474				1.304 (1.1969,1.4216)	4.1e-06		0.2524 (0.1013,0.4035)	1		0.004 (0.0014,0.0066)	1
PLXNB3	-0.0253714	-0.0288291			1.064 (0.974,1.1619)	1		0.0772 (-0.0603,0.2148)	1		0.0026 (3e-04,0.005)	1
PM20D1	0.0002342				1.007 (0.9201,1.1021)	1		0.1041 (-0.0333,0.2415)	1		-8e-04 (-0.0032,0.0015)	1
PMM2		-0.0016931			0.9749 (0.8832,1.0761)	1		0.0851 (-0.0853,0.2554)	1		0.0015 (-0.0014,0.0044)	1
PNLIP	0.0020452				1.055 (0.9632,1.1546)	1		0.1389 (-0.0276,0.3054)	1		0.0015 (-0.0013,0.0044)	1
PNLIPRP2	0.0004669	0.0002888			1.032 (0.9423,1.1308)	1		0.0109 (-0.1256,0.1475)	1		8e-04 (-0.0015,0.0031)	1
PNPT1	0.0075383	0.0044638			0.9725 (0.8844,1.0694)	1		-0.0495 (-0.1873,0.0882)	1		9e-04 (-0.0014,0.0033)	1
PODXL2	0.0287944	0.0115369			0.945 (0.8648,1.0326)	1		-0.2173 (-0.3642,-0.0705)	1		-0.0013 (-0.0039,0.0013)	1
POF1B	-0.0083036	-0.0103011			1.11 (1.0173,1.21)	1		0.0107 (-0.1639,0.1852)	1		0.0033 (3e-04,0.0062)	1
POLR2A	0.0012679	0.0028925			0.9761 (0.8814,1.0809)	1		-0.0882 (-0.254,0.0776)	1		-0.0018 (-0.0046,9e-04)	1
POLR2F		0.0031176			1.19 (1.1141,1.2706)	0.0006501		0.3234 (0.1678,0.479)	0.137042		0.0064 (0.0038,0.009)	0.0057213
POMC	0.0008663	0.0019914			1 (0.9035,1.1071)	1		0.1482 (-0.0285,0.3249)	1		-0.0014 (-0.0045,0.0018)	1
PON1	0.0115779	0.015782			0.9734 (0.8844,1.0713)	1		0.0957 (-0.0714,0.2628)	1		-0.0043 (-0.0071,-0.0014)	1
PON2	-0.001758	-0.0012779			1.331 (1.2217,1.4511)	2.04e-07		0.5067 (0.3647,0.6487)	9.04e-09		0.0073 (0.0049,0.0098)	1.43e-05
POSTN	0.0121595	0.0090221			0.9254 (0.8388,1.021)	1		-0.1678 (-0.3425,0.007)	1		-0.0014 (-0.0044,0.0016)	1
PPCDC	-0.0027333				1.159 (1.0614,1.2653)	1		0.1992 (0.0624,0.3361)	1		0.002 (-3e-04,0.0044)	1
PPIE	-0.0011141	-0.0051798			0.9923 (0.9007,1.0933)	1		0.1891 (0.0268,0.3514)	1		0.0017 (-0.0011,0.0045)	1
PPIF	-0.0080865	-0.0089654			1.06 (0.9686,1.1596)	1		0.1406 (-0.0338,0.3149)	1		3e-04 (-0.0027,0.0033)	1
PPM1A	-0.0069418	-0.0055663			0.985 (0.8979,1.0806)	1		-0.0446 (-0.1732,0.0841)	1		-0.0013 (-0.0035,9e-04)	1
PPME1	-0.0013489				1.022 (0.9333,1.1195)	1		0.1129 (-0.0235,0.2493)	1		0.0014 (-9e-04,0.0037)	1
PPP1R12B	-0.0020041	-0.006843			1.057 (0.9654,1.1579)	1		-0.0413 (-0.2026,0.1199)	1		-0.0014 (-0.0041,0.0014)	1
PPP1R14A	0.00298	0.0040635			1.113 (1.0145,1.2204)	1		0.1772 (0.0234,0.3309)	1		0.0034 (7e-04,0.0062)	1
PPP1R9B	0.0038201	0.005119			1.083 (0.9905,1.1838)	1		0.0605 (-0.0743,0.1954)	1		0.0022 (-1e-04,0.0046)	1
PPP2R5A	-0.0007609				1.003 (0.9102,1.1042)	1		0.0052 (-0.166,0.1764)	1		7e-04 (-0.0023,0.0036)	1
PPT1	0.0013935	0.0050108			0.952 (0.8565,1.0582)	1		-0.0399 (-0.2035,0.1237)	1		9e-04 (-0.002,0.0038)	1
PPY	0.0005015				1.015 (0.9276,1.1098)	1		0.1548 (0.0125,0.297)	1		0.0017 (-8e-04,0.0042)	1
PQBP1	-0.0022869	-0.0057643			1.107 (1.0242,1.1974)	1		0.0991 (-0.036,0.2342)	1		0.0031 (7e-04,0.0055)	1
PRAME		0.0070229			0.9196 (0.8311,1.0175)	1		0.0959 (-0.0631,0.2548)	1		-2e-04 (-0.0029,0.0026)	1
PRC1	-0.0036236	-0.002034			1.028 (0.9445,1.1192)	1		0.0329 (-0.1229,0.1886)	1		4e-04 (-0.0024,0.0031)	1
PRDX1	-0.0038297	-0.0034645			1.001 (0.9137,1.0965)	1		-0.0593 (-0.1863,0.0677)	1		-0.001 (-0.0032,0.0012)	1
PRELP		-0.0065548			1.124 (1.0223,1.2367)	1		-0.178 (-0.3334,-0.0227)	1		-0.003 (-0.0057,-3e-04)	1
PRG2	-0.0140479				1.074 (0.976,1.1826)	1		-0.236 (-0.4161,-0.056)	1		0.0056 (0.0025,0.0087)	1
PRKD2		-0.0112298			1.08 (0.9905,1.1775)	1		0.04 (-0.1265,0.2065)	1		0.0025 (-3e-04,0.0052)	1
PRKRA	0.0053654				1.144 (1.0468,1.2498)	1		0.166 (0.0283,0.3038)	1		0.0032 (8e-04,0.0056)	1
PRL		0.0005677			1.026 (0.9386,1.1224)	1		-0.2547 (-0.3968,-0.1126)	1		-8e-04 (-0.0033,0.0016)	1
PRND	0.0145164	0.0278194			1.036 (0.9416,1.1393)	1		0.1006 (-0.077,0.2782)	1		-0.0021 (-0.0052,9e-04)	1
PROC		-0.0103197			1.059 (0.9665,1.1604)	1		0.3916 (0.2515,0.5317)	0.0001316		0.0013 (-0.0012,0.0037)	1
PROCR		-0.0020665			0.9743 (0.8789,1.08)	1		-0.0989 (-0.2646,0.0669)	1		-0.0019 (-0.0047,8e-04)	1
PROK1	0.0165312	0.0222553	4.16581		1.009 (0.8901,1.1432)	1		-0.1488 (-0.3265,0.0289)	1		2e-04 (-0.0029,0.0033)	1
PROS1	0.0509135	0.0742936			1.204 (1.0971,1.3217)	0.268941		0.6823 (0.5067,0.858)	1.03e-10		5e-04 (-0.0026,0.0035)	1
PRR4	-0.0045935		-0.369556		0.9458 (0.8565,1.0445)	1		-0.1876 (-0.363,-0.0122)	1		-0.002 (-0.005,0.001)	1
PRR5		-0.0016433			1.056 (0.9629,1.1578)	1		-0.0129 (-0.1834,0.1575)	1		-5e-04 (-0.0034,0.0024)	1
PRRT3	-0.0198786	-0.0330789			0.9199 (0.8332,1.0157)	1		-0.376 (-0.5601,-0.1919)	0.185752		-0.0023 (-0.0055,0.001)	1
PRSS22	0.0140617	0.0139552			1.111 (1.022,1.2072)	1		0.2668 (0.0831,0.4504)	1		0.0044 (0.0013,0.0076)	1
PRSS27	0.0102653	0.0093569			1.029 (0.9417,1.1243)	1		-0.1345 (-0.2726,0.0035)	1		6e-04 (-0.0018,0.003)	1
PRSS53	-0.0220876	-0.032051			1.077 (0.9787,1.1858)	1		0.282 (0.1211,0.4429)	1		0.0015 (-0.0014,0.0043)	1
PRSS8	0.0064984	0.027629			1.487 (1.3489,1.6394)	4.4e-12		0.8236 (0.6451,1.0022)	6.71e-16		0.0099 (0.0068,0.0129)	1.12e-06
PRTG	0.0250962	0.0395607			1.19 (1.109,1.2761)	0.0036116		0.1191 (-0.0213,0.2595)	1		0.0044 (0.002,0.0068)	1
PRTN3	0.0051965	0.0242466			1.157 (1.0683,1.2522)	0.965137		0.212 (0.0649,0.3591)	1		0.0079 (0.0054,0.0104)	1.65e-06
PSAPL1	0.0040839	0.0050966			1.13 (1.0268,1.2441)	1		-0.05 (-0.2177,0.1177)	1		7e-04 (-0.0022,0.0036)	1
PSCA		-0.0015269			1.057 (0.957,1.1664)	1		-0.0488 (-0.2135,0.1159)	1		0.0027 (-1e-04,0.0055)	1
PSG1	-0.0039959	-0.0026642			1.048 (0.9527,1.1524)	1		-0.1976 (-0.3419,-0.0534)	1		-0.0015 (-0.004,9e-04)	1
PSMC3	-0.0047708	-0.016152			0.945 (0.8539,1.0459)	1		0.0391 (-0.1241,0.2023)	1		0.0028 (0,0.0055)	1
PSMD1	-0.002158	-0.0012699			1.055 (0.958,1.1629)	1		-0.0862 (-0.2561,0.0838)	1		-2e-04 (-0.003,0.0027)	1
PSMD5		-0.0037177			0.9768 (0.8811,1.083)	1		-0.1184 (-0.2849,0.0481)	1		4e-04 (-0.0024,0.0031)	1
PSPN			1.13432		1.163 (1.0294,1.3138)	1		0.3248 (0.1296,0.5199)	1		0.0066 (0.0033,0.01)	0.26409
PSRC1	-0.0033973	-0.0018838			1.121 (1.0321,1.2186)	1		0.1344 (-0.0068,0.2757)	1		0.0023 (-1e-04,0.0048)	1
PSTPIP2	0.0039223	0.0079213			1.084 (0.9804,1.199)	1		0.1026 (-0.0687,0.274)	1		0.0014 (-0.0014,0.0043)	1
PTGDS	-0.102836	-0.121665			1.169 (1.0754,1.2707)	0.719689		0.1237 (-0.0381,0.2856)	1		0.0066 (0.0038,0.0095)	0.0155947
PTGR1	0.0017385	0.0041257			1.547 (1.4124,1.6946)	1.73e-17		0.9821 (0.8064,1.1577)	5.74e-24		0.0059 (0.0029,0.0089)	0.409372
PTH	-0.0010023				1.101 (1.0017,1.2111)	1		0.2048 (0.0262,0.3833)	1		0.004 (9e-04,0.0071)	1
PTH1R	-0.0025267				1.082 (1.0045,1.1654)	1		0.1902 (0.0591,0.3213)	1		-6e-04 (-0.0029,0.0016)	1
PTN	-0.0138873	-0.018595			1.199 (1.0972,1.3106)	0.181193		0.0349 (-0.1172,0.187)	1		0.0015 (-0.0011,0.0041)	1
PTP4A3		0.0027659			1.341 (1.2545,1.4328)	1.51e-14		0.7829 (0.6124,0.9535)	1.17e-15		0.0095 (0.0065,0.0124)	9.93e-07
PTPN9	-0.0031815	-0.0089219			1.017 (0.922,1.1215)	1		-0.0293 (-0.1977,0.1391)	1		4e-04 (-0.0025,0.0032)	1
PTPRB	0.009326				1.144 (1.0351,1.2642)	1		0.3359 (0.1626,0.5092)	0.42895		0.0029 (-1e-04,0.006)	1
PTPRC	-0.0218466	-0.0280911			1.232 (1.1336,1.3386)	0.0025509		0.4239 (0.2564,0.5913)	0.0021462		0.007 (0.0041,0.0099)	0.0094877
PTPRF			1.14112		0.8586 (0.7839,0.9405)	1		-0.227 (-0.3729,-0.0812)	1		-0.0032 (-0.0057,-7e-04)	1
PTPRH	-0.000692				1.289 (1.182,1.4066)	3e-05		0.2321 (0.0612,0.4029)	1		5e-04 (-0.0025,0.0034)	1
PTPRR	0.0177797	0.006023			0.953 (0.8661,1.0485)	1		-0.16 (-0.3312,0.0113)	1		-0.0023 (-0.0052,7e-04)	1
PTPRZ1	-0.0734438	-0.0733678	-8.68478		0.977 (0.8775,1.0878)	1		-0.0979 (-0.2816,0.0857)	1		-0.0022 (-0.0053,0.001)	1
PTTG1	0.0011479	0.0013682			1.064 (0.9734,1.1638)	1		0.1028 (-0.0682,0.2738)	1		0.003 (1e-04,0.006)	1
PTX3		0.0019497			1.131 (1.0252,1.2478)	1		-0.1576 (-0.2964,-0.0188)	1		-0.001 (-0.0034,0.0015)	1
PVALB	1.72e-05	0.0003059			1.02 (0.9322,1.1156)	1		-0.07 (-0.207,0.067)	1		5e-04 (-0.0018,0.0029)	1
PVR	0.0049879	0.0069614			1.391 (1.2891,1.5015)	6.24e-14		0.4365 (0.293,0.58)	7.83e-06		0.0033 (8e-04,0.0058)	1
PXN	-0.0014349				1.08 (0.9879,1.1802)	1		0.2264 (0.0846,0.3682)	1		0.0031 (6e-04,0.0055)	1
PYDC1	0.0114618	0.0235808			0.9576 (0.8635,1.0621)	1		-0.0174 (-0.1757,0.1408)	1		0.0015 (-0.0013,0.0044)	1
PYY	0.0015574				1.172 (1.0675,1.2868)	1		0.2321 (0.0588,0.4053)	1		0.005 (0.002,0.008)	1
PZP	-0.0094384	-0.0087759	-1.25008		0.924 (0.8054,1.0601)	1		0.0892 (-0.1343,0.3127)	1		0.0015 (-0.0023,0.0053)	1
QPCT	0.0488724	0.0649623			1.19 (1.088,1.3005)	0.402652		0.0044 (-0.1416,0.1505)	1		0.006 (0.0035,0.0085)	0.0078806
RAB33A	0.0007582				1.058 (0.9613,1.1644)	1		0.0942 (-0.0752,0.2636)	1		8e-04 (-0.0021,0.0037)	1
RAB39B		0.0018545			1.053 (0.9638,1.1508)	1		0.0866 (-0.0671,0.2402)	1		0.0025 (0,0.0051)	1
RAB3GAP1	0.0002401	0.0003686			0.9957 (0.9,1.1015)	1		-0.0811 (-0.2305,0.0682)	1		2e-04 (-0.0024,0.0028)	1
RAB6A	0.0033613	0.0099988			0.9969 (0.9092,1.0929)	1		-0.0334 (-0.1828,0.1161)	1		-0.0022 (-0.0047,4e-04)	1
RAB6B	-0.0030336	-0.002667			0.9761 (0.8892,1.0715)	1		-0.0218 (-0.1568,0.1131)	1		0.0014 (-9e-04,0.0038)	1
RABEPK	0.0021889	0.01002			1.026 (0.9391,1.1218)	1		-0.0172 (-0.1543,0.1199)	1		0.0016 (-8e-04,0.004)	1
RAC3	-0.000524	-0.0008193			1.062 (0.9716,1.1618)	1		0.03 (-0.1374,0.1974)	1		0.0015 (-0.0015,0.0044)	1
RAD51	0.0026854	0.0049718			1.062 (0.9746,1.1572)	1		0.0806 (-0.0941,0.2552)	1		5e-04 (-0.0023,0.0034)	1
RALB	0.0060095				1.002 (0.9061,1.1074)	1		0.0725 (-0.0852,0.2302)	1		-1e-04 (-0.0029,0.0026)	1
RANGAP1	0.0054361	0.0046411			0.9451 (0.8564,1.043)	1		-0.0113 (-0.1354,0.1128)	1		0.0014 (-8e-04,0.0035)	1
RAP1A	0.0066434	0.0049755			0.9931 (0.8968,1.0996)	1		-0.1786 (-0.3471,-0.0101)	1		-0.0012 (-0.0041,0.0017)	1
RARRES2	-0.015952	-0.0214229			1.296 (1.1975,1.4026)	3.72e-07		0.7537 (0.5966,0.9109)	2.5e-17		0.0112 (0.0085,0.0139)	2.23e-12
RASA1	0.0002852				1.095 (1.0048,1.1929)	1		0.0183 (-0.1177,0.1542)	1		0.0019 (-4e-04,0.0043)	1
RBM19	0.0147584	0.013137			1.045 (0.9511,1.1483)	1		0.0351 (-0.1242,0.1944)	1		0.0014 (-0.0013,0.0041)	1
RBM25	-0.0051255	-0.0062261			0.9704 (0.8773,1.0733)	1		0.037 (-0.121,0.1949)	1		0.0022 (-5e-04,0.0049)	1
RBP7	0.0179109	0.0242972			1.107 (1.0114,1.2125)	1		0.3128 (0.1368,0.4888)	1		0.005 (0.002,0.0079)	1
RBPMS	-0.0050309				1.048 (0.954,1.1508)	1		0.0455 (-0.11,0.2011)	1		0.0019 (-8e-04,0.0045)	1
REG1A	0.0003301				1.087 (0.9991,1.1817)	1		-0.1727 (-0.3199,-0.0254)	1		0.0019 (-7e-04,0.0045)	1
REG3A			-1.55558		1.043 (0.9541,1.1409)	1		-0.316 (-0.4664,-0.1655)	0.114309		0.0019 (-7e-04,0.0045)	1
REG4	0.0051023	0.0094184			1.103 (1.009,1.2053)	1		-0.1055 (-0.2624,0.0513)	1		0.0016 (-0.001,0.0043)	1
RELB	0.0050096	0.0012167			0.9905 (0.8962,1.0947)	1		-0.0935 (-0.2573,0.0704)	1		-5e-04 (-0.0033,0.0024)	1
RELT	0.0374546	0.0547268			1.275 (1.1672,1.3932)	0.0002125		0.2915 (0.1169,0.4661)	1		0.0083 (0.0053,0.0113)	0.000173
REN		0.0057533			1.107 (1.0164,1.2047)	1		0.3453 (0.169,0.5216)	0.364081		0.0023 (-8e-04,0.0053)	1
REST	0.0050661	0.0015457			1.073 (0.9769,1.1793)	1		0.1172 (-0.0538,0.2882)	1		6e-04 (-0.0024,0.0035)	1
RET	0.0050657				1.406 (1.2816,1.5433)	1.81e-09		0.7627 (0.6152,0.9102)	2.1e-20		0.0082 (0.0057,0.0108)	1.32e-06
RETN	0.0110956	0.0274235			1.188 (1.0939,1.2909)	0.129123		0.1051 (-0.048,0.2582)	1		0.0089 (0.0063,0.0115)	1.04e-07
RFC4	0.0152671	0.0147906			1.071 (0.9787,1.1722)	1		0.0928 (-0.0753,0.2609)	1		0.0025 (-4e-04,0.0053)	1
RGMA	0.0035713				0.937 (0.8568,1.0246)	1		-0.2297 (-0.3734,-0.086)	1		-0.0022 (-0.0047,2e-04)	1
RGMB	-0.0159974	-0.0241945			1.029 (0.9421,1.1235)	1		-0.0727 (-0.2256,0.0802)	1		9e-04 (-0.0017,0.0036)	1
RGS8	-0.0038941	-0.0057248			1.006 (0.9191,1.1015)	1		0.1244 (-0.0162,0.265)	1		0.0013 (-0.0011,0.0036)	1
RICTOR		-0.0012564			0.9875 (0.8914,1.0941)	1		-0.0706 (-0.2297,0.0885)	1		-4e-04 (-0.003,0.0022)	1
RLN2	-0.0010149	-0.0023621			0.9832 (0.8781,1.101)	1		-0.0791 (-0.2322,0.074)	1		1e-04 (-0.0025,0.0028)	1
RNASE1	0.0039915				1.209 (1.1174,1.3077)	0.0067235		0.586 (0.3912,0.7808)	1.2e-05		0.0097 (0.0063,0.013)	7.27e-05
RNASE10	-0.0003487	-0.009535			1.056 (0.9632,1.158)	1		0.145 (-0.0169,0.3068)	1		0.0035 (7e-04,0.0062)	1
RNASE3		-0.0007158			1.125 (1.0348,1.2224)	1		0.1691 (0.0278,0.3104)	1		0.0058 (0.0034,0.0082)	0.0074423
RNASET2	-0.0109996				1.212 (1.1146,1.3172)	0.0192531		0.1435 (-0.0118,0.2988)	1		0.0082 (0.0056,0.0109)	4.26e-06
RNF149	0.0346051	0.0486497			1.336 (1.2223,1.4607)	5.3e-07		0.0831 (-0.0942,0.2605)	1		0.005 (0.0019,0.008)	1
RNF31	0.0074499	0.008043			0.9404 (0.8433,1.0486)	1		0.089 (-0.0727,0.2508)	1		9e-04 (-0.0018,0.0036)	1
RNF43	-0.0033459	-0.0082541			1.072 (0.9837,1.1677)	1		0.2072 (0.0514,0.363)	1		0.0021 (-5e-04,0.0047)	1
ROBO1	0.0414892	0.0539177			1.437 (1.3348,1.5469)	1.6e-18		0.3372 (0.1893,0.4852)	0.0236419		0.0082 (0.0057,0.0107)	5.91e-07
ROBO2	0.0150627				1.14 (1.0402,1.2503)	1		0.1943 (0.0424,0.3461)	1		0.0015 (-0.0012,0.0041)	1
RP2	0.004137	0.0025268			1.108 (1.0189,1.204)	1		0.0235 (-0.1166,0.1637)	1		0.0027 (3e-04,0.0051)	1
RPGR	-0.0002844	-0.004012			1.032 (0.9413,1.1313)	1		-0.0417 (-0.1955,0.1121)	1		2e-04 (-0.0025,0.003)	1
RPS10		-0.0046294			0.8984 (0.8029,1.0054)	1		0.0186 (-0.1443,0.1814)	1		-3e-04 (-0.0032,0.0025)	1
RRM2	0.0017455				1.242 (1.1764,1.3122)	1.95e-11		0.3058 (0.1624,0.4493)	0.0869295		0.0047 (0.0022,0.0073)	0.855854
RRP15		-0.0020758			1.004 (0.9083,1.1093)	1		-0.1381 (-0.3004,0.0242)	1		-0.0022 (-0.0051,7e-04)	1
RSPO3	0.0344143	0.051925			0.9805 (0.8927,1.077)	1		-0.1218 (-0.2761,0.0325)	1		0.0022 (-5e-04,0.0049)	1
RTBDN	-0.0001224	-0.0071282			0.9974 (0.9116,1.0912)	1		-0.1527 (-0.2955,-0.0099)	1		-0.0029 (-0.0054,-4e-04)	1
RTKN2	0.0006615	0.0038079			1.012 (0.9204,1.1118)	1		-0.0822 (-0.2429,0.0786)	1		-3e-04 (-0.003,0.0025)	1
RTN4R	-0.0013907				1.351 (1.2606,1.447)	3.77e-14		0.5892 (0.4354,0.743)	2.1e-10		0.0099 (0.0073,0.0125)	6.56e-10
RUVBL1	0.0008605	0.0014342			1.03 (0.9426,1.1259)	1		0.0454 (-0.0903,0.181)	1		0.0018 (-6e-04,0.0041)	1
S100A16	-0.0018926	-0.0002784			1.128 (1.0372,1.2265)	1		0.1105 (-0.0221,0.243)	1		-2e-04 (-0.0024,0.002)	1
S100G	0.0097523	0.0149118			1.047 (0.955,1.1479)	1		0.0528 (-0.1151,0.2207)	1		0.0022 (-7e-04,0.0052)	1
S100P		-0.0009144			1.108 (1.0197,1.2032)	1		0.0507 (-0.1024,0.2038)	1		0.0029 (3e-04,0.0056)	1
SAFB2		-0.0086044			1.012 (0.9159,1.1172)	1		-0.0037 (-0.1577,0.1503)	1		7e-04 (-0.002,0.0034)	1
SAG	-0.0068013	-0.0034396			0.9805 (0.8847,1.0866)	1		-0.1674 (-0.3083,-0.0264)	1		-0.001 (-0.0034,0.0015)	1
SAP18	-0.0034387	-0.0030945			1.005 (0.9133,1.1069)	1		0.0358 (-0.136,0.2077)	1		0.0019 (-0.001,0.0048)	1
SARG	0.0026392				1.08 (0.9792,1.1903)	1		0.1887 (0.0239,0.3536)	1		0.0017 (-0.0011,0.0045)	1
SAT2	0.0081884	0.0095719			1.168 (1.0842,1.2577)	0.123834		0.1786 (0.0131,0.344)	1		0.0037 (9e-04,0.0066)	1
SBSN	-0.0045039	-0.0091778			1.036 (0.9442,1.1357)	1		-0.052 (-0.2245,0.1206)	1		0.0021 (-9e-04,0.0051)	1
SCARA5	0.028134	0.0334999			1.136 (1.0367,1.2458)	1		0.4154 (0.2596,0.5711)	0.0005204		0.0055 (0.0028,0.0082)	0.170002
SCARB2	-0.0012449				1.348 (1.2518,1.4514)	7.49e-12		0.5917 (0.4187,0.7647)	6.73e-08		0.0111 (0.008,0.0141)	4.63e-09
SCARF1		-0.0215978			1.171 (1.0744,1.2771)	0.974487		0.0914 (-0.0493,0.2321)	1		0.0039 (0.0015,0.0063)	1
SCARF2	-0.0045758				1.172 (1.0601,1.296)	1		-0.354 (-0.5275,-0.1805)	0.187972		-0.0018 (-0.0048,0.0012)	1
SCGB1A1	0.0869931	0.0583004	4.8949		1.007 (0.9193,1.1032)	1		-0.1125 (-0.2666,0.0415)	1		-4e-04 (-0.003,0.0023)	1
SCGB2A2	0.0027625				0.9956 (0.9007,1.1006)	1		-0.0651 (-0.2362,0.106)	1		-0.0012 (-0.004,0.0017)	1
SCGB3A2	0.0216057	0.0296496			0.8416 (0.7615,0.9301)	1		-0.595 (-0.7477,-0.4422)	8.2e-11		-0.0077 (-0.0102,-0.0051)	1.16e-05
SCGN	-0.0031943	-0.0063323			0.9153 (0.8341,1.0044)	1		-0.1986 (-0.3401,-0.057)	1		-0.0023 (-0.0048,1e-04)	1
SCN2A		0.0017677			1.051 (0.9574,1.1531)	1		-0.0698 (-0.2299,0.0902)	1		0.0011 (-0.0018,0.004)	1
SCN3A	0.0046821	0.0021664			0.956 (0.8625,1.0595)	1		-0.0193 (-0.177,0.1384)	1		0.001 (-0.0017,0.0036)	1
SCN3B		-0.0002004			0.9691 (0.8742,1.0743)	1		-0.0537 (-0.2023,0.0949)	1		9e-04 (-0.0016,0.0035)	1
SCN4B		-0.0033501			1.002 (0.9083,1.1056)	1		0.1874 (0.0091,0.3657)	1		0.0022 (-9e-04,0.0053)	1
SCRIB		-0.000121			1.188 (1.0926,1.2921)	0.162697		0.1131 (-0.0458,0.2721)	1		0.0036 (8e-04,0.0063)	1
SCRN1	-0.0049665	-8.31e-05			1.091 (0.9999,1.1911)	1		0.0199 (-0.1167,0.1566)	1		0.0016 (-8e-04,0.004)	1
SDC1	0.0116181	0.012535			1.296 (1.1993,1.4006)	1.69e-07		0.2498 (0.102,0.3976)	1		0.0099 (0.0074,0.0125)	6.84e-11
SEL1L		0.0109467			1.14 (1.0726,1.2127)	0.0790109		0.2166 (0.04,0.3933)	1		0.006 (0.003,0.0089)	0.186424
SELL	0.0084783	0.0129789			1.049 (0.947,1.161)	1		0.0499 (-0.1247,0.2245)	1		0.0027 (-3e-04,0.0057)	1
SELPLG	-0.0033441				1.259 (1.1523,1.3757)	0.0010116		0.687 (0.5309,0.8432)	2.61e-14		0.0061 (0.0033,0.0088)	0.0432748
SEMA3F	0.0280449	0.0396122			1.37 (1.2535,1.4969)	1.06e-08		0.5317 (0.3772,0.6862)	5.08e-08		0.0093 (0.0066,0.0119)	2.63e-08
SEMA4C	-0.0128065	-0.0168387			1.038 (0.954,1.1289)	1		-0.1264 (-0.2623,0.0095)	1		-0.0011 (-0.0035,0.0013)	1
SEMA6C	0.0048195	0.010916			1.031 (0.9365,1.1345)	1		0.0513 (-0.1149,0.2175)	1		2e-04 (-0.0026,0.003)	1
SEPTIN3		7.29e-05			1.051 (0.9536,1.1575)	1		-0.0445 (-0.2104,0.1215)	1		0.0012 (-0.0016,0.004)	1
SEPTIN9		-0.0009178			1.095 (1.0098,1.1885)	1		-0.0366 (-0.1672,0.094)	1		0.0012 (-0.0011,0.0035)	1
SERPINA1		-0.0176855			1.054 (0.9608,1.1553)	1		0.0203 (-0.1479,0.1886)	1		0.004 (0.0011,0.0069)	1
SERPINA11	-0.011525	-0.0216558	-4.69175		1.024 (0.9269,1.1304)	1		-0.1518 (-0.3078,0.0042)	1		0.0045 (0.0018,0.0071)	1
SERPINA12	-0.0063892	-0.0093292	-0.259701		1.047 (0.9606,1.142)	1		0.2091 (0.0695,0.3487)	1		0.0017 (-6e-04,0.0041)	1
SERPINA4	0.0036196				1.18 (1.0707,1.3006)	1		0.5844 (0.4123,0.7566)	9.78e-08		0.0021 (-9e-04,0.0051)	1
SERPINA6	-0.0024835	-0.0160614			1.133 (1.0181,1.2607)	1		-0.0692 (-0.256,0.1176)	1		-0.0041 (-0.0073,-9e-04)	1
SERPINA7	0.0363729				1.193 (1.0816,1.3161)	1		0.1704 (-0.0079,0.3487)	1		0.0073 (0.0042,0.0103)	0.0080355
SERPINA9	-0.0054877	-0.0117321			1.284 (1.1804,1.3957)	1.54e-05		0.328 (0.184,0.4721)	0.0240714		0.0034 (9e-04,0.0059)	1
SERPINB5	0.0045377	0.0047225			1.017 (0.9295,1.1122)	1		-0.0674 (-0.2044,0.0697)	1		-0.0014 (-0.0037,0.001)	1
SERPINB8	0.0105663	0.006444			1.191 (1.1094,1.2784)	0.0040002		0.2685 (0.1208,0.4162)	1		0.0049 (0.0024,0.0075)	0.400314
SERPINC1	0.028881				0.8784 (0.797,0.968)	1		-0.1029 (-0.2733,0.0676)	1		-0.005 (-0.0079,-0.002)	1
SERPINE2	0.0158802	0.0285989			1.069 (0.9725,1.1745)	1		0.2184 (0.0526,0.3842)	1		0.004 (0.0012,0.0068)	1
SERPINF1	-0.0090359	-0.0181965			1.382 (1.2627,1.5129)	6.64e-09		1.084 (0.899,1.2691)	1.97e-26		0.0113 (0.0081,0.0145)	1.36e-08
SERPING1	-0.0297423				1.055 (0.9548,1.1655)	1		0.1952 (0.0251,0.3652)	1		-0.0018 (-0.0047,0.0012)	1
SERPINI1	0.0105545	0.0326191			1.087 (0.9898,1.1946)	1		0.0156 (-0.1607,0.192)	1		9e-04 (-0.0021,0.004)	1
SERPINI2	-0.0051177	-0.0067067			1.11 (1.0126,1.2176)	1		0.2895 (0.1252,0.4538)	1		0.0031 (2e-04,0.0059)	1
SETMAR	0.0081678	0.010784			1.313 (1.216,1.4177)	1.03e-08		0.4938 (0.3423,0.6452)	5.39e-07		0.0057 (0.0031,0.0084)	0.0716474
SEZ6	-0.0047895	-0.009609			0.9962 (0.901,1.1014)	1		-0.2642 (-0.4431,-0.0853)	1		-0.0028 (-0.0059,2e-04)	1
SEZ6L	-0.130905	-0.161483			0.9743 (0.8869,1.0703)	1		-0.2942 (-0.4452,-0.1432)	0.39447		-0.0034 (-0.006,-8e-04)	1
SEZ6L2	-0.0172673	-0.0484588	-1.69625		1.112 (1.0099,1.2246)	1		-0.2455 (-0.3983,-0.0928)	1		-0.0012 (-0.0039,0.0014)	1
SF3B4	-0.0006805	-0.0027312			0.9811 (0.8969,1.0733)	1		0.0606 (-0.0771,0.1984)	1		0.0021 (-2e-04,0.0045)	1
SFRP1	0.000178				1.158 (1.062,1.2619)	1		0.3226 (0.1686,0.4765)	0.119364		0.0037 (0.001,0.0064)	1
SFRP4	-0.004746	-0.0101126			1.174 (1.0643,1.2956)	1		0.5673 (0.392,0.7427)	7.59e-07		0.008 (0.005,0.011)	0.0007054
SFTPA1	-0.0048815	-0.0021498			0.9965 (0.9089,1.0925)	1		-0.0734 (-0.2041,0.0573)	1		1e-04 (-0.0022,0.0024)	1
SFTPA2	0.0055418				0.9561 (0.8711,1.0494)	1		-0.0838 (-0.2291,0.0615)	1		-0.002 (-0.0045,6e-04)	1
SFTPD	-0.0116996	-0.0059604			0.9762 (0.8902,1.0705)	1		0.0218 (-0.1211,0.1646)	1		-4e-04 (-0.0028,0.0021)	1
SH3BP1	-0.0013727	-0.0072102			1.014 (0.9219,1.1149)	1		0.0207 (-0.1354,0.1768)	1		0.0022 (-5e-04,0.0049)	1
SHD	-0.0019877				1.08 (0.993,1.1752)	1		0.0618 (-0.107,0.2306)	1		-5e-04 (-0.0034,0.0025)	1
SHH	0.0009881	0.0037285			0.9854 (0.8904,1.0907)	1		-0.1553 (-0.3114,9e-04)	1		-0.0023 (-0.0049,3e-04)	1
SIAE	0.0049183				1.27 (1.1645,1.3855)	0.0002014		0.2827 (0.1433,0.422)	0.207111		0.0061 (0.0037,0.0085)	0.0018149
SIGLEC15	0.0009939				0.9997 (0.9121,1.0958)	1		0.0162 (-0.1204,0.1528)	1		0.0019 (-4e-04,0.0042)	1
SIGLEC6	-0.0134245	-0.0204061			1.144 (1.0475,1.2497)	1		0.0841 (-0.0562,0.2245)	1		0.004 (0.0016,0.0064)	1
SIGLEC8	-0.0144815	-0.010955			1.504 (1.3683,1.6528)	7.26e-14		0.5797 (0.4052,0.7541)	2.52e-07		0.0091 (0.006,0.0121)	2.1e-05
SIL1	-0.007413				1.129 (1.0508,1.212)	1		0.1156 (-0.0522,0.2834)	1		0.0022 (-7e-04,0.0051)	1
SIRPB1	0.0054561	0.0037314			1.256 (1.1488,1.3724)	0.001539		0.051 (-0.1002,0.2021)	1		0.0049 (0.0023,0.0075)	0.549628
SIT1	-0.0042353				1.044 (0.9486,1.1482)	1		0.3576 (0.2062,0.5091)	0.0110101		0.0055 (0.0029,0.0081)	0.0850302
SKAP1	0.006758	0.0146161			1.03 (0.9386,1.1301)	1		0.2797 (0.1348,0.4246)	0.45554		0.0036 (0.0011,0.0061)	1
SKAP2		0.0018568			1.075 (0.9834,1.1757)	1		0.1581 (0.021,0.2951)	1		0.0031 (7e-04,0.0054)	1
SKIV2L	-0.001215				1.052 (0.9611,1.1512)	1		-0.0255 (-0.1994,0.1484)	1		0.0016 (-0.0015,0.0046)	1
SLAMF1	-0.0020057	-0.0013264			1.227 (1.1188,1.3462)	0.0421645		0.0576 (-0.0761,0.1912)	1		0.0032 (9e-04,0.0055)	1
SLAMF6	0.0012937				1.21 (1.1107,1.3176)	0.0362036		0.0304 (-0.1009,0.1617)	1		0.0019 (-4e-04,0.0041)	1
SLAMF7	0.0061913	0.0032695			1.107 (1.0141,1.2093)	1		0.0191 (-0.1196,0.1577)	1		0.0031 (7e-04,0.0055)	1
SLAMF8		0.0043559			1.553 (1.4226,1.6962)	2.81e-19		0.3115 (0.1682,0.4549)	0.0608945		0.0075 (0.005,0.0101)	2.38e-05
SLC13A1	-0.0022334	-0.0011916			1.026 (0.933,1.1284)	1		0.1158 (-0.0315,0.263)	1		0.0024 (0,0.0049)	1
SLC28A1	-0.0055107				1.061 (0.967,1.1637)	1		0.1106 (-0.058,0.2793)	1		0.0031 (2e-04,0.0059)	1
SLC39A5	-0.0009859				1.184 (1.0966,1.2792)	0.0485636		0.4399 (0.2947,0.585)	8.92e-06		0.0039 (0.0015,0.0064)	1
SLC44A4		0.0040513			1.058 (0.9644,1.1599)	1		0.0031 (-0.1689,0.175)	1		0.001 (-0.0019,0.0039)	1
SLC9A3R2		0.0025771			1.1 (1.0157,1.1908)	1		0.1102 (-0.0611,0.2816)	1		0.0021 (-8e-04,0.0049)	1
SLIRP		0.0029339			0.888 (0.7935,0.9937)	1		-0.0388 (-0.1983,0.1206)	1		0.0013 (-0.0015,0.0041)	1
SLITRK1	-0.087407	-0.111293	-2.68289		0.8583 (0.7723,0.9539)	1		-0.2941 (-0.4869,-0.1012)	1		-0.0038 (-0.0071,-5e-04)	1
SLITRK2	-0.0143204	-0.039522			1.231 (1.1225,1.3499)	0.0294245		0.2177 (0.0726,0.3628)	1		0.0062 (0.0037,0.0087)	0.0042048
SLITRK6	0.0064939	0.0051991			0.975 (0.8913,1.0666)	1		-0.3737 (-0.5175,-0.23)	0.0010472		8e-04 (-0.0017,0.0033)	1
SLK	-0.0026581	-0.0014511			1.064 (0.9731,1.1636)	1		0.0453 (-0.1215,0.2121)	1		9e-04 (-0.002,0.0039)	1
SMAD1	-0.000996	-0.0004738			1.11 (1.0162,1.2119)	1		0.182 (0.0412,0.3228)	1		0.0028 (4e-04,0.0053)	1
SMAD2	0.0043173	0.004521			1.048 (0.9538,1.1511)	1		0.1686 (-0.002,0.3392)	1		0.0013 (-0.0017,0.0042)	1
SMAD5	-0.0301856	-0.0402594			1.114 (1.0109,1.228)	1		0.3711 (0.234,0.5083)	0.0003445		0.0039 (0.0015,0.0063)	1
SMARCA2		0.0007426			1.095 (1.0047,1.193)	1		0.0214 (-0.1045,0.1472)	1		0.0024 (2e-04,0.0045)	1
SMC3	0.0002202	0.0037638			1.006 (0.912,1.1105)	1		0.1059 (-0.0681,0.2798)	1		0 (-0.003,0.0029)	1
SMOC1	0.0062051	0.0185493			1.367 (1.2526,1.4913)	6.39e-09		0.3366 (0.1817,0.4915)	0.061099		0.0081 (0.0054,0.0107)	9.69e-06
SMOC2	0.008144				1.193 (1.0898,1.3061)	0.387165		0.3376 (0.1798,0.4955)	0.0817868		0.0045 (0.0018,0.0072)	1
SMPDL3A	0.0067595	0.0046449			1.159 (1.0558,1.2728)	1		0.4913 (0.3523,0.6302)	1.4e-08		0.0049 (0.0025,0.0072)	0.213627
SMPDL3B	-0.0007054	0.0001601			1.005 (0.9141,1.1058)	1		-0.064 (-0.2254,0.0974)	1		4e-04 (-0.0023,0.0032)	1
SNAP25	-0.0146021	-0.0151569			1.038 (0.9418,1.1443)	1		-0.0591 (-0.2305,0.1123)	1		-0.001 (-0.004,0.002)	1
SNCG	-0.0082905	-0.0147759			1.286 (1.1689,1.4153)	0.0007285		0.422 (0.2701,0.574)	0.0001602		0.0061 (0.0035,0.0087)	0.0146626
SNED1		-0.0009008			1.152 (1.0623,1.2497)	1		0.0462 (-0.1232,0.2157)	1		-0.0011 (-0.004,0.0018)	1
SNX15		0.0012671			1.122 (1.019,1.2351)	1		0.2666 (0.0973,0.4359)	1		0.0026 (-3e-04,0.0055)	1
SNX18	-0.0061709	-0.0029754			1.003 (0.9094,1.1062)	1		-0.0208 (-0.1884,0.1468)	1		4e-04 (-0.0025,0.0033)	1
SNX2		-0.0003688			1.023 (0.9299,1.1265)	1		0.0209 (-0.1392,0.1809)	1		7e-04 (-0.002,0.0035)	1
SOD2	0.0009958	0.0133884			1.374 (1.2858,1.4684)	1.83e-17		0.028 (-0.1223,0.1782)	1		1e-04 (-0.0025,0.0027)	1
SOD3	-0.0079072	-0.0093747			0.9633 (0.8673,1.07)	1		-0.2204 (-0.382,-0.0588)	1		2e-04 (-0.0025,0.003)	1
SORCS2	-0.01072				1.099 (1.0025,1.2045)	1		0.2071 (0.0541,0.3601)	1		0.0047 (0.002,0.0074)	1
SORD	0.0192541	0.0216892			1.704 (1.556,1.8656)	3.37e-27		1.116 (0.9696,1.2618)	0		0.0121 (0.0095,0.0146)	2.74e-16
SORT1	0.0070587				1.306 (1.2013,1.4203)	1.16e-06		0.3837 (0.2413,0.5261)	0.000391		0.0051 (0.0026,0.0075)	0.14572
SOST	0.0359145	0.0536197	1.62042		1.171 (1.0642,1.2889)	1		0.2762 (0.1287,0.4238)	0.714429		0.0032 (7e-04,0.0057)	1
SOX9	0.0093232	0.0145018			1.231 (1.1196,1.353)	0.0501707		-0.0185 (-0.1877,0.1507)	1		-1e-04 (-0.003,0.0028)	1
SPAG1	0.0116766	0.0186878			1.103 (1.0105,1.2034)	1		0.0133 (-0.1547,0.1813)	1		0.0019 (-0.001,0.0048)	1
SPARCL1	-0.0034751	-0.0043231			0.9144 (0.8331,1.0037)	1		-0.1718 (-0.3183,-0.0254)	1		9e-04 (-0.0016,0.0034)	1
SPESP1	0.023373	0.0299232	3.03757		1.016 (0.9157,1.1268)	1		0.0838 (-0.0936,0.2611)	1		0 (-0.0031,0.003)	1
SPINK2	0.0193145	0.038194			0.969 (0.8706,1.0785)	1		-0.0422 (-0.2336,0.1492)	1		0.0033 (0,0.0065)	1
SPINK4		-0.0012282			1.116 (1.0228,1.2174)	1		-0.0169 (-0.1647,0.1309)	1		0.0024 (-2e-04,0.0049)	1
SPINK5	0.0111285	0.005865			1.001 (0.9143,1.0949)	1		-0.1093 (-0.2547,0.0361)	1		6e-04 (-0.0018,0.0031)	1
SPINK6	-0.0114796	-0.0127672			1.163 (1.0561,1.2805)	1		0.1928 (0.0482,0.3373)	1		0.0014 (-0.001,0.0039)	1
SPINK8		-0.0018832			1.046 (0.9587,1.1416)	1		0.1272 (-0.0259,0.2802)	1		-1e-04 (-0.0027,0.0025)	1
SPINT1	0.0503891	0.0535293			1.428 (1.3339,1.5279)	2.66e-21		0.1022 (-0.0465,0.2509)	1		0.0032 (6e-04,0.0057)	1
SPINT3	-0.0046897	-0.0062879			0.7764 (0.6493,0.9285)	1		-0.0748 (-0.3912,0.2416)	1		-0.0025 (-0.0079,0.0029)	1
SPOCK1	-0.0423035	-0.0438054			1.116 (1.0207,1.2212)	1		0.1952 (0.0503,0.3401)	1		-0.0024 (-0.0049,1e-04)	1
SPON2	-0.0104119	-0.003548			1.397 (1.2839,1.519)	2.04e-11		0.197 (0.0414,0.3526)	1		0.0091 (0.0064,0.0117)	9.96e-08
SPP1		0.0083821			1.156 (1.0574,1.2641)	1		-0.0746 (-0.2298,0.0806)	1		0.0011 (-0.0016,0.0038)	1
SPRED2	0.0091363	0.0228116			0.9443 (0.8497,1.0493)	1		-0.0651 (-0.2316,0.1013)	1		-7e-04 (-0.0035,0.0021)	1
SPRING1		-0.0020626			0.9267 (0.8271,1.0382)	1		-0.0649 (-0.217,0.0872)	1		0.0024 (-2e-04,0.0049)	1
SPRR3	-0.0022901	-0.0127341			0.9622 (0.8667,1.0682)	1		0.0347 (-0.1412,0.2107)	1		0.0012 (-0.0018,0.0043)	1
SPTLC1	-0.0027656				1.093 (1.0087,1.1847)	1		0.2036 (0.0397,0.3675)	1		0.0018 (-0.0011,0.0047)	1
SSB		0.0020027			1.061 (0.9769,1.1518)	1		0.0863 (-0.0461,0.2187)	1		0.0034 (0.0011,0.0056)	1
SSBP1	-0.0005711				1.073 (0.9808,1.1748)	1		0.0377 (-0.1289,0.2042)	1		-0.0024 (-0.0052,4e-04)	1
SSC4D	0.0040715		0.711674		1.276 (1.1609,1.4031)	0.0013123		1.141 (0.9801,1.302)	0		0.0118 (0.009,0.0146)	7.23e-13
SSC5D	0.007484	0.0132267			1.469 (1.3387,1.6112)	1.23e-12		0.8374 (0.6903,0.9845)	4.81e-25		0.0086 (0.006,0.0111)	2.07e-07
SSH3	-0.0019883				1.02 (0.9241,1.1261)	1		0.2286 (0.0661,0.391)	1		0.003 (3e-04,0.0056)	1
ST3GAL1	0.0131972	0.0089148			1.011 (0.9231,1.1069)	1		-0.2555 (-0.3907,-0.1203)	0.627938		-0.0056 (-0.008,-0.0032)	0.0111445
ST8SIA1		-0.0004053			1.075 (0.9867,1.1711)	1		0.104 (-0.0555,0.2635)	1		0.0015 (-0.0013,0.0043)	1
STAB2	-0.0011566	-0.0093842			1.269 (1.1516,1.3973)	0.0041697		0.5346 (0.3653,0.7039)	1.99e-06		0.0093 (0.0063,0.0122)	1.51e-06
STAM		0.0002518			1.039 (0.9437,1.143)	1		-0.0531 (-0.2243,0.1181)	1		4e-04 (-0.0025,0.0033)	1
STAT2	0.0024152	0.0036888			1.103 (1.0009,1.215)	1		0.1283 (-0.0424,0.2991)	1		0.0031 (2e-04,0.006)	1
STC2	-8.94e-05				1.172 (1.0643,1.2905)	1		0.1746 (0.0287,0.3205)	1		0.0032 (8e-04,0.0057)	1
STEAP4	-0.0014717	-0.0065503			0.9757 (0.8798,1.082)	1		-0.0841 (-0.2502,0.0819)	1		-0.0011 (-0.004,0.0018)	1
STIP1		-0.0008776			1.061 (0.9698,1.1606)	1		0.2014 (0.0599,0.343)	1		0.0033 (9e-04,0.0057)	1
STX1B	-0.0011624	-0.0048749			0.9925 (0.8965,1.0989)	1		0.0118 (-0.1468,0.1703)	1		-2e-04 (-0.0029,0.0024)	1
STX3		-0.000248			1.104 (1.0173,1.1983)	1		0.2887 (0.1284,0.4491)	1		0.0021 (-6e-04,0.0047)	1
STX7		-0.0003851			1.03 (0.9287,1.1424)	1		0.2181 (0.049,0.3872)	1		0.0044 (0.0015,0.0073)	1
STXBP1	0.0065883				1.075 (0.9746,1.1857)	1		0.1437 (-0.0209,0.3083)	1		4e-04 (-0.0024,0.0033)	1
STXBP3	-0.0009827				1.006 (0.9194,1.1002)	1		0.0013 (-0.1321,0.1348)	1		0.0015 (-8e-04,0.0038)	1
SUGP1	2.43e-07	0.0123679			1.066 (0.9711,1.1706)	1		0.2374 (0.0651,0.4097)	1		0.0031 (2e-04,0.006)	1
SUMF1	7.64e-05				1.076 (0.9869,1.1723)	1		-0.0197 (-0.1833,0.1439)	1		9e-04 (-0.0019,0.0036)	1
SUMF2	0.0063235	0.0112674			1.248 (1.135,1.3727)	0.0141571		0.3646 (0.2252,0.5039)	0.000888		0.0031 (7e-04,0.0055)	1
SUSD1	0.0027937	0.0079132			1.021 (0.9318,1.1178)	1		0.16 (0.0243,0.2957)	1		0.0033 (0.001,0.0056)	1
SUSD2	-0.108458	-0.122086			1.085 (0.992,1.1863)	1		-0.3548 (-0.512,-0.1977)	0.0286794		-0.0058 (-0.0084,-0.0032)	0.0513395
SUSD4	0.0103958	0.0092425			1.063 (0.9677,1.1674)	1		0.0446 (-0.1325,0.2216)	1		0.0031 (0,0.0061)	1
SUSD5	-0.0129541	-0.0110936			0.8529 (0.7667,0.9488)	1		-0.3808 (-0.5749,-0.1866)	0.359406		-0.002 (-0.0053,0.0014)	1
SWAP70	-0.0210373	-0.0373749			1.159 (1.0694,1.2558)	0.935332		0.3341 (0.1606,0.5075)	0.473656		0.004 (0.0011,0.007)	1
SYNGAP1	0.0028265				0.9743 (0.8798,1.0789)	1		0.0417 (-0.108,0.1915)	1		0.0016 (-0.001,0.0041)	1
SYT1	0.0015475	0.0042444			0.8652 (0.7697,0.9727)	1		-0.1327 (-0.3189,0.0535)	1		-0.002 (-0.0052,0.0011)	1
TACC3	2.82e-05				1.067 (0.9747,1.1674)	1		0.0747 (-0.0619,0.2113)	1		0.0011 (-0.0013,0.0034)	1
TACSTD2	0.0407387	0.0471634			1.126 (1.022,1.2407)	1		-0.2184 (-0.3703,-0.0665)	1		-0.0035 (-0.0062,-9e-04)	1
TAGLN3	0.0037175	0.0062714			1.024 (0.9277,1.1309)	1		0.1318 (-0.0219,0.2854)	1		0.0035 (9e-04,0.0061)	1
TAP1	-0.0044424	-0.003683			1.001 (0.9072,1.104)	1		0.0089 (-0.1453,0.1631)	1		0.0021 (-6e-04,0.0047)	1
TARM1	-0.0002784				0.9847 (0.8899,1.0896)	1		0.0755 (-0.0853,0.2363)	1		0 (-0.0027,0.0027)	1
TBC1D17	-0.0091901	-0.0018437			0.9842 (0.8958,1.0814)	1		0.2511 (0.1113,0.3909)	1		0.0041 (0.0017,0.0065)	1
TBC1D23	0.0044546				1.025 (0.9372,1.1209)	1		0.0404 (-0.094,0.1749)	1		0.0019 (-4e-04,0.0042)	1
TBL1X	-0.003035	-0.009739			1.068 (0.9751,1.1695)	1		4e-04 (-0.1349,0.1357)	1		0.0013 (-0.001,0.0037)	1
TBR1		-0.0062802			0.9485 (0.852,1.0558)	1		-0.052 (-0.2092,0.1052)	1		5e-04 (-0.0023,0.0033)	1
TCL1A	-0.0039467	-0.0066239			0.9905 (0.9049,1.0843)	1		0.1377 (-0.0101,0.2855)	1		0.0031 (5e-04,0.0056)	1
TCL1B	0.0011758	0.0021154			1.031 (0.9459,1.1229)	1		-0.0648 (-0.2017,0.072)	1		-7e-04 (-0.0031,0.0017)	1
TCN1	-0.0096679	-0.0068115			1.082 (0.9926,1.1794)	1		0.017 (-0.1378,0.1718)	1		0.002 (-6e-04,0.0046)	1
TCN2	-0.0195119	-0.0221395	-2.24756		1.157 (1.065,1.2559)	1		-0.0332 (-0.1813,0.115)	1		6e-04 (-0.002,0.0032)	1
TCOF1	0.0066875	0.0016954			1.26 (1.1837,1.3415)	1.27e-09		0.6351 (0.4551,0.8152)	1.66e-08		0.0073 (0.0043,0.0104)	0.0057242
TCP11	-0.0021763	-0.0035675			1.072 (0.9835,1.1679)	1		0.0843 (-0.079,0.2475)	1		-0.0014 (-0.0043,0.0015)	1
TCTN3	0.0003685				1.525 (1.3854,1.679)	2.21e-14		0.911 (0.7408,1.0813)	7.8e-22		0.0093 (0.0063,0.0123)	4.33e-06
TDGF1		0.0016727			0.9825 (0.8968,1.0764)	1		0.0566 (-0.081,0.1942)	1		3e-04 (-0.0021,0.0026)	1
TEK	0.0499964	0.0620038			1.359 (1.2481,1.4806)	5.37e-09		0.2307 (0.093,0.3684)	1		0.0053 (0.0029,0.0076)	0.0457585
TERF1	-0.0115632	-0.0037864			0.9119 (0.8208,1.013)	1		-0.0142 (-0.1762,0.1478)	1		-0.0023 (-0.005,4e-04)	1
TET2		0.002493			1.003 (0.911,1.104)	1		-0.0155 (-0.1808,0.1498)	1		-0.0022 (-0.005,7e-04)	1
TEX101	0.0028794	0.0115169	1.72815		0.9696 (0.8424,1.116)	1		-0.3541 (-0.6013,-0.1069)	1		-0.0033 (-0.0075,0.001)	1
TF	-0.032573	-0.0444986			1.091 (0.9903,1.2015)	1		0.0775 (-0.0874,0.2425)	1		0.0076 (0.0048,0.0105)	0.0004237
TFF1	-0.0025332	-0.0018838	-2.03889		1.097 (1.0034,1.1983)	1		-0.072 (-0.2305,0.0864)	1		0.0044 (0.0016,0.0071)	1
TFF2	-0.0283986	-0.0315509	-4.65505		1.194 (1.0926,1.304)	0.255324		0.0589 (-0.0991,0.2169)	1		0.005 (0.0023,0.0077)	0.745694
TFF3		0.0012205			1.082 (0.9958,1.1746)	1		-0.1534 (-0.2931,-0.0138)	1		0.0029 (5e-04,0.0052)	1
TFRC		-0.0073816			1 (0.9137,1.0953)	1		-0.1209 (-0.2616,0.0198)	1		0.0041 (0.0017,0.0065)	1
TG	1.53e-05				1.011 (0.9176,1.1138)	1		-0.4039 (-0.5746,-0.2333)	0.0105806		-9e-04 (-0.0038,0.0021)	1
TGFA	-0.0263396	-0.0324584	-1.08678		1.175 (1.0824,1.2763)	0.356776		0.2936 (0.1428,0.4445)	0.401191		0.0097 (0.0071,0.0123)	6.28e-10
TGFB1		0.0046883			1.358 (1.2502,1.4746)	1.12e-09		0.247 (0.1016,0.3923)	1		0.0059 (0.0034,0.0084)	0.0118224
TGFB2	0.002197				1.007 (0.915,1.1085)	1		0.1137 (-0.0567,0.2841)	1		0.0028 (-1e-04,0.0057)	1
TGFBI	0.0183477	0.0261138			1.429 (1.3183,1.5496)	1.37e-14		0.4944 (0.3532,0.6355)	2.21e-08		0.0031 (7e-04,0.0056)	1
TGFBR1	0.0222283	0.0237998			1.046 (0.9505,1.1508)	1		-0.0844 (-0.2438,0.0749)	1		-1e-04 (-0.0028,0.0026)	1
TGFBR3	0.0433337	0.0560093			0.9292 (0.8521,1.0134)	1		-0.3599 (-0.5102,-0.2095)	0.0081232		-0.0022 (-0.0048,4e-04)	1
TGOLN2	0.0304411	0.0355649			0.9902 (0.9006,1.0887)	1		0.1839 (0.0067,0.3611)	1		0.0039 (8e-04,0.0069)	1
THAP12	0.0034099	0.0017946			0.9912 (0.8949,1.0978)	1		0.0409 (-0.1254,0.2071)	1		-5e-04 (-0.0033,0.0022)	1
THBD	0.0311159	0.0272919			1.084 (0.9915,1.1861)	1		0.0281 (-0.1238,0.1801)	1		0.0045 (0.0019,0.0071)	1
THBS2		-0.0088517			1.596 (1.5055,1.6927)	0		0.5093 (0.3583,0.6603)	1.25e-07		0.0093 (0.0068,0.0119)	2.76e-09
THBS4	-0.0167177	-0.023386			1.229 (1.1243,1.3425)	0.0158781		0.4663 (0.3159,0.6168)	3.92e-06		0.0069 (0.0043,0.0095)	0.0006335
THPO		0.0041919			1.013 (0.927,1.107)	1		0.0113 (-0.1306,0.1532)	1		0.001 (-0.0014,0.0035)	1
THSD1	0.0059453				0.9241 (0.8327,1.0254)	1		0.0115 (-0.1601,0.1832)	1		-4e-04 (-0.0033,0.0024)	1
THTPA		0.0044944			1.031 (0.9345,1.1368)	1		0.1814 (0.0147,0.348)	1		0.0021 (-8e-04,0.0049)	1
THY1	-0.0458706	-0.0885185			1.34 (1.2326,1.4573)	2.09e-08		0.2727 (0.1183,0.4271)	1		0.0082 (0.0055,0.0108)	5.2e-06
TIGIT	-0.007884	-0.0123493			1.012 (0.9217,1.1105)	1		0.027 (-0.1312,0.1853)	1		0.0043 (0.0016,0.007)	1
TIMD4	-0.0066769	-0.0069711			1.233 (1.1312,1.345)	0.005882		0.1985 (0.0522,0.3448)	1		0.0068 (0.0042,0.0093)	0.0005634
TIMP1	-0.0114424	-0.0166729			1.442 (1.3594,1.5306)	2.74e-30		0.3524 (0.1997,0.5051)	0.0182157		0.0092 (0.0066,0.0119)	2.63e-08
TIMP2	-0.0103517	-0.0085887			0.9927 (0.8978,1.0975)	1		0.0423 (-0.1217,0.2062)	1		0.0029 (2e-04,0.0056)	1
TIMP3		0.0001515			1.119 (1.0271,1.219)	1		0.2899 (0.1491,0.4306)	0.160359		0.0041 (0.0017,0.0065)	1
TIMP4	-0.0064383		-0.841366		1.081 (0.9857,1.1854)	1		-0.3241 (-0.4782,-0.17)	0.111533		-9e-04 (-0.0036,0.0018)	1
TINAGL1	0.0013157				1.166 (1.0643,1.277)	1		-0.2095 (-0.3535,-0.0654)	1		0.0042 (0.0017,0.0067)	1
TJP3		-0.0006998			0.9684 (0.8721,1.0753)	1		0.0085 (-0.1477,0.1647)	1		-2e-04 (-0.0029,0.0025)	1
TK1	0.0031294				1.081 (0.988,1.1836)	1		0.1275 (-0.037,0.292)	1		0.0026 (-3e-04,0.0055)	1
TLR1	-0.0203799	-0.0190879			1.137 (1.0377,1.2453)	1		0.1132 (-0.0616,0.2879)	1		0.0014 (-0.0016,0.0043)	1
TLR3	-0.0052024	-0.0041843			1.301 (1.1816,1.4332)	0.0002594		0.3976 (0.2602,0.5349)	4.35e-05		0.0039 (0.0015,0.0062)	1
TLR4		-0.0064844			0.9788 (0.886,1.0812)	1		0.047 (-0.1256,0.2197)	1		0.0023 (-6e-04,0.0052)	1
TMCO5A	0.0012629	0.0047489			1.044 (0.9484,1.1491)	1		-0.0015 (-0.1584,0.1554)	1		1e-04 (-0.0026,0.0028)	1
TMED1	0.0009073				1.048 (0.9562,1.1477)	1		-0.012 (-0.165,0.141)	1		-9e-04 (-0.0037,0.0018)	1
TMED10	0.0048537	0.0040334			1.061 (0.9767,1.1535)	1		0.0511 (-0.1051,0.2073)	1		8e-04 (-0.0018,0.0034)	1
TMEM132A	0.0066151	0.0138386			1.092 (0.9931,1.2004)	1		0.0343 (-0.1317,0.2002)	1		8e-04 (-0.0021,0.0037)	1
TMEM25	-0.0082413	-0.0021286			1.027 (0.9348,1.1293)	1		-0.1452 (-0.3089,0.0184)	1		-0.0017 (-0.0044,0.001)	1
TMPRSS11B	-0.0009834				1.015 (0.9199,1.1189)	1		-0.0845 (-0.2476,0.0786)	1		1e-04 (-0.0027,0.0029)	1
TMPRSS11D	-0.0189137	-0.0193584	-5.44113		0.9573 (0.8671,1.0567)	1		-0.0428 (-0.2222,0.1366)	1		5e-04 (-0.0026,0.0036)	1
TNC	-0.0003672				1.007 (0.9217,1.1004)	1		-0.214 (-0.3558,-0.0723)	1		0.001 (-0.0015,0.0035)	1
TNFAIP8	-0.0125789				1.051 (0.9621,1.1487)	1		-0.0421 (-0.1806,0.0964)	1		0.0015 (-9e-04,0.0038)	1
TNFRSF10A	-0.0026557	-0.003523	-3.5103		1.372 (1.2878,1.4611)	2.85e-19		0.3395 (0.1859,0.4931)	0.0440638		0.0078 (0.0052,0.0105)	3.67e-05
TNFRSF10C	-0.0052819	-0.0001794			1.091 (0.9948,1.1967)	1		0.0931 (-0.046,0.232)	1		0.0022 (-2e-04,0.0046)	1
TNFRSF11B	-0.0311893	-0.032778	-3.14702		1.344 (1.234,1.4632)	3.12e-08		0.3655 (0.2044,0.5267)	0.0260847		0.0073 (0.0046,0.01)	0.0003647
TNFRSF12A	-0.0037903				1.42 (1.3094,1.5408)	8.26e-14		0.3926 (0.238,0.5473)	0.0019612		0.0078 (0.0051,0.0104)	2.88e-05
TNFRSF13B	-0.0189943	-0.0403952			1.135 (1.0458,1.232)	1		0.0377 (-0.1091,0.1846)	1		0.0058 (0.0033,0.0083)	0.0174473
TNFRSF14	0.002099				1.267 (1.1679,1.3746)	3.64e-05		0.2026 (0.0449,0.3604)	1		0.0081 (0.0054,0.0107)	9.92e-06
TNFRSF17	0.0201444	0.0208129			0.9769 (0.8853,1.078)	1		-0.1902 (-0.3652,-0.0152)	1		0.0026 (-4e-04,0.0056)	1
TNFRSF19	-0.0117075	-0.0026444			1.036 (0.9484,1.1325)	1		-0.221 (-0.3861,-0.056)	1		9e-04 (-0.002,0.0038)	1
TNFRSF6B	-0.002124	-0.0013311			1.289 (1.1909,1.396)	1.06e-06		0.4055 (0.2508,0.5602)	0.0008477		0.0083 (0.0056,0.011)	6.9e-06
TNFRSF8		0.0008871			1.157 (1.0643,1.2575)	1		-0.0905 (-0.2304,0.0495)	1		0.0046 (0.0022,0.007)	0.647807
TNFRSF9	0.0125936	0.0241203			1.238 (1.1467,1.3369)	0.00014		0.0264 (-0.1271,0.18)	1		0.006 (0.0034,0.0086)	0.0154954
TNFSF11	-0.0024672				0.9574 (0.8716,1.0517)	1		0.0078 (-0.1356,0.1512)	1		0.0017 (-7e-04,0.0042)	1
TNFSF12		0.0008204			0.7921 (0.7242,0.8664)	0.0010201		-0.2279 (-0.366,-0.0898)	1		-0.002 (-0.0043,4e-04)	1
TNFSF13B	-0.0436259	-0.048178	-4.34355		1.321 (1.222,1.4272)	6.28e-09		0.1874 (0.03,0.3448)	1		0.0048 (0.0021,0.0075)	1
TNNI3		-0.0018139			1.056 (0.9611,1.1602)	1		0.0547 (-0.0812,0.1907)	1		-6e-04 (-0.003,0.0017)	1
TNR		-0.0213798			1.033 (0.9391,1.1356)	1		-0.0941 (-0.2412,0.053)	1		-0.0015 (-0.0041,0.001)	1
TNXB	0.0401326	0.0766128			1.061 (0.9697,1.1612)	1		-0.0386 (-0.1794,0.1023)	1		-0.0025 (-0.0049,-1e-04)	1
TOP1	-0.0010085	-0.0018059			1.039 (0.9415,1.1463)	1		0.185 (0.0207,0.3493)	1		0 (-0.0028,0.0028)	1
TOP1MT		-0.0034028			0.9146 (0.82,1.0201)	1		0.0497 (-0.101,0.2004)	1		-0.0012 (-0.0037,0.0014)	1
TP53		-0.0024122			1.074 (0.9823,1.1734)	1		0.159 (0.0312,0.2867)	1		0.0012 (-0.001,0.0034)	1
TP53BP1	0.0032812				0.9817 (0.885,1.0889)	1		0.0789 (-0.0852,0.243)	1		0.0026 (-2e-04,0.0055)	1
TP53I3	0.0020524	0.004606			1.347 (1.2289,1.4753)	5.08e-07		0.4226 (0.2499,0.5952)	0.0048856		0.0046 (0.0017,0.0075)	1
TPBGL	-0.0054987	-0.0149858			0.866 (0.7734,0.9697)	1		-0.1132 (-0.2728,0.0464)	1		-5e-04 (-0.0032,0.0022)	1
TPK1	0.0279151	0.0196172			1.104 (1.0029,1.2164)	1		0.0838 (-0.0863,0.2539)	1		0.0029 (0,0.0058)	1
TPM3	0.0041239	0.0125099			1.079 (0.9846,1.1832)	1		0.0705 (-0.0925,0.2335)	1		9e-04 (-0.0019,0.0037)	1
TPP1		0.0007678			1.347 (1.258,1.4424)	3.93e-14		0.5776 (0.427,0.7282)	1.95e-10		0.0086 (0.0061,0.0112)	1.75e-07
TPPP2		0.0043678			1.029 (0.9368,1.1308)	1		-0.0062 (-0.1735,0.1611)	1		0 (-0.0029,0.0029)	1
TPR	-0.0009285				1.143 (1.0622,1.2303)	1		0.3866 (0.2053,0.5679)	0.087134		0.0058 (0.0028,0.0088)	0.436255
TPRKB	0.0076682	0.0142727			0.9836 (0.8878,1.0898)	1		0.0048 (-0.1717,0.1812)	1		-3e-04 (-0.0033,0.0027)	1
TPSD1		-0.0008488			1.007 (0.9125,1.1111)	1		-0.088 (-0.2453,0.0693)	1		6e-04 (-0.002,0.0033)	1
TPSG1	0.0069807				1.046 (0.9527,1.1488)	1		-0.032 (-0.1944,0.1303)	1		-0.0029 (-0.0056,-1e-04)	1
TRAF3	0.0044148	0.0011038			1.013 (0.9185,1.118)	1		-0.027 (-0.2032,0.1492)	1		-9e-04 (-0.0039,0.002)	1
TRDMT1		-0.0004347			1.065 (0.9715,1.1672)	1		-0.0612 (-0.229,0.1066)	1		0.001 (-0.0018,0.0039)	1
TREH	0.0067572	0.008806			1.483 (1.3359,1.6473)	4.62e-10		0.7737 (0.6099,0.9375)	1.11e-16		0.0091 (0.0063,0.012)	1.14e-06
TRIM25		-0.0031829			1.023 (0.9279,1.127)	1		0.0895 (-0.073,0.2519)	1		0.001 (-0.0018,0.0038)	1
TRIM26	-0.0037153	-0.0006762			0.9896 (0.8947,1.0946)	1		0.0191 (-0.1572,0.1955)	1		5e-04 (-0.0025,0.0034)	1
TRIM40	-0.000523	-0.0018575			1.069 (0.9727,1.1738)	1		0.017 (-0.1518,0.1859)	1		5e-04 (-0.0024,0.0034)	1
TSC22D1	0.0001241				1.117 (1.0205,1.2229)	1		0.1021 (-0.0622,0.2665)	1		0.001 (-0.0018,0.0038)	1
TSHB	0.0053126	0.0076494			0.9965 (0.9126,1.0882)	1		-0.1223 (-0.2588,0.0141)	1		-0.0024 (-0.0048,-1e-04)	1
TSPAN1	-0.0055168				0.9882 (0.8995,1.0855)	1		-0.0877 (-0.2513,0.0759)	1		0.001 (-0.0019,0.0038)	1
TSPAN7	0.0066765	0.005553			0.9843 (0.8876,1.0915)	1		-0.0252 (-0.1695,0.1191)	1		5e-04 (-0.002,0.003)	1
TSPAN8		-0.0062995			1.38 (1.2535,1.5183)	1.36e-07		0.2917 (0.1253,0.4581)	1		0.0033 (5e-04,0.0061)	1
TST	0.0032384				1.105 (1.0104,1.2091)	1		0.0989 (-0.0392,0.2371)	1		0.0012 (-0.0011,0.0036)	1
TTR	0.030225	0.079572	7.6086		0.9821 (0.8853,1.0894)	1		0.3942 (0.2045,0.584)	0.138503		-0.0046 (-0.0078,-0.0013)	1
TXK	0.001373				0.991 (0.8968,1.0952)	1		-0.0378 (-0.2002,0.1245)	1		4e-04 (-0.0024,0.0032)	1
TXNDC5	0.0021979				1.127 (1.0327,1.2289)	1		0.0672 (-0.0733,0.2077)	1		0.0034 (0.001,0.0058)	1
TYMP	-0.0016758	-0.0032633			1.273 (1.1651,1.3909)	0.0002707		0.1047 (-0.0332,0.2426)	1		0.0031 (7e-04,0.0054)	1
TYRO3	-0.0066468	-0.0334912			1.201 (1.098,1.3133)	0.17868		0.1517 (0.0139,0.2894)	1		0.0025 (1e-04,0.0049)	1
UBAC1	0.0016914	0.0007773			1.016 (0.9277,1.1124)	1		0.1282 (-0.0094,0.2657)	1		0.0012 (-0.0012,0.0035)	1
UBE2B	0.0018942	0.0035726			1.003 (0.9077,1.1075)	1		0.068 (-0.0904,0.2263)	1		0.001 (-0.0017,0.0036)	1
UBQLN3		-0.0001517			1.078 (0.9938,1.1684)	1		0.1182 (-0.0645,0.3008)	1		0.0013 (-0.0019,0.0045)	1
UGDH	0.0018547				1.017 (0.9232,1.1214)	1		-0.0948 (-0.2543,0.0648)	1		-2e-04 (-0.0029,0.0025)	1
UNC5D	0.0041152				0.9576 (0.8637,1.0616)	1		-0.0839 (-0.2478,0.0799)	1		-5e-04 (-0.0033,0.0023)	1
UNG	0.018945	0.006942			1.003 (0.911,1.1047)	1		0.0849 (-0.0776,0.2474)	1		7e-04 (-0.002,0.0035)	1
UPK3A	0.0028527	0.0007527			0.9813 (0.8868,1.0859)	1		-0.0784 (-0.2384,0.0815)	1		1e-04 (-0.0028,0.0029)	1
UPK3BL1	0.000338				0.9789 (0.8847,1.0832)	1		-0.119 (-0.2949,0.057)	1		-2e-04 (-0.0032,0.0027)	1
VAT1	-0.0148105	-0.0420784			0.9867 (0.9009,1.0807)	1		-0.2203 (-0.3587,-0.082)	1		0.001 (-0.0015,0.0034)	1
VCAN	0.0124337	0.0097727			1.054 (0.9614,1.1548)	1		-0.2439 (-0.3863,-0.1015)	1		1e-04 (-0.0024,0.0026)	1
VCPKMT	0.0017841	0.0043239			1.045 (0.9526,1.1464)	1		0.0795 (-0.0797,0.2387)	1		9e-04 (-0.0019,0.0037)	1
VEGFA	-0.0042957	-0.0007907			1.16 (1.0642,1.264)	1		0.3585 (0.217,0.4999)	0.0020477		0.0043 (0.0018,0.0067)	1
VEGFB	0.0019599	0.006351			1.051 (0.9498,1.1623)	1		0.2255 (0.0452,0.4059)	1		0.0047 (0.0016,0.0078)	1
VEGFD		0.0073016			0.9348 (0.8546,1.0225)	1		-0.3956 (-0.5392,-0.2521)	0.000201		-0.003 (-0.0054,-6e-04)	1
VGF	0.0055579	0.0157517			0.9281 (0.8409,1.0243)	1		-0.1559 (-0.327,0.0153)	1		-0.0034 (-0.0063,-5e-04)	1
VIM	-0.0007503	-0.0010898			1.01 (0.9217,1.1064)	1		0.0628 (-0.0683,0.1939)	1		2e-04 (-0.0021,0.0025)	1
VIT	-0.001488				1.042 (0.9371,1.1585)	1		0.1845 (-0.0103,0.3793)	1		0.0058 (0.0025,0.0092)	1
VMO1	-0.0129239	-0.0168209			1.286 (1.1653,1.4199)	0.0017173		0.3386 (0.1993,0.4778)	0.0056921		0.0049 (0.0025,0.0073)	0.227741
VNN1		-0.0035444			1.495 (1.3436,1.6631)	4.41e-10		0.9641 (0.7978,1.1304)	7.21e-26		0.0096 (0.0067,0.0125)	2.82e-07
VNN2		-0.0010704			1.206 (1.095,1.3272)	0.404989		0.0865 (-0.0517,0.2246)	1		0.004 (0.0015,0.0064)	1
VSIG10	0.0098461	0.017693			1.113 (1.0302,1.2028)	1		0.1726 (-0.0033,0.3485)	1		0.0024 (-6e-04,0.0055)	1
VSIG10L	-0.0095908	-0.0203509			1.145 (1.0502,1.2479)	1		0.0571 (-0.1152,0.2293)	1		-0.0015 (-0.0045,0.0015)	1
VSIG2	-0.007752				1.159 (1.0629,1.2645)	1		0.1139 (-0.0807,0.3084)	1		0.0057 (0.0024,0.009)	1
VSIG4		-0.0009176			1.379 (1.2639,1.5046)	1.45e-09		0.2748 (0.1113,0.4382)	1		0.0108 (0.0081,0.0137)	1.19e-10
VSIR		0.0036091			1.111 (1.0223,1.2079)	1		0.1508 (0.0104,0.2912)	1		0.0034 (0.001,0.0058)	1
VSNL1	-0.0027394	-0.0136655			1.413 (1.3265,1.5046)	1.68e-23		0.7799 (0.5874,0.9724)	8.14e-12		0.0044 (0.001,0.0078)	1
VSTM1	0.0018338	0.0004857			1.047 (0.9564,1.1459)	1		0.0084 (-0.1321,0.1488)	1		0.0012 (-0.0012,0.0036)	1
VTCN1	0.0100386	0.0039138			1.128 (1.0312,1.2332)	1		-0.0594 (-0.1937,0.0748)	1		9e-04 (-0.0014,0.0032)	1
VWA1	0.0331528	0.0301018			1.441 (1.3191,1.5748)	1.78e-12		0.771 (0.6259,0.9161)	1.19e-21		0.0126 (0.0101,0.0151)	3.66e-19
VWA5A	-0.0008726	-0.0004215			1.087 (0.9999,1.1824)	1		0.0226 (-0.1369,0.1821)	1		3e-04 (-0.0024,0.003)	1
VWC2	-0.0180806	-0.0266203			0.9812 (0.8933,1.0777)	1		-0.0156 (-0.1729,0.1418)	1		0.0022 (-5e-04,0.0049)	1
VWC2L	-0.0080559	-0.0126414			0.7919 (0.6921,0.906)	1		-0.2324 (-0.4158,-0.049)	1		-0.0011 (-0.0042,0.002)	1
VWF	0.010183	0.0169332			1.187 (1.0867,1.2969)	0.417262		0.2043 (0.0634,0.3451)	1		0.0048 (0.0024,0.0071)	0.297752
WARS	-0.003498	-0.018557			1.261 (1.1527,1.3791)	0.0011819		0.2341 (0.1067,0.3616)	0.937085		0.0059 (0.0038,0.0081)	0.0002776
WASF3	0.0013333	0.0014227			0.9805 (0.8961,1.0729)	1		-0.0841 (-0.2179,0.0498)	1		-3e-04 (-0.0026,0.0019)	1
WASHC3	-0.0030932				1.075 (0.9772,1.1821)	1		0.1788 (0.0103,0.3473)	1		0.0018 (-0.0011,0.0047)	1
WASL	0.008536	0.0029383			0.9153 (0.8212,1.0202)	1		-0.0444 (-0.2134,0.1247)	1		5e-04 (-0.0024,0.0034)	1
WDR46	-0.0054452				1.085 (0.9932,1.185)	1		0.2686 (0.1026,0.4346)	1		0.0038 (0.001,0.0066)	1
WFDC12	0.0063439	0.0102654			1.085 (0.9856,1.1953)	1		0.1296 (-0.0223,0.2816)	1		0.0037 (0.0011,0.0063)	1
WFDC2	-0.0375108	-0.0249078	-0.25247		1.183 (1.0785,1.2973)	1		-0.2466 (-0.4459,-0.0473)	1		0.0069 (0.0034,0.0103)	0.326387
WFIKKN1	0.0057896	0.0205572	4.5525		1.045 (0.9493,1.1499)	1		0.2542 (0.1038,0.4046)	1		0.0026 (0,0.0052)	1
WFIKKN2	-0.0570662	-0.0744781	-3.03037		0.8144 (0.7421,0.8937)	0.0436255		-0.6295 (-0.7803,-0.4788)	1.02e-12		-0.0098 (-0.0124,-0.0072)	5.37e-10
WIF1	-0.0131295	-0.0217202			1.061 (0.9682,1.1633)	1		-0.372 (-0.5174,-0.2266)	0.0016118		-0.0014 (-0.0039,0.0011)	1
WNT9A	-0.0122883	-0.0082876			0.932 (0.8433,1.0302)	1		-0.4773 (-0.6313,-0.3233)	3.9e-06		-0.0032 (-0.0058,-6e-04)	1
WWP2	-0.0015558				1.076 (0.9834,1.1774)	1		0.153 (0.0175,0.2886)	1		0.003 (7e-04,0.0054)	1
XG	-0.0906246	-0.145216	-17.56		1.062 (0.9506,1.1871)	1		0.1887 (4e-04,0.3769)	1		0.0035 (2e-04,0.0067)	1
XRCC4		0.0013425			1.088 (0.9979,1.187)	1		0.1698 (0.0362,0.3034)	1		0.0027 (5e-04,0.005)	1
YAP1	0.0139702	0.0149837			1.264 (1.1653,1.3713)	4.82e-05		0.4888 (0.285,0.6926)	0.0078602		0.0089 (0.0054,0.0124)	0.0023493
YJU2	0.0018385				1.062 (0.9653,1.1677)	1		0.1255 (-0.0441,0.2952)	1		0.0021 (-7e-04,0.005)	1
ZBTB16	0.0004664	0.0051422			1.105 (1.0126,1.2048)	1		0.0211 (-0.1156,0.1579)	1		6e-04 (-0.0017,0.003)	1
ZBTB17		0.0023862			1.18 (1.1003,1.2659)	0.0105397		0.1698 (0.0265,0.3131)	1		0.005 (0.0026,0.0075)	0.142535
ZCCHC8	-0.005186	-0.0018005			1.068 (0.9735,1.1709)	1		0.0644 (-0.0983,0.2271)	1		0.0024 (-4e-04,0.0052)	1
ZNF174		-0.0048695			0.9914 (0.8974,1.0954)	1		0.0236 (-0.1425,0.1896)	1		-1e-04 (-0.0029,0.0027)	1
ZNF75D	0.0071116	0.0060085			0.963 (0.8691,1.0672)	1		0.0837 (-0.0882,0.2556)	1		5e-04 (-0.0025,0.0034)	1
ZNF830		-0.0011571			0.9877 (0.8932,1.0923)	1		-0.0743 (-0.2389,0.0903)	1		-1e-04 (-0.0029,0.0027)	1
ZNRD2	-0.0051366	-0.001669			1.188 (1.0846,1.3006)	0.600179		0.1809 (0.0088,0.3529)	1		0.003 (1e-04,0.0059)	1
ZP4	-0.0022609	-0.0020108			0.9667 (0.8673,1.0774)	1		0.0318 (-0.1203,0.1839)	1		0 (-0.0026,0.0026)	1
Note: Lung function indices were natural log-transformed, protein biomarkers were scaled. FDR indicates Bonferroni-corrected P value.
Models were adjusted for age, sex, ethnicity, Townsend Deprivation Index, educational level, smoking status, alcohol consumption frequency, physical activity, metabolic syndrome components, and coronary heart disease.
