# Supplementary material for: Lung function, proteomic signatures, and risk of metabolic dysfunction-associated steatotic liver disease
Source: Research Square preprint supplement (doi:10.21203/rs.3.rs-6381296/v1), 2025-04-08
Supplement: Supplementary file 6 [file 418b9fc7d7b1d71eea7e3801.xlsx]

## Sheet: Table S8
Table S8. Stratified analyses of associations between lung function-related proteomic signature and MASLD risk.
Subgroup	Events (%)	Person-years	FEV1		FVC		PEF
			HR (95% CI)	Pforinteraction	HR (95% CI)	Pforinteraction	HR (95% CI)	Pforinteraction
All	652 (1.4)	621421	0.55 (0.47-0.65)		0.55 (0.47-0.65)		0.54 (0.45-0.65)
Sex				0.219		0.419		0.43
Female	326 (1.3)	342331	0.66 (0.51-0.84)		0.63 (0.49-0.81)		0.57 (0.43-0.76)
Male	326 (1.5)	279090	0.47 (0.38-0.59)		0.49 (0.38-0.61)		0.51 (0.40-0.66)
Obesity				0.001		0.003		0.005
Yes	317 (0.9)	474452	0.52 (0.41-0.65)		0.51 (0.40-0.65)		0.48 (0.37-0.63)
No	330 (3.0)	145512	0.71 (0.56-0.91)		0.73 (0.57-0.94)		0.75 (0.58-0.98)
Smoking status				0.211		0.194		0.482
Non-smokers	283 (1.1)	347462	0.48 (0.37-0.61)		0.47 (0.37-0.61)		0.53 (0.39-0.70)
Former smokers	273 (1.7)	211476	0.63 (0.49-0.82)		0.65 (0.50-0.85)		0.56 (0.42-0.74)
Current smokers	94 (2.0)	60578	0.58 (0.38-0.89)		0.54 (0.34-0.84)		0.54 (0.34-0.86)
Excessive alcohol intake				0.79		0.959		0.715
Yes	112 (1.4)	102967	0.38 (0.25-0.56)		0.40 (0.26-0.60)		0.32 (0.21-0.50)
No	337 (1.2)	377829	0.54 (0.43-0.67)		0.51 (0.40-0.64)		0.57 (0.44-0.74)
PM2.5 exposure				0.128		0.183		0.376
High	350 (1.6)	281967	0.70 (0.56-0.87)		0.71 (0.57-0.88)		0.65 (0.50-0.84)
Low	278 (1.3)	286196	0.43 (0.33-0.56)		0.41 (0.32-0.54)		0.43 (0.32-0.58)
NO2 exposure				0.241		0.288		0.741
High	367 (1.6)	304658	0.63 (0.51-0.78)		0.63 (0.51-0.79)		0.58 (0.45-0.75)
Low	280 (1.2)	307733	0.47 (0.37-0.61)		0.47 (0.36-0.61)		0.50 (0.37-0.66)
HRs were calculated using Cox-proportional hazards regression analysis after adjustments for age, sex, ethnicity, Townsend Deprivation Index, educational level, smoking status, alcohol consumption frequency, physical activity, metabolic syndrome components and coronary heart disease, and corresponding lung indices. P-values indicate P for interaction for proteomic signatures and subgroups. Excess…
Abbreviations: MASLD, metabolic dysfunction-associated steatotic liver disease; HR, hazard ratio; CI, confidence interval; FEV1, forced expiratory volume in 1s; FVC, forced vital capacity; PEF, peak expiratory flow; PM2.5, particulate matter with aerodynamic diameters of < 2.5 µm; NO2, nitrogen dioxide.
