# Supplementary material for: Lung function, proteomic signatures, and risk of metabolic dysfunction-associated steatotic liver disease
Source: Research Square preprint supplement (doi:10.21203/rs.3.rs-6381296/v1), 2025-04-08
Supplement: Supplementary file 8 [file ae18b3e60ddf7a91e3be02bb.xlsx]

## Sheet: Table S9
Table S9. Sensitivity analysis of the relationship between proteomic signature and the risk of MASLD.
Proteomic signatures	Excluding participants developed MASLD within two years (n=46,778)	Excluding participants with increased or excessive alcohol intake a (n=39,287)	Excluding participants with missing covariates (n=43,202)	Fine-Gray regression
FEV1
Model 1	0.54 (0.47-0.63)	0.59 (0.50-0.70)	0.52 (0.44-0.60)	0.58 (0.49-0.69)
Model 2	0.55 (0.46-0.65)	0.60 (0.50-0.72)	0.51 (0.43-0.61)	0.57 (0.48-0.69)
FVC
Model 1	0.53 (0.45-0.62)	0.56 (0.47-0.66)	0.50 (0.43-0.59)	0.54 (0.45-0.63)
Model 2	0.55 (0.46-0.64)	0.59 (0.49-0.71)	0.52 (0.43-0.62)	0.55 (0.45-0.66)
PEF
Model 1	0.52 (0.43-0.63)	0.59 (0.49-0.73)	0.49 (0.40-0.59)	0.59 (0.48-0.73)
Model 2	0.53 (0.44-0.65)	0.61 (0.49-0.75)	0.49 (0.40-0.60)	0.59 (0.48-0.73)
a Excessive alcohol intake was defined as alcohol consumption≥20/30 gram, female/ male per day.
Model 1 was adjusted for age, sex, ethnicity, Townsend Deprivation Index, educational level, smoking status, alcohol consumption frequency, physical activity, metabolic syndrome components, and coronary heart disease. Model 2 was further adjusted for corresponding lung function measure to evaluate their independent associations.
Abbreviations: SD, standard deviation; MASLD, metabolic dysfunction-associated steatotic liver disease; HR, hazard ratio; OR, odds ratio; CI, confidence interval; PDFF, proton density fat fraction; cT1, liver iron corrected T1; FEV1, forced expiratory volume in 1s; FVC, forced vital capacity; PEF, peak expiratory flow.
