# Supplementary material for: Lung function, proteomic signatures, and risk of metabolic dysfunction-associated steatotic liver disease
Source: Research Square preprint supplement (doi:10.21203/rs.3.rs-6381296/v1), 2025-04-08
Supplement: Supplementary file 9 [file badd0c603cda7636ce5555f4.xlsx]

## Sheet: Table S7
Table S7. Top 10 KEGG pathways for proteins constituting the proteomic signatures of lung function measures.
Subcategory	Exposure	Pathway	Change of the protein	Number of protein	FDR	Proteins involved
Signaling molecules and interaction	FEV1	Cytokine-cytokine receptor interaction	Downregulated	93	1.13e-26	ACVRL1/BMP6/CCL11/CCL13/CCL14/CCL15/CCL16/CCL17/CCL18/CCL19/CCL20/CCL21/CCL22/CCL25/CCL26/CCL27/CCL28/CCL3/CCL4/CCL5/CCL7/CCL8/CD27/CD4/CD40/CD40LG/CSF1/CSF1R/CSF2RB/CSF3/CSF3R/CXCL1/CXCL10/CXCL11/CXCL13/CXCL16/CXCL17/CXCL3/CXCL5/CXCL6/CXCL8/CXCL9/EDA2R/EPO/GDF15/GHR/IFNG/IFNGR2/IFNLR1/IL12RB1/IL13RA1/IL15/IL16/IL17A/IL17C/IL18/IL18R1/IL19/IL1B/IL1R2/IL1RL1/IL1RN/IL22/IL2RA/IL5RA/IL6/IL7/INHBB/IN…
Signaling molecules and interaction	FVC	Cytokine-cytokine receptor interaction	Downregulated	93	1.64e-23	ACVRL1/BMP6/CCL11/CCL13/CCL14/CCL15/CCL16/CCL17/CCL18/CCL19/CCL20/CCL21/CCL22/CCL25/CCL26/CCL27/CCL28/CCL3/CCL4/CCL5/CCL7/CCL8/CD27/CD4/CD40/CD40LG/CSF1/CSF1R/CSF2RB/CSF3/CTF1/CXCL1/CXCL10/CXCL11/CXCL13/CXCL16/CXCL17/CXCL3/CXCL5/CXCL6/CXCL8/CXCL9/EDA2R/EPO/GDF15/GHR/IFNGR2/IFNLR1/IL12RB1/IL13RA1/IL15/IL16/IL17A/IL17C/IL18/IL18R1/IL19/IL1B/IL1R2/IL1RL1/IL1RN/IL22/IL2RA/IL5RA/IL6/IL7/INHBB/INHBC/LE…
Signaling molecules and interaction	PEF	Cytokine-cytokine receptor interaction	Downregulated	68	2.72e-38	ACVRL1/CCL11/CCL14/CCL15/CCL16/CCL17/CCL18/CCL19/CCL20/CCL21/CCL22/CCL25/CCL28/CCL3/CCL5/CCL7/CCL8/CD27/CD4/CD40/CSF1/CSF3/CXCL10/CXCL11/CXCL13/CXCL16/CXCL5/CXCL9/EDA2R/EPO/GDF15/IFNG/IFNGR2/IL12RB1/IL13RA1/IL15/IL17C/IL18/IL18R1/IL19/IL1RN/IL22/IL2RA/IL6/INHBB/INHBC/LEP/OSM/OSMR/RELT/THPO/TNF/TNFRSF10A/TNFRSF10B/TNFRSF11A/TNFRSF11B/TNFRSF12A/TNFRSF13B/TNFRSF14/TNFRSF17/TNFRSF19/TNFRSF1A/TNFRSF1B…
Cardiovascular disease	FVC	Lipid and atherosclerosis	Downregulated	53	9.55e-09	AKT2/AKT3/ARHGEF1/BAX/BCL2L1/BID/CASP1/CASP3/CASP7/CCL3/CCL5/CD36/CD40/CD40LG/CXCL1/CXCL3/CXCL8/ERN1/HSPA1A/ICAM1/IKBKG/IL18/IL1B/IL6/IRAK1/IRAK4/ITPR1/LBP/LDLR/LY96/LYN/MAP2K6/MAPK9/MMP1/MMP9/NCF2/NFATC1/NFKB1/OLR1/PLCB2/PPP3R1/SELE/SELP/SOD2/SRC/TANK/TNF/TNFRSF10A/TNFRSF10B/TNFRSF1A/TNFSF10/TP53/VAV3
Cardiovascular disease	FEV1	Lipid and atherosclerosis	Downregulated	48	7.28e-08	AKT2/AKT3/ARHGEF1/BAX/BCL2L1/BID/CASP1/CASP3/CASP7/CCL3/CCL5/CD14/CD36/CD40/CD40LG/CXCL1/CXCL3/CXCL8/ERN1/HSPA1A/ICAM1/IL18/IL1B/IL6/IRAK1/IRAK4/ITPR1/LBP/LDLR/LY96/LYN/MAP2K6/MAPK9/MMP1/MMP9/NFKB1/OLR1/PLCB2/PPP3R1/SELE/SELP/SOD2/TNF/TNFRSF10A/TNFRSF10B/TNFRSF1A/TP53/VAV3
Immune system	FVC	Chemokine signaling pathway	Downregulated	47	6.38e-08	AKT2/AKT3/CCL11/CCL13/CCL14/CCL15/CCL16/CCL17/CCL18/CCL19/CCL20/CCL21/CCL22/CCL25/CCL26/CCL27/CCL28/CCL3/CCL4/CCL5/CCL7/CCL8/CRKL/CXCL1/CXCL10/CXCL11/CXCL13/CXCL16/CXCL3/CXCL5/CXCL6/CXCL8/CXCL9/FGR/FOXO3/IKBKG/LYN/MAP2K1/NFKB1/PF4/PLCB2/PPBP/PXN/SRC/STAT2/STAT5B/VAV3
Signaling molecules and interaction	FVC	Viral protein interaction with cytokine and cytokine receptor	Downregulated	46	6.57e-19	CCL11/CCL13/CCL14/CCL15/CCL16/CCL17/CCL18/CCL19/CCL20/CCL21/CCL22/CCL25/CCL26/CCL27/CCL28/CCL3/CCL4/CCL5/CCL7/CCL8/CSF1/CSF1R/CXCL1/CXCL10/CXCL11/CXCL13/CXCL3/CXCL5/CXCL6/CXCL8/CXCL9/IL18/IL18R1/IL19/IL2RA/IL6/PF4/PPBP/TNF/TNFRSF10A/TNFRSF10B/TNFRSF14/TNFRSF1A/TNFRSF1B/TNFSF10/TNFSF14
Signaling molecules and interaction	FEV1	Viral protein interaction with cytokine and cytokine receptor	Downregulated	45	1.18e-19	CCL11/CCL13/CCL14/CCL15/CCL16/CCL17/CCL18/CCL19/CCL20/CCL21/CCL22/CCL25/CCL26/CCL27/CCL28/CCL3/CCL4/CCL5/CCL7/CCL8/CSF1/CSF1R/CXCL1/CXCL10/CXCL11/CXCL13/CXCL3/CXCL5/CXCL6/CXCL8/CXCL9/IL18/IL18R1/IL19/IL2RA/IL6/PF4/PPBP/TNF/TNFRSF10A/TNFRSF10B/TNFRSF14/TNFRSF1A/TNFRSF1B/TNFSF14
Immune system	FEV1	Chemokine signaling pathway	Downregulated	44	1.33e-07	AKT2/AKT3/CCL11/CCL13/CCL14/CCL15/CCL16/CCL17/CCL18/CCL19/CCL20/CCL21/CCL22/CCL25/CCL26/CCL27/CCL28/CCL3/CCL4/CCL5/CCL7/CCL8/CRKL/CXCL1/CXCL10/CXCL11/CXCL13/CXCL16/CXCL3/CXCL5/CXCL6/CXCL8/CXCL9/FGR/LYN/MAP2K1/NFKB1/PF4/PLCB2/PPBP/PXN/STAT2/STAT5B/VAV3
Cell growth and death	FVC	Apoptosis	Downregulated	39	1.81e-08	AIFM1/AKT2/AKT3/BAX/BCL2L1/BID/BIRC2/CASP10/CASP2/CASP3/CASP7/CSF2RB/CTSC/CTSD/CTSH/CTSL/CTSO/CTSS/CTSV/CTSZ/DFFA/DIABLO/ERN1/FADD/HTRA2/IKBKG/ITPR1/LMNB1/LMNB2/MAP2K1/MAPK9/NFKB1/PARP1/TNF/TNFRSF10A/TNFRSF10B/TNFRSF1A/TNFSF10/TP53
Transport and catabolism	FVC	Lysosome	Downregulated	38	2.68e-08	ABCA2/ACP5/AP1G2/AP3B1/AP3S2/ARSA/ARSB/ASAH1/CD63/CLTA/CTSC/CTSD/CTSH/CTSL/CTSO/CTSS/CTSV/CTSZ/FUCA1/GLA/GLB1/GM2A/GUSB/HYAL1/IDUA/IGF2R/LAMP1/LAMP2/LGMN/NAGPA/NPC2/PLA2G15/PSAP/SCARB2/SGSH/SMPD1/SORT1/TPP1
Immune system	FVC	Complement and coagulation cascades	Downregulated	37	1.3e-13	C1R/C1S/C2/C3/C5/C7/C8B/CFB/CFD/CFH/CFHR5/CFI/CPB2/CR1/F10/F11/F2R/F7/F9/FGA/ITGAM/ITGB2/KLKB1/MASP1/PLAT/PLAUR/PLG/PROC/PROS1/SERPIND1/SERPINE1/SERPINE2/SERPINF2/SERPING1/TFPI/VSIG4/VWF
Cell growth and death	FEV1	Apoptosis	Downregulated	35	1.79e-07	AIFM1/AKT2/AKT3/BAX/BCL2L1/BCL2L11/BID/CASP10/CASP2/CASP3/CASP7/CSF2RB/CTSC/CTSD/CTSH/CTSL/CTSO/CTSS/CTSZ/DFFA/DIABLO/ERN1/FADD/HTRA2/ITPR1/LMNB2/MAP2K1/MAPK9/NFKB1/PARP1/TNF/TNFRSF10A/TNFRSF10B/TNFRSF1A/TP53
Signal transduction	FVC	TNF signaling pathway	Downregulated	35	4.44e-08	AKT2/AKT3/BAG4/BIRC2/CASP10/CASP3/CASP7/CCL20/CCL5/CEBPB/CSF1/CXCL1/CXCL10/CXCL3/CXCL5/CXCL6/EDN1/FADD/ICAM1/IKBKG/IL15/IL18R1/IL1B/IL6/LIF/MAP2K1/MAP2K6/MAPK9/MMP9/NFKB1/SELE/TNF/TNFRSF1A/TNFRSF1B/VEGFC
Signaling molecules and interaction	PEF	Viral protein interaction with cytokine and cytokine receptor	Downregulated	34	1.57e-24	CCL11/CCL14/CCL15/CCL16/CCL17/CCL18/CCL19/CCL20/CCL21/CCL22/CCL25/CCL28/CCL3/CCL5/CCL7/CCL8/CSF1/CXCL10/CXCL11/CXCL13/CXCL5/CXCL9/IL18/IL18R1/IL19/IL2RA/IL6/TNF/TNFRSF10A/TNFRSF10B/TNFRSF14/TNFRSF1A/TNFRSF1B/TNFSF14
Immune system	FEV1	Complement and coagulation cascades	Downregulated	33	1.56e-11	C1R/C1S/C2/C3/C5/C7/C8B/C9/CFB/CFD/CFH/CFHR5/CFI/CPB2/F10/F2R/F7/F9/FGA/ITGAM/ITGB2/PLAT/PLAUR/PLG/PROC/PROS1/SERPIND1/SERPINE1/SERPINE2/SERPING1/TFPI/VSIG4/VWF
Signal transduction	FEV1	TNF signaling pathway	Downregulated	32	2.07e-07	AKT2/AKT3/BAG4/CASP10/CASP3/CASP7/CCL20/CCL5/CSF1/CXCL1/CXCL10/CXCL3/CXCL5/CXCL6/EDN1/FADD/ICAM1/IL15/IL18R1/IL1B/IL6/LIF/MAP2K1/MAP2K6/MAPK9/MMP9/NFKB1/SELE/TNF/TNFRSF1A/TNFRSF1B/VEGFC
Immune disease	FEV1	Rheumatoid arthritis	Downregulated	31	4.36e-09	ACP5/ANGPT1/ATP6V1F/ATP6V1G1/CCL20/CCL3/CCL5/CD80/CSF1/CTSL/CXCL1/CXCL3/CXCL5/CXCL6/CXCL8/ICAM1/IFNG/IL15/IL17A/IL18/IL1B/IL6/ITGAL/ITGB2/MMP1/PTH/TGFB1/TNF/TNFRSF11A/TNFSF13B/VEGFA
Immune disease	FVC	Rheumatoid arthritis	Downregulated	31	2.68e-08	ACP5/ANGPT1/ATP6V1F/ATP6V1G1/CCL20/CCL3/CCL5/CD80/CD86/CSF1/CTSL/CXCL1/CXCL3/CXCL5/CXCL6/CXCL8/ICAM1/IL15/IL17A/IL18/IL1B/IL6/ITGAL/ITGB2/MMP1/PTH/TGFB1/TNF/TNFRSF11A/TNFSF13B/VEGFA
Infectious disease: bacterial	FEV1	Pertussis	Downregulated	25	2.07e-07	C1R/C1S/C2/C3/C5/CASP1/CASP3/CASP7/CD14/CXCL5/CXCL6/CXCL8/IL1B/IL6/IRAK1/IRAK4/ITGA5/ITGAM/ITGB2/LY96/MAPK9/NFKB1/NOS2/SERPING1/TNF
Immune system	PEF	Complement and coagulation cascades	Downregulated	22	1.71e-12	C1R/C1S/C2/C3/C7/C9/CFB/CFD/CFH/CFHR5/CFI/F10/F7/F9/FGA/PLAT/PLAUR/SERPIND1/SERPINE1/SERPING1/TFPI/VSIG4
Immune system	PEF	Chemokine signaling pathway	Downregulated	22	6.93e-06	CCL11/CCL14/CCL15/CCL16/CCL17/CCL18/CCL19/CCL20/CCL21/CCL22/CCL25/CCL28/CCL3/CCL5/CCL7/CCL8/CXCL10/CXCL11/CXCL13/CXCL16/CXCL5/CXCL9
Infectious disease: parasitic	FEV1	Malaria	Downregulated	21	2.24e-08	CD36/CD40/CD40LG/CSF3/CXCL8/HGF/ICAM1/IFNG/IL18/IL1B/IL6/ITGAL/ITGB2/PECAM1/SDC1/SELE/SELP/TGFB1/THBS2/THBS4/TNF
Infectious disease: parasitic	FVC	Malaria	Downregulated	21	6.38e-08	CD36/CD40/CD40LG/CR1/CSF3/CXCL8/HGF/ICAM1/IL18/IL1B/IL6/ITGAL/ITGB2/PECAM1/SDC1/SELE/SELP/TGFB1/THBS2/THBS4/TNF
Transport and catabolism	PEF	Lysosome	Downregulated	20	2.79e-07	ACP5/ARSA/ARSB/CTSD/CTSO/CTSS/CTSZ/FUCA1/GLA/GM2A/GUSB/HYAL1/IDUA/IGF2R/LGMN/NPC2/PLA2G15/SCARB2/SMPD1/TPP1
Immune disease	PEF	Rheumatoid arthritis	Downregulated	17	2.79e-07	ACP5/CCL20/CCL3/CCL5/CD80/CSF1/CXCL5/ICAM1/IFNG/IL15/IL18/IL6/PTH/TNF/TNFRSF11A/TNFSF13B/VEGFA
Signal transduction	FVC	PI3K-Akt signaling pathway	Upregulated	15	0.000102	CHAD/COL4A1/COL9A1/FASLG/FGFR4/FLT3/GH1/IL7R/ITGA11/ITGAV/ITGB6/KIT/KITLG/MET/VEGFD
Signal transduction	PEF	TNF signaling pathway	Downregulated	15	0.0001284	CCL20/CCL5/CSF1/CXCL10/CXCL5/EDN1/ICAM1/IL15/IL18R1/IL6/MMP9/SELE/TNF/TNFRSF1A/TNFRSF1B
Signal transduction	FEV1	PI3K-Akt signaling pathway	Upregulated	13	0.0007288	CHAD/COL9A1/FASLG/FLT3/GH1/IL7R/ITGA11/ITGAV/ITGB6/KIT/KITLG/MET/VEGFD
Signal transduction	PEF	NF-kappa B signaling pathway	Downregulated	13	0.0006076	CCL19/CCL21/CD14/CD40/EDA2R/ICAM1/LBP/LY96/TNF/TNFRSF11A/TNFRSF1A/TNFSF13B/TNFSF14
Cell motility	FVC	Cytoskeleton in muscle cells	Upregulated	12	0.000102	COL4A1/COL9A1/DCN/DSG2/ITGA11/ITGAV/ITGB6/MYBPC1/MYL3/MYOM2/MYOM3/VCAN
Signaling molecules and interaction	FEV1	Cell adhesion molecules	Upregulated	11	1.77e-05	CD34/CD58/CDH3/CDH5/CNTN1/ICOSLG/ITGAV/NCAM2/PTPRS/SELL/SLITRK6
Signaling molecules and interaction	FVC	Cell adhesion molecules	Upregulated	11	5.96e-05	CD34/CD58/CDH3/CDH5/ICOSLG/ITGAV/NCAM2/PTPRS/SELL/SLITRK6/VCAN
Immune system	PEF	Intestinal immune network for IgA production	Downregulated	10	8.75e-05	CCL25/CCL28/CD40/CD80/IL15/IL6/PIGR/TNFRSF13B/TNFRSF17/TNFSF13B
Infectious disease: parasitic	PEF	Malaria	Downregulated	10	8.75e-05	CD40/CSF3/HGF/ICAM1/IFNG/IL18/IL6/SELE/THBS2/TNF
Signal transduction	FVC	MAPK signaling pathway	Upregulated	9	0.0550494	CACNA1H/FASLG/FGFR4/FLT3/IL1RAP/KIT/KITLG/MET/VEGFD
Cell motility	FEV1	Cytoskeleton in muscle cells	Upregulated	8	0.0377247	COL9A1/DCN/DSG2/ITGA11/ITGAV/ITGB6/MYL3/MYOM3
Signaling molecules and interaction	FEV1	Cytokine-cytokine receptor interaction	Upregulated	8	0.083716	CX3CL1/FASLG/GH1/IFNGR1/IL17RB/IL1RAP/IL1RL2/IL7R
Signal transduction	FEV1	MAPK signaling pathway	Upregulated	8	0.083716	CACNA1H/FASLG/FLT3/IL1RAP/KIT/KITLG/MET/VEGFD
Signaling molecules and interaction	FVC	ECM-receptor interaction	Upregulated	8	0.000102	CHAD/COL4A1/COL9A1/DMP1/ITGA11/ITGAV/ITGB6/MEPE
Cellular community - eukaryotes	FVC	Focal adhesion	Upregulated	8	0.019677	CHAD/COL4A1/COL9A1/ITGA11/ITGAV/ITGB6/MET/VEGFD
Signaling molecules and interaction	FEV1	ECM-receptor interaction	Upregulated	7	0.0007288	CHAD/COL9A1/DMP1/ITGA11/ITGAV/ITGB6/MEPE
Cellular community - eukaryotes	FEV1	Focal adhesion	Upregulated	7	0.053184	CHAD/COL9A1/ITGA11/ITGAV/ITGB6/MET/VEGFD
Immune system	FVC	Hematopoietic cell lineage	Upregulated	7	0.0017713	CD1C/CD34/CD55/FLT3/IL7R/KIT/KITLG
Immune system	FEV1	Hematopoietic cell lineage	Upregulated	5	0.053184	CD34/FLT3/IL7R/KIT/KITLG
Signal transduction	PEF	MAPK signaling pathway	Upregulated	5	0.0985758	EGFR/KIT/KITLG/MET/TRAF2
Signal transduction	PEF	PI3K-Akt signaling pathway	Upregulated	5	0.110172	EGFR/ITGB6/KIT/KITLG/MET
Cancer: overview	FEV1	Central carbon metabolism in cancer	Upregulated	4	0.0796803	FLT3/KIT/MET/NTRK3
Cardiovascular disease	FEV1	Arrhythmogenic right ventricular cardiomyopathy	Upregulated	4	0.110448	DSG2/ITGA11/ITGAV/ITGB6
Cancer: overview	FVC	Central carbon metabolism in cancer	Upregulated	4	0.0953141	FLT3/KIT/MET/NTRK3
Endocrine system	FVC	PPAR signaling pathway	Upregulated	4	0.109154	ADIPOQ/APOA2/LPL/PLTP
Cancer: overview	PEF	Central carbon metabolism in cancer	Upregulated	4	0.0087368	EGFR/KIT/MET/NTRK3
Signal transduction	PEF	Rap1 signaling pathway	Upregulated	4	0.107095	EGFR/KIT/KITLG/MET
Signal transduction	PEF	Ras signaling pathway	Upregulated	4	0.114962	EGFR/KIT/KITLG/MET
Energy metabolism	FVC	Nitrogen metabolism	Upregulated	3	0.0157401	CA12/CA14/CA4
Immune system	PEF	Hematopoietic cell lineage	Upregulated	3	0.107095	CD34/KIT/KITLG
Signal transduction	PEF	Phospholipase D signaling pathway	Upregulated	3	0.175119	EGFR/KIT/KITLG
Signaling molecules and interaction	PEF	Cell adhesion molecules	Upregulated	3	0.182213	CD34/CNTN1/NCAM2
Development and regeneration	PEF	Axon guidance	Upregulated	3	0.200478	MET/RGMA/ROBO2
Energy metabolism	PEF	Nitrogen metabolism	Upregulated	2	0.0773075	CA14/CA6
