# Supplementary material for: Lung function, proteomic signatures, and risk of metabolic dysfunction-associated steatotic liver disease
Source: Research Square preprint supplement (doi:10.21203/rs.3.rs-6381296/v1), 2025-04-08
Supplement: Supplementary file 10 [file c5cb3e35d1d75b3952b03a24.xlsx]

## Sheet: Table S2
Table S2. Map of the proteins included in the present study
Olink ID	Assay Target	Protein panel	Gene symbol	UniProt	Gene CHROM	Gene start	Gene end	Protein full name
OID30771	A1BG	Inflammation_II	A1BG	P04217	19	58345178	58353492	Alpha-1B-glycoprotein
OID30236	AAMDC	Cardiometabolic_II	AAMDC	Q9H7C9	11	77821109	77918432	Mth938 domain-containing protein
OID21311	AARSD1	Oncology	AARSD1	Q9BTE6	17	42950526	42964498	Alanyl-tRNA editing protein Aarsd1
OID30146	ABCA2	Cardiometabolic_II	ABCA2	Q9BZC7	9	137007234	137028915	ATP-binding cassette sub-family A member 2
OID20921	ABHD14B	Neurology	ABHD14B	Q96IU4	3	51968510	51983409	Protein ABHD14B
OID21280	ABL1	Oncology	ABL1	P00519	9	130713016	130887675	Tyrosine-protein kinase ABL1
OID30675	ABO	Inflammation_II	ABO	P16442	9	133233278	133276024	Histo-blood group ABO system transferase
OID30130	ABRAXAS2	Cardiometabolic_II	ABRAXAS2	Q15018	10	124801819	124836667	BRISC complex subunit Abraxas 2
OID21269	ACAA1	Oncology	ACAA1	P09110	3	38103129	38137242	3-ketoacyl-CoA thiolase, peroxisomal
OID31277	ACADM	Oncology_II	ACADM	P11310	1	75724431	75787575	Medium-chain specific acyl-CoA dehydrogenase, mitochondrial
OID30356	ACADSB	Cardiometabolic_II	ACADSB	P45954	10	123008979	123058290	Short/branched chain specific acyl-CoA dehydrogenase, mitochondrial
OID20159	ACAN	Cardiometabolic	ACAN	P16112	15	88803436	88875353	Aggrecan core protein
OID30696	ACE	Inflammation_II	ACE	P12821	17	63477061	63498380	Angiotensin-converting enzyme
OID20105	ACE2	Cardiometabolic	ACE2	Q9BYF1	X	15494566	15607236	Angiotensin-converting enzyme 2
OID30585	ACHE	Inflammation_II	ACHE	P22303	7	100889994	100896974	Acetylcholinesterase
OID31522	ACOT13	Oncology_II	ACOT13	Q9NPJ3	6	24667035	24705065	Acyl-coenzyme A thioesterase 13
OID20124	ACOX1	Cardiometabolic	ACOX1	Q15067	17	75941507	75979177	Peroxisomal acyl-coenzyme A oxidase 1
OID30524	ACP1	Inflammation_II	ACP1	P24666	2	264140	278283	Low molecular weight phosphotyrosine protein phosphatase
OID20314	ACP5	Cardiometabolic	ACP5	P13686	19	11574660	11579008	Tartrate-resistant acid phosphatase type 5
OID21432	ACP6	Oncology	ACP6	Q9NPH0	1	147629652	147670524	Lysophosphatidic acid phosphatase type 6
OID31385	ACRBP	Oncology_II	ACRBP	Q8NEB7	12	6638075	6647433	Acrosin-binding protein
OID30513	ACRV1	Inflammation_II	ACRV1	P26436	11	125671522	125680874	Acrosomal protein SP-10
OID30080	ACSL1	Cardiometabolic_II	ACSL1	P33121	4	184755595	184826818	Long-chain-fatty-acid--CoA ligase 1
OID20079	ACTA2	Cardiometabolic	ACTA2	P62736	10	88935074	88991339	Actin, aortic smooth muscle
OID30192	ACTN2	Cardiometabolic_II	ACTN2	P35609	1	236664141	236764631	Alpha-actinin-2
OID20435	ACTN4	Inflammation	ACTN4	O43707	19	38647649	38731589	Alpha-actinin-4
OID20999	ACVRL1	Neurology	ACVRL1	P37023	12	51906908	51923361	Serine/threonine-protein kinase receptor R3
OID20137	ACY1	Cardiometabolic	ACY1	Q03154	3	51983340	51989197	Aminoacylase-1
OID30086	ACY3	Cardiometabolic_II	ACY3	Q96HD9	11	67642555	67650730	N-acyl-aromatic-L-amino acid amidohydrolase
OID30642	ACYP1	Inflammation_II	ACYP1	P07311	14	75053237	75069483	Acylphosphatase-1
OID20645	ADA	Inflammation	ADA	P00813	20	44619522	44652233	Adenosine deaminase
OID20394	ADA2	Cardiometabolic	ADA2	Q9NZK5	22	17178790	17258235	Adenosine deaminase 2
OID30491	ADAM12	Inflammation_II	ADAM12	O43184	10	126012381	126388477	Disintegrin and metalloproteinase domain-containing protein 12
OID20109	ADAM15	Cardiometabolic	ADAM15	Q13444	1	155050566	155062775	Disintegrin and metalloproteinase domain-containing protein 15
OID21001	ADAM22	Neurology	ADAM22	Q9P0K1	7	87934143	88202889	Disintegrin and metalloproteinase domain-containing protein 22
OID20651	ADAM23	Inflammation	ADAM23	O75077	2	206443532	206621127	Disintegrin and metalloproteinase domain-containing protein 23
OID21039	ADAM8	Neurology	ADAM8	P78325	10	133262420	133276868	Disintegrin and metalloproteinase domain-containing protein 8
OID31488	ADAM9	Oncology_II	ADAM9	Q13443	8	38996754	39105445	Disintegrin and metalloproteinase domain-containing protein 9
OID30528	ADAMTS1	Inflammation_II	ADAMTS1	Q9UHI8	21	26835755	26845409	A disintegrin and metalloproteinase with thrombospondin motifs 1
OID20249	ADAMTS13	Cardiometabolic	ADAMTS13	Q76LX8	9	133414358	133459402	A disintegrin and metalloproteinase with thrombospondin motifs 13
OID21275	ADAMTS15	Oncology	ADAMTS15	Q8TE58	11	130448645	130476645	A disintegrin and metalloproteinase with thrombospondin motifs 15
OID20089	ADAMTS16	Cardiometabolic	ADAMTS16	Q8TE57	5	5140330	5320304	A disintegrin and metalloproteinase with thrombospondin motifs 16
OID30471	ADAMTS4	Inflammation_II	ADAMTS4	O75173	1	161184302	161199054	A disintegrin and metalloproteinase with thrombospondin motifs 4
OID21502	ADAMTS8	Oncology	ADAMTS8	Q9UP79	11	130404923	130428609	A disintegrin and metalloproteinase with thrombospondin motifs 8
OID30370	ADAMTSL2	Cardiometabolic_II	ADAMTSL2	Q86TH1	9	133532164	133575519	ADAMTS-like protein 2
OID30275	ADAMTSL4	Cardiometabolic_II	ADAMTSL4	Q6UY14	1	150549369	150560937	ADAMTS-like protein 4
OID30355	ADAMTSL5	Cardiometabolic_II	ADAMTSL5	Q6ZMM2	19	1505022	1513604	ADAMTS-like protein 5
OID21188	ADCYAP1R1	Oncology	ADCYAP1R1	P41586	7	31052308	31111479	Pituitary adenylate cyclase-activating polypeptide type I receptor
OID30655	ADD1	Inflammation_II	ADD1	P35611	4	2843844	2930076	Alpha-adducin
OID20974	ADGRB3	Neurology	ADGRB3	O60242	6	68635282	69390571	Adhesion G protein-coupled receptor B3
OID30588	ADGRD1	Inflammation_II	ADGRD1	Q6QNK2	12	130953907	131141469	Adhesion G-protein coupled receptor D1
OID31483	ADGRE1	Oncology_II	ADGRE1	Q14246	19	6887566	6940459	Adhesion G protein-coupled receptor E1
OID20755	ADGRE2	Inflammation	ADGRE2	Q9UHX3	19	14732392	14778560	Adhesion G protein-coupled receptor E2
OID20260	ADGRE5	Cardiometabolic	ADGRE5	P48960	19	14380501	14408725	Adhesion G protein-coupled receptor E5
OID30349	ADGRF5	Cardiometabolic_II	ADGRF5	Q8IZF2	6	46852522	46954943	Adhesion G protein-coupled receptor F5
OID21294	ADGRG1	Oncology	ADGRG1	Q9Y653	16	57610652	57665580	Adhesion G-protein coupled receptor G1
OID20189	ADGRG2	Cardiometabolic	ADGRG2	Q8IZP9	X	18989307	19122637	Adhesion G-protein coupled receptor G2
OID30877	ADGRV1	Neurology_II	ADGRV1	Q8WXG9	5	90529344	91164437	Adhesion G-protein coupled receptor V1
OID30612	ADH1B	Inflammation_II	ADH1B	P00325	4	99304971	99352760	All-trans-retinol dehydrogenase
OID20117	ADH4	Cardiometabolic	ADH4	P08319	4	99123657	99157792	All-trans-retinol dehydrogenase [NAD(+)] ADH4
OID30748	ADIPOQ	Inflammation_II	ADIPOQ	Q15848	3	186842704	186858463	Adiponectin
OID21467	ADM	Oncology	ADM	P35318	11	10305073	10307397	Pro-adrenomedullin
OID30067	ADRA2A	Cardiometabolic_II	ADRA2A	P08913	10	111077029	111080907	Alpha-2A adrenergic receptor
OID30569	AFAP1	Inflammation_II	AFAP1	Q8N556	4	7758714	7939926	Actin filament-associated protein 1
OID30741	AFM	Inflammation_II	AFM	P43652	4	73481745	73504001	Afamin
OID20978	AFP	Neurology	AFP	P02771	4	73431138	73456174	Alpha-fetoprotein
OID30793	AGBL2	Neurology_II	AGBL2	Q5U5Z8	11	47659591	47715389	Cytosolic carboxypeptidase 2
OID20756	AGER	Inflammation	AGER	Q15109	6	32180968	32184322	Advanced glycosylation end product-specific receptor
OID20896	AGR2	Neurology	AGR2	O95994	7	16791811	16833433	Anterior gradient protein 2 homolog
OID21243	AGR3	Oncology	AGR3	Q8TD06	7	16859412	16881987	Anterior gradient protein 3
OID20786	AGRN	Inflammation	AGRN	O00468	1	1020120	1056118	Agrin
OID20658	AGRP	Inflammation	AGRP	O00253	16	67482571	67483547	Agouti-related protein
OID30709	AGT	Inflammation_II	AGT	P01019	1	230690776	230745576	Angiotensinogen
OID20139	AGXT	Cardiometabolic	AGXT	P21549	2	240868824	240880502	Serine--pyruvate aminotransferase
OID20199	AHCY	Cardiometabolic	AHCY	P23526	20	34280268	34311802	Adenosylhomocysteinase
OID30260	AHNAK	Cardiometabolic_II	AHNAK	Q09666	11	62433542	62556235	Neuroblast differentiation-associated protein AHNAK
OID30244	AHNAK2	Cardiometabolic_II	AHNAK2	Q8IVF2	14	104937244	104978374	Protein AHNAK2
OID31379	AHSA1	Oncology_II	AHSA1	O95433	14	77457870	77469472	Activator of 90 kDa heat shock protein ATPase homolog 1
OID30706	AHSG	Inflammation_II	AHSG	P02765	3	186613060	186621318	Alpha-2-HS-glycoprotein
OID21078	AHSP	Neurology	AHSP	Q9NZD4	16	31527900	31528803	Alpha-hemoglobin-stabilizing protein
OID30956	AIDA	Neurology_II	AIDA	Q96BJ3	1	222668013	222713210	Axin interactor, dorsalization-associated protein
OID21234	AIF1	Oncology	AIF1	P55008	6	31615217	31617021	Allograft inflammatory factor 1
OID30204	AIF1L	Cardiometabolic_II	AIF1L	Q9BQI0	9	131096476	131123152	Allograft inflammatory factor 1-like
OID21287	AIFM1	Oncology	AIFM1	O95831	X	130124666	130165879	Apoptosis-inducing factor 1, mitochondrial
OID20122	AK1	Cardiometabolic	AK1	P00568	9	127866486	127877675	Adenylate kinase isoenzyme 1
OID31142	AK2	Neurology_II	AK2	P54819	1	33007986	33080996	Adenylate kinase 2, mitochondrial
OID30571	AKAP12	Inflammation_II	AKAP12	Q02952	6	151239967	151358559	A-kinase anchor protein 12
OID21244	AKR1B1	Oncology	AKR1B1	P15121	7	134442356	134459284	Aldo-keto reductase family 1 member B1
OID30955	AKR1B10	Neurology_II	AKR1B10	O60218	7	134527567	134541412	Aldo-keto reductase family 1 member B10
OID20062	AKR1C4	Cardiometabolic	AKR1C4	P17516	10	5195462	5218949	Aldo-keto reductase family 1 member C4
OID30488	AKR7L	Inflammation_II	AKR7L	Q8NHP1	1	19265982	19274194	Aflatoxin B1 aldehyde reductase member 4
OID20895	AKT1S1	Neurology	AKT1S1	Q96B36	19	49869033	49878459	Proline-rich AKT1 substrate 1
OID31052	AKT2	Neurology_II	AKT2	P31751	19	40230317	40285536	RAC-beta serine/threonine-protein kinase
OID21197	AKT3	Oncology	AKT3	Q9Y243	1	243488233	243851079	RAC-gamma serine/threonine-protein kinase
OID20273	ALCAM	Cardiometabolic	ALCAM	Q13740	3	105366909	105576900	CD166 antigen
OID21128	ALDH1A1	Neurology	ALDH1A1	P00352	9	72900671	73080442	Retinal dehydrogenase 1
OID31380	ALDH2	Oncology_II	ALDH2	P05091	12	111766887	111817532	Aldehyde dehydrogenase, mitochondrial
OID20512	ALDH3A1	Inflammation	ALDH3A1	P30838	17	19737984	19748943	Aldehyde dehydrogenase, dimeric NADP-preferring
OID31047	ALDH5A1	Neurology_II	ALDH5A1	P51649	6	24494867	24537207	Succinate-semialdehyde dehydrogenase, mitochondrial
OID31275	ALMS1	Oncology_II	ALMS1	Q8TCU4	2	73385758	73625166	Alstrom syndrome protein 1
OID30497	ALPI	Inflammation_II	ALPI	P09923	2	232456125	232460753	Intestinal-type alkaline phosphatase
OID21383	ALPP	Oncology	ALPP	P05187	2	232378724	232382889	Alkaline phosphatase, placental type
OID20437	AMBN	Inflammation	AMBN	Q9NP70	4	70592256	70607288	Ameloblastin
OID21413	AMBP	Oncology	AMBP	P02760	9	114060127	114078328	Protein AMBP
OID30366	AMDHD2	Cardiometabolic_II	AMDHD2	Q9Y303	16	2520357	2531422	N-acetylglucosamine-6-phosphate deacetylase
OID20806	AMFR	Neurology	AMFR	Q9UKV5	16	56361452	56425545	E3 ubiquitin-protein ligase AMFR
OID30881	AMIGO1	Neurology_II	AMIGO1	Q86WK6	1	109504178	109509738	Amphoterin-induced protein 1
OID21370	AMIGO2	Oncology	AMIGO2	Q86SJ2	12	47075707	47079959	Amphoterin-induced protein 2
OID20492	AMN	Inflammation	AMN	Q9BXJ7	14	102922663	102933596	Protein amnionless
OID30572	AMOT	Inflammation_II	AMOT	Q4VCS5	X	112774503	112840831	Angiomotin
OID31351	AMOTL2	Oncology_II	AMOTL2	Q9Y2J4	3	134355347	134375479	Angiomotin-like protein 2
OID31139	AMPD3	Neurology_II	AMPD3	Q01432	11	10308313	10507579	AMP deaminase 3
OID30707	AMY1A_AMY1B_AMY1C	Inflammation_II	AMY1A;AMY1B;AMY1C	P0DUB6;P0DTE7;P0DTE8	1;1;1	103655760;103687415;103745323	103664554;103696454;103758726	Alpha-amylase 1A_Alpha-amylase 1B_Alpha-amylase 1C
OID20333	AMY2A	Cardiometabolic	AMY2A	P04746	1	103617427	103625780	Pancreatic alpha-amylase
OID20340	AMY2B	Cardiometabolic	AMY2B	P19961	1	103553815	103579534	Alpha-amylase 2B
OID20403	ANG	Cardiometabolic	ANG	P03950	14	20684177	20698971	Angiogenin
OID20740	ANGPT1	Inflammation	ANGPT1	Q15389	8	107249482	107498055	Angiopoietin-1
OID21463	ANGPT2	Oncology	ANGPT2	O15123	8	6499632	6563409	Angiopoietin-2
OID20211	ANGPTL1	Cardiometabolic	ANGPTL1	O95841	1	178849535	178871077	Angiopoietin-related protein 1
OID20726	ANGPTL2	Inflammation	ANGPTL2	Q9UKU9	9	127087348	127122635	Angiopoietin-related protein 2
OID20407	ANGPTL3	Cardiometabolic	ANGPTL3	Q9Y5C1	1	62597520	62606313	Angiopoietin-related protein 3
OID20703	ANGPTL4	Inflammation	ANGPTL4	Q9BY76	19	8363289	8374370	Angiopoietin-related protein 4
OID21412	ANGPTL7	Oncology	ANGPTL7	O43827	1	11189355	11195981	Angiopoietin-related protein 7
OID30161	ANK2	Cardiometabolic_II	ANK2	Q01484	4	112818032	113384221	Ankyrin-2
OID30518	ANKMY2	Inflammation_II	ANKMY2	Q8IV38	7	16599779	16645817	Ankyrin repeat and MYND domain-containing protein 2
OID31173	ANKRA2	Oncology_II	ANKRA2	Q9H9E1	5	73552190	73565667	Ankyrin repeat family A protein 2
OID21162	ANKRD54	Oncology	ANKRD54	Q6NXT1	22	37830855	37849327	Ankyrin repeat domain-containing protein 54
OID30203	ANP32C	Cardiometabolic_II	ANP32C	O43423	4	164197007	16419771	Acidic leucine-rich nuclear phosphoprotein 32 family member C
OID20350	ANPEP	Cardiometabolic	ANPEP	P15144	15	89784895	89815401	Aminopeptidase N
OID30617	ANXA1	Inflammation_II	ANXA1	P04083	9	73151865	73170393	Annexin A1
OID20886	ANXA10	Neurology	ANXA10	Q9UJ72	4	168092537	168187736	Annexin A10
OID20583	ANXA11	Inflammation	ANXA11	P50995	10	80150889	80205572	Annexin A11
OID30263	ANXA2	Cardiometabolic_II	ANXA2	P07355	15	60347134	60402883	Annexin A2
OID21036	ANXA3	Neurology	ANXA3	P12429	4	78551747	78610451	Annexin A3
OID20123	ANXA4	Cardiometabolic	ANXA4	P09525	2	69644425	69827112	Annexin A4
OID20810	ANXA5	Neurology	ANXA5	P08758	4	121667946	121696995	Annexin A5
OID20452	AOC1	Inflammation	AOC1	P19801	7	150824627	150861504	Amiloride-sensitive amine oxidase [copper-containing]
OID20389	AOC3	Cardiometabolic	AOC3	Q16853	17	42851184	42858130	Membrane primary amine oxidase
OID31348	AP1G2	Oncology_II	AP1G2	O75843	14	23559565	23568070	AP-1 complex subunit gamma-like 2
OID30949	AP2B1	Neurology_II	AP2B1	P63010	17	35578046	35726413	AP-2 complex subunit beta
OID31478	AP3B1	Oncology_II	AP3B1	O00203	5	78000522	78294762	AP-3 complex subunit beta-1
OID31117	AP3S2	Neurology_II	AP3S2	P59780	15	89830599	89894638	AP-3 complex subunit sigma-2
OID21359	APBB1IP	Oncology	APBB1IP	Q7Z5R6	10	26438341	26567803	Amyloid beta A4 precursor protein-binding family B member 1-interacting protein
OID30778	APCS	Inflammation_II	APCS	P02743	1	159587826	159588865	Serum amyloid P-component
OID21434	APEX1	Oncology	APEX1	P27695	14	20455191	20457772	DNA-(apurinic or apyrimidinic site) endonuclease
OID20164	APLP1	Cardiometabolic	APLP1	P51693	19	35867899	35879792	Amyloid-like protein 1
OID30769	APOA1	Inflammation_II	APOA1	P02647	11	116835751	116837622	Apolipoprotein A-I
OID30686	APOA2	Inflammation_II	APOA2	P02652	1	161222292	161223631	Apolipoprotein A-II
OID30733	APOA4	Inflammation_II	APOA4	P06727	11	116820700	116823304	Apolipoprotein A-IV
OID30673	APOB	Inflammation_II	APOB	P04114	2	21001429	21044073	Apolipoprotein B-100
OID30246	APOBR	Cardiometabolic_II	APOBR	Q0VD83	16	28494643	28498964	Apolipoprotein B receptor
OID30749	APOC1	Inflammation_II	APOC1	P02654	19	44914247	44919349	Apolipoprotein C-I
OID30746	APOD	Inflammation_II	APOD	P05090	3	195568705	195584033	Apolipoprotein D
OID30727	APOE	Inflammation_II	APOE	P02649	19	44905791	44909393	Apolipoprotein E
OID30701	APOF	Inflammation_II	APOF	Q13790	12	56360568	56362857	Apolipoprotein F
OID21072	APOH	Neurology	APOH	P02749	17	66212033	66256525	Beta-2-glycoprotein 1
OID30708	APOL1	Inflammation_II	APOL1	O14791	22	36253071	36267530	Apolipoprotein L1
OID20374	APOM	Cardiometabolic	APOM	O95445	6	31652416	31658210	Apolipoprotein M
OID21070	APP	Neurology	APP	P05067	21	25880550	26171128	Amyloid-beta precursor protein
OID30590	APPL2	Inflammation_II	APPL2	Q8NEU8	12	105173297	105236203	DCC-interacting protein 13-beta
OID20927	APRT	Neurology	APRT	P07741	16	88809339	88811937	Adenine phosphoribosyltransferase
OID31260	ARAF	Oncology_II	ARAF	P10398	X	47561205	47571908	Serine/threonine-protein kinase A-Raf
OID21357	AREG	Oncology	AREG	P15514	4	74445136	74455005	Amphiregulin
OID31523	ARF6	Oncology_II	ARF6	P62330	14	49893079	49897054	ADP-ribosylation factor 6
OID31024	ARFIP1	Neurology_II	ARFIP1	P53367	4	152779937	152918463	Arfaptin-1
OID21445	ARG1	Oncology	ARG1	P05089	6	131470832	131584332	Arginase-1
OID31339	ARG2	Oncology_II	ARG2	P78540	14	67619920	67651708	Arginase-2, mitochondrial
OID21202	ARHGAP1	Oncology	ARHGAP1	Q07960	11	46677080	46700619	Rho GTPase-activating protein 1
OID21255	ARHGAP25	Oncology	ARHGAP25	P42331	2	68679601	68826833	Rho GTPase-activating protein 25
OID31336	ARHGAP30	Oncology_II	ARHGAP30	Q7Z6I6	1	161046946	161069970	Rho GTPase-activating protein 30
OID30653	ARHGAP45	Inflammation_II	ARHGAP45	Q92619	19	1065923	1086628	Rho GTPase-activating protein 45
OID31190	ARHGAP5	Oncology_II	ARHGAP5	Q13017	14	32076114	32159728	Rho GTPase-activating protein 5
OID31133	ARHGEF1	Neurology_II	ARHGEF1	Q92888	19	41883173	41930150	Rho guanine nucleotide exchange factor 1
OID30994	ARHGEF10	Neurology_II	ARHGEF10	O15013	8	1823926	1958641	Rho guanine nucleotide exchange factor 10
OID20554	ARHGEF12	Inflammation	ARHGEF12	Q9NZN5	11	120336413	120489937	Rho guanine nucleotide exchange factor 12
OID30871	ARHGEF5	Neurology_II	ARHGEF5	Q12774	7	144355288	144380632	Rho guanine nucleotide exchange factor 5
OID30861	ARID3A	Neurology_II	ARID3A	Q99856	19	925781	975939	AT-rich interactive domain-containing protein 3A
OID20803	ARID4B	Neurology	ARID4B	Q4LE39	1	235131634	235328219	AT-rich interactive domain-containing protein 4B
OID30166	ARL13B	Cardiometabolic_II	ARL13B	Q3SXY8	3	93980139	94055678	ADP-ribosylation factor-like protein 13B
OID30121	ARL2BP	Cardiometabolic_II	ARL2BP	Q9Y2Y0	16	57245259	57253635	ADP-ribosylation factor-like protein 2-binding protein
OID30792	ARMCX2	Neurology_II	ARMCX2	Q7L311	X	101655281	101659850	Armadillo repeat-containing X-linked protein 2
OID20432	ARNT	Inflammation	ARNT	P27540	1	150809713	150876708	Aryl hydrocarbon receptor nuclear translocator
OID30168	ARNTL	Cardiometabolic_II	ARNTL	O00327	11	13276652	13387266	Aryl hydrocarbon receptor nuclear translocator-like protein 1
OID21138	ARSA	Neurology	ARSA	P15289	22	50622754	50628173	Arylsulfatase A
OID21331	ARSB	Oncology	ARSB	P15848	5	78777209	78986087	Arylsulfatase B
OID20346	ART3	Cardiometabolic	ART3	Q13508	4	76011184	76112802	Ecto-ADP-ribosyltransferase 3
OID30828	ART5	Neurology_II	ART5	Q96L15	11	3638512	3642316	Ecto-ADP-ribosyltransferase 5
OID20446	ARTN	Inflammation	ARTN	Q5T4W7	1	43933320	43937240	Artemin
OID30415	ASAH1	Cardiometabolic_II	ASAH1	Q13510	8	18055992	18084998	Acid ceramidase
OID20996	ASAH2	Neurology	ASAH2	Q9NR71	10	50182778	50279720	Neutral ceramidase
OID20990	ASGR1	Neurology	ASGR1	P07306	17	7173431	7179564	Asialoglycoprotein receptor 1
OID30679	ASGR2	Inflammation_II	ASGR2	P07307	17	7101322	7115700	Asialoglycoprotein receptor 2
OID30315	ASPN	Cardiometabolic_II	ASPN	Q9BXN1	9	92456205	92482506	Asporin
OID31055	ASPSCR1	Neurology_II	ASPSCR1	Q9BZE9	17	81976807	82017406	Tether containing UBX domain for GLUT4
OID30283	ASRGL1	Cardiometabolic_II	ASRGL1	Q7L266	11	62337448	62393412	Isoaspartyl peptidase/L-asparaginase
OID30170	ASS1	Cardiometabolic_II	ASS1	P00966	9	130444961	130501274	Argininosuccinate synthase
OID20798	ATF2	Neurology	ATF2	P15336	2	175072250	175168382	Cyclic AMP-dependent transcription factor ATF-2
OID31162	ATF4	Oncology_II	ATF4	P18848	22	39519695	39522683	Cyclic AMP-dependent transcription factor ATF-4
OID31466	ATG16L1	Oncology_II	ATG16L1	Q676U5	2	233210051	233295674	Autophagy-related protein 16-1
OID21246	ATG4A	Oncology	ATG4A	Q8WYN0	X	108091668	108154671	Cysteine protease ATG4A
OID21476	ATOX1	Oncology	ATOX1	O00244	5	151742316	151772532	Copper transport protein ATOX1
OID30124	ATP1B1	Cardiometabolic_II	ATP1B1	P05026	1	169105697	169310992	Sodium/potassium-transporting ATPase subunit beta-1
OID30118	ATP1B2	Cardiometabolic_II	ATP1B2	P14415	17	7646627	7657770	Sodium/potassium-transporting ATPase subunit beta-2
OID30065	ATP1B3	Cardiometabolic_II	ATP1B3	P54709	3	141876124	141926549	Sodium/potassium-transporting ATPase subunit beta-3
OID31230	ATP1B4	Oncology_II	ATP1B4	Q9UN42	X	120362085	120383249	Protein ATP1B4
OID30062	ATP2B4	Cardiometabolic_II	ATP2B4	P23634	1	203626832	203744081	Plasma membrane calcium-transporting ATPase 4
OID30079	ATP5F1D	Cardiometabolic_II	ATP5F1D	P30049	19	1241746	1244825	ATP synthase subunit delta, mitochondrial
OID20760	ATP5IF1	Inflammation	ATP5IF1	Q9UII2	1	28236109	28246906	ATPase inhibitor, mitochondrial
OID20811	ATP5PO	Neurology	ATP5PO	P48047	21	33903453	33915814	ATP synthase subunit O, mitochondrial
OID21178	ATP6AP2	Oncology	ATP6AP2	O75787	X	40579372	40606848	Renin receptor
OID21341	ATP6V1D	Oncology	ATP6V1D	Q9Y5K8	14	67294371	67360265	V-type proton ATPase subunit D
OID20843	ATP6V1F	Neurology	ATP6V1F	Q16864	7	128862856	128865847	V-type proton ATPase subunit F
OID30242	ATP6V1G1	Cardiometabolic_II	ATP6V1G1	O75348	9	114587706	114598915	V-type proton ATPase subunit G 1
OID30167	ATP6V1G2	Cardiometabolic_II	ATP6V1G2	O95670	6	31544444	31548427	V-type proton ATPase subunit G 2
OID31451	ATRAID	Oncology_II	ATRAID	Q6UW56	2	27212041	27217178	All-trans retinoic acid-induced differentiation factor
OID30735	ATRN	Inflammation_II	ATRN	O75882	20	3471018	3651118	Attractin, Isoform 2
OID20865	ATXN10	Neurology	ATXN10	Q9UBB4	22	45671798	45845307	Ataxin-10
OID30850	ATXN2	Neurology_II	ATXN2	Q99700	12	111443485	111599676	Ataxin-2
OID30980	ATXN2L	Neurology_II	ATXN2L	Q8WWM7	16	28822999	28837237	Ataxin-2-like protein
OID31149	ATXN3	Neurology_II	ATXN3	P54252	14	92044496	92106621	Ataxin-3
OID20582	AXIN1	Inflammation	AXIN1	O15169	16	287440	352723	Axin-1
OID20363	AXL	Cardiometabolic	AXL	P30530	19	41219223	41261766	Tyrosine-protein kinase receptor UFO
OID31056	AZI2	Neurology_II	AZI2	Q9H6S1	3	28315003	28349050	5-azacytidine-induced protein 2
OID20309	AZU1	Cardiometabolic	AZU1	P20160	19	825097	832018	Azurocidin
OID30725	B2M	Inflammation_II	B2M	P61769	15	44711358	44718851	Beta-2-microglobulin
OID30165	B3GAT3	Cardiometabolic_II	B3GAT3	O94766	11	62615296	62622154	Galactosylgalactosylxylosylprotein 3-beta-glucuronosyltransferase 3
OID30281	B3GNT7	Cardiometabolic_II	B3GNT7	Q8NFL0	2	231395710	231401164	UDP-GlcNAc:betaGal beta-1,3-N-acetylglucosaminyltransferase 7
OID20780	B4GALT1	Inflammation	B4GALT1	P15291	9	33104082	33167356	Beta-1,4-galactosyltransferase 1
OID21127	B4GAT1	Neurology	B4GAT1	O43505	11	66345374	66347629	Beta-1,4-glucuronyltransferase 1
OID30466	BABAM1	Inflammation_II	BABAM1	Q9NWV8	19	17267376	17281249	BRISC and BRCA1-A complex member 1
OID20505	BACH1	Inflammation	BACH1	O14867	21	29194071	29630751	Transcription regulator protein BACH1
OID20972	BAG3	Neurology	BAG3	O95817	10	119651380	119677819	BAG family molecular chaperone regulator 3
OID30474	BAG4	Inflammation_II	BAG4	O95429	8	38176533	38213301	BAG family molecular chaperone regulator 4
OID20114	BAG6	Cardiometabolic	BAG6	P46379	6	31639028	31652705	Large proline-rich protein BAG6
OID21250	BAIAP2	Oncology	BAIAP2	Q9UQB8	17	81035122	81117434	Brain-specific angiogenesis inhibitor 1-associated protein 2
OID21267	BAMBI	Oncology	BAMBI	Q13145	10	28677510	28682932	BMP and activin membrane-bound inhibitor homolog
OID20594	BANK1	Inflammation	BANK1	Q8NDB2	4	101411286	102074812	B-cell scaffold protein with ankyrin repeats
OID31150	BAP18	Neurology_II	C17orf49	Q8IXM2	17	7014495	7017525	Chromatin complexes subunit BAP18
OID30896	BATF	Neurology_II	BATF	Q16520	14	75522455	75546993	Basic leucine zipper transcriptional factor ATF-like
OID20856	BAX	Neurology	BAX	Q07812	19	48954815	48961798	Apoptosis regulator BAX
OID21076	BCAM	Neurology	BCAM	P50895	19	44809071	44821421	Basal cell adhesion molecule
OID20998	BCAN	Neurology	BCAN	Q96GW7	1	156641390	156659532	Brevican core protein
OID30312	BCAT1	Cardiometabolic_II	BCAT1	P54687	12	24810024	24949101	Branched-chain-amino-acid aminotransferase, cytosolic
OID30844	BCAT2	Neurology_II	BCAT2	O15382	19	48795062	48811029	Branched-chain-amino-acid aminotransferase, mitochondrial
OID30717	BCHE	Inflammation_II	BCHE	P06276	3	165772904	165837462	Cholinesterase
OID31454	BCL2	Oncology_II	BCL2	P10415	18	63123346	63320128	Apoptosis regulator Bcl-2
OID31152	BCL2L1	Neurology_II	BCL2L1	Q07817	20	31664452	31723989	Bcl-2-like protein 1
OID20513	BCL2L11	Inflammation	BCL2L11	O43521	2	111119378	111168445	Bcl-2-like protein 11, Isoform BimL
OID30498	BCL2L15	Inflammation_II	BCL2L15	Q5TBC7	1	113876816	113887581	Bcl-2-like protein 15
OID31218	BCL7A	Oncology_II	BCL7A	Q4VC05	12	122019422	122062044	B-cell CLL/lymphoma 7 protein family member A
OID31421	BCL7B	Oncology_II	BCL7B	Q9BQE9	7	73536356	73557690	B-cell CLL/lymphoma 7 protein family member B
OID20558	BCR	Inflammation	BCR	P11274	22	23179704	23318037	Breakpoint cluster region protein
OID30373	BDNF	Cardiometabolic_II	BDNF	P23560	11	27654893	27722058	Brain-derived neurotrophic factor
OID30220	BECN1	Cardiometabolic_II	BECN1	Q14457	17	42810134	42833350	Beclin-1
OID31202	BEX3	Oncology_II	BEX3	Q00994	X	103376395	103378164	Protein BEX3
OID30389	BGLAP	Cardiometabolic_II	BGLAP	P02818	1	156242184	156243317	Osteocalcin
OID21198	BGN	Oncology	BGN	P21810	X	153494980	153509546	Biglycan
OID30873	BHLHE40	Neurology_II	BHLHE40	O14503	3	4979437	4985323	Class E basic helix-loop-helix protein 40
OID30051	BHMT2	Cardiometabolic_II	BHMT2	Q9H2M3	5	79069767	79090069	S-methylmethionine--homocysteine S-methyltransferase BHMT2
OID20517	BID	Inflammation	BID	P55957	22	17734138	17774770	BH3-interacting domain death agonist
OID21067	BIN2	Neurology	BIN2	Q9UBW5	12	51281038	51324668	Bridging integrator 2
OID21217	BIRC2	Oncology	BIRC2	Q13490	11	102347211	102378670	Baculoviral IAP repeat-containing protein 2
OID20336	BLMH	Cardiometabolic	BLMH	Q13867	17	30248203	30292056	Bleomycin hydrolase
OID30541	BLNK	Inflammation_II	BLNK	Q8WV28	10	96189171	96271587	B-cell linker protein
OID30856	BLOC1S2	Neurology_II	BLOC1S2	Q6QNY1	10	100273280	100286680	Biogenesis of lysosome-related organelles complex 1 subunit 2
OID31106	BLOC1S3	Neurology_II	BLOC1S3	Q6QNY0	19	45178784	45216933	Biogenesis of lysosome-related organelles complex 1 subunit 3
OID21141	BLVRB	Neurology	BLVRB	P30043	19	40447765	40465764	Flavin reductase
OID30575	BMP10	Inflammation_II	BMP10	O95393	2	68860909	68871397	Bone morphogenetic protein 10
OID20994	BMP4	Neurology	BMP4	P12644	14	53949736	53958761	Bone morphogenetic protein 4
OID20111	BMP6	Cardiometabolic	BMP6	P22004	6	7726099	7881728	Bone morphogenetic protein 6
OID30615	BMPER	Inflammation_II	BMPER	Q8N8U9	7	33904308	34156427	BMP-binding endothelial regulator protein
OID30292	BNIP2	Cardiometabolic_II	BNIP2	Q12982	15	59659146	59689339	BCL2/adenovirus E1B 19 kDa protein-interacting protein 2
OID30525	BNIP3L	Inflammation_II	BNIP3L	O60238	8	26383054	26505636	BCL2/adenovirus E1B 19 kDa protein-interacting protein 3-like
OID20116	BOC	Cardiometabolic	BOC	Q9BWV1	3	113211003	113287459	Brother of CDO
OID30837	BOLA1	Neurology_II	BOLA1	Q9Y3E2	1	149887890	149900798	BolA-like protein 1
OID30267	BOLA2_BOLA2B	Cardiometabolic_II	BOLA2B;BOLA2	Q9H3K6;Q9H3K6	16;16	30192932;29453590	30194306;29454351	BolA-like protein 2
OID30279	BPIFA2	Cardiometabolic_II	BPIFA2	Q96DR5	20	33161768	33181412	BPI fold-containing family A member 2
OID20308	BPIFB1	Cardiometabolic	BPIFB1	Q8TDL5	20	33273480	33309871	BPI fold-containing family B member 1
OID30311	BPIFB2	Cardiometabolic_II	BPIFB2	Q8N4F0	20	33007704	33023703	BPI fold-containing family B member 2
OID31506	BRAP	Oncology_II	BRAP	Q7Z569	12	111642146	111685956	BRCA1-associated protein
OID31259	BRD1	Oncology_II	BRD1	O95696	22	49773283	49827873	Bromodomain-containing protein 1
OID30826	BRD2	Neurology_II	BRD2	P25440	6	32968594	32981505	Bromodomain-containing protein 2
OID30093	BRD3	Cardiometabolic_II	BRD3	Q15059	9	134030305	134068535	Bromodomain-containing protein 3
OID30179	BRDT	Cardiometabolic_II	BRDT	Q58F21	1	91949343	92014426	Bromodomain testis-specific protein
OID20883	BRK1	Neurology	BRK1	Q8WUW1	3	10115675	10127190	Protein BRICK1
OID30847	BRME1	Neurology_II	BRME1	Q0VDD7	19	13882348	13906452	Break repair meiotic recombinase recruitment factor 1
OID31042	BRSK2	Neurology_II	BRSK2	Q8IWQ3	11	1389899	1462689	Serine/threonine-protein kinase BRSK2
OID20626	BSG	Inflammation	BSG	P35613	19	571277	583494	Basigin
OID31184	BSND	Oncology_II	BSND	Q8WZ55	1	54998933	55017172	Barttin
OID21051	BST1	Neurology	BST1	Q10588	4	15703065	15738313	ADP-ribosyl cyclase/cyclic ADP-ribose hydrolase 2
OID21029	BST2	Neurology	BST2	Q10589	19	17402939	17405630	Bone marrow stromal antigen 2
OID21199	BTC	Oncology	BTC	P35070	4	74744759	74794523	Probetacellulin
OID30754	BTD	Inflammation_II	BTD	P43251	3	15601341	15722311	Biotinidase
OID31237	BTLA	Oncology_II	BTLA	Q7Z6A9	3	112463966	112499472	B- and T-lymphocyte attenuator
OID31363	BTN1A1	Oncology_II	BTN1A1	Q13410	6	26500303	26510425	Butyrophilin subfamily 1 member A1
OID20713	BTN2A1	Inflammation	BTN2A1	Q7KYR7	6	26457904	26476621	Butyrophilin subfamily 2 member A1
OID20540	BTN3A2	Inflammation	BTN3A2	P78410	6	26365159	26378320	Butyrophilin subfamily 3 member A2
OID31196	BTNL10	Oncology_II	BTNL10	A8MVZ5	1	228510425	228512305	Butyrophilin-like protein 10
OID20804	C19orf12	Neurology	C19orf12	Q9NSK7	19	29698937	29715789	Protein C19orf12
OID30180	C1GALT1C1	Cardiometabolic_II	C1GALT1C1	Q96EU7	X	120625674	120630054	C1GALT1-specific chaperone 1
OID20654	C1QA	Inflammation	C1QA	P02745	1	22636628	22639678	Complement C1q subcomponent subunit A
OID31007	C1QBP	Neurology_II	C1QBP	Q07021	17	5432777	5448830	Complement component 1 Q subcomponent-binding protein, mitochondrial
OID30515	C1QL2	Inflammation_II	C1QL2	Q7Z5L3	2	119156243	119158751	Complement C1q-like protein 2
OID20367	C1QTNF1	Cardiometabolic	C1QTNF1	Q9BXJ1	17	79022814	79049788	Complement C1q tumor necrosis factor-related protein 1
OID30618	C1QTNF5	Inflammation_II	C1QTNF5	Q9BXJ0	11	119338942	119340940	Complement C1q tumor necrosis factor-related protein 5
OID31049	C1QTNF6	Neurology_II	C1QTNF6	Q9BXI9	22	37180166	37199385	Complement C1q tumor necrosis factor-related protein 6
OID30620	C1QTNF9	Inflammation_II	C1QTNF9	P0C862	13	24307166	24322535	Complement C1q and tumor necrosis factor-related protein 9A
OID30753	C1R	Inflammation_II	C1R	P00736	12	7080214	7092540	Complement C1r subcomponent
OID30721	C1RL	Inflammation_II	C1RL	Q9NZP8	12	7089587	7109238	Complement C1r subcomponent-like protein
OID30731	C1S	Inflammation_II	C1S	P09871	12	6988259	7071032	Complement C1s subcomponent
OID20410	C2	Cardiometabolic	C2	P06681	6	31897785	31945672	Complement C2
OID20864	C2CD2L	Neurology	C2CD2L	O14523	11	119102198	119118544	Phospholipid transfer protein C2CD2L
OID30883	C2orf69	Neurology_II	C2orf69	Q8N8R5	2	199911293	199955935	UPF0565 protein C2orf69
OID30776	C3	Inflammation_II	C3	P01024	19	6677704	6730562	Complement C3
OID21481	C4BPB	Oncology	C4BPB	P20851	1	207088860	207099993	C4b-binding protein beta chain
OID30744	C5	Inflammation_II	C5	P01031	9	120932987	121075195	Complement C5
OID30766	C7	Inflammation_II	C7	P10643	5	40909492	40984643	Complement component C7
OID31095	C7orf50	Neurology_II	C7orf50	Q9BRJ6	7	996986	1138260	Uncharacterized protein C7orf50
OID30719	C8B	Inflammation_II	C8B	P07358	1	56929207	56974383	Complement component C8 beta chain
OID30698	C9	Inflammation_II	C9	P02748	5	39284140	39371324	Complement component C9
OID31489	C9orf40	Oncology_II	C9orf40	Q8IXQ3	9	74946583	74952912	Uncharacterized protein C9orf40
OID20409	CA1	Cardiometabolic	CA1	P00915	8	85327608	85379014	Carbonic anhydrase 1
OID21195	CA11	Oncology	CA11	O75493	19	48637946	48646187	Carbonic anhydrase-related protein 11
OID21344	CA12	Oncology	CA12	O43570	15	63321378	63381846	Carbonic anhydrase 12
OID20225	CA13	Cardiometabolic	CA13	Q8N1Q1	8	85220587	85284073	Carbonic anhydrase 13
OID21401	CA14	Oncology	CA14	Q9ULX7	1	150257251	150265078	Carbonic anhydrase 14
OID21149	CA2	Neurology	CA2	P00918	8	85463968	85481493	Carbonic anhydrase 2
OID20271	CA3	Cardiometabolic	CA3	P07451	8	85373436	85449040	Carbonic anhydrase 3
OID20241	CA4	Cardiometabolic	CA4	P22748	17	60149942	60170899	Carbonic anhydrase 4
OID20075	CA5A	Cardiometabolic	CA5A	P35218	16	87881546	87936580	Carbonic anhydrase 5A, mitochondrial
OID21096	CA6	Neurology	CA6	P23280	1	8945867	8975092	Carbonic anhydrase 6
OID31265	CA7	Oncology_II	CA7	P43166	16	66844414	66854153	Carbonic anhydrase 7
OID30482	CA8	Inflammation_II	CA8	P35219	8	60185412	60281400	Carbonic anhydrase-related protein
OID21417	CA9	Oncology	CA9	Q16790	9	35673928	35681159	Carbonic anhydrase 9
OID30916	CABP2	Neurology_II	CABP2	Q9NPB3	11	67518912	67524517	Calcium-binding protein 2
OID30840	CACNA1C	Neurology_II	CACNA1C	Q13936	12	1970772	2697950	Voltage-dependent L-type calcium channel subunit alpha-1C
OID30064	CACNA1H	Cardiometabolic_II	CACNA1H	O95180	16	1153106	1221771	Voltage-dependent T-type calcium channel subunit alpha-1H
OID30820	CACNB1	Neurology_II	CACNB1	Q02641	17	39173453	39197702	Voltage-dependent L-type calcium channel subunit beta-1
OID31039	CACNB3	Neurology_II	CACNB3	P54284	12	48813794	48828941	Voltage-dependent L-type calcium channel subunit beta-3
OID30649	CACYBP	Inflammation_II	CACYBP	Q9HB71	1	174999163	175012027	Calcyclin-binding protein
OID30915	CADPS	Neurology_II	CADPS	Q9ULU8	3	62398346	62875416	Calcium-dependent secretion activator 1
OID21306	CALB1	Oncology	CALB1	P05937	8	90058608	90095475	Calbindin
OID20801	CALB2	Neurology	CALB2	P22676	16	71358713	71390436	Calretinin
OID20983	CALCA	Neurology	CALCA	P01258	11	14966668	14972351	Calcitonin
OID31100	CALCB	Neurology_II	CALCB	P10092	11	14904997	15082342	Calcitonin gene-related peptide 2
OID21387	CALCOCO1	Oncology	CALCOCO1	Q9P1Z2	12	53708517	53727745	Calcium-binding and coiled-coil domain-containing protein 1
OID30249	CALCOCO2	Cardiometabolic_II	CALCOCO2	Q13137	17	48831018	48866522	Calcium-binding and coiled-coil domain-containing protein 2
OID30144	CALY	Cardiometabolic_II	CALY	Q9NYX4	10	133324072	133336935	Neuron-specific vesicular protein calcyon
OID21182	CAMKK1	Oncology	CAMKK1	Q8N5S9	17	3860315	3894891	Calcium/calmodulin-dependent protein kinase kinase 1
OID30952	CAMLG	Neurology_II	CAMLG	P49069	5	134738495	134752157	Guided entry of tail-anchored proteins factor CAMLG
OID31070	CAMSAP1	Neurology_II	CAMSAP1	Q5T5Y3	9	135808487	135907546	Calmodulin-regulated spectrin-associated protein 1
OID20181	CANT1	Cardiometabolic	CANT1	Q8WVQ1	17	78991716	79009867	Soluble calcium-activated nucleotidase 1
OID21431	CAPG	Oncology	CAPG	P40121	2	85394753	85418432	Macrophage-capping protein
OID31384	CAPN3	Oncology_II	CAPN3	P20807	15	42359498	42412949	Calpain-3
OID31126	CAPS	Neurology_II	CAPS	Q13938	19	5912339	5916211	Calcyphosin
OID20859	CARHSP1	Neurology	CARHSP1	Q9Y2V2	16	8852942	8869012	Calcium-regulated heat-stable protein 1
OID30921	CASC3	Neurology_II	CASC3	O15234	17	40140318	40172171	Protein CASC3
OID20854	CASP1	Neurology	CASP1	P29466	11	105025443	105035250	Caspase-1
OID20893	CASP10	Neurology	CASP10	Q92851	2	201182898	201229406	Caspase-10
OID20555	CASP2	Inflammation	CASP2	P42575	7	143288215	143307696	Caspase-2
OID20305	CASP3	Cardiometabolic	CASP3	P42574	4	184627696	184649509	Caspase-3
OID31276	CASP4	Oncology_II	CASP4	P49662	11	104942866	104969366	Caspase-4
OID31135	CASP7	Neurology_II	CASP7	P55210	10	113679162	113730907	Caspase-7
OID21414	CASP8	Oncology	CASP8	Q14790	2	201233443	201287711	Caspase-8
OID30530	CASP9	Inflammation_II	CASP9	P55211	1	15490832	15526534	Caspase-9
OID30063	CASQ2	Cardiometabolic_II	CASQ2	O14958	1	115700021	115768714	Calsequestrin-2
OID30712	CAT	Inflammation_II	CAT	P04040	11	34438934	34472060	Catalase
OID20179	CBLIF	Cardiometabolic	CBLIF	P27352	11	59829273	59845499	Cobalamin binding intrinsic factor
OID30851	CBLN1	Neurology_II	CBLN1	P23435	16	49277917	49281838	Cerebellin-1
OID21386	CBLN4	Oncology	CBLN4	Q9NTU7	20	55997357	56005519	Cerebellin-4
OID30200	CBS	Cardiometabolic_II	CBS	P35520	21	43053191	43076943	Cystathionine beta-synthase
OID30177	CBX2	Cardiometabolic_II	CBX2	Q14781	17	79778148	79787983	Chromobox protein homolog 2
OID20958	CC2D1A	Neurology	CC2D1A	Q6P1N0	19	13906201	13930879	Coiled-coil and C2 domain-containing protein 1A
OID31077	CCAR2	Neurology_II	CCAR2	Q8N163	8	22604757	22620964	Cell cycle and apoptosis regulator protein 2
OID31413	CCDC134	Oncology_II	CCDC134	Q9H6E4	22	41800679	41832164	Coiled-coil domain-containing protein 134
OID30973	CCDC28A	Neurology_II	CCDC28A	Q8IWP9	6	138773769	138793319	Coiled-coil domain-containing protein 28A
OID31001	CCDC50	Neurology_II	CCDC50	Q8IVM0	3	191329085	191398659	Coiled-coil domain-containing protein 50
OID20226	CCDC80	Cardiometabolic	CCDC80	Q76M96	3	112596797	112649530	Coiled-coil domain-containing protein 80
OID30221	CCER2	Cardiometabolic_II	CCER2	I3L3R5	19	38908980	38912186	Coiled-coil domain-containing glutamate-rich protein 2
OID20668	CCL11	Inflammation	CCL11	P51671	17	34285742	34288334	Eotaxin
OID20655	CCL13	Inflammation	CCL13	Q99616	17	34356480	34358610	C-C motif chemokine 13
OID20401	CCL14	Cardiometabolic	CCL14	Q16627	17	35983288	35987004	C-C motif chemokine 14
OID20328	CCL15	Cardiometabolic	CCL15	Q16663	17	35996440	36001553	C-C motif chemokine 15
OID20334	CCL16	Cardiometabolic	CCL16	O15467	17	35976493	35981497	C-C motif chemokine 16
OID20745	CCL17	Inflammation	CCL17	Q92583	16	57404767	57416063	C-C motif chemokine 17
OID20395	CCL18	Cardiometabolic	CCL18	P55774	17	36064272	36072032	C-C motif chemokine 18
OID21030	CCL19	Neurology	CCL19	Q99731	9	34689570	34691276	C-C motif chemokine 19
OID21004	CCL2	Neurology	CCL2	P13500	17	34255218	34257203	C-C motif chemokine 2
OID20671	CCL20	Inflammation	CCL20	P78556	2	227805739	227817564	C-C motif chemokine 20
OID20686	CCL21	Inflammation	CCL21	O00585	9	34709005	34710136	C-C motif chemokine 21
OID20765	CCL22	Inflammation	CCL22	O00626	16	57358783	57366189	C-C motif chemokine 22
OID20693	CCL23	Inflammation	CCL23	P55773	17	36013056	36017972	C-C motif chemokine 23
OID20772	CCL24	Inflammation	CCL24	O00175	7	75810825	75823356	C-C motif chemokine 24
OID20674	CCL25	Inflammation	CCL25	O15444	19	8052318	8062660	C-C motif chemokine 25
OID20546	CCL26	Inflammation	CCL26	Q9Y258	7	75769533	75789896	C-C motif chemokine 26
OID20121	CCL27	Cardiometabolic	CCL27	Q9Y4X3	9	34661880	34664048	C-C motif chemokine 27
OID20569	CCL28	Inflammation	CCL28	Q9NRJ3	5	43376645	43412391	C-C motif chemokine 28
OID20610	CCL3	Inflammation	CCL3	P10147	17	36088256	36090169	C-C motif chemokine 3
OID20695	CCL4	Inflammation	CCL4	P13236	17	36103827	36105621	C-C motif chemokine 4
OID20412	CCL5	Cardiometabolic	CCL5	P13501	17	35871491	35880793	C-C motif chemokine 5
OID20523	CCL7	Inflammation	CCL7	P80098	17	34270221	34272242	C-C motif chemokine 7
OID21466	CCL8	Oncology	CCL8	P80075	17	34319435	34321402	C-C motif chemokine 8
OID21368	CCN1	Oncology	CCN1	O00622	1	85580761	85584589	CCN family member 1
OID20709	CCN2	Inflammation	CCN2	P29279	6	131948176	131951372	CCN family member 2
OID20299	CCN3	Cardiometabolic	CCN3	P48745	8	119416446	119424434	CCN family member 3
OID21444	CCN4	Oncology	CCN4	O95388	8	133191039	133231690	CCN family member 4
OID21068	CCN5	Neurology	CCN5	O76076	20	44714844	44728509	CCN family member 5
OID31316	CCND2	Oncology_II	CCND2	P30279	12	4269771	4305353	G1/S-specific cyclin-D2
OID30456	CCNE1	Inflammation_II	CCNE1	P24864	19	29811991	29824312	G1/S-specific cyclin-E1
OID20973	CCS	Neurology	CCS	O14618	11	66593153	66606019	Copper chaperone for superoxide dismutase
OID21200	CCT5	Oncology	CCT5	P48643	5	10249929	10266389	T-complex protein 1 subunit epsilon
OID31480	CD101	Oncology_II	CD101	Q93033	1	117001750	117036552	Immunoglobulin superfamily member 2
OID21108	CD109	Neurology	CD109	Q6YHK3	6	73695785	73828316	CD109 antigen
OID20378	CD14	Cardiometabolic	CD14	P08571	5	140631728	140633701	Monocyte differentiation antigen CD14
OID20647	CD160	Inflammation	CD160	O95971	1	145719471	145739288	CD160 antigen
OID20360	CD163	Cardiometabolic	CD163	Q86VB7	12	7470811	7503893	Scavenger receptor cysteine-rich type 1 protein M130
OID21080	CD164	Neurology	CD164	Q04900	6	109366514	109382467	Sialomucin core protein 24
OID30922	CD164L2	Neurology_II	CD164L2	Q6UWJ8	1	27379176	27383333	CD164 sialomucin-like 2 protein
OID21119	CD177	Neurology	CD177	Q8N6Q3	19	43353686	43363172	CD177 antigen
OID21483	CD1C	Oncology	CD1C	P29017	1	158289923	158294774	T-cell surface glycoprotein CD1c
OID30097	CD2	Cardiometabolic_II	CD2	P06729	1	116754430	116769229	T-cell surface antigen CD2
OID20603	CD200	Inflammation	CD200	P41217	3	112332347	112362812	OX-2 membrane glycoprotein
OID20595	CD200R1	Inflammation	CD200R1	Q8TD46	3	112921205	112975103	Cell surface glycoprotein CD200 receptor 1
OID21298	CD207	Oncology	CD207	Q9UJ71	2	70830211	70835816	C-type lectin domain family 4 member K
OID20262	CD209	Cardiometabolic	CD209	Q9NNX6	19	7739993	7747564	CD209 antigen
OID20637	CD22	Inflammation	CD22	P20273	19	35319261	35347361	B-cell receptor CD22
OID30556	CD226	Inflammation_II	CD226	Q15762	18	69831158	69961803	CD226 antigen
OID20628	CD244	Inflammation	CD244	Q9BZW8	1	160830160	160862887	Natural killer cell receptor 2B4
OID30394	CD248	Cardiometabolic_II	CD248	Q9HCU0	11	66314494	66317044	Endosialin
OID21527	CD27	Oncology	CD27	P26842	12	6444955	6451718	CD27 antigen
OID20966	CD274	Neurology	CD274	Q9NZQ7	9	5450503	5470566	Programmed cell death 1 ligand 1
OID20680	CD276	Inflammation	CD276	Q5ZPR3	15	73683966	73714514	CD276 antigen
OID21265	CD28	Oncology	CD28	P10747	2	203706475	203738912	T-cell-specific surface glycoprotein CD28
OID20177	CD2AP	Cardiometabolic	CD2AP	Q9Y5K6	6	47477789	47627263	CD2-associated protein
OID30576	CD300A	Inflammation_II	CD300A	Q9UGN4	17	74466399	74484794	CMRF35-like molecule 8
OID21010	CD300C	Neurology	CD300C	Q08708	17	74541073	74546115	CMRF35-like molecule 6
OID21418	CD300E	Oncology	CD300E	Q496F6	17	74609885	74623738	CMRF35-like molecule 2
OID21469	CD300LF	Oncology	CD300LF	Q8TDQ1	17	74694311	74712978	CMRF35-like molecule 1
OID21130	CD300LG	Neurology	CD300LG	Q6UXG3	17	43847148	43863639	CMRF35-like molecule 9
OID21328	CD302	Oncology	CD302	Q8IX05	2	159768628	159798255	CD302 antigen
OID21472	CD33	Oncology	CD33	P20138	19	51225064	51243860	Myeloid cell surface antigen CD33
OID21025	CD34	Neurology	CD34	P28906	1	207880972	207911402	Hematopoietic progenitor cell antigen CD34
OID30485	CD36	Inflammation_II	CD36	P16671	7	80369575	80679277	Platelet glycoprotein 4
OID21316	CD38	Oncology	CD38	P28907	4	15778275	15853232	ADP-ribosyl cyclase/cyclic ADP-ribose hydrolase 1
OID30827	CD3D	Neurology_II	CD3D	P04234	11	118339075	118342705	T-cell surface glycoprotein CD3 delta chain
OID31302	CD3E	Oncology_II	CD3E	P07766	11	118304730	118316175	T-cell surface glycoprotein CD3 epsilon chain
OID30448	CD3G	Inflammation_II	CD3G	P09693	11	118344344	118355161	T-cell surface glycoprotein CD3 gamma chain
OID20584	CD4	Inflammation	CD4	P01730	12	6786858	6820799	T-cell surface glycoprotein CD4
OID20724	CD40	Inflammation	CD40	P25942	20	46118278	46129863	Tumor necrosis factor receptor superfamily member 5
OID20616	CD40LG	Inflammation	CD40LG	P29965	X	136648158	136660390	CD40 ligand
OID20380	CD46	Cardiometabolic	CD46	P15529	1	207752054	207795513	Membrane cofactor protein
OID20692	CD48	Inflammation	CD48	P09326	1	160678746	160711831	CD48 antigen
OID21449	CD5	Oncology	CD5	P06127	11	61102489	61127852	T-cell surface glycoprotein CD5
OID20377	CD55	Cardiometabolic	CD55	P08174	1	207321532	207386804	Complement decay-accelerating factor
OID20716	CD58	Inflammation	CD58	P19256	1	116514534	116571039	Lymphocyte function-associated antigen 3
OID20339	CD59	Cardiometabolic	CD59	P13987	11	33703010	33736479	CD59 glycoprotein
OID30775	CD5L	Inflammation_II	CD5L	O43866	1	157830911	157898256	CD5 antigen-like
OID20649	CD6	Inflammation	CD6	P30203	11	60971680	61020377	T-cell differentiation antigen CD6
OID20988	CD63	Neurology	CD63	P08962	12	55725323	55729707	CD63 antigen
OID20206	CD69	Cardiometabolic	CD69	Q07108	12	9752486	9760901	Early activation antigen CD69
OID30543	CD7	Inflammation_II	CD7	P09564	17	82314868	82317608	T-cell antigen CD7
OID20599	CD70	Inflammation	CD70	P32970	19	6583183	6604103	CD70 antigen
OID30641	CD72	Inflammation_II	CD72	P21854	9	35609982	35646810	B-cell differentiation antigen CD72
OID21040	CD74	Neurology	CD74	P04233	5	150401637	150412969	HLA class II histocompatibility antigen gamma chain
OID20635	CD79B	Inflammation	CD79B	P40259	17	63928740	63932336	B-cell antigen receptor complex-associated protein beta chain
OID30291	CD80	Cardiometabolic_II	CD80	P33681	3	119524293	119559614	T-lymphocyte activation antigen CD80
OID31256	CD82	Oncology_II	CD82	P27701	11	44564427	44620358	CD82 antigen
OID20565	CD83	Inflammation	CD83	Q01151	6	14117256	14136918	CD83 antigen
OID20607	CD84	Inflammation	CD84	Q9UIB8	1	160541095	160579516	SLAM family member 5
OID31500	CD86	Oncology_II	CD86	P42081	3	122055362	122121139	T-lymphocyte activation antigen CD86
OID21018	CD8A	Neurology	CD8A	P01732	2	86784610	86808396	T-cell surface glycoprotein CD8 alpha chain
OID20397	CD93	Cardiometabolic	CD93	Q9NPY3	20	23079360	23086324	Complement component C1q receptor
OID21110	CD99	Neurology	CD99	P14209	X	2691187	2741309	CD99 antigen
OID21122	CD99L2	Neurology	CD99L2	Q8TCZ2	X	150766336	150898816	CD99 antigen-like protein 2
OID30345	CDA	Cardiometabolic_II	CDA	P32320	1	20589086	20618903	Cytidine deaminase
OID31076	CDAN1	Neurology_II	CDAN1	Q8IWY9	15	42723544	42737128	Codanin-1
OID31242	CDC123	Oncology_II	CDC123	O75794	10	12195965	12250589	Cell division cycle protein 123 homolog
OID31189	CDC25A	Oncology_II	CDC25A	P30304	3	48157146	48188417	M-phase inducer phosphatase 1
OID31508	CDC26	Oncology_II	CDC26	Q8NHZ8	9	113255835	113275572	Anaphase-promoting complex subunit CDC26
OID21238	CDC27	Oncology	CDC27	P30260	17	47117703	47189422	Cell division cycle protein 27 homolog
OID21470	CDC37	Oncology	CDC37	Q16543	19	10391133	10420121	Hsp90 co-chaperone Cdc37
OID31485	CDC42BPB	Oncology_II	CDC42BPB	Q9Y5S2	14	102932380	103057549	Serine/threonine-protein kinase MRCK beta
OID20940	CDCP1	Neurology	CDCP1	Q9H5V8	3	45082277	45146422	CUB domain-containing protein 1
OID20353	CDH1	Cardiometabolic	CDH1	P12830	16	68737292	68835537	Cadherin-1
OID21005	CDH15	Neurology	CDH15	P55291	16	89171748	89195492	Cadherin-15
OID20134	CDH17	Cardiometabolic	CDH17	Q12864	8	94127162	94217303	Cadherin-17
OID20170	CDH2	Cardiometabolic	CDH2	P19022	18	27932879	28177946	Cadherin-2
OID31332	CDH22	Oncology_II	CDH22	Q9UJ99	20	46173739	46308498	Cadherin-22
OID31074	CDH23	Neurology_II	CDH23	Q9H251	10	71396920	71815947	Cadherin-23
OID21008	CDH3	Neurology	CDH3	P22223	16	68636189	68727468	Cadherin-3
OID30875	CDH4	Neurology_II	CDH4	P55283	20	61252261	61940617	Cadherin-4
OID20243	CDH5	Cardiometabolic	CDH5	P33151	16	66366622	66404784	Cadherin-5
OID20157	CDH6	Cardiometabolic	CDH6	P55285	5	31193686	31329146	Cadherin-6
OID20808	CDHR1	Neurology	CDHR1	Q96JP9	10	84194537	84219621	Cadherin-related family member 1
OID21282	CDHR2	Oncology	CDHR2	Q9BYE9	5	176542511	176595974	Cadherin-related family member 2
OID20193	CDHR5	Cardiometabolic	CDHR5	Q9HBB8	11	616577	626078	Cadherin-related family member 5
OID31164	CDK1	Oncology_II	CDK1	P06493	10	60778331	60794852	Cyclin-dependent kinase 1
OID30985	CDK5RAP3	Neurology_II	CDK5RAP3	Q96JB5	17	47967810	47981781	CDK5 regulatory subunit-associated protein 3
OID30796	CDKL5	Neurology_II	CDKL5	O76039	X	18425583	18653629	Cyclin-dependent kinase-like 5
OID21319	CDKN1A	Oncology	CDKN1A	P38936	6	36676460	36687337	Cyclin-dependent kinase inhibitor 1
OID21295	CDKN2D	Oncology	CDKN2D	P55273	19	10566460	10569059	Cyclin-dependent kinase 4 inhibitor D
OID21318	CDNF	Oncology	CDNF	Q49AH0	10	14819245	14838575	Cerebral dopamine neurotrophic factor
OID20754	CDON	Inflammation	CDON	Q4KMG0	11	125955796	126063335	Cell adhesion molecule-related/down-regulated by oncogenes
OID20667	CDSN	Inflammation	CDSN	Q15517	6	31115087	31120446	Corneodesmosin
OID21528	CEACAM1	Oncology	CEACAM1	P13688	19	42507304	42561234	Carcinoembryonic antigen-related cell adhesion molecule 1
OID31495	CEACAM16	Oncology_II	CEACAM16	Q2WEN9	19	44699151	44710718	Carcinoembryonic antigen-related cell adhesion molecule 16
OID31251	CEACAM18	Oncology_II	CEACAM18	A8MTB9	19	51478539	51491301	Carcinoembryonic antigen-related cell adhesion molecule 18
OID31443	CEACAM19	Oncology_II	CEACAM19	Q7Z692	19	44662278	44684359	Carcinoembryonic antigen-related cell adhesion molecule 19
OID31308	CEACAM20	Oncology_II	CEACAM20	Q6UY09	19	44501677	44529788	Carcinoembryonic antigen-related cell adhesion molecule 20
OID20548	CEACAM21	Inflammation	CEACAM21	Q3KPI0	19	41549518	41586844	Carcinoembryonic antigen-related cell adhesion molecule 21
OID21245	CEACAM3	Oncology	CEACAM3	P40198	19	41796587	41811554	Carcinoembryonic antigen-related cell adhesion molecule 3
OID21171	CEACAM5	Oncology	CEACAM5	P06731	19	41708585	41730433	Carcinoembryonic antigen-related cell adhesion molecule 5
OID30362	CEACAM6	Cardiometabolic_II	CEACAM6	P40199	19	41750977	41772211	Carcinoembryonic antigen-related cell adhesion molecule 6
OID20102	CEACAM8	Cardiometabolic	CEACAM8	P31997	19	42580243	42595055	Carcinoembryonic antigen-related cell adhesion molecule 8
OID30458	CEBPA	Inflammation_II	CEBPA	P49715	19	33299934	33302534	CCAAT/enhancer-binding protein alpha
OID20052	CEBPB	Cardiometabolic	CEBPB	P17676	20	50190830	50192668	CCAAT/enhancer-binding protein beta
OID30411	CELA2A	Cardiometabolic_II	CELA2A	P08217	1	15456728	15472091	Chymotrypsin-like elastase family member 2A
OID20298	CELA3A	Cardiometabolic	CELA3A	P09093	1	22001657	22012542	Chymotrypsin-like elastase family member 3A
OID30593	CELSR2	Inflammation_II	CELSR2	Q9HCU4	1	109249539	109275751	Cadherin EGF LAG seven-pass G-type receptor 2
OID30499	CEMIP2	Inflammation_II	CEMIP2	Q9UHN6	9	71683366	71816690	Cell surface hyaluronidase
OID30821	CEND1	Neurology_II	CEND1	Q8N111	11	787115	790113	Cell cycle exit and neuronal differentiation protein 1
OID31329	CENPF	Oncology_II	CENPF	P49454	1	214603195	214664571	Centromere protein F
OID31314	CENPJ	Oncology_II	CENPJ	Q9HC77	13	24882279	24922889	Centromere protein J
OID30115	CEP112	Cardiometabolic_II	CEP112	Q8N8E3	17	65635537	66192133	Centrosomal protein of 112 kDa
OID31249	CEP152	Oncology_II	CEP152	O94986	15	48712928	48811146	Centrosomal protein of 152 kDa
OID20441	CEP164	Inflammation	CEP164	Q9UPV0	11	117314557	117413266	Centrosomal protein of 164 kDa
OID30240	CEP170	Cardiometabolic_II	CEP170	Q5SW79	1	243124428	243255348	Centrosomal protein of 170 kDa
OID21209	CEP20	Oncology	CEP20	Q96NB1	16	15865719	15888625	Centrosomal protein 20
OID31287	CEP290	Oncology_II	CEP290	O15078	12	88049016	88142099	Centrosomal protein of 290 kDa
OID31247	CEP350	Oncology_II	CEP350	Q5VT06	1	179954674	180114880	Centrosome-associated protein 350
OID20084	CEP43	Cardiometabolic	CEP43	O95684	6	166999317	167094789	Centrosomal protein 43
OID21241	CEP85	Oncology	CEP85	Q6P2H3	1	26234200	26278808	Centrosomal protein of 85 kDa
OID20857	CERT	Neurology	CERT1	Q9Y5P4	5	75356345	75512138	Ceramide transfer protein
OID20244	CES1	Cardiometabolic	CES1	P23141	16	55802851	55833337	Liver carboxylesterase 1
OID21366	CES2	Oncology	CES2	O00748	16	66934444	66945096	Cocaine esterase
OID21340	CES3	Oncology	CES3	Q6UWW8	16	66961245	66975149	Carboxylesterase 3
OID20836	CETN2	Neurology	CETN2	P41208	X	152826994	152830757	Centrin-2
OID31525	CETN3	Oncology_II	CETN3	O15182	5	90392257	90409766	Centrin-3
OID30755	CFB	Inflammation_II	CFB	P00751	6	31945650	31952086	Complement factor B
OID21261	CFC1	Oncology	CFC1	P0CG37	2	130592165	130599575	Cryptic protein
OID30738	CFD	Inflammation_II	CFD	P00746	19	859453	867884	Complement factor D
OID30790	CFH	Inflammation_II	CFH	P08603	1	196651754	196752476	Complement factor H
OID30720	CFHR2	Inflammation_II	CFHR2	P36980	1	196943738	196959622	Complement factor H-related protein 2
OID30758	CFHR4	Inflammation_II	CFHR4	Q92496	1	196888014	196918795	Complement factor H-related protein 4
OID30716	CFHR5	Inflammation_II	CFHR5	Q9BXR6	1	196975010	197009678	Complement factor H-related protein 5
OID30772	CFI	Inflammation_II	CFI	P05156	4	109731008	109802150	Complement factor I
OID30784	CFP	Inflammation_II	CFP	P27918	X	47623172	47630305	Properdin
OID21069	CGA	Neurology	CGA	P01215	6	87085498	87095106	Glycoprotein hormones alpha chain
OID30671	CGB3_CGB5_CGB8	Inflammation_II	CGB5;CGB8;CGB3	P0DN86;P0DN86;P0DN86	19;19;19	49043848;49047638;49022869	49045311;49049111;49024333	Choriogonadotropin subunit beta 3
OID30894	CGN	Neurology_II	CGN	Q9P2M7	1	151510510	151538692	Cingulin
OID20152	CGREF1	Cardiometabolic	CGREF1	Q99674	2	27098889	27119128	Cell growth regulator with EF hand domain protein 1
OID21230	CHAC2	Oncology	CHAC2	Q8WUX2	2	53767804	53775196	Glutathione-specific gamma-glutamylcyclotransferase 2
OID30660	CHAD	Inflammation_II	CHAD	O15335	17	50464496	50468906	Chondroadherin
OID31116	CHCHD10	Neurology_II	CHCHD10	Q8WYQ3	22	23765834	23767972	Coiled-coil-helix-coiled-coil-helix domain-containing protein 10, mitochondrial
OID31426	CHCHD6	Oncology_II	CHCHD6	Q9BRQ6	3	126704240	126960420	MICOS complex subunit MIC25
OID20054	CHEK2	Cardiometabolic	CHEK2	O96017	22	28687743	28742422	Serine/threonine-protein kinase Chk2
OID30403	CHGA	Cardiometabolic_II	CHGA	P10645	14	92923150	92935285	Chromogranin-A
OID21038	CHGB	Neurology	CHGB	P05060	20	5911510	5925353	Secretogranin-1
OID20399	CHI3L1	Cardiometabolic	CHI3L1	P36222	1	203178931	203186704	Chitinase-3-like protein 1
OID20312	CHIT1	Cardiometabolic	CHIT1	Q13231	1	203212827	203273641	Chitotriosidase-1
OID20366	CHL1	Cardiometabolic	CHL1	O00533	3	196763	409417	Neural cell adhesion molecule L1-like protein
OID30972	CHM	Neurology_II	CHM	P24386	X	85861180	86047561	Rab proteins geranylgeranyltransferase component A 1
OID20930	CHMP1A	Neurology	CHMP1A	Q9HD42	16	89640816	89657738	Charged multivesicular body protein 1a
OID30327	CHMP6	Cardiometabolic_II	CHMP6	Q96FZ7	17	80991598	81009517	Charged multivesicular body protein 6
OID30869	CHP1	Neurology_II	CHP1	Q99653	15	41230839	41281887	Calcineurin B homologous protein 1
OID20771	CHRDL1	Inflammation	CHRDL1	Q9BU40	X	110673856	110795819	Chordin-like protein 1
OID20223	CHRDL2	Cardiometabolic	CHRDL2	Q6WN34	11	74696429	74731426	Chordin-like protein 2
OID30930	CHRM1	Neurology_II	CHRM1	P11229	11	62908679	62921807	Muscarinic acetylcholine receptor M1
OID21501	CIAPIN1	Oncology	CIAPIN1	Q6FI81	16	57428187	57447420	Anamorsin
OID30399	CILP	Cardiometabolic_II	CILP	O75339	15	65194760	65211473	Cartilage intermediate layer protein 1
OID31328	CINP	Oncology_II	CINP	Q9BW66	14	102341102	102362916	Cyclin-dependent kinase 2-interacting protein
OID31503	CIRBP	Oncology_II	CIRBP	Q14011	19	1259384	1274880	Cold-inducible RNA-binding protein
OID30970	CIT	Neurology_II	CIT	O14578	12	119685791	119877320	Citron Rho-interacting kinase
OID20617	CKAP4	Inflammation	CKAP4	Q07065	12	106237881	106304279	Cytoskeleton-associated protein 4
OID30400	CKB	Cardiometabolic_II	CKB	P12277	14	103519667	103522833	Creatine kinase B-type
OID20721	CKMT1A_CKMT1B	Inflammation	CKMT1B;CKMT1A	P12532;P12532	15;15	43593054;43692886	43604901;43699222	Creatine kinase U-type, mitochondrial
OID31192	CLASP1	Oncology_II	CLASP1	Q7Z460	2	121337776	121649476	CLIP-associating protein 1
OID20126	CLC	Cardiometabolic	CLC	Q05315	19	39731255	39738029	Galectin-10
OID20928	CLEC10A	Neurology	CLEC10A	Q8IUN9	17	7074537	7080307	C-type lectin domain family 10 member A
OID21112	CLEC11A	Neurology	CLEC11A	Q9Y240	19	50723364	50725708	C-type lectin domain family 11 member A
OID30552	CLEC12A	Inflammation_II	CLEC12A	Q5QGZ9	12	9951316	9995694	C-type lectin domain family 12 member A
OID21090	CLEC14A	Neurology	CLEC14A	Q86T13	14	38254000	38256093	C-type lectin domain family 14 member A
OID20099	CLEC1A	Cardiometabolic	CLEC1A	Q8NC01	12	10069554	10111627	C-type lectin domain family 1 member A
OID21061	CLEC1B	Neurology	CLEC1B	Q9P126	12	9985642	10013424	C-type lectin domain family 1 member B
OID30884	CLEC2L	Neurology_II	CLEC2L	P0C7M8	7	139523685	139544985	C-type lectin domain family 2 member L
OID30756	CLEC3B	Inflammation_II	CLEC3B	P05452	3	45001548	45036071	Tetranectin
OID20573	CLEC4A	Inflammation	CLEC4A	Q9UMR7	12	8123617	8138607	C-type lectin domain family 4 member A
OID20547	CLEC4C	Inflammation	CLEC4C	Q8WTT0	12	7729383	7751605	C-type lectin domain family 4 member C
OID20609	CLEC4D	Inflammation	CLEC4D	Q8WXI8	12	8509475	8522366	C-type lectin domain family 4 member D
OID20590	CLEC4G	Inflammation	CLEC4G	Q6UXB4	19	7728957	7733906	C-type lectin domain family 4 member G
OID30405	CLEC4M	Cardiometabolic_II	CLEC4M	Q9H2X3	19	7763210	7769605	C-type lectin domain family 4 member M
OID20165	CLEC5A	Cardiometabolic	CLEC5A	Q9NY25	7	141927357	141947007	C-type lectin domain family 5 member A
OID21228	CLEC6A	Oncology	CLEC6A	Q6EIG7	12	8455962	8478330	C-type lectin domain family 6 member A
OID20636	CLEC7A	Inflammation	CLEC7A	Q9BXN2	12	10116777	10130258	C-type lectin domain family 7 member A
OID30957	CLGN	Neurology_II	CLGN	O14967	4	140388453	140427661	Calmegin
OID30890	CLIC5	Neurology_II	CLIC5	Q9NZA1	6	45880827	46080348	Chloride intracellular channel protein 5
OID31182	CLINT1	Oncology_II	CLINT1	Q14677	5	157785743	157859145	Clathrin interactor 1
OID20559	CLIP2	Inflammation	CLIP2	Q9UDT6	7	74289407	74405935	CAP-Gly domain-containing linker protein 2
OID21419	CLMP	Oncology	CLMP	Q9H6B4	11	123069872	123195248	CXADR-like membrane protein
OID30929	CLNS1A	Neurology_II	CLNS1A	P54105	11	77514936	77637794	Methylosome subunit pICln
OID20910	CLPP	Neurology	CLPP	Q16740	19	6361531	6370242	ATP-dependent Clp protease proteolytic subunit, mitochondrial
OID21156	CLPS	Neurology	CLPS	P04118	6	35794982	35797344	Colipase
OID20831	CLSPN	Neurology	CLSPN	Q9HAW4	1	35720218	35769978	Claspin
OID20874	CLSTN1	Neurology	CLSTN1	O94985	1	9728926	9823984	Calsyntenin-1
OID20664	CLSTN2	Inflammation	CLSTN2	Q9H4D0	3	139935185	140577397	Calsyntenin-2
OID31092	CLSTN3	Neurology_II	CLSTN3	Q9BQT9	12	7129698	7158945	Calsyntenin-3
OID20118	CLTA	Cardiometabolic	CLTA	P09496	9	36190856	36304781	Clathrin light chain A
OID30732	CLU	Inflammation_II	CLU	P10909	8	27596917	27614700	Clusterin
OID20198	CLUL1	Cardiometabolic	CLUL1	Q15846	18	596988	650334	Clusterin-like protein 1
OID30360	CMC1	Cardiometabolic_II	CMC1	Q7Z7K0	3	28241584	28325142	COX assembly mitochondrial protein homolog
OID31406	CMIP	Oncology_II	CMIP	Q8IY22	16	81444808	81711762	C-Maf-inducing protein
OID20347	CNDP1	Cardiometabolic	CNDP1	Q96KN2	18	74534500	74587212	Beta-Ala-His dipeptidase
OID30805	CNGB3	Neurology_II	CNGB3	Q9NQW8	8	86553977	86743675	Cyclic nucleotide-gated cation channel beta-3
OID30285	CNP	Cardiometabolic_II	CNP	P09543	17	41966763	41977740	2',3'-cyclic-nucleotide 3'-phosphodiesterase
OID20069	CNPY2	Cardiometabolic	CNPY2	Q9Y2B0	12	56309842	56316119	Protein canopy homolog 2
OID21317	CNPY4	Oncology	CNPY4	Q8N129	7	100119634	100125508	Protein canopy homolog 4
OID20127	CNST	Cardiometabolic	CNST	Q6PJW8	1	246566444	246668595	Consortin
OID30807	CNTF	Neurology_II	CNTF	P26441	11	58622665	58625733	Ciliary neurotrophic factor
OID20307	CNTN1	Cardiometabolic	CNTN1	Q12860	12	40692439	41072415	Contactin-1
OID21426	CNTN2	Oncology	CNTN2	Q02246	1	205042937	205078289	Contactin-2
OID21092	CNTN3	Neurology	CNTN3	Q9P232	3	74262568	74614659	Contactin-3
OID21117	CNTN4	Neurology	CNTN4	Q8IWV2	3	2098813	3057959	Contactin-4
OID21006	CNTN5	Neurology	CNTN5	O94779	11	99020949	100358885	Contactin-5
OID20556	CNTNAP2	Inflammation	CNTNAP2	Q9UHC6	7	146116002	148420998	Contactin-associated protein-like 2
OID30911	CNTNAP4	Neurology_II	CNTNAP4	Q9C0A0	16	76277278	76560757	Contactin-associated protein-like 4
OID30305	COCH	Cardiometabolic_II	COCH	O43405	14	30874514	30895065	Cochlin
OID30396	COL15A1	Cardiometabolic_II	COL15A1	P39059	9	98943179	99070792	Collagen alpha-1(XV) chain
OID20332	COL18A1	Cardiometabolic	COL18A1	P39060	21	45405165	45513720	Collagen alpha-1(XVIII) chain
OID20335	COL1A1	Cardiometabolic	COL1A1	P02452	17	50184101	50201632	Collagen alpha-1(I) chain
OID31464	COL24A1	Oncology_II	COL24A1	Q17RW2	1	85729233	86156943	Collagen alpha-1(XXIV) chain
OID30969	COL28A1	Neurology_II	COL28A1	Q2UY09	7	7356203	7535873	Collagen alpha-1(XXVIII) chain
OID30286	COL2A1	Cardiometabolic_II	COL2A1	P02458	12	47972967	48004554	Collagen alpha-1(II) chain
OID30379	COL3A1	Cardiometabolic_II	COL3A1	P02461	2	188974373	189012746	Collagen alpha-1(III) chain
OID20208	COL4A1	Cardiometabolic	COL4A1	P02462	13	110148963	110307157	Collagen alpha-1(IV) chain
OID31333	COL4A4	Oncology_II	COL4A4	P53420	2	227002714	227164453	Collagen alpha-4(IV) chain
OID30587	COL5A1	Inflammation_II	COL5A1	P20908	9	134641803	134844843	Collagen alpha-1(V) chain
OID20292	COL6A3	Cardiometabolic	COL6A3	P12111	2	237324003	237414328	Collagen alpha-3(VI) chain
OID20550	COL9A1	Inflammation	COL9A1	P20849	6	70216040	70303084	Collagen alpha-1(IX) chain
OID31255	COL9A2	Oncology_II	COL9A2	Q14055	1	40300489	40317813	Collagen alpha-2(IX) chain
OID20738	COLEC12	Inflammation	COLEC12	Q5KU26	18	316737	500722	Collectin-12
OID30222	COMMD1	Cardiometabolic_II	COMMD1	Q8N668	2	61888724	62147247	COMM domain-containing protein 1
OID31390	COMMD9	Oncology_II	COMMD9	Q9P000	11	36269284	36289449	COMM domain-containing protein 9
OID20405	COMP	Cardiometabolic	COMP	P49747	19	18782773	18791305	Cartilage oligomeric matrix protein
OID20086	COMT	Cardiometabolic	COMT	P21964	22	19941371	19969975	Catechol O-methyltransferase
OID30173	COPB2	Cardiometabolic_II	COPB2	P35606	3	139353946	139389736	Coatomer subunit beta'
OID20797	COPE	Neurology	COPE	O14579	19	18899514	18919387	Coatomer subunit epsilon
OID30217	COQ7	Cardiometabolic_II	COQ7	Q99807	16	19067614	19080095	5-demethoxyubiquinone hydroxylase, mitochondrial
OID20286	CORO1A	Cardiometabolic	CORO1A	P31146	16	30182827	30189076	Coronin-1A
OID30870	CORO6	Neurology_II	CORO6	Q6QEF8	17	29614756	29622912	Coronin-6
OID21297	COX5B	Oncology	COX5B	P10606	2	97646062	97648383	Cytochrome c oxidase subunit 5B, mitochondrial
OID30317	COX6B1	Cardiometabolic_II	COX6B1	P14854	19	35648323	35658782	Cytochrome c oxidase subunit 6B1
OID20280	CPA1	Cardiometabolic	CPA1	P15085	7	130380339	130388114	Carboxypeptidase A1
OID21060	CPA2	Neurology	CPA2	P48052	7	130266863	130289798	Carboxypeptidase A2
OID30606	CPA4	Inflammation_II	CPA4	Q9UI42	7	130293134	130324180	Carboxypeptidase A4
OID20289	CPB1	Cardiometabolic	CPB1	P15086	3	148791102	148860187	Carboxypeptidase B
OID30734	CPB2	Inflammation_II	CPB2	Q96IY4	13	46053186	46105033	Carboxypeptidase B2
OID21392	CPE	Oncology	CPE	P16870	4	165361194	165498547	Carboxypeptidase E
OID31186	CPLX2	Oncology_II	CPLX2	Q6PUV4	5	175796310	175884021	Complexin-2
OID21054	CPM	Neurology	CPM	P14384	12	68842197	68971570	Carboxypeptidase M
OID30495	CPOX	Inflammation_II	CPOX	P36551	3	98579446	98593648	Oxygen-dependent coproporphyrinogen-III oxidase, mitochondrial
OID21053	CPPED1	Neurology	CPPED1	Q9BRF8	16	12659799	12803887	Serine/threonine-protein phosphatase CPPED1
OID30406	CPQ	Cardiometabolic_II	CPQ	Q9Y646	8	96645242	97149654	Carboxypeptidase Q
OID30106	CPTP	Cardiometabolic_II	CPTP	Q5TA50	1	1324756	1328896	Ceramide-1-phosphate transfer protein
OID21435	CPVL	Oncology	CPVL	Q9H3G5	7	28995235	29195451	Probable serine carboxypeptidase CPVL
OID21479	CPXM1	Oncology	CPXM1	Q96SM3	20	2794074	2800627	Probable carboxypeptidase X1
OID30322	CPXM2	Cardiometabolic_II	CPXM2	Q8N436	10	123706207	123940267	Inactive carboxypeptidase-like protein X2
OID30697	CR1	Inflammation_II	CR1	P17927	1	207496147	207641765	Complement receptor type 1
OID20393	CR2	Cardiometabolic	CR2	P20023	1	207454230	207489895	Complement receptor type 2
OID21249	CRACR2A	Oncology	CRACR2A	Q9BSW2	12	3606633	3764819	EF-hand calcium-binding domain-containing protein 4B
OID20923	CRADD	Neurology	CRADD	P78560	12	93677375	93894840	Death domain-containing protein CRADD
OID31188	CREB3	Oncology_II	CREB3	O43889	9	35732598	35736999	Cyclic AMP-responsive element-binding protein 3
OID31206	CREBZF	Oncology_II	CREBZF	Q9NS37	11	85657742	85682908	CREB/ATF bZIP transcription factor
OID21515	CREG1	Oncology	CREG1	O75629	1	167529117	167553805	Protein CREG1
OID30619	CRELD1	Inflammation_II	CRELD1	Q96HD1	3	9933793	9945413	Protein disulfide isomerase CRELD1
OID20751	CRELD2	Inflammation	CRELD2	Q6UXH1	22	49918167	49927540	Protein disulfide isomerase CRELD2
OID21257	CRH	Oncology	CRH	P06850	8	66176376	66178464	Corticoliberin
OID20747	CRHBP	Inflammation	CRHBP	P24387	5	76953045	76981158	Corticotropin-releasing factor-binding protein
OID20055	CRHR1	Cardiometabolic	CRHR1	P34998	17	45784280	45835828	Corticotropin-releasing factor receptor 1
OID20701	CRIM1	Inflammation	CRIM1	Q9NZV1	2	36355778	36551135	Cysteine-rich motor neuron 1 protein
OID20901	CRIP2	Neurology	CRIP2	P52943	14	105472962	105480162	Cysteine-rich protein 2
OID21456	CRISP2	Oncology	CRISP2	P16562	6	49692358	49713590	Cysteine-rich secretory protein 2
OID30715	CRISP3	Inflammation_II	CRISP3	P54108	6	49727376	49744437	Cysteine-rich secretory protein 3
OID20742	CRKL	Inflammation	CRKL	P46109	22	20917407	20953747	Crk-like protein
OID20699	CRLF1	Inflammation	CRLF1	O75462	19	18572220	18607741	Cytokine receptor-like factor 1
OID21427	CRNN	Oncology	CRNN	Q9UBG3	1	152409243	152414263	Cornulin
OID20279	CRTAC1	Cardiometabolic	CRTAC1	Q9NQ79	10	97865000	98030828	Cartilage acidic protein 1
OID20914	CRTAM	Neurology	CRTAM	O95727	11	122838500	122872643	Cytotoxic and regulatory T-cell molecule
OID30902	CRTAP	Neurology_II	CRTAP	O75718	3	33114014	33147773	Cartilage-associated protein
OID20070	CRX	Cardiometabolic	CRX	O43186	19	47819779	47843330	Cone-rod homeobox protein
OID30319	CRYBB1	Cardiometabolic_II	CRYBB1	P53674	22	26599278	26618027	Beta-crystallin B1
OID31081	CRYBB2	Neurology_II	CRYBB2	P43320	22	25212564	25231870	Beta-crystallin B2
OID31144	CRYGD	Neurology_II	CRYGD	P07320	2	208121607	208124524	Gamma-crystallin D
OID30815	CRYM	Neurology_II	CRYM	Q14894	16	21238874	21303083	Ketimine reductase mu-crystallin
OID30272	CRYZL1	Cardiometabolic_II	CRYZL1	O95825	21	33589341	33643926	Quinone oxidoreductase-like protein 1
OID30183	CSDE1	Cardiometabolic_II	CSDE1	O75534	1	114716913	114758676	Cold shock domain-containing protein E1
OID20719	CSF1	Inflammation	CSF1	P09603	1	109910242	109930992	Macrophage colony-stimulating factor 1
OID30681	CSF1R	Inflammation_II	CSF1R	P07333	5	150053291	150113372	Macrophage colony-stimulating factor 1 receptor
OID30072	CSF2	Cardiometabolic_II	CSF2	P04141	5	132073789	132076170	Granulocyte-macrophage colony-stimulating factor
OID20915	CSF2RA	Neurology	CSF2RA	P15509	X	1268800	1310381	Granulocyte-macrophage colony-stimulating factor receptor subunit alpha
OID30553	CSF2RB	Inflammation_II	CSF2RB	P32927	22	36913628	36940439	Cytokine receptor common subunit beta
OID20491	CSF3	Inflammation	CSF3	P09919	17	40015361	40017813	Granulocyte colony-stimulating factor
OID30527	CSF3R	Inflammation_II	CSF3R	Q99062	1	36466043	36483278	Granulocyte colony-stimulating factor receptor
OID30667	CSH1	Inflammation_II	CSH1	P0DML2	17	63894909	63896661	Chorionic somatomammotropin hormone 1
OID30492	CSNK1D	Inflammation_II	CSNK1D	P48730	17	82239023	82273700	Casein kinase I isoform delta
OID31053	CSNK2A1	Neurology_II	CSNK2A1	P68400	20	472498	543835	Casein kinase II subunit alpha
OID30397	CSPG4	Cardiometabolic_II	CSPG4	Q6UVK1	15	75674322	75712848	Chondroitin sulfate proteoglycan 4
OID30843	CSPG5	Neurology_II	CSPG5	O95196	3	47562238	47580792	Chondroitin sulfate proteoglycan 5
OID30176	CSRP3	Cardiometabolic_II	CSRP3	P50461	11	19182030	19210571	Cysteine and glycine-rich protein 3
OID30581	CST1	Inflammation_II	CST1	P01037	20	23747562	23751268	Cystatin-SN
OID20400	CST3	Cardiometabolic	CST3	P01034	20	23626706	23638473	Cystatin-C
OID20995	CST5	Neurology	CST5	P28325	20	23875934	23879748	Cystatin-D
OID20293	CST6	Cardiometabolic	CST6	Q15828	11	66012008	66013505	Cystatin-M
OID20704	CST7	Inflammation	CST7	O76096	20	24949269	24959928	Cystatin-F
OID20294	CSTB	Cardiometabolic	CSTB	P04080	21	43772511	43776330	Cystatin-B
OID31299	CTAG1A_CTAG1B	Oncology_II	CTAG1A;CTAG1B	P78358;P78358	X;X	154585133;154617609	154586816;154619282	Cancer/testis antigen 1
OID30710	CTBS	Inflammation_II	CTBS	Q01459	1	84549611	84574480	Di-N-acetylchitobiase
OID20061	CTF1	Cardiometabolic	CTF1	Q16619	16	30896614	30903547	Cardiotrophin-1
OID30393	CTHRC1	Cardiometabolic_II	CTHRC1	Q96CG8	8	103371538	103382989	Collagen triple helix repeat-containing protein 1
OID30363	CTLA4	Cardiometabolic_II	CTLA4	P16410	2	203853888	203873965	Cytotoxic T-lymphocyte protein 4
OID30800	CTNNA1	Neurology_II	CTNNA1	P35221	5	138610967	138935034	Catenin alpha-1
OID21150	CTRB1	Neurology	CTRB1	P17538	16	75218988	75226338	Chymotrypsinogen B
OID20752	CTRC	Inflammation	CTRC	Q99895	1	15438442	15449242	Chymotrypsin-C
OID31157	CTRL	Neurology_II	CTRL	P40313	16	67927640	67932365	Chymotrypsin-like protease CTRL-1
OID20276	CTSB	Cardiometabolic	CTSB	P07858	8	11842524	11869533	Cathepsin B
OID20679	CTSC	Inflammation	CTSC	P53634	11	88265069	88359684	Dipeptidyl peptidase 1
OID20358	CTSD	Cardiometabolic	CTSD	P07339	11	1752752	1764573	Cathepsin D
OID30628	CTSE	Inflammation_II	CTSE	P14091	1	206008535	206023909	Cathepsin E
OID21500	CTSF	Oncology	CTSF	Q9UBX1	11	66563464	66568879	Cathepsin F
OID20113	CTSH	Cardiometabolic	CTSH	P09668	15	78921058	78949574	Pro-cathepsin H
OID20228	CTSL	Cardiometabolic	CTSL	P07711	9	87724051	87731469	Cathepsin L1
OID20660	CTSO	Inflammation	CTSO	P43234	4	155921580	155953912	Cathepsin O
OID21056	CTSS	Neurology	CTSS	P25774	1	150730079	150765957	Cathepsin S
OID21405	CTSV	Oncology	CTSV	O60911	9	97029677	97156556	Cathepsin L2
OID20365	CTSZ	Cardiometabolic	CTSZ	Q9UBR2	20	58985686	59008238	Cathepsin Z
OID30914	CUZD1	Neurology_II	CUZD1	Q86UP6	10	122832158	122846175	CUB and zona pellucida-like domain-containing protein 1
OID31479	CWC15	Oncology_II	CWC15	Q9P013	11	94962620	94973586	Spliceosome-associated protein CWC15 homolog
OID20976	CX3CL1	Neurology	CX3CL1	P78423	16	57372477	57385044	Fractalkine
OID20561	CXADR	Inflammation	CXADR	P78310	21	17513043	17593579	Coxsackievirus and adenovirus receptor
OID20762	CXCL1	Inflammation	CXCL1	P09341	4	73869393	73871308	Growth-regulated alpha protein
OID20697	CXCL10	Inflammation	CXCL10	P02778	4	76021118	76023497	C-X-C motif chemokine 10
OID21042	CXCL11	Neurology	CXCL11	O14625	4	76033682	76041415	C-X-C motif chemokine 11
OID20464	CXCL12	Inflammation	CXCL12	P48061	10	44370165	44386493	Stromal cell-derived factor 1
OID21024	CXCL13	Neurology	CXCL13	O43927	4	77511753	77611834	C-X-C motif chemokine 13
OID20458	CXCL14	Inflammation	CXCL14	O95715	5	135570679	135579279	C-X-C motif chemokine 14
OID20282	CXCL16	Cardiometabolic	CXCL16	Q9H2A7	17	4733533	4739928	C-X-C motif chemokine 16
OID20622	CXCL17	Inflammation	CXCL17	Q6UXB2	19	42428278	42442946	C-X-C motif chemokine 17
OID20788	CXCL3	Inflammation	CXCL3	P19876	4	74036589	74038807	C-X-C motif chemokine 3
OID20207	CXCL5	Cardiometabolic	CXCL5	P42830	4	73995642	73998677	C-X-C motif chemokine 5
OID20613	CXCL6	Inflammation	CXCL6	P80162	4	73836640	73849064	C-X-C motif chemokine 6
OID20631	CXCL8	Inflammation	CXCL8	P10145	4	73740541	73743716	Interleukin-8
OID20675	CXCL9	Inflammation	CXCL9	Q07325	4	76001275	76007509	C-X-C motif chemokine 9
OID31171	CYB5A	Oncology_II	CYB5A	P00167	18	74250846	74291973	Cytochrome b5
OID31512	CYB5R2	Oncology_II	CYB5R2	Q6BCY4	11	7665100	7677222	NADH-cytochrome b5 reductase 2
OID30091	CYP24A1	Cardiometabolic_II	CYP24A1	Q07973	20	54153446	54173986	1,25-dihydroxyvitamin D(3) 24-hydroxylase, mitochondrial
OID31208	CYTH3	Oncology_II	CYTH3	O43739	7	6161776	6272644	Cytohesin-3
OID30374	CYTL1	Cardiometabolic_II	CYTL1	Q9NRR1	4	5014586	5019458	Cytokine-like protein 1
OID30664	DAAM1	Inflammation_II	DAAM1	Q9Y4D1	14	59188646	59371405	Disheveled-associated activator of morphogenesis 1
OID21428	DAB2	Oncology	DAB2	P98082	5	39371675	39462300	Disabled homolog 2
OID20774	DAG1	Inflammation	DAG1	Q14118	3	49468703	49535618	Dystroglycan
OID30420	DAND5	Inflammation_II	DAND5	Q8N907	19	12965159	12974760	DAN domain family member 5
OID30505	DAPK2	Inflammation_II	DAPK2	Q9UIK4	15	63907036	64072033	Death-associated protein kinase 2
OID20524	DAPP1	Inflammation	DAPP1	Q9UN19	4	99816827	99870190	Dual adapter for phosphotyrosine and 3-phosphotyrosine and 3-phosphoinositide
OID20903	DARS1	Neurology	DARS1	P14868	2	135905881	135986100	Aspartate--tRNA ligase, cytoplasmic
OID30703	DBH	Inflammation_II	DBH	P09172	9	133636363	133659329	Dopamine beta-hydroxylase
OID21143	DBI	Neurology	DBI	P07108	2	119366924	119372550	Acyl-CoA-binding protein
OID30549	DBN1	Inflammation_II	DBN1	Q16643	5	177456608	177474401	Drebrin
OID20681	DBNL	Inflammation	DBNL	Q9UJU6	7	44044640	44069456	Drebrin-like protein
OID21474	DCBLD2	Oncology	DCBLD2	Q96PD2	3	98795941	98901695	Discoidin, CUB and LCCL domain-containing protein 2
OID30953	DCC	Neurology_II	DCC	P43146	18	52340197	53535903	Netrin receptor DCC
OID31235	DCDC2C	Oncology_II	DCDC2C	A8MYV0	2	3703575	3848008	Doublecortin domain-containing protein 2C
OID31240	DCLRE1C	Oncology_II	DCLRE1C	Q96SD1	10	14897359	14954432	Protein artemis
OID20106	DCN	Cardiometabolic	DCN	P07585	12	91140484	91183217	Decorin
OID30657	DCTD	Inflammation_II	DCTD	P32321	4	182890060	182917936	Deoxycytidylate deaminase
OID21399	DCTN1	Oncology	DCTN1	Q14203	2	74361154	74392087	Dynactin subunit 1
OID21334	DCTN2	Oncology	DCTN2	Q13561	12	57529633	57547224	Dynactin subunit 2
OID20879	DCTN6	Neurology	DCTN6	O00399	8	30156319	30183639	Dynactin subunit 6
OID20148	DCTPP1	Cardiometabolic	DCTPP1	Q9H773	16	30423615	30430030	dCTP pyrophosphatase 1
OID30830	DCUN1D1	Neurology_II	DCUN1D1	Q96GG9	3	182938074	182985953	DCN1-like protein 1
OID31231	DCUN1D2	Oncology_II	DCUN1D2	Q6PH85	13	113455819	113490951	DCN1-like protein 2
OID21480	DCXR	Oncology	DCXR	Q7Z4W1	17	82035136	82037709	L-xylulose reductase
OID30126	DDA1	Cardiometabolic_II	DDA1	Q9BW61	19	17309518	17323298	DET1- and DDB1-associated protein 1
OID21299	DDAH1	Oncology	DDAH1	O94760	1	85318481	85578363	N(G),N(G)-dimethylarginine dimethylaminohydrolase 1
OID20215	DDC	Cardiometabolic	DDC	P20711	7	50458436	50565405	Aromatic-L-amino-acid decarboxylase
OID31043	DDHD2	Neurology_II	DDHD2	O94830	8	38225218	38275558	Phospholipase DDHD2
OID30602	DDI2	Inflammation_II	DDI2	Q5TDH0	1	15617458	15669044	Protein DDI1 homolog 2
OID21009	DDR1	Neurology	DDR1	Q08345	6	30876421	30900156	Epithelial discoidin domain-containing receptor 1
OID30372	DDT	Cardiometabolic_II	DDT	P30046	22	23970542	23980525	D-dopachrome decarboxylase
OID31518	DDX1	Oncology_II	DDX1	Q92499	2	15591178	15634346	ATP-dependent RNA helicase DDX1
OID30892	DDX25	Neurology_II	DDX25	Q9UHL0	11	125903348	125943702	ATP-dependent RNA helicase DDX25
OID30494	DDX39A	Inflammation_II	DDX39A	O00148	19	14408798	14419383	ATP-dependent RNA helicase DDX39A
OID30431	DDX4	Inflammation_II	DDX4	Q9NQI0	5	55738017	55817157	Probable ATP-dependent RNA helicase DDX4
OID30944	DDX53	Neurology_II	DDX53	Q86TM3	X	22999960	23003589	Probable ATP-dependent RNA helicase DDX53
OID21226	DDX58	Oncology	DDX58	O95786	9	32455302	32526208	Antiviral innate immune response receptor RIG-I
OID20579	DECR1	Inflammation	DECR1	Q16698	8	90001405	90053633	2,4-dienoyl-CoA reductase, mitochondrial
OID20344	DEFA1_DEFA1B	Cardiometabolic	DEFA1;DEFA1B	P59665;P59665	8;8	6977649;6996766	6980092;6999198	Neutrophil defensin 1
OID30534	DEFB103A_DEFB103B	Inflammation_II	DEFB103B;DEFB103A	P81534;P81534	8;8	7428888;7881392	7430348;7882663	Beta-defensin 103
OID30849	DEFB104A_DEFB104B	Neurology_II	DEFB104B;DEFB104A	Q8WTQ1;Q8WTQ1	8;8	7470308;7836436	7475082;7841242	Beta-defensin 104
OID30823	DEFB116	Neurology_II	DEFB116	Q30KQ4	20	31303212	31308585	Beta-defensin 116
OID30858	DEFB118	Neurology_II	DEFB118	Q96PH6	20	31368601	31373923	Beta-defensin 118
OID21373	DEFB4A_DEFB4B	Oncology	DEFB4A;DEFB4B	O15263;O15263	8;8	7894677;7414855	7896716;7416863	Beta-defensin 4A
OID30050	DENND2B	Cardiometabolic_II	DENND2B	P78524	11	8693351	8910951	DENN domain-containing protein 2B
OID30493	DENR	Inflammation_II	DENR	O43583	12	122752824	122771064	Density-regulated protein
OID20620	DFFA	Inflammation	DFFA	O00273	1	10456522	10472529	DNA fragmentation factor subunit alpha
OID30859	DGCR6	Neurology_II	DGCR6	Q14129	22	18906028	18914238	Protein DGCR6
OID30546	DGKA	Inflammation_II	DGKA	P23743	12	55927319	55954027	Diacylglycerol kinase alpha
OID20466	DGKZ	Inflammation	DGKZ	Q13574	11	46332905	46380554	Diacylglycerol kinase zeta
OID30137	DHODH	Cardiometabolic_II	DHODH	Q02127	16	72008588	72027664	Dihydroorotate dehydrogenase
OID31357	DHPS	Oncology_II	DHPS	P49366	19	12675717	12681880	Deoxyhypusine synthase
OID31072	DHRS4L2	Neurology_II	DHRS4L2	Q6PKH6	14	23969874	24006408	Dehydrogenase/reductase SDR family member 4-like 2
OID20184	DIABLO	Cardiometabolic	DIABLO	Q9NR28	12	122207663	122227456	Diablo homolog, mitochondrial
OID30932	DIPK1C	Neurology_II	DIPK1C	Q0P6D2	18	74434775	74457944	Divergent protein kinase domain 1C
OID30582	DIPK2B	Inflammation_II	DIPK2B	Q9H7Y0	X	45148373	45200901	Divergent protein kinase domain 2B
OID21066	DKK1	Neurology	DKK1	O94907	10	52314281	52318042	Dickkopf-related protein 1
OID20264	DKK3	Cardiometabolic	DKK3	Q9UBP4	11	11956207	12009769	Dickkopf-related protein 3
OID20934	DKK4	Neurology	DKK4	Q9UBT3	8	42374063	42377229	Dickkopf-related protein 4
OID21313	DKKL1	Oncology	DKKL1	Q9UK85	19	49361783	49375116	Dickkopf-like protein 1
OID31071	DLG4	Neurology_II	DLG4	P78352	17	7187187	7219841	Disks large homolog 4
OID30976	DLGAP5	Neurology_II	DLGAP5	Q15398	14	55148112	55191608	Disks large-associated protein 5
OID20295	DLK1	Cardiometabolic	DLK1	P80370	14	100725705	100738224	Protein delta homolog 1
OID21525	DLL1	Oncology	DLL1	O00548	6	170282206	170306565	Delta-like protein 1
OID30255	DLL4	Cardiometabolic_II	DLL4	Q9NR61	15	40929340	40939073	Delta-like protein 4
OID30223	DMD	Cardiometabolic_II	DMD	P11532	X	31097677	33339609	Dystrophin
OID30213	DMP1	Cardiometabolic_II	DMP1	Q13316	4	87650280	87664361	Dentin matrix acidic phosphoprotein 1
OID31204	DNAJA1	Oncology_II	DNAJA1	P31689	9	33025273	33039907	DnaJ homolog subfamily A member 1
OID20627	DNAJA2	Inflammation	DNAJA2	O60884	16	46955362	46973674	DnaJ homolog subfamily A member 2
OID31130	DNAJA4	Neurology_II	DNAJA4	Q8WW22	15	78264086	78282196	DnaJ homolog subfamily A member 4
OID21363	DNAJB1	Oncology	DNAJB1	P25685	19	14514769	14560391	DnaJ homolog subfamily B member 1
OID31434	DNAJB14	Oncology_II	DNAJB14	Q8TBM8	4	99896248	99946618	DnaJ homolog subfamily B member 14
OID30661	DNAJB2	Inflammation_II	DNAJB2	P25686	2	219279342	219286898	DnaJ homolog subfamily B member 2
OID30613	DNAJB6	Inflammation_II	DNAJB6	O75190	7	157335381	157417439	DnaJ homolog subfamily B member 6
OID20093	DNAJB8	Cardiometabolic	DNAJB8	Q8NHS0	3	128462437	128466968	DnaJ homolog subfamily B member 8
OID31104	DNAJC21	Neurology_II	DNAJC21	Q5F1R6	5	34929559	34958964	DnaJ homolog subfamily C member 21
OID30247	DNAJC6	Cardiometabolic_II	DNAJC6	O75061	1	65248219	65415871	Putative tyrosine-protein phosphatase auxilin
OID31472	DNAJC9	Oncology_II	DNAJC9	Q8WXX5	10	73183362	73247255	DnaJ homolog subfamily C member 9
OID20712	DNER	Inflammation	DNER	Q8NFT8	2	229357629	229714555	Delta and Notch-like epidermal growth factor-related receptor
OID30822	DNLZ	Neurology_II	DNLZ	Q5SXM8	9	136359480	136363744	DNL-type zinc finger protein
OID31458	DNM1	Oncology_II	DNM1	Q05193	9	128191655	128255248	Dynamin-1
OID31000	DNM3	Neurology_II	DNM3	Q9UQ16	1	171817887	172418466	Dynamin-3
OID20956	DNMBP	Neurology	DNMBP	Q6XZF7	10	99875577	100009947	Dynamin-binding protein
OID31118	DNPEP	Neurology_II	DNPEP	Q9ULA0	2	219372043	219400022	Aspartyl aminopeptidase
OID20744	DNPH1	Inflammation	DNPH1	O43598	6	43225629	43229481	2'-deoxynucleoside 5'-phosphate N-hydrolase 1
OID30927	DOC2B	Neurology_II	DOC2B	Q14184	17	142789	181650	Double C2-like domain-containing protein beta
OID30836	DOCK9	Neurology_II	DOCK9	Q9BZ29	13	98793429	99086625	Dedicator of cytokinesis protein 9
OID31111	DOK1	Neurology_II	DOK1	Q99704	2	74549026	74557551	Docking protein 1
OID20138	DOK2	Cardiometabolic	DOK2	O60496	8	21908873	21913690	Docking protein 2
OID20897	DPEP1	Neurology	DPEP1	P16444	16	89613308	89638456	Dipeptidase 1
OID21305	DPEP2	Oncology	DPEP2	Q9H4A9	16	67987394	68000586	Dipeptidase 2
OID20527	DPP10	Inflammation	DPP10	Q8N608	2	114442299	115845780	Inactive dipeptidyl peptidase 10
OID20406	DPP4	Cardiometabolic	DPP4	P27487	2	161992245	162074394	Dipeptidyl peptidase 4
OID21354	DPP6	Oncology	DPP6	P42658	7	153887097	154894285	Dipeptidyl aminopeptidase-like protein 6
OID20142	DPP7	Cardiometabolic	DPP7	Q9UHL4	9	137110546	137115177	Dipeptidyl peptidase 2
OID20278	DPT	Cardiometabolic	DPT	Q07507	1	168695468	168729206	Dermatopontin
OID21410	DPY30	Oncology	DPY30	Q9C005	2	31867809	32039805	Protein dpy-30 homolog
OID20917	DRAXIN	Neurology	DRAXIN	Q8NBI3	1	11691710	11725857	Draxin
OID21335	DRG2	Oncology	DRG2	P55039	17	18087892	18107970	Developmentally-regulated GTP-binding protein 2
OID21079	DSC2	Neurology	DSC2	Q02487	18	31058840	31102522	Desmocollin-2
OID30993	DSCAM	Neurology_II	DSCAM	O60469	21	40010999	40847158	Down syndrome cell adhesion molecule
OID21113	DSG2	Neurology	DSG2	Q14126	18	31498177	31549008	Desmoglein-2
OID21460	DSG3	Oncology	DSG3	P32926	18	31447741	31478702	Desmoglein-3
OID21325	DSG4	Oncology	DSG4	Q86SJ6	18	31376777	31414912	Desmoglein-4
OID30580	DTD1	Inflammation_II	DTD1	Q8TEA8	20	18587942	18766644	D-aminoacyl-tRNA deacylase 1
OID31395	DTNB	Oncology_II	DTNB	O60941	2	25377198	25673647	Dystrobrevin beta
OID30882	DTX2	Neurology_II	DTX2	Q86UW9	7	76461676	76505995	Probable E3 ubiquitin-protein ligase DTX2
OID21349	DTX3	Oncology	DTX3	Q8N9I9	12	57604622	57609804	Probable E3 ubiquitin-protein ligase DTX3
OID30308	DTYMK	Cardiometabolic_II	DTYMK	P23919	2	241675747	241686944	Thymidylate kinase
OID20059	DUOX2	Cardiometabolic	DUOX2	Q9NRD8	15	45092650	45114172	Dual oxidase 2
OID31394	DUSP13	Oncology_II	DUSP13	Q6B8I1	10	75094432	75109221	Dual specificity protein phosphatase 13 isoform A
OID30935	DUSP29	Neurology_II	DUSP29	Q68J44	10	75037472	75073642	Dual specificity phosphatase 29
OID20827	DUSP3	Neurology	DUSP3	P51452	17	43766125	43778977	Dual specificity protein phosphatase 3
OID31457	DUT	Oncology_II	DUT	P33316	15	48331011	48343373	Deoxyuridine 5'-triphosphate nucleotidohydrolase, mitochondrial
OID31080	DXO	Neurology_II	DXO	O77932	6	31969810	31972290	Decapping and exoribonuclease protein
OID31341	DYNC1H1	Oncology_II	DYNC1H1	Q14204	14	101964573	102056443	Cytoplasmic dynein 1 heavy chain 1
OID30925	DYNLT1	Neurology_II	DYNLT1	P63172	6	158636474	158644743	Dynein light chain Tctex-type 1
OID31415	DYNLT3	Oncology_II	DYNLT3	P51808	X	37836757	37847571	Dynein light chain Tctex-type 3
OID20918	EBAG9	Neurology	EBAG9	O00559	8	109539711	109565996	Receptor-binding cancer antigen expressed on SiSo cells
OID21389	EBI3_IL27	Oncology	EBI3;IL27	Q14213;Q8NEV9	19;16	4229523;28499362	4237528;28512051	Interleukin-27
OID20891	ECE1	Neurology	ECE1	P42892	1	21217247	21345572	Endothelin-converting enzyme 1
OID30293	ECHDC3	Cardiometabolic_II	ECHDC3	Q96DC8	10	11742366	11764070	Enoyl-CoA hydratase domain-containing protein 3, mitochondrial
OID30239	ECHS1	Cardiometabolic_II	ECHS1	P30084	10	133362485	133373354	Enoyl-CoA hydratase, mitochondrial
OID30142	ECI2	Cardiometabolic_II	ECI2	O75521	6	4115693	4135597	Enoyl-CoA delta isomerase 2
OID30736	ECM1	Inflammation_II	ECM1	Q16610	1	150508062	150513789	Extracellular matrix protein 1
OID30831	ECSCR	Neurology_II	ECSCR	Q19T08	5	139448560	139462743	Endothelial cell-specific chemotaxis regulator
OID21451	EDA2R	Oncology	EDA2R	Q9HAV5	X	66595637	66639298	Tumor necrosis factor receptor superfamily member 27
OID20525	EDAR	Inflammation	EDAR	Q9UNE0	2	108894471	108989372	Tumor necrosis factor receptor superfamily member EDAR
OID31365	EDDM3B	Oncology_II	EDDM3B	P56851	14	20768404	20770948	Epididymal secretory protein E3-beta
OID30136	EDEM2	Cardiometabolic_II	EDEM2	Q9BV94	20	35115364	35147336	ER degradation-enhancing alpha-mannosidase-like protein 2
OID31010	EDF1	Neurology_II	EDF1	O60869	9	136862119	136866308	Endothelial differentiation-related factor 1
OID20081	EDIL3	Cardiometabolic	EDIL3	O43854	5	83940554	84384880	EGF-like repeat and discoidin I-like domain-containing protein 3
OID30224	EDN1	Cardiometabolic_II	EDN1	P05305	6	12290361	12297194	Endothelin-1
OID30421	EDNRB	Inflammation_II	EDNRB	P24530	13	77895481	77975529	Endothelin receptor type B
OID30335	EEF1D	Cardiometabolic_II	EEF1D	P29692	8	143579697	143599541	Elongation factor 1-delta
OID31460	EFCAB14	Oncology_II	EFCAB14	O75071	1	46674659	46719146	EF-hand calcium-binding domain-containing protein 14
OID31313	EFCAB2	Oncology_II	EFCAB2	Q5VUJ9	1	244969682	245127164	Dynein regulatory complex protein 8
OID20414	EFEMP1	Cardiometabolic	EFEMP1	Q12805	2	55865967	55924139	EGF-containing fibulin-like extracellular matrix protein 1
OID31044	EFHD1	Neurology_II	EFHD1	Q9BUP0	2	232606057	232682776	EF-hand domain-containing protein D1
OID21125	EFNA1	Neurology	EFNA1	P20827	1	155127876	155134899	Ephrin-A1
OID20935	EFNA4	Neurology	EFNA4	P52798	1	155063737	155069553	Ephrin-A4
OID30954	EFNB2	Neurology_II	EFNB2	P52799	13	106489745	106535662	Ephrin-B2
OID20698	EGF	Inflammation	EGF	P01133	4	109912883	110013766	Pro-epidermal growth factor
OID21252	EGFL7	Oncology	EGFL7	Q9UHF1	9	136658856	136672678	Epidermal growth factor-like protein 7
OID31496	EGFLAM	Oncology_II	EGFLAM	Q63HQ2	5	38258409	38465480	Pikachurin
OID20319	EGFR	Cardiometabolic	EGFR	P00533	7	55019017	55211628	Epidermal growth factor receptor
OID20572	EGLN1	Inflammation	EGLN1	Q9GZT9	1	231363751	231422287	Egl nine homolog 1
OID30302	EHBP1	Cardiometabolic_II	EHBP1	Q8NDI1	2	62673851	63046487	EH domain-binding protein 1
OID30229	EHD3	Cardiometabolic_II	EHD3	Q9NZN3	2	31234152	31269451	EH domain-containing protein 3
OID31125	EIF1AX	Neurology_II	EIF1AX	P47813	X	20124525	20141838	Eukaryotic translation initiation factor 1A, X-chromosomal
OID31442	EIF2AK2	Oncology_II	EIF2AK2	P19525	2	37099210	37157522	Interferon-induced, double-stranded RNA-activated protein kinase
OID30060	EIF2AK3	Cardiometabolic_II	EIF2AK3	Q9NZJ5	2	88556741	88691518	Eukaryotic translation initiation factor 2-alpha kinase 3
OID30270	EIF2S2	Cardiometabolic_II	EIF2S2	P20042	20	34088309	34112243	Eukaryotic translation initiation factor 2 subunit 2
OID21000	EIF4B	Neurology	EIF4B	P23588	12	53006282	53042215	Eukaryotic translation initiation factor 4B
OID30557	EIF4E	Inflammation_II	EIF4E	P06730	4	98879276	98929133	Eukaryotic translation initiation factor 4E
OID20162	EIF4EBP1	Cardiometabolic	EIF4EBP1	Q13541	8	38030534	38060365	Eukaryotic translation initiation factor 4E-binding protein 1
OID20625	EIF4G1	Inflammation	EIF4G1	Q04637	3	184314495	184335358	Eukaryotic translation initiation factor 4 gamma 1
OID31022	EIF4G3	Neurology_II	EIF4G3	O43432	1	20806292	21177285	Eukaryotic translation initiation factor 4 gamma 3
OID30156	EIF5	Cardiometabolic_II	EIF5	P55010	14	103333544	103345025	Eukaryotic translation initiation factor 5
OID20423	EIF5A	Inflammation	EIF5A	P63241	17	7306999	7312463	Eukaryotic translation initiation factor 5A-1
OID31029	ELAC1	Neurology_II	ELAC1	Q9H777	18	50967991	50988121	Zinc phosphodiesterase ELAC protein 1
OID30854	ELAVL4	Neurology_II	ELAVL4	P26378	1	50024029	50203772	ELAV-like protein 4
OID30301	ELN	Cardiometabolic_II	ELN	P15502	7	74027789	74069907	Elastin
OID21337	ELOA	Oncology	ELOA	Q14241	1	23743448	23762059	Elongin-A
OID30127	ELOB	Cardiometabolic_II	ELOB	Q15370	16	2771414	2777289	Elongin-B
OID20497	ENAH	Inflammation	ENAH	Q8N8S7	1	225486829	225653142	Protein enabled homolog
OID31498	ENDOU	Oncology_II	ENDOU	P21128	12	47709734	47725567	Poly(U)-specific endoribonuclease
OID20287	ENG	Cardiometabolic	ENG	P17813	9	127815013	127854658	Endoglin
OID21037	ENO1	Neurology	ENO1	P06733	1	8861000	8879190	Alpha-enolase
OID21046	ENO2	Neurology	ENO2	P09104	12	6913745	6923698	Gamma-enolase
OID30209	ENO3	Cardiometabolic_II	ENO3	P13929	17	4948092	4957131	Beta-enolase
OID31349	ENOPH1	Oncology_II	ENOPH1	Q9UHY7	4	82430590	82461177	Enolase-phosphatase E1
OID30152	ENOX2	Cardiometabolic_II	ENOX2	Q16206	X	130622325	130903234	Ecto-NOX disulfide-thiol exchanger 2
OID30135	ENPEP	Cardiometabolic_II	ENPEP	Q07075	4	110365733	110565285	Glutamyl aminopeptidase
OID20288	ENPP2	Cardiometabolic	ENPP2	Q13822	8	119557086	119673453	Ectonucleotide pyrophosphatase/phosphodiesterase family member 2
OID20736	ENPP5	Inflammation	ENPP5	Q9UJA9	6	46159185	46170980	Ectonucleotide pyrophosphatase/phosphodiesterase family member 5
OID30273	ENPP6	Cardiometabolic_II	ENPP6	Q6UWR7	4	184088706	184221230	Glycerophosphocholine cholinephosphodiesterase ENPP6
OID20689	ENPP7	Inflammation	ENPP7	Q6UWV6	17	79730943	79742219	Ectonucleotide pyrophosphatase/phosphodiesterase family member 7
OID31355	ENSA	Oncology_II	ENSA	O43768	1	150600851	150629612	Alpha-endosulfine
OID21260	ENTPD2	Oncology	ENTPD2	Q9Y5L3	9	137048107	137054061	Ectonucleoside triphosphate diphosphohydrolase 2
OID20104	ENTPD5	Cardiometabolic	ENTPD5	O75356	14	73958010	74019399	Ectonucleoside triphosphate diphosphohydrolase 5
OID20100	ENTPD6	Cardiometabolic	ENTPD6	O75354	20	25195693	25228075	Ectonucleoside triphosphate diphosphohydrolase 6
OID30231	ENTR1	Cardiometabolic_II	ENTR1	Q96C92	9	136401922	136410614	Endosome-associated-trafficking regulator 1
OID30438	EP300	Inflammation_II	EP300	Q09472	22	41092592	41180077	Histone acetyltransferase p300
OID30886	EPB41L5	Neurology_II	EPB41L5	Q9HCM4	2	120013077	120179119	Band 4.1-like protein 5
OID20743	EPCAM	Inflammation	EPCAM	P16422	2	47345158	47387601	Epithelial cell adhesion molecule
OID31373	EPGN	Oncology_II	EPGN	Q6UW88	4	74308470	74316789	Epigen
OID20677	EPHA1	Inflammation	EPHA1	P21709	7	143390289	143408856	Ephrin type-A receptor 1
OID20840	EPHA10	Neurology	EPHA10	Q5JZY3	1	37713880	37765133	Ephrin type-A receptor 10
OID21342	EPHA2	Oncology	EPHA2	P29317	1	16124337	16156069	Ephrin type-A receptor 2
OID30622	EPHA4	Inflammation_II	EPHA4	P54764	2	221418027	221574202	Ephrin type-A receptor 4
OID20242	EPHB4	Cardiometabolic	EPHB4	P54760	7	100802565	100827523	Ephrin type-B receptor 4
OID20982	EPHB6	Neurology	EPHB6	O15197	7	142855061	142871094	Ephrin type-B receptor 6
OID20119	EPHX2	Cardiometabolic	EPHX2	P34913	8	27490781	27545564	Bifunctional epoxide hydrolase 2
OID31252	EPN1	Oncology_II	EPN1	Q9Y6I3	19	55675226	55709858	Epsin-1
OID20522	EPO	Inflammation	EPO	P01588	7	100720468	100723700	Erythropoietin
OID30250	EPPK1	Cardiometabolic_II	EPPK1	P58107	8	143857324	143878467	Epiplakin
OID21397	EPS8L2	Oncology	EPS8L2	Q9H6S3	11	694438	727727	Epidermal growth factor receptor kinase substrate 8-like protein 2
OID21520	ERBB2	Oncology	ERBB2	P04626	17	39687914	39730426	Receptor tyrosine-protein kinase erbB-2
OID20705	ERBB3	Inflammation	ERBB3	P21860	12	56076799	56103505	Receptor tyrosine-protein kinase erbB-3
OID21510	ERBB4	Oncology	ERBB4	Q15303	2	211375717	212538841	Receptor tyrosine-protein kinase erbB-4
OID21323	ERBIN	Oncology	ERBIN	Q96RT1	5	65926556	66082546	Erbin
OID30880	ERC2	Neurology_II	ERC2	O15083	3	55508311	56469095	ERC protein 2
OID31223	ERCC1	Oncology_II	ERCC1	P07992	19	45407334	45478828	DNA excision repair protein ERCC-1
OID20905	EREG	Neurology	EREG	O14944	4	74365145	74388749	Proepiregulin
OID31317	ERI1	Oncology_II	ERI1	Q8IV48	8	9002147	9116746	3'-5' exoribonuclease 1
OID30539	ERMAP	Inflammation_II	ERMAP	Q96PL5	1	42817122	42844991	Erythroid membrane-associated protein
OID31391	ERN1	Oncology_II	ERN1	O75460	17	64039080	64130819	Serine/threonine-protein kinase/endoribonuclease IRE1
OID30578	ERP29	Inflammation_II	ERP29	P30040	12	112013348	112023449	Endoplasmic reticulum resident protein 29
OID21338	ERP44	Oncology	ERP44	Q9BS26	9	99979185	100099052	Endoplasmic reticulum resident protein 44
OID30094	ERVV-1	Cardiometabolic_II	ERVV-1	B6SEH8	19	53013921	53016123	Endogenous retrovirus group V member 1 Env polyprotein
OID20270	ESAM	Cardiometabolic	ESAM	Q96AP7	11	124752583	124762290	Endothelial cell-selective adhesion molecule
OID20758	ESM1	Inflammation	ESM1	Q9NQ30	5	54977867	55022671	Endothelial cell-specific molecule 1
OID31176	ESPL1	Oncology_II	ESPL1	Q14674	12	53268299	53293638	Separin
OID30434	ESR1	Inflammation_II	ESR1	P03372	6	151656691	152129619	Estrogen receptor
OID31134	ESYT2	Neurology_II	ESYT2	A0FGR8	7	158730995	158830253	Extended synaptotagmin-2
OID31227	EVI2B	Oncology_II	EVI2B	P34910	17	31303770	31314105	Protein EVI2B
OID30519	EVI5	Inflammation_II	EVI5	O60447	1	92508696	92792404	Ecotropic viral integration site 5 protein homolog
OID31309	EVPL	Oncology_II	EVPL	Q92817	17	76004502	76027306	Envoplakin
OID30083	EXOSC10	Cardiometabolic_II	EXOSC10	Q01780	1	11066618	11099869	Exosome component 10
OID30114	EXTL1	Cardiometabolic_II	EXTL1	Q92935	1	26019884	26036464	Exostosin-like 1
OID21017	EZR	Neurology	EZR	P15311	6	158765741	158819368	Ezrin
OID30684	F10	Inflammation_II	F10	P00742	13	113122799	113149529	Coagulation factor X
OID30773	F11	Inflammation_II	F11	P03951	4	186266189	186289681	Coagulation factor XI
OID21151	F11R	Neurology	F11R	Q9Y624	1	160995211	161021343	Junctional adhesion molecule A
OID30739	F12	Inflammation_II	F12	P00748	5	177402133	177416583	Coagulation factor XII
OID30781	F13B	Inflammation_II	F13B	P05160	1	197038741	197067260	Coagulation factor XIII B chain
OID30723	F2	Inflammation_II	F2	P00734	11	46719196	46739506	Prothrombin
OID20691	F2R	Inflammation	F2R	P25116	5	76716126	76735770	Proteinase-activated receptor 1
OID21440	F3	Oncology	F3	P13726	1	94529173	94541759	Tissue factor
OID20372	F7	Cardiometabolic	F7	P08709	13	113105788	113120685	Coagulation factor VII
OID20349	F9	Cardiometabolic	F9	P00740	X	139530739	139563459	Coagulation factor IX
OID20778	FABP1	Inflammation	FABP1	P07148	2	88122982	88128062	Fatty acid-binding protein, liver
OID20200	FABP2	Cardiometabolic	FABP2	P12104	4	119317250	119322138	Fatty acid-binding protein, intestinal
OID30351	FABP3	Cardiometabolic_II	FABP3	P05413	1	31365253	31376850	Fatty acid-binding protein, heart
OID20245	FABP4	Cardiometabolic	FABP4	P15090	8	81478419	81483236	Fatty acid-binding protein, adipocyte
OID21043	FABP5	Neurology	FABP5	Q01469	8	81280536	81284777	Fatty acid-binding protein 5
OID20076	FABP6	Cardiometabolic	FABP6	P51161	5	160187367	160238735	Gastrotropin
OID20501	FABP9	Inflammation	FABP9	Q0Z7S8	8	81458253	81461579	Fatty acid-binding protein 9
OID20151	FADD	Cardiometabolic	FADD	Q13158	11	70203296	70207390	FAS-associated death domain protein
OID31463	FAM13A	Oncology_II	FAM13A	O94988	4	88725955	89111398	Protein FAM13A
OID31005	FAM171A2	Neurology_II	FAM171A2	A8MVW0	17	44353215	44363853	Protein FAM171A2
OID31338	FAM171B	Oncology_II	FAM171B	Q6P995	2	186694060	186765959	Protein FAM171B
OID30248	FAM172A	Cardiometabolic_II	FAM172A	Q8WUF8	5	93617725	94111699	Cotranscriptional regulator FAM172A
OID30348	FAM20A	Cardiometabolic_II	FAM20A	Q96MK3	17	68535113	68601367	Pseudokinase FAM20A
OID21372	FAM3B	Oncology	FAM3B	P58499	21	41304212	41357727	Protein FAM3B
OID20233	FAM3C	Cardiometabolic	FAM3C	Q92520	7	121348878	121396364	Protein FAM3C
OID31514	FAM3D	Oncology_II	FAM3D	Q96BQ1	3	58633946	58666834	Protein FAM3D
OID20330	FAP	Cardiometabolic	FAP	Q12884	2	162170684	162245151	Prolyl endopeptidase FAP
OID30887	FARSA	Neurology_II	FARSA	Q9Y285	19	12922479	12934037	Phenylalanine--tRNA ligase alpha subunit
OID20316	FAS	Cardiometabolic	FAS	P25445	10	88953813	89029605	Tumor necrosis factor receptor superfamily member 6
OID20665	FASLG	Inflammation	FASLG	P48023	1	172659103	172666876	Tumor necrosis factor ligand superfamily member 6
OID30378	FBLN2	Cardiometabolic_II	FBLN2	P98095	3	13549125	13638422	Fibulin-2
OID30974	FBN2	Neurology_II	FBN2	P35556	5	128257909	128659185	Fibrillin-2
OID20227	FBP1	Cardiometabolic	FBP1	P09467	9	94603133	94640249	Fructose-1,6-bisphosphatase 1
OID30332	FCAMR	Cardiometabolic_II	FCAMR	Q8WWV6	1	206957965	206970625	High affinity immunoglobulin alpha and immunoglobulin mu Fc receptor
OID20564	FCAR	Inflammation	FCAR	P24071	19	54874235	54891420	Immunoglobulin alpha Fc receptor
OID30992	FCER1A	Neurology_II	FCER1A	P12319	1	159289714	159308224	High affinity immunoglobulin epsilon receptor subunit alpha
OID21133	FCER2	Neurology	FCER2	P06734	19	7688758	7702146	Low affinity immunoglobulin epsilon Fc receptor
OID20391	FCGR2A	Cardiometabolic	FCGR2A	P12318	1	161505430	161524013	Low affinity immunoglobulin gamma Fc region receptor II-a
OID21215	FCGR2B	Oncology	FCGR2B	P31994	1	161663143	161678654	Low affinity immunoglobulin gamma Fc region receptor II-b
OID20387	FCGR3B	Cardiometabolic	FCGR3B	O75015	1	161623196	161631963	Low affinity immunoglobulin gamma Fc region receptor III-B
OID30690	FCN1	Inflammation_II	FCN1	O00602	9	134903232	134917912	Ficolin-1
OID20382	FCN2	Cardiometabolic	FCN2	Q15485	9	134880810	134887523	Ficolin-2
OID20172	FCRL1	Cardiometabolic	FCRL1	Q96LA6	1	157794403	157820120	Fc receptor-like protein 1
OID20639	FCRL2	Inflammation	FCRL2	Q96LA5	1	157745733	157777132	Fc receptor-like protein 2
OID20443	FCRL3	Inflammation	FCRL3	Q96P31	1	157674321	157700769	Fc receptor-like protein 3
OID21111	FCRL5	Neurology	FCRL5	Q96RD9	1	157513377	157552515	Fc receptor-like protein 5
OID20529	FCRL6	Inflammation	FCRL6	Q6DN72	1	159800511	159816257	Fc receptor-like protein 6
OID21193	FCRLB	Oncology	FCRLB	Q6BAA4	1	161721563	161728143	Fc receptor-like B
OID30078	FDX1	Cardiometabolic_II	FDX1	P10109	11	110429948	110464884	Adrenodoxin, mitochondrial
OID30147	FDX2	Cardiometabolic_II	FDX2	Q6P4F2	19	10310045	10316015	Ferredoxin-2, mitochondrial
OID21192	FEN1	Oncology	FEN1	P39748	11	61792911	61797238	Flap endonuclease 1
OID21207	FES	Oncology	FES	P07332	15	90883695	90895776	Tyrosine-protein kinase Fes/Fps
OID20404	FETUB	Cardiometabolic	FETUB	Q9UGM5	3	186635969	186653141	Fetuin-B
OID30788	FGA	Inflammation_II	FGA	P02671	4	154583128	154590745	Fibrinogen alpha chain
OID31040	FGD3	Neurology_II	FGD3	Q5JSP0	9	92947523	93036236	FYVE, RhoGEF and PH domain-containing protein 3
OID30454	FGF12	Inflammation_II	FGF12	P61328	3	192139390	192767764	Fibroblast growth factor 12
OID30535	FGF16	Inflammation_II	FGF16	O43320	X	77447389	77457278	Fibroblast growth factor 16
OID20715	FGF19	Inflammation	FGF19	O95750	11	69698238	69704022	Fibroblast growth factor 19
OID20503	FGF2	Inflammation	FGF2	P09038	4	122826708	122898236	Fibroblast growth factor 2
OID30459	FGF20	Inflammation_II	FGF20	Q9NP95	8	16992181	17002345	Fibroblast growth factor 20
OID21402	FGF21	Oncology	FGF21	Q9NSA1	19	48755524	48758333	Fibroblast growth factor 21
OID21411	FGF23	Oncology	FGF23	Q9GZV9	12	4368227	4379712	Fibroblast growth factor 23
OID30544	FGF3	Inflammation_II	FGF3	P11487	11	69809968	69819416	Fibroblast growth factor 3
OID20490	FGF5	Inflammation	FGF5	P12034	4	80266639	80336680	Fibroblast growth factor 5
OID30443	FGF6	Inflammation_II	FGF6	P10767	12	4428155	4445815	Fibroblast growth factor 6
OID31241	FGF7	Oncology_II	FGF7	P21781	15	49423237	49488775	Fibroblast growth factor 7
OID31193	FGF9	Oncology_II	FGF9	P31371	13	21671073	21704498	Fibroblast growth factor 9
OID21507	FGFBP1	Oncology	FGFBP1	Q14512	4	15935577	15938740	Fibroblast growth factor-binding protein 1
OID30395	FGFBP2	Cardiometabolic_II	FGFBP2	Q9BYJ0	4	15960245	15969309	Fibroblast growth factor-binding protein 2
OID31108	FGFBP3	Neurology_II	FGFBP3	Q8TAT2	10	91906584	91909486	Fibroblast growth factor-binding protein 3
OID21478	FGFR2	Oncology	FGFR2	P21802	10	121478332	121598458	Fibroblast growth factor receptor 2
OID30646	FGFR4	Inflammation_II	FGFR4	P22455	5	177086905	177098144	Fibroblast growth factor receptor 4
OID30702	FGL1	Inflammation_II	FGL1	Q08830	8	17864380	17910365	Fibrinogen-like protein 1
OID20828	FGR	Neurology	FGR	P09769	1	27612064	27635185	Tyrosine-protein kinase Fgr
OID30839	FH	Neurology_II	FH	P07954	1	241497511	241519799	Fumarate hydratase, mitochondrial
OID30187	FHIP2A	Cardiometabolic_II	FHIP2A	Q5W0V3	10	114821744	114899832	FHF complex subunit HOOK interacting protein 2A
OID20872	FHIT	Neurology	FHIT	P49789	3	59747277	61251459	Bis(5'-adenosyl)-triphosphatase
OID20722	FIS1	Inflammation	FIS1	Q9Y3D6	7	101239458	101252316	Mitochondrial fission 1 protein
OID31065	FKBP14	Neurology_II	FKBP14	Q9NWM8	7	30010587	30026702	Peptidyl-prolyl cis-trans isomerase FKBP14
OID20618	FKBP1B	Inflammation	FKBP1B	P68106	2	24049701	24063681	Peptidyl-prolyl cis-trans isomerase FKBP1B
OID20960	FKBP4	Neurology	FKBP4	Q02790	12	2794970	2805423	Peptidyl-prolyl cis-trans isomerase FKBP4
OID20937	FKBP5	Neurology	FKBP5	Q13451	6	35573585	35728583	Peptidyl-prolyl cis-trans isomerase FKBP5
OID20846	FKBP7	Neurology	FKBP7	Q9Y680	2	178463664	178478600	Peptidyl-prolyl cis-trans isomerase FKBP7
OID31499	FKBPL	Oncology_II	FKBPL	Q9UIM3	6	32128707	32130288	FK506-binding protein-like
OID21239	FLI1	Oncology	FLI1	Q01543	11	128686535	128813267	Friend leukemia integration 1 transcription factor
OID20946	FLRT2	Neurology	FLRT2	O43155	14	85530144	85654428	Leucine-rich repeat transmembrane protein FLRT2
OID21301	FLT1	Oncology	FLT1	P17948	13	28300346	28495145	Vascular endothelial growth factor receptor 1
OID21272	FLT3	Oncology	FLT3	P36888	13	28003274	28100592	Receptor-type tyrosine-protein kinase FLT3
OID20661	FLT3LG	Inflammation	FLT3LG	P49771	19	49474207	49486231	Fms-related tyrosine kinase 3 ligand
OID21491	FLT4	Oncology	FLT4	P35916	5	180601506	180649624	Vascular endothelial growth factor receptor 3
OID20884	FMNL1	Neurology	FMNL1	O95466	17	45221444	45247319	Formin-like protein 1
OID21233	FMR1	Oncology	FMR1	Q06787	X	147911919	147951125	Synaptic functional regulator FMR1
OID30787	FN1	Inflammation_II	FN1	P02751	2	215360440	215436073	Fibronectin
OID31127	FNDC1	Neurology_II	FNDC1	Q4ZHG4	6	159169400	159272108	Fibronectin type III domain-containing protein 1
OID31381	FNTA	Oncology_II	FNTA	P49354	8	43034194	43085788	Protein farnesyltransferase/geranylgeranyltransferase type-1 subunit alpha
OID30430	FOLH1	Inflammation_II	FOLH1	Q04609	11	49145092	49208638	Glutamate carboxypeptidase 2
OID21529	FOLR1	Oncology	FOLR1	P15328	11	72189558	72196323	Folate receptor alpha
OID21062	FOLR2	Neurology	FOLR2	P14207	11	72216601	72221950	Folate receptor beta
OID21485	FOLR3	Oncology	FOLR3	P41439	11	72114869	72139892	Folate receptor gamma
OID31221	FOS	Oncology_II	FOS	P01100	14	75278826	75282230	Proto-oncogene c-Fos
OID20791	FOSB	Neurology	FOSB	P53539	19	45467995	45475179	Protein fosB
OID30445	FOXJ3	Inflammation_II	FOXJ3	Q9UPW0	1	42176539	42335877	Forkhead box protein J3
OID20515	FOXO1	Inflammation	FOXO1	Q12778	13	40555667	40666641	Forkhead box protein O1
OID21271	FOXO3	Oncology	FOXO3	O43524	6	108559835	108684774	Forkhead box protein O3
OID30155	FRMD4B	Cardiometabolic_II	FRMD4B	Q9Y2L6	3	69168782	69542583	FERM domain-containing protein 4B
OID30898	FRMD7	Neurology_II	FRMD7	Q6ZUT3	X	132076990	132128020	FERM domain-containing protein 7
OID20968	FRZB	Neurology	FRZB	Q92765	2	182833275	182866637	Secreted frizzled-related protein 3
OID30233	FSHB	Cardiometabolic_II	FSHB	P01225	11	30231014	30235261	Follitropin subunit beta
OID20770	FST	Inflammation	FST	P19883	5	53480626	53487134	Follistatin
OID30254	FSTL1	Cardiometabolic_II	FSTL1	Q12841	3	120392293	120450993	Follistatin-related protein 1
OID20782	FSTL3	Inflammation	FSTL3	O95633	19	676392	683392	Follistatin-related protein 3
OID31137	FTCD	Neurology_II	FTCD	O95954	21	46136160	46155579	Formimidoyltransferase-cyclodeaminase
OID20261	FUCA1	Cardiometabolic	FUCA1	P04066	1	23845077	23868290	Tissue alpha-L-fucosidase
OID30626	FUOM	Inflammation_II	FUOM	A2VDF0	10	133355158	133358025	Fucose mutarotase
OID21514	FURIN	Oncology	FURIN	P09958	15	90868588	90883564	Furin
OID21256	FUS	Oncology	FUS	P35637	16	31180138	31191605	RNA-binding protein FUS
OID31295	FUT1	Oncology_II	FUT1	P19526	19	48748011	48755390	Galactoside alpha-(1,2)-fucosyltransferase 1
OID21013	FUT3_FUT5	Neurology	FUT3;FUT5	P21217;Q11128	19;19	5842888;5865826	5851471;5870540	3-galactosyl-N-acetylglucosaminide 4-alpha-L-fucosyltransferase FUT3_4-galactosyl-N-acetylglucosaminide 3-alpha-L-fucosyltransferase FUT5
OID20992	FUT8	Neurology	FUT8	Q9BYC5	14	65410592	65744121	Alpha-(1,6)-fucosyltransferase
OID21442	FXN	Oncology	FXN	Q16595	9	69035751	69079076	Frataxin, mitochondrial
OID20463	FXYD5	Inflammation	FXYD5	Q96DB9	19	35154730	35169881	FXYD domain-containing ion transport regulator 5
OID21140	FYB1	Neurology	FYB1	O15117	5	39105252	39274528	FYN-binding protein 1
OID30931	FZD10	Neurology_II	FZD10	Q9ULW2	12	130162459	130165740	Frizzled-10
OID30818	FZD8	Neurology_II	FZD8	Q9H461	10	35638247	35642296	Frizzled-8
OID31414	GABARAP	Oncology_II	GABARAP	O95166	17	7240008	7242449	Gamma-aminobutyric acid receptor-associated protein
OID31253	GABARAPL1	Oncology_II	GABARAPL1	Q9H0R8	12	10212458	10223128	Gamma-aminobutyric acid receptor-associated protein-like 1
OID30803	GABRA4	Neurology_II	GABRA4	P48169	4	46918900	46993581	Gamma-aminobutyric acid receptor subunit alpha-4
OID31166	GAD1	Oncology_II	GAD1	Q99259	2	170813213	170861151	Glutamate decarboxylase 1
OID30449	GAD2	Inflammation_II	GAD2	Q05329	10	26216665	26304558	Glutamate decarboxylase 2
OID31261	GADD45B	Oncology_II	GADD45B	O75293	19	2476122	2478259	Growth arrest and DNA damage-inducible protein GADD45 beta
OID30237	GADD45GIP1	Cardiometabolic_II	GADD45GIP1	Q8TAE8	19	12953119	12957223	Growth arrest and DNA damage-inducible proteins-interacting protein 1
OID31199	GAGE2A	Oncology_II	GAGE2A	Q6NT46	X	49589496	49596824	G antigen 2A
OID20727	GAL	Inflammation	GAL	P22466	11	68683779	68691175	Galanin peptides
OID21371	GALNT10	Oncology	GALNT10	Q86SR1	5	154190730	154420984	Polypeptide N-acetylgalactosaminyltransferase 10
OID21423	GALNT2	Oncology	GALNT2	Q10471	1	230057990	230282122	Polypeptide N-acetylgalactosaminyltransferase 2
OID20471	GALNT3	Inflammation	GALNT3	Q14435	2	165747588	165794659	Polypeptide N-acetylgalactosaminyltransferase 3
OID30295	GALNT5	Cardiometabolic_II	GALNT5	Q7Z7M9	2	157257705	157318491	Polypeptide N-acetylgalactosaminyltransferase 5
OID21377	GALNT7	Oncology	GALNT7	Q86SF2	4	173168811	173323967	N-acetylgalactosaminyltransferase 7
OID30133	GAMT	Cardiometabolic_II	GAMT	Q14353	19	1397026	1401570	Guanidinoacetate N-methyltransferase
OID30600	GAPDH	Inflammation_II	GAPDH	P04406	12	6534512	6538374	Glyceraldehyde-3-phosphate dehydrogenase
OID31004	GART	Neurology_II	GART	P22102	21	33503931	33543491	Trifunctional purine biosynthetic protein adenosine-3
OID31285	GAS2	Oncology_II	GAS2	O43903	11	22625509	22813001	Growth arrest-specific protein 2
OID20318	GAS6	Cardiometabolic	GAS6	Q14393	13	113820549	113864076	Growth arrest-specific protein 6
OID30109	GASK1A	Cardiometabolic_II	GASK1A	Q9UFP1	3	42979087	43067898	Golgi-associated kinase 1A
OID31083	GAST	Neurology_II	GAST	P01350	17	41712331	41715969	Gastrin
OID31219	GATA3	Oncology_II	GATA3	P23771	10	8045378	8075198	Trans-acting T-cell-specific transcription factor GATA-3
OID30253	GATD3	Cardiometabolic_II	GATD3	P0DPI2	21	44133610	44210114	Glutamine amidotransferase-like class 1 domain-containing protein 3, mitochondrial
OID30966	GBA	Neurology_II	GBA	P04062	1	155234452	155244699	Lysosomal acid glucosylceramidase
OID31128	GBP1	Neurology_II	GBP1	P32455	1	89051882	89065360	Guanylate-binding protein 1
OID20489	GBP2	Inflammation	GBP2	P32456	1	89106132	89150456	Guanylate-binding protein 2
OID20845	GBP4	Neurology	GBP4	Q96PP9	1	89181144	89198942	Guanylate-binding protein 4
OID30139	GBP6	Cardiometabolic_II	GBP6	Q6ZN66	1	89364059	89388160	Guanylate-binding protein 6
OID30780	GC	Inflammation_II	GC	P02774	4	71741696	71804041	Vitamin D-binding protein
OID31147	GCC1	Neurology_II	GCC1	Q96CN9	7	127580628	127593611	GRIP and coiled-coil domain-containing protein 1
OID21263	GCG	Oncology	GCG	P01275	2	162142882	162152404	Pro-glucagon
OID30631	GCHFR	Inflammation_II	GCHFR	P30047	15	40764068	40767708	GTP cyclohydrolase 1 feedback regulatory protein
OID30059	GCLM	Cardiometabolic_II	GCLM	P48507	1	93885199	93909456	Glutamate--cysteine ligase regulatory subunit
OID21379	GCNT1	Oncology	GCNT1	Q02742	9	76419850	76651203	Beta-1,3-galactosyl-O-glycosyl-glycoprotein beta-1,6-N-acetylglucosaminyltransferase
OID20251	GDF15	Cardiometabolic	GDF15	Q99988	19	18374731	18389176	Growth/differentiation factor 15
OID20202	GDF2	Cardiometabolic	GDF2	Q9UK05	10	47322454	47327588	Growth/differentiation factor 2
OID20861	GDNF	Neurology	GDNF	P39905	5	37812677	37840041	Glial cell line-derived neurotrophic factor
OID30303	GET3	Cardiometabolic_II	GET3	O43681	19	12737139	12748323	ATPase GET3
OID21247	GFAP	Oncology	GFAP	P14136	17	44903159	44916937	Glial fibrillary acidic protein
OID21259	GFER	Oncology	GFER	P55789	16	1984193	1987749	FAD-linked sulfhydryl oxidase ALR
OID21216	GFOD2	Oncology	GFOD2	Q3B7J2	16	67674531	67719339	Glucose-fructose oxidoreductase domain-containing protein 2
OID21457	GFRA1	Oncology	GFRA1	P56159	10	116056925	116276803	GDNF family receptor alpha-1
OID21330	GFRA2	Oncology	GFRA2	O00451	8	21690398	21812357	GDNF family receptor alpha-2
OID20933	GFRA3	Neurology	GFRA3	O60609	5	138252380	138274621	GDNF family receptor alpha-3
OID31091	GFRAL	Neurology_II	GFRAL	Q6UXV0	6	55327469	55402493	GDNF family receptor alpha-like
OID20838	GGA1	Neurology	GGA1	Q9UJY5	22	37608725	37633564	ADP-ribosylation factor-binding protein GGA1
OID30290	GGACT	Cardiometabolic_II	GGACT	Q9BVM4	13	100530164	100589528	Gamma-glutamylaminecyclotransferase
OID30304	GGCT	Cardiometabolic_II	GGCT	O75223	7	30496621	30504841	Gamma-glutamylcyclotransferase
OID20416	GGH	Cardiometabolic	GGH	Q92820	8	63014881	63039407	Gamma-glutamyl hydrolase
OID21075	GGT1	Neurology	GGT1	P19440	22	24594811	24629005	Glutathione hydrolase 1 proenzyme
OID20909	GGT5	Neurology	GGT5	P36269	22	24219654	24245108	Glutathione hydrolase 5 proenzyme
OID20220	GH1	Cardiometabolic	GH1	P01241	17	63917200	63918839	Somatotropin
OID21168	GH2	Oncology	GH2	P01242	17	63880215	63881944	Growth hormone variant
OID30574	GHR	Inflammation_II	GHR	P10912	5	42423439	42721878	Growth hormone receptor
OID20841	GHRHR	Neurology	GHRHR	Q02643	7	30938669	30993254	Growth hormone-releasing hormone receptor
OID20175	GHRL	Cardiometabolic	GHRL	Q9UBU3	3	10285666	10292947	Appetite-regulating hormone
OID31041	GID8	Neurology_II	GID8	Q9NWU2	20	62938147	62948475	Glucose-induced degradation protein 8 homolog
OID31062	GIGYF2	Neurology_II	GIGYF2	Q6Y7W6	2	232697299	232860605	GRB10-interacting GYF protein 2
OID30639	GIMAP7	Inflammation_II	GIMAP7	Q8NHV1	7	150514872	150521073	GTPase IMAP family member 7
OID31194	GIMAP8	Oncology_II	GIMAP8	Q8ND71	7	150450630	150479393	GTPase IMAP family member 8
OID30288	GIP	Cardiometabolic_II	GIP	P09681	17	48958554	48968596	Gastric inhibitory polypeptide
OID31153	GIPC2	Neurology_II	GIPC2	Q8TF65	1	77979542	78138444	PDZ domain-containing protein GIPC2
OID31507	GIPC3	Oncology_II	GIPC3	Q8TF64	19	3585478	3593541	PDZ domain-containing protein GIPC3
OID30542	GIPR	Inflammation_II	GIPR	P48546	19	45668221	45683722	Gastric inhibitory polypeptide receptor
OID30533	GIT1	Inflammation_II	GIT1	Q9Y2X7	17	29573475	29594054	ARF GTPase-activating protein GIT1
OID31187	GJA8	Oncology_II	GJA8	P48165	1	147902795	147909269	Gap junction alpha-8 protein
OID20885	GKN1	Neurology	GKN1	Q9NS71	2	68974573	68980980	Gastrokine-1
OID30594	GLA	Inflammation_II	GLA	P06280	X	101393273	101408012	Alpha-galactosidase A
OID20949	GLB1	Neurology	GLB1	P16278	3	32996609	33097202	Beta-galactosidase
OID30429	GLI2	Inflammation_II	GLI2	P10070	2	120735623	120992653	Zinc finger protein GLI2
OID31517	GLIPR1	Oncology_II	GLIPR1	P48060	12	75480753	75503863	Glioma pathogenesis-related protein 1
OID20107	GLO1	Cardiometabolic	GLO1	Q04760	6	38675925	38703145	Lactoylglutathione lyase
OID20710	GLOD4	Inflammation	GLOD4	Q9HC38	17	757097	782294	Glyoxalase domain-containing protein 4
OID30809	GLP1R	Neurology_II	GLP1R	P43220	6	39048781	39091303	Glucagon-like peptide 1 receptor
OID20195	GLRX	Cardiometabolic	GLRX	P35754	5	95751319	95822726	Glutaredoxin-1
OID30663	GLRX5	Inflammation_II	GLRX5	Q86SX6	14	95533503	95544724	Glutaredoxin-related protein 5, mitochondrial
OID20825	GLT8D2	Neurology	GLT8D2	Q9H1C3	12	103988987	104064183	Glycosyltransferase 8 domain-containing protein 2
OID31364	GLYR1	Oncology_II	GLYR1	Q49A26	16	4803203	4847288	Putative oxidoreductase GLYR1
OID30413	GM2A	Cardiometabolic_II	GM2A	P17900	5	151212150	151270440	Ganglioside GM2 activator
OID30340	GMFG	Cardiometabolic_II	GMFG	O60234	19	39328353	39342372	Glia maturation factor gamma
OID20641	GMPR	Inflammation	GMPR	P36959	6	16238587	16295549	GMP reductase 1
OID30623	GMPR2	Inflammation_II	GMPR2	Q9P2T1	14	24232422	24239242	GMP reductase 2
OID31008	GNAS	Neurology_II	GNAS	O95467	20	58839718	58911192	Neuroendocrine secretory protein 55
OID21231	GNE	Oncology	GNE	Q9Y223	9	36214441	36277042	Bifunctional UDP-N-acetylglucosamine 2-epimerase/N-acetylmannosamine kinase
OID30920	GNGT1	Neurology_II	GNGT1	P63211	7	93591573	93911265	Guanine nucleotide-binding protein G(T) subunit gamma-T1
OID21132	GNLY	Neurology	GNLY	P22749	2	85685175	85698852	Granulysin
OID30197	GNPDA1	Cardiometabolic_II	GNPDA1	P46926	5	141991749	142013041	Glucosamine-6-phosphate isomerase 1
OID30597	GNPDA2	Inflammation_II	GNPDA2	Q8TDQ7	4	44682200	44726588	Glucosamine-6-phosphate isomerase 2
OID31026	GOLGA3	Neurology_II	GOLGA3	Q08378	12	132768902	132829143	Golgin subfamily A member 3
OID21044	GOLM2	Neurology	GOLM2	Q6P4E1	15	44288719	44415758	Protein GOLM2
OID20551	GOPC	Inflammation	GOPC	Q9HD26	6	117560269	117602542	Golgi-associated PDZ and coiled-coil motif-containing protein
OID31438	GORASP2	Oncology_II	GORASP2	Q9H8Y8	2	170928464	170967130	Golgi reassembly-stacking protein 2
OID30417	GOT1	Cardiometabolic_II	GOT1	P17174	10	99396870	99430624	Aspartate aminotransferase, cytoplasmic
OID20381	GP1BA	Cardiometabolic	GP1BA	P07359	17	4932277	4935023	Platelet glycoprotein Ib alpha chain
OID30174	GP1BB	Cardiometabolic_II	GP1BB	P13224	22	19723539	19724771	Platelet glycoprotein Ib beta chain
OID20090	GP2	Cardiometabolic	GP2	P55259	16	20309574	20327808	Pancreatic secretory granule membrane major glycoprotein GP2
OID30611	GP5	Inflammation_II	GP5	P40197	3	194394821	194399266	Platelet glycoprotein V
OID21091	GP6	Neurology	GP6	Q9HCN6	19	55013705	55038264	Platelet glycoprotein VI
OID21376	GPA33	Oncology	GPA33	Q99795	1	167052836	167166479	Cell surface A33 antigen
OID21438	GPC1	Oncology	GPC1	P35052	2	240435663	240468076	Glypican-1
OID20944	GPC5	Neurology	GPC5	P78333	13	91398621	92873682	Glypican-5
OID31358	GPD1	Oncology_II	GPD1	P21695	12	50103982	50111313	Glycerol-3-phosphate dehydrogenase
OID31437	GPHA2	Oncology_II	GPHA2	Q96T91	11	64934471	64935893	Glycoprotein hormone alpha-2
OID30680	GPI	Inflammation_II	GPI	P06744	19	34359480	34402413	Glucose-6-phosphate isomerase
OID31469	GPIHBP1	Oncology_II	GPIHBP1	Q8IV16	8	143213218	143217170	Glycosylphosphatidylinositol-anchored high density lipoprotein-binding protein 1
OID20890	GPKOW	Neurology	GPKOW	Q92917	X	49113407	49123735	G-patch domain and KOW motifs-containing protein
OID20173	GPNMB	Cardiometabolic	GPNMB	Q14956	7	23235967	23275108	Transmembrane glycoprotein NMB
OID30819	GPR101	Neurology_II	GPR101	Q96P66	X	137023929	137033995	Probable G-protein coupled receptor 101
OID31013	GPR158	Neurology_II	GPR158	Q5T848	10	25174802	25602229	Probable G-protein coupled receptor 158
OID31511	GPR15L	Oncology_II	C10orf99	Q6UWK7	10	84173801	84185294	Protein GPR15L
OID20095	GPR37	Cardiometabolic	GPR37	O15354	7	124743885	124765792	Prosaposin receptor GPR37
OID31340	GPRC5C	Oncology_II	GPRC5C	Q9NQ84	17	74424851	74451653	G-protein coupled receptor family C group 5 member C
OID20192	GRAP2	Cardiometabolic	GRAP2	O75791	22	39901084	39973721	GRB2-related adapter protein 2
OID30289	GRHPR	Cardiometabolic_II	GRHPR	Q9UBQ7	9	37422666	37436990	Glyoxylate reductase/hydroxypyruvate reductase
OID30977	GRIK2	Neurology_II	GRIK2	Q13002	6	100962701	102081622	Glutamate receptor ionotropic, kainate 2
OID30802	GRIN2B	Neurology_II	GRIN2B	Q13224	12	13437942	13982002	Glutamate receptor ionotropic, NMDA 2B
OID20066	GRK5	Cardiometabolic	GRK5	P34947	10	119207571	119459745	G protein-coupled receptor kinase 5
OID21159	GRN	Neurology	GRN	P28799	17	44345246	44353106	Progranulin
OID30264	GRP	Cardiometabolic_II	GRP	P07492	18	59220158	59230774	Gastrin-releasing peptide
OID21309	GRPEL1	Oncology	GRPEL1	Q9HAV7	4	7058895	7068064	GrpE protein homolog 1, mitochondrial
OID31224	GRSF1	Oncology_II	GRSF1	Q12849	4	70815783	70839897	G-rich sequence factor 1
OID21173	GSAP	Oncology	GSAP	A4D1B5	7	77310751	77416349	Gamma-secretase-activating protein
OID30714	GSN	Inflammation_II	GSN	P06396	9	121207794	121332843	Gelsolin
OID30700	GSR	Inflammation_II	GSR	P00390	8	30678066	30727846	Glutathione reductase, mitochondrial
OID20166	GSTA1	Cardiometabolic	GSTA1	P08263	6	52791371	52803860	Glutathione S-transferase A1
OID21242	GSTA3	Oncology	GSTA3	Q16772	6	52896639	52909698	Glutathione S-transferase A3
OID30164	GSTM4	Cardiometabolic_II	GSTM4	Q03013	1	109656099	109665496	Glutathione S-transferase Mu 4
OID20876	GSTP1	Neurology	GSTP1	P09211	11	67583742	67586656	Glutathione S-transferase P
OID31097	GSTT2B	Neurology_II	GSTT2B	P0CG30	22	23957414	23961195	Glutathione S-transferase theta-2B
OID31264	GTF2IRD1	Oncology_II	GTF2IRD1	Q9UHL9	7	74453790	74602605	General transcription factor II-I repeat domain-containing protein 1
OID30946	GTPBP2	Neurology_II	GTPBP2	Q9BX10	6	43605316	43629264	GTP-binding protein 2
OID21101	GUCA2A	Neurology	GUCA2A	Q02747	1	42162690	42164745	Guanylin
OID31318	GUCY2C	Oncology_II	GUCY2C	P25092	12	14612632	14696599	Heat-stable enterotoxin receptor
OID30148	GUK1	Cardiometabolic_II	GUK1	Q16774	1	228139962	228148984	Guanylate kinase
OID20296	GUSB	Cardiometabolic	GUSB	P08236	7	65960684	65982215	Beta-glucuronidase
OID20097	GYS1	Cardiometabolic	GYS1	P13807	19	48968130	48993310	Glycogen [starch] synthase, muscle
OID20663	GZMA	Inflammation	GZMA	P12544	5	55102646	55110252	Granzyme A
OID20604	GZMB	Inflammation	GZMB	P10144	14	24630954	24634267	Granzyme B
OID20096	GZMH	Cardiometabolic	GZMH	P20718	14	24606480	24609699	Granzyme H
OID31232	H2AP	Oncology_II	H2AP	O75409	X	37990779	37991314	Huntingtin-interacting protein M
OID30132	HADH	Cardiometabolic_II	HADH	Q16836	4	107989714	108035241	Hydroxyacyl-coenzyme A dehydrogenase, mitochondrial
OID21459	HAGH	Oncology	HAGH	Q16775	16	1795620	1827157	Hydroxyacylglutathione hydrolase, mitochondrial
OID21395	HAO1	Oncology	HAO1	Q9UJM8	20	7882985	7940458	Hydroxyacid oxidase 1
OID21086	HARS1	Neurology	HARS1	P12081	5	140673035	140691537	Histidine--tRNA ligase, cytoplasmic
OID21422	HAVCR1	Oncology	HAVCR1	Q96D42	5	157029413	157059119	Hepatitis A virus cellular receptor 1
OID21137	HAVCR2	Neurology	HAVCR2	Q8TDQ0	5	157085832	157142869	Hepatitis A virus cellular receptor 2
OID21465	HBEGF	Oncology	HBEGF	Q99075	5	140332843	140346603	Proheparin-binding EGF-like growth factor
OID21433	HBQ1	Oncology	HBQ1	P09105	16	180459	181179	Hemoglobin subunit theta-1
OID30307	HBZ	Cardiometabolic_II	HBZ	P02008	16	142728	154503	Hemoglobin subunit zeta
OID30088	HCG22	Cardiometabolic_II	HCG22	E2RYF7	6	31053450	31059890	Protein PBMUCL2
OID20648	HCLS1	Inflammation	HCLS1	P14317	3	121631399	121660927	Hematopoietic lineage cell-specific protein
OID30436	HDAC8	Inflammation_II	HDAC8	Q9BY41	X	72329516	72573101	Histone deacetylase 8
OID30832	HDAC9	Neurology_II	HDAC9	Q9UKV0	7	18086949	19002416	Histone deacetylase 9
OID31447	HDDC2	Oncology_II	HDDC2	Q7Z4H3	6	125219962	125302078	5'-deoxynucleotidase HDDC2
OID21455	HDGF	Oncology	HDGF	P51858	1	156742109	156766925	Hepatoma-derived growth factor
OID31136	HDGFL2	Neurology_II	HDGFL2	Q7Z4V5	19	4472297	4502208	Hepatoma-derived growth factor-related protein 2
OID20063	HEBP1	Cardiometabolic	HEBP1	Q9NRV9	12	12974870	13000265	Heme-binding protein 1
OID30579	HEG1	Inflammation_II	HEG1	Q9ULI3	3	124965710	125055997	Protein HEG homolog 1
OID31151	HEPACAM2	Neurology_II	HEPACAM2	A8MVW5	7	93188534	93226469	HEPACAM family member 2
OID30337	HEPH	Cardiometabolic_II	HEPH	Q9BQS7	X	66162671	66268867	Hephaestin
OID20589	HEXIM1	Inflammation	HEXIM1	O94992	17	45148475	45152099	Protein HEXIM1
OID20656	HGF	Inflammation	HGF	P14210	7	81699010	81770438	Hepatocyte growth factor
OID30718	HGFAC	Inflammation_II	HGFAC	Q04756	4	3441968	3449486	Hepatocyte growth factor activator
OID21175	HGS	Oncology	HGS	O14964	17	81683326	81703138	Hepatocyte growth factor-regulated tyrosine kinase substrate
OID31107	HHEX	Neurology_II	HHEX	Q03014	10	92689955	92695647	Hematopoietically-expressed homeobox protein HHEX
OID30425	HIF1A	Inflammation_II	HIF1A	Q16665	14	61695513	61748259	Hypoxia-inducible factor 1-alpha
OID30071	HIP1	Cardiometabolic_II	HIP1	O00291	7	75533298	75738962	Huntingtin-interacting protein 1
OID31141	HIP1R	Neurology_II	HIP1R	O75146	12	122834453	122862961	Huntingtin-interacting protein 1-related protein
OID31006	HJV	Neurology_II	HJV	Q6ZVN8	1	146017468	146036746	Hemojuvelin
OID20065	HK2	Cardiometabolic	HK2	P52789	2	74834127	74893359	Hexokinase-2
OID31048	HLA-A	Neurology_II	HLA-A	P04439	6	29941260	29945884	HLA class I histocompatibility antigen, A alpha chain
OID20520	HLA-DRA	Inflammation	HLA-DRA	P01903	6	32439878	32445046	HLA class II histocompatibility antigen, DR alpha chain
OID20532	HLA-E	Inflammation	HLA-E	P13747	6	30489509	30494194	HLA class I histocompatibility antigen, alpha chain E
OID21385	HMBS	Oncology	HMBS	P08397	11	119084866	119093834	Porphobilinogen deaminase
OID30592	HMCN2	Inflammation_II	HMCN2	Q8NDA2	9	130265760	130434123	Hemicentin-2
OID30214	HMGCL	Cardiometabolic_II	HMGCL	P35914	1	23801885	23838620	Hydroxymethylglutaryl-CoA lyase, mitochondrial
OID30157	HMGCS1	Cardiometabolic_II	HMGCS1	Q01581	5	43287470	43313512	Hydroxymethylglutaryl-CoA synthase, cytoplasmic
OID31175	HMMR	Oncology_II	HMMR	O75330	5	163460203	163491941	Hyaluronan mediated motility receptor
OID20217	HMOX1	Cardiometabolic	HMOX1	P09601	22	35380361	35394214	Heme oxygenase 1
OID20887	HMOX2	Neurology	HMOX2	P30519	16	4474690	4510347	Heme oxygenase 2
OID30919	HNF1A	Neurology_II	HNF1A	P20823	12	120978543	121002512	Hepatocyte nuclear factor 1-alpha
OID20975	HNMT	Neurology	HNMT	P50135	2	137964020	138016364	Histamine N-methyltransferase
OID20051	HNRNPK	Cardiometabolic	HNRNPK	P61978	9	83968083	83980616	Heterogeneous nuclear ribonucleoprotein K
OID31037	HNRNPUL1	Neurology_II	HNRNPUL1	Q9BUJ2	19	41262496	41307787	Heterogeneous nuclear ribonucleoprotein U-like protein 1
OID20615	HPCAL1	Inflammation	HPCAL1	P37235	2	10302889	10427617	Hippocalcin-like protein 1
OID21266	HPGDS	Oncology	HPGDS	O60760	4	94298535	94342876	Hematopoietic prostaglandin D synthase
OID30409	HPSE	Cardiometabolic_II	HPSE	Q9Y251	4	83292461	83335153	Heparanase
OID31263	HRAS	Oncology_II	HRAS	P01112	11	532242	537321	GTPase Hras
OID30211	HRC	Cardiometabolic_II	HRC	P23327	19	49151198	49155396	Sarcoplasmic reticulum histidine-rich calcium-binding protein
OID30770	HRG	Inflammation_II	HRG	P04196	3	186660216	186678234	Histidine-rich glycoprotein
OID30243	HS1BP3	Cardiometabolic_II	HS1BP3	Q53T59	2	20560448	20651130	HCLS1-binding protein 3
OID21303	HS3ST3B1	Oncology	HS3ST3B1	Q9Y662	17	14301081	14349404	Heparan sulfate glucosamine 3-O-sulfotransferase 3B1
OID21441	HS6ST1	Oncology	HS6ST1	O60243	2	128236716	128318868	Heparan-sulfate 6-O-sulfotransferase 1
OID30481	HS6ST2	Inflammation_II	HS6ST2	Q96MM7	X	132626015	132961395	Heparan-sulfate 6-O-sulfotransferase 2
OID30232	HSBP1	Cardiometabolic_II	HSBP1	O75506	16	83719311	83819737	Heat shock factor-binding protein 1
OID20575	HSD11B1	Inflammation	HSD11B1	P28845	1	209686178	209734949	Corticosteroid 11-beta-dehydrogenase isozyme 1
OID31098	HSD17B14	Neurology_II	HSD17B14	Q9BPX1	19	48813018	48836510	17-beta-hydroxysteroid dehydrogenase 14
OID30145	HSD17B3	Cardiometabolic_II	HSD17B3	P37058	9	96235306	96302176	Testosterone 17-beta-dehydrogenase 3
OID30256	HSDL2	Cardiometabolic_II	HSDL2	Q6YN16	9	112380080	112472405	Hydroxysteroid dehydrogenase-like protein 2
OID20829	HSP90B1	Neurology	HSP90B1	P14625	12	103930107	103953931	Endoplasmin
OID20718	HSPA1A	Inflammation	HSPA1A	P0DMV8	6	31815543	31817946	Heat shock 70 kDa protein 1A
OID31424	HSPA2	Oncology_II	HSPA2	P54652	14	64535905	64546173	Heat shock-related 70 kDa protein 2
OID20230	HSPB1	Cardiometabolic	HSPB1	P04792	7	76302673	76304295	Heat shock protein beta-1
OID21408	HSPB6	Oncology	HSPB6	O14558	19	35754566	35758079	Heat shock protein beta-6
OID20383	HSPG2	Cardiometabolic	HSPG2	P98160	1	21822244	21937310	Basement membrane-specific heparan sulfate proteoglycan core protein
OID30824	HTR1A	Neurology_II	HTR1A	P08908	5	63957874	63962507	5-hydroxytryptamine receptor 1A
OID30866	HTR1B	Neurology_II	HTR1B	P28222	6	77460924	77463491	5-hydroxytryptamine receptor 1B
OID21471	HTRA2	Oncology	HTRA2	O43464	2	74529725	74533332	Serine protease HTRA2, mitochondrial
OID20357	HYAL1	Cardiometabolic	HYAL1	Q12794	3	50299890	50312381	Hyaluronidase-1
OID20300	HYOU1	Cardiometabolic	HYOU1	Q9Y4L1	11	119044188	119057227	Hypoxia up-regulated protein 1
OID20484	ICA1	Inflammation	ICA1	Q05084	7	8113184	8262687	Islet cell autoantigen 1
OID20411	ICAM1	Cardiometabolic	ICAM1	P05362	19	10271093	10286615	Intercellular adhesion molecule 1
OID20248	ICAM2	Cardiometabolic	ICAM2	P13598	17	64002594	64020634	Intercellular adhesion molecule 2
OID20277	ICAM3	Cardiometabolic	ICAM3	P32942	19	10333776	10339661	Intercellular adhesion molecule 3
OID20578	ICAM4	Inflammation	ICAM4	Q14773	19	10286955	10288522	Intercellular adhesion molecule 4
OID20145	ICAM5	Cardiometabolic	ICAM5	Q9UMF0	19	10289952	10296778	Intercellular adhesion molecule 5
OID21351	ICOSLG	Oncology	ICOSLG	O75144	21	44217014	44240966	ICOS ligand
OID31284	ID4	Oncology_II	ID4	P47928	6	19837370	19842197	DNA-binding protein inhibitor ID-4
OID20823	IDI2	Neurology	IDI2	Q9BXS1	10	1018910	1025859	Isopentenyl-diphosphate delta-isomerase 2
OID31474	IDO1	Oncology_II	IDO1	P14902	8	39902275	39928790	Indoleamine 2,3-dioxygenase 1
OID20619	IDS	Inflammation	IDS	P22304	X	149476988	149521096	Iduronate 2-sulfatase
OID21468	IDUA	Oncology	IDUA	P35475	4	986997	1004564	Alpha-L-iduronidase
OID31505	IFI30	Oncology_II	IFI30	P13284	19	18173162	18178117	Gamma-interferon-inducible lysosomal thiol reductase
OID31310	IFIT1	Oncology_II	IFIT1	P09914	10	89392546	89406487	Interferon-induced protein with tetratricopeptide repeats 1
OID31283	IFIT3	Oncology_II	IFIT3	O14879	10	89327307	89377473	Interferon-induced protein with tetratricopeptide repeats 3
OID31491	IFNAR1	Oncology_II	IFNAR1	P17181	21	33324387	33359864	Interferon alpha/beta receptor 1
OID20495	IFNG	Inflammation	IFNG	P01579	12	68154768	68159740	Interferon gamma
OID20678	IFNGR1	Inflammation	IFNGR1	P15260	6	137197485	137219449	Interferon gamma receptor 1
OID20941	IFNGR2	Neurology	IFNGR2	P38484	21	33403413	33479348	Interferon gamma receptor 2
OID20795	IFNL1	Neurology	IFNL1	Q8IU54	19	39296407	39298673	Interferon lambda-1
OID30791	IFNL2	Neurology_II	IFNL2	Q8IZJ0	19	39268396	39270188	Interferon lambda-2
OID20506	IFNLR1	Inflammation	IFNLR1	Q8IU57	1	24154168	24187959	Interferon lambda receptor 1
OID30129	IFNW1	Cardiometabolic_II	IFNW1	P05000	9	21140632	21141832	Interferon omega-1
OID30962	IFT20	Neurology_II	IFT20	Q8IY31	17	28328325	28335489	Intraflagellar transport protein 20 homolog
OID31059	IGBP1	Neurology_II	IGBP1	P78318	X	70133447	70166324	Immunoglobulin-binding protein 1
OID30862	IGDCC3	Neurology_II	IGDCC3	Q8IVU1	15	65327127	65378002	Immunoglobulin superfamily DCC subclass member 3
OID30402	IGDCC4	Cardiometabolic_II	IGDCC4	Q8TDY8	15	65381484	65422947	Immunoglobulin superfamily DCC subclass member 4
OID21274	IGF1R	Oncology	IGF1R	P08069	15	98648539	98964530	Insulin-like growth factor 1 receptor
OID30112	IGF2BP3	Cardiometabolic_II	IGF2BP3	O00425	7	23310209	23470491	Insulin-like growth factor 2 mRNA-binding protein 3
OID21146	IGF2R	Neurology	IGF2R	P11717	6	159969082	160113507	Cation-independent mannose-6-phosphate receptor
OID20246	IGFBP1	Cardiometabolic	IGFBP1	P08833	7	45888360	45893660	Insulin-like growth factor-binding protein 1
OID20325	IGFBP2	Cardiometabolic	IGFBP2	P18065	2	216632828	216664436	Insulin-like growth factor-binding protein 2
OID20398	IGFBP3	Cardiometabolic	IGFBP3	P17936	7	45912245	45921874	Insulin-like growth factor-binding protein 3
OID21158	IGFBP4	Neurology	IGFBP4	P22692	17	40443450	40457725	Insulin-like growth factor-binding protein 4
OID20413	IGFBP6	Cardiometabolic	IGFBP6	P24592	12	53097436	53102345	Insulin-like growth factor-binding protein 6
OID20236	IGFBP7	Cardiometabolic	IGFBP7	Q16270	4	57030773	57110385	Insulin-like growth factor-binding protein 7
OID20155	IGFBPL1	Cardiometabolic	IGFBPL1	Q8WX77	9	38406528	38424454	Insulin-like growth factor-binding protein-like 1
OID30500	IGFL4	Inflammation_II	IGFL4	Q6B9Z1	19	46039182	46077118	Insulin growth factor-like family member 4
OID30123	IGHMBP2	Cardiometabolic_II	IGHMBP2	P38935	11	68903863	68940602	DNA-binding protein SMUBP-2
OID30740	IGLC2	Inflammation_II	IGLC2	P0DOY2	22	22900976	22901437	Immunoglobulin lambda constant 2
OID31169	IGLON5	Oncology_II	IGLON5	A6NGN9	19	51311644	51330891	IgLON family member 5
OID30210	IGSF21	Cardiometabolic_II	IGSF21	Q96ID5	1	18107798	18378483	Immunoglobulin superfamily member 21
OID21312	IGSF3	Oncology	IGSF3	O75054	1	116574399	116667755	Immunoglobulin superfamily member 3
OID20167	IGSF8	Cardiometabolic	IGSF8	Q969P0	1	160091340	160098943	Immunoglobulin superfamily member 8
OID30330	IGSF9	Cardiometabolic_II	IGSF9	Q9P2J2	1	159927039	159945613	Protein turtle homolog A
OID20544	IKBKG	Inflammation	IKBKG	Q9Y6K9	X	154541199	154565046	NF-kappa-B essential modulator
OID21213	IKZF2	Oncology	IKZF2	Q9UKS7	2	212999691	213152427	Zinc finger protein Helios
OID20431	IL10	Inflammation	IL10	P22301	1	206767602	206774541	Interleukin-10
OID20420	IL10RA	Inflammation	IL10RA	Q13651	11	117986370	118003037	Interleukin-10 receptor subunit alpha
OID20696	IL10RB	Inflammation	IL10RB	Q08334	21	33266367	33310187	Interleukin-10 receptor subunit beta
OID20455	IL11	Inflammation	IL11	P20809	19	55364382	55370463	Interleukin-11
OID21327	IL12A_IL12B	Oncology	IL12A;IL12B	P29459;P29460	3;5	159988835;159314780	159996019;159330487	Interleukin-12
OID20666	IL12B	Inflammation	IL12B	P29460	5	159314780	159330487	Interleukin-12 subunit beta
OID20486	IL12RB1	Inflammation	IL12RB1	P42701	19	18058995	18098944	Interleukin-12 receptor subunit beta-1
OID30422	IL12RB2	Inflammation_II	IL12RB2	Q99665	1	67307364	67398724	Interleukin-12 receptor subunit beta-2
OID20430	IL13	Inflammation	IL13	P35225	5	132656263	132661110	Interleukin-13
OID21504	IL13RA1	Oncology	IL13RA1	P78552	X	118727133	118794535	Interleukin-13 receptor subunit alpha-1
OID30841	IL13RA2	Neurology_II	IL13RA2	Q14627	X	115003975	115019977	Interleukin-13 receptor subunit alpha-2
OID20562	IL15	Inflammation	IL15	P40933	4	141636583	141733987	Interleukin-15
OID20498	IL15RA	Inflammation	IL15RA	Q13261	10	5943639	5978187	Interleukin-15 receptor subunit alpha
OID20633	IL16	Inflammation	IL16	Q14005	15	81159575	81314058	Pro-interleukin-16
OID20469	IL17A	Inflammation	IL17A	Q16552	6	52186375	52190638	Interleukin-17A
OID20477	IL17C	Inflammation	IL17C	Q9P0M4	16	88638572	88640468	Interleukin-17C
OID20481	IL17D	Inflammation	IL17D	Q8TAD2	13	20702127	20723098	Interleukin-17D
OID20456	IL17F	Inflammation	IL17F	Q96PD4	6	52236681	52244500	Interleukin-17F
OID21089	IL17RA	Neurology	IL17RA	Q96F46	22	17084954	17115694	Interleukin-17 receptor A
OID20585	IL17RB	Inflammation	IL17RB	Q9NRM6	3	53846568	53865794	Interleukin-17 receptor B
OID20694	IL18	Inflammation	IL18	Q14116	11	112143253	112164096	Interleukin-18
OID20348	IL18BP	Cardiometabolic	IL18BP	O95998	11	71998613	72005715	Interleukin-18-binding protein
OID20652	IL18R1	Inflammation	IL18R1	Q13478	2	102311529	102398777	Interleukin-18 receptor 1
OID20900	IL18RAP	Neurology	IL18RAP	O95256	2	102418689	102452565	Interleukin-18 receptor accessory protein
OID20158	IL19	Cardiometabolic	IL19	Q9UHD0	1	206770764	206842981	Interleukin-19
OID20488	IL1A	Inflammation	IL1A	P01583	2	112773925	112784493	Interleukin-1 alpha
OID20427	IL1B	Inflammation	IL1B	P01584	2	112829751	112836816	Interleukin-1 beta
OID21116	IL1R1	Neurology	IL1R1	P14778	2	102064544	102179874	Interleukin-1 receptor type 1
OID20757	IL1R2	Inflammation	IL1R2	P27930	2	101991960	102028544	Interleukin-1 receptor type 2
OID21126	IL1RAP	Neurology	IL1RAP	Q9NPH3	3	190514051	190659750	Interleukin-1 receptor accessory protein
OID20250	IL1RL1	Cardiometabolic	IL1RL1	Q01638	2	102311502	102352037	Interleukin-1 receptor-like 1
OID20487	IL1RL2	Inflammation	IL1RL2	Q9HB29	2	102187006	102240002	Interleukin-1 receptor-like 2
OID20700	IL1RN	Inflammation	IL1RN	P18510	2	113107214	113134016	Interleukin-1 receptor antagonist protein
OID20419	IL2	Inflammation	IL2	P60568	4	122451470	122456725	Interleukin-2
OID20453	IL20	Inflammation	IL20	Q9NYY1	1	206865623	206869223	Interleukin-20
OID20422	IL20RA	Inflammation	IL20RA	Q9UHF4	6	136999971	137045180	Interleukin-20 receptor subunit alpha
OID30461	IL20RB	Inflammation_II	IL20RB	Q6UXL0	3	136946230	137011085	Interleukin-20 receptor subunit beta
OID30441	IL21R	Inflammation_II	IL21R	Q9HBE5	16	27402174	27452042	Interleukin-21 receptor
OID31407	IL22	Oncology_II	IL22	Q9GZX6	12	68248242	68253604	Interleukin-22
OID20449	IL22RA1	Inflammation	IL22RA1	Q8N6P7	1	24119771	24143140	Interleukin-22 receptor subunit alpha-1
OID20440	IL24	Inflammation	IL24	Q13007	1	206897443	206904139	Interleukin-24
OID31243	IL25	Oncology_II	IL25	Q9H293	14	23372809	23376403	Interleukin-25
OID20267	IL2RA	Cardiometabolic	IL2RA	P01589	10	6010689	6062370	Interleukin-2 receptor subunit alpha
OID20450	IL2RB	Inflammation	IL2RB	P14784	22	37125843	37175054	Interleukin-2 receptor subunit beta
OID31361	IL2RG	Oncology_II	IL2RG	P31785	X	71107404	71112108	Cytokine receptor common subunit gamma
OID31229	IL3	Oncology_II	IL3	P08700	5	132060655	132063204	Interleukin-3
OID30487	IL31	Inflammation_II	IL31	Q6EBC2	12	122172029	122174221	Interleukin-31
OID30475	IL31RA	Inflammation_II	IL31RA	Q8NI17	5	55851357	55922854	Interleukin-31 receptor subunit alpha
OID20605	IL32	Inflammation	IL32	P24001	16	3065297	3082192	Interleukin-32
OID20428	IL33	Inflammation	IL33	O95760	9	6215786	6257983	Interleukin-33
OID20809	IL34	Neurology	IL34	Q6ZMJ4	16	70579895	70660682	Interleukin-34
OID30472	IL36A	Inflammation_II	IL36A	Q9UHA7	2	113005459	113008044	Interleukin-36 alpha
OID30551	IL36G	Inflammation_II	IL36G	Q9NZH8	2	112973203	112985658	Interleukin-36 gamma
OID20461	IL3RA	Inflammation	IL3RA	P26951	X	1336616	1382689	Interleukin-3 receptor subunit alpha
OID20426	IL4	Inflammation	IL4	P05112	5	132673986	132682678	Interleukin-4
OID20576	IL4R	Inflammation	IL4R	P24394	16	27313668	27364778	Interleukin-4 receptor subunit alpha
OID20472	IL5	Inflammation	IL5	P05113	5	132541445	132556838	Interleukin-5
OID20601	IL5RA	Inflammation	IL5RA	Q01344	3	3066324	3126613	Interleukin-5 receptor subunit alpha
OID20101	IL6	Cardiometabolic	IL6	P05231	7	22725884	22732002	Interleukin-6
OID20385	IL6R	Cardiometabolic	IL6R	P08887	1	154405193	154469450	Interleukin-6 receptor subunit alpha
OID20147	IL6ST	Cardiometabolic	IL6ST	P40189	5	55935095	55995022	Interleukin-6 receptor subunit beta
OID20535	IL7	Inflammation	IL7	P13232	8	78675743	78805523	Interleukin-7
OID21136	IL7R	Neurology	IL7R	P16871	5	35852695	35879603	Interleukin-7 receptor subunit alpha
OID31298	IL9	Oncology_II	IL9	P15248	5	135892246	135895841	Interleukin-9
OID20855	ILKAP	Neurology	ILKAP	Q9H0C8	2	238170402	238203708	Integrin-linked kinase-associated serine/threonine phosphatase 2C
OID31397	IMMT	Oncology_II	IMMT	Q16891	2	86143932	86195472	MICOS complex subunit MIC60
OID20907	IMPA1	Neurology	IMPA1	P29218	8	81656914	81686331	Inositol monophosphatase 1
OID31112	IMPACT	Neurology_II	IMPACT	Q9P2X3	18	24426634	24453531	Protein IMPACT
OID30814	IMPG1	Neurology_II	IMPG1	Q17R60	6	75921114	76072678	Interphotoreceptor matrix proteoglycan 1
OID20853	ING1	Neurology	ING1	Q9UK53	13	110712736	110723339	Inhibitor of growth protein 1
OID30625	INHBB	Inflammation_II	INHBB	P09529	2	120346136	120351803	Inhibin beta B chain
OID21093	INHBC	Neurology	INHBC	P55103	12	57434784	57452062	Inhibin beta C chain
OID21345	INPP1	Oncology	INPP1	P49441	2	190343570	190371665	Inositol polyphosphate 1-phosphatase
OID30259	INPP5D	Cardiometabolic_II	INPP5D	Q92835	2	233059967	233207903	Phosphatidylinositol 3,4,5-trisphosphate 5-phosphatase 1
OID30975	INPP5J	Neurology_II	INPP5J	Q15735	22	31122731	31134697	Phosphatidylinositol 4,5-bisphosphate 5-phosphatase A
OID21314	INPPL1	Oncology	INPPL1	O15357	11	72223701	72239147	Phosphatidylinositol 3,4,5-trisphosphate 5-phosphatase 2
OID31129	INSL3	Neurology_II	INSL3	P51460	19	17816512	17821574	Insulin-like 3
OID31370	INSL4	Oncology_II	INSL4	Q14641	9	5231419	5235304	Early placenta insulin-like peptide
OID31448	INSL5	Oncology_II	INSL5	Q9Y5Q6	1	66797740	66801276	Insulin-like peptide INSL5
OID30566	INSR	Inflammation_II	INSR	P06213	19	7112255	7294414	Insulin receptor
OID20977	IPCEF1	Neurology	IPCEF1	Q8WWN9	6	154154496	154356803	Interactor protein for cytohesin exchange factors 1
OID21361	IQGAP2	Oncology	IQGAP2	Q13576	5	76403285	76708132	Ras GTPase-activating-like protein IQGAP2
OID20085	IRAG2	Cardiometabolic	IRAG2	Q12912	12	25004342	25108335	Inositol 1,4,5-triphosphate receptor associated 2
OID20485	IRAK1	Inflammation	IRAK1	P51617	X	154010506	154019902	Interleukin-1 receptor-associated kinase 1
OID20577	IRAK4	Inflammation	IRAK4	Q9NWZ3	12	43758944	43789543	Interleukin-1 receptor-associated kinase 4
OID20889	ISLR2	Neurology	ISLR2	Q6UXK2	15	74100311	74138540	Immunoglobulin superfamily containing leucine-rich repeat protein 2
OID20538	ISM1	Inflammation	ISM1	B1AKI9	20	13221274	13300651	Isthmin-1
OID30365	ISM2	Cardiometabolic_II	ISM2	Q6H9L7	14	77474394	77498816	Isthmin-2
OID31497	IST1	Oncology_II	IST1	P53990	16	71845996	71931199	IST1 homolog
OID20581	ITGA11	Inflammation	ITGA11	Q9UKX5	15	68296532	68432163	Integrin alpha-11
OID30570	ITGA2	Inflammation_II	ITGA2	P17301	5	52989340	53094779	Integrin alpha-2
OID21139	ITGA5	Neurology	ITGA5	P08648	12	54395261	54419266	Integrin alpha-5
OID20528	ITGA6	Inflammation	ITGA6	P23229	2	172427354	172506459	Integrin alpha-6
OID30537	ITGAL	Inflammation_II	ITGAL	P20701	16	30472658	30523567	Integrin alpha-L
OID21071	ITGAM	Neurology	ITGAM	P11215	16	31259967	31332892	Integrin alpha-M
OID21416	ITGAV	Oncology	ITGAV	P06756	2	186590056	186680901	Integrin alpha-V
OID31325	ITGAX	Oncology_II	ITGAX	P20702	16	31355134	31382999	Integrin alpha-X
OID20376	ITGB1	Cardiometabolic	ITGB1	P05556	10	32887273	33005792	Integrin beta-1
OID21268	ITGB1BP1	Oncology	ITGB1BP1	O14713	2	9403475	9423528	Integrin beta-1-binding protein 1
OID20112	ITGB1BP2	Cardiometabolic	ITGB1BP2	Q9UKP3	X	71301750	71305371	Integrin beta-1-binding protein 2
OID20315	ITGB2	Cardiometabolic	ITGB2	P05107	21	44885953	44931989	Integrin beta-2
OID21522	ITGB5	Oncology	ITGB5	P18084	3	124761948	124901418	Integrin beta-5
OID20493	ITGB6	Inflammation	ITGB6	P18564	2	160099667	160200313	Integrin beta-6
OID21393	ITGB7	Oncology	ITGB7	P26010	12	53191323	53207282	Integrin beta-7
OID30408	ITGBL1	Cardiometabolic_II	ITGBL1	O95965	13	101452593	101720856	Integrin beta-like protein 1
OID30722	ITIH1	Inflammation_II	ITIH1	P19827	3	52777595	52792068	Inter-alpha-trypsin inhibitor heavy chain H1
OID20352	ITIH3	Cardiometabolic	ITIH3	Q06033	3	52794768	52809009	Inter-alpha-trypsin inhibitor heavy chain H3
OID30762	ITIH4	Inflammation_II	ITIH4	Q14624	3	52812962	52830688	Inter-alpha-trypsin inhibitor heavy chain H4
OID31430	ITIH5	Oncology_II	ITIH5	Q86UX2	10	7559270	7666998	Inter-alpha-trypsin inhibitor heavy chain H5
OID20504	ITM2A	Inflammation	ITM2A	O43736	X	79360384	79367667	Integral membrane protein 2A
OID30082	ITPA	Cardiometabolic_II	ITPA	Q9BY32	20	3208868	3223870	Inosine triphosphate pyrophosphatase
OID30216	ITPR1	Cardiometabolic_II	ITPR1	Q14643	3	4493345	4847506	Inositol 1,4,5-trisphosphate receptor type 1
OID30860	ITPRIP	Neurology_II	ITPRIP	Q8IWB1	10	104309698	104338465	Inositol 1,4,5-trisphosphate receptor-interacting protein
OID20833	IVD	Neurology	IVD	P26440	15	40405485	40435947	Isovaleryl-CoA dehydrogenase, mitochondrial
OID31159	IZUMO1	Oncology_II	IZUMO1	Q8IYV9	19	48740852	48746909	Izumo sperm-egg fusion protein 1
OID21064	JAM2	Neurology	JAM2	P57087	21	25639258	25717562	Junctional adhesion molecule B
OID30586	JAM3	Inflammation_II	JAM3	Q9BX67	11	134069071	134152001	Junctional adhesion molecule C
OID20494	JCHAIN	Inflammation	JCHAIN	P01591	4	70655541	70681817	Immunoglobulin J chain
OID31172	JMJD1C	Oncology_II	JMJD1C	Q15652	10	63167221	63521850	Probable JmjC domain-containing histone demethylation protein 2C
OID31520	JPT2	Oncology_II	JPT2	Q9H910	16	1678256	1702280	Jupiter microtubule associated homolog 2
OID20424	JUN	Inflammation	JUN	P05412	1	58776845	58784048	Transcription factor AP-1
OID21339	KAZALD1	Oncology	KAZALD1	Q96I82	10	101061989	101068131	Kazal-type serine protease inhibitor domain-containing protein 1
OID31481	KAZN	Oncology_II	KAZN	Q674X7	1	13892792	15118043	Kazrin
OID30813	KCNC4	Neurology_II	KCNC4	Q03721	1	110210314	110283100	Potassium voltage-gated channel subfamily C member 4
OID30899	KCNH2	Neurology_II	KCNH2	Q12809	7	150944961	150978321	Potassium voltage-gated channel subfamily H member 2
OID20813	KCNIP4	Neurology	KCNIP4	Q6PIL6	4	20728606	21948772	Kv channel-interacting protein 4
OID31148	KCTD5	Neurology_II	KCTD5	Q9NXV2	16	2682523	2709030	BTB/POZ domain-containing protein KCTD5
OID30426	KDM3A	Inflammation_II	KDM3A	Q9Y4C1	2	86440647	86492716	Lysine-specific demethylase 3A
OID21497	KDR	Oncology	KDR	P35968	4	55078481	55125595	Vascular endothelial growth factor receptor 2
OID20881	KEL	Neurology	KEL	P23276	7	142941114	142962363	Kell blood group glycoprotein
OID31245	KHDC3L	Oncology_II	KHDC3L	Q587J8	6	73362658	73364171	KH domain-containing protein 3
OID30241	KHK	Cardiometabolic_II	KHK	P50053	2	27086747	27100762	Ketohexokinase
OID31094	KIAA0319	Neurology_II	KIAA0319	Q5VV43	6	24544104	24646191	Dyslexia-associated protein KIAA0319
OID31307	KIAA1549	Oncology_II	KIAA1549	Q9HCM3	7	138831381	138981389	UPF0606 protein KIAA1549
OID31312	KIAA1549L	Oncology_II	KIAA1549L	Q6ZVL6	11	33376108	33674102	UPF0606 protein KIAA1549L
OID31392	KIAA2013	Oncology_II	KIAA2013	Q8IYS2	1	11919591	11926428	Uncharacterized protein KIAA2013
OID30163	KIF1C	Cardiometabolic_II	KIF1C	O43896	17	4997950	5028401	Kinesin-like protein KIF1C
OID30816	KIF20B	Neurology_II	KIF20B	Q96Q89	10	89701590	89774939	Kinesin-like protein KIF20B
OID30175	KIF22	Cardiometabolic_II	KIF22	Q14807	16	29790727	29805385	Kinesin-like protein KIF22
OID21320	KIFBP	Oncology	KIFBP	Q96EK5	10	68988803	69043544	KIF-binding protein
OID31431	KIR2DL2	Oncology_II	KIR2DL2	P43627	19	54754693	54769187	Killer cell immunoglobulin-like receptor 2DL2
OID21196	KIR2DL3	Oncology	KIR2DL3	P43628	19	54738513	54753052	Killer cell immunoglobulin-like receptor 2DL3
OID31432	KIR2DS4	Oncology_II	KIR2DS4	P43632	19	54832676	54848569	Killer cell immunoglobulin-like receptor 2DS4
OID21185	KIR3DL1	Oncology	KIR3DL1	P43629	19	54816468	54830778	Killer cell immunoglobulin-like receptor 3DL1
OID31191	KIR3DL2	Oncology_II	KIR3DL2	P43630	19	54850443	54867207	Killer cell immunoglobulin-like receptor 3DL2
OID30806	KIRREL1	Neurology_II	KIRREL1	Q96J84	1	157993273	158100262	Kin of IRRE-like protein 1
OID20873	KIRREL2	Neurology	KIRREL2	Q6UWL6	19	35855861	35867136	Kin of IRRE-like protein 2
OID20370	KIT	Cardiometabolic	KIT	P10721	4	54657267	54740783	Mast/stem cell growth factor receptor Kit
OID20196	KITLG	Cardiometabolic	KITLG	P21583	12	88492793	88580851	Kit ligand
OID20888	KLB	Neurology	KLB	Q86Z14	4	39406930	39451533	Beta-klotho
OID30808	KLF4	Neurology_II	KLF4	O43474	9	107484852	107490482	Krueppel-like factor 4
OID30986	KLHL41	Neurology_II	KLHL41	O60662	2	169509702	169526258	Kelch-like protein 41
OID21499	KLK1	Oncology	KLK1	P06870	19	50819146	50823787	Kallikrein-1
OID21523	KLK10	Oncology	KLK10	O43240	19	51012739	51020175	Kallikrein-10
OID21518	KLK11	Oncology	KLK11	Q9UBX7	19	51022216	51028039	Kallikrein-11
OID21201	KLK12	Oncology	KLK12	Q9UKR0	19	51029092	51035230	Kallikrein-12
OID21291	KLK13	Oncology	KLK13	Q9UKR3	19	51055626	51065114	Kallikrein-13
OID21407	KLK14	Oncology	KLK14	Q9P0G3	19	51077495	51084245	Kallikrein-14
OID31427	KLK15	Oncology_II	KLK15	Q9H2R5	19	50825289	50837213	Kallikrein-15
OID30364	KLK3	Cardiometabolic_II	KLK3	P07288	19	50854915	50860764	Prostate-specific antigen
OID21391	KLK4	Oncology	KLK4	Q9Y5K2	19	50906351	50911395	Kallikrein-4
OID21526	KLK6	Oncology	KLK6	Q92876	19	50958631	50969673	Kallikrein-6
OID30652	KLK7	Inflammation_II	KLK7	P49862	19	50976468	50984099	Kallikrein-7
OID21517	KLK8	Oncology	KLK8	O60259	19	50996007	51002711	Kallikrein-8
OID30760	KLKB1	Inflammation_II	KLKB1	P03952	4	186226438	186258471	Plasma kallikrein
OID20629	KLRB1	Inflammation	KLRB1	Q12918	12	9594551	9607916	Killer cell lectin-like receptor subfamily B member 1
OID30855	KLRC1	Neurology_II	KLRC1	P26715	12	10442264	10454685	NKG2-A/NKG2-B type II integral membrane protein
OID20632	KLRD1	Inflammation	KLRD1	Q13241	12	10226058	10329608	Natural killer cells antigen CD94
OID30464	KLRF1	Inflammation_II	KLRF1	Q9NZS2	12	9827481	9845007	Killer cell lectin-like receptor subfamily F member 1
OID31082	KLRK1	Neurology_II	KLRK1	P26718	12	10372353	10391874	NKG2-D type II integral membrane protein
OID20800	KRT14	Neurology	KRT14	P02533	17	41582279	41586895	Keratin, type I cytoskeletal 14
OID30092	KRT17	Cardiometabolic_II	KRT17	Q04695	17	41619442	41624842	Keratin, type I cytoskeletal 17
OID21296	KRT18	Oncology	KRT18	P05783	12	52948871	52952906	Keratin, type I cytoskeletal 18
OID20596	KRT19	Inflammation	KRT19	P08727	17	41523617	41528308	Keratin, type I cytoskeletal 19
OID20860	KRT5	Neurology	KRT5	P13647	12	52514575	52520530	Keratin, type II cytoskeletal 5
OID30169	KRT6C	Cardiometabolic_II	KRT6C	P48668	12	52468516	52473805	Keratin, type II cytoskeletal 6C
OID30865	KRT8	Neurology_II	KRT8	P05787	12	52897187	52949954	Keratin, type II cytoskeletal 8
OID20232	KYAT1	Cardiometabolic	KYAT1	Q16773	9	128832942	128882494	Kynurenine--oxoglutarate transaminase 1
OID20669	KYNU	Inflammation	KYNU	Q16719	2	142877657	143055833	Kynureninase
OID21484	L1CAM	Oncology	L1CAM	P32004	X	153861514	153886173	Neural cell adhesion molecule L1
OID30314	L3HYPDH	Cardiometabolic_II	L3HYPDH	Q96EM0	14	59460363	59484408	Trans-3-hydroxy-L-proline dehydratase
OID31367	LACRT	Oncology_II	LACRT	Q9GZZ8	12	54630811	54634895	Extracellular glycoprotein lacritin
OID20150	LACTB2	Cardiometabolic	LACTB2	Q53H82	8	70635318	70669185	Endoribonuclease LACTB2
OID21315	LAG3	Oncology	LAG3	P18627	12	6772512	6778455	Lymphocyte activation gene 3 protein
OID20737	LAIR1	Inflammation	LAIR1	Q6GTX8	19	54351384	54370558	Leukocyte-associated immunoglobulin-like receptor 1
OID20965	LAIR2	Neurology	LAIR2	Q6ISS4	19	54497879	54510687	Leukocyte-associated immunoglobulin-like receptor 2
OID30057	LAMA1	Cardiometabolic_II	LAMA1	P25391	18	6941742	7117797	Laminin subunit alpha-1
OID20769	LAMA4	Inflammation	LAMA4	Q16363	6	112107931	112254939	Laminin subunit alpha-4
OID30280	LAMB1	Cardiometabolic_II	LAMB1	P07942	7	107923799	108003213	Laminin subunit beta-1
OID30416	LAMP1	Cardiometabolic_II	LAMP1	P11279	13	113297239	113323672	Lysosome-associated membrane glycoprotein 1
OID21035	LAMP2	Neurology	LAMP2	P13473	X	120426148	120469365	Lysosome-associated membrane glycoprotein 2
OID20638	LAMP3	Inflammation	LAMP3	Q9UQV4	3	183122215	183163839	Lysosome-associated membrane glycoprotein 3
OID31396	LAMTOR5	Oncology_II	LAMTOR5	O43504	1	110401249	110407942	Ragulator complex protein LAMTOR5
OID20436	LAP3	Inflammation	LAP3	P28838	4	17577198	17607972	Cytosol aminopeptidase
OID31372	LARP1	Oncology_II	LARP1	Q6PKG0	5	154682986	154817605	La-related protein 1
OID20640	LAT	Inflammation	LAT	O43561	16	28984826	28990784	Linker for activation of T-cells family member 1
OID21292	LAT2	Oncology	LAT2	Q9GZY6	7	74199652	74229834	Linker for activation of T-cells family member 2
OID30523	LATS1	Inflammation_II	LATS1	O95835	6	149658153	149718105	Serine/threonine-protein kinase LATS1
OID20970	LAYN	Neurology	LAYN	Q6UX15	11	111540280	111561745	Layilin
OID20355	LBP	Cardiometabolic	LBP	P18428	20	38346482	38377013	Lipopolysaccharide-binding protein
OID21034	LBR	Neurology	LBR	Q14739	1	225401502	225428925	Delta(14)-sterol reductase LBR
OID30677	LCAT	Inflammation_II	LCAT	P04180	16	67939750	67944131	Phosphatidylcholine-sterol acyltransferase
OID31032	LCN15	Neurology_II	LCN15	Q6UWW0	9	136759634	136766255	Lipocalin-15
OID20392	LCN2	Cardiometabolic	LCN2	P80188	9	128149071	128153453	Neutrophil gelatinase-associated lipocalin
OID30367	LCP1	Cardiometabolic_II	LCP1	P13796	13	46125920	46211871	Plastin-2
OID20240	LDLR	Cardiometabolic	LDLR	P01130	19	11089462	11133820	Low-density lipoprotein receptor
OID31068	LDLRAP1	Neurology_II	LDLRAP1	Q5SW96	1	25543606	25568886	Low density lipoprotein receptor adapter protein 1
OID30320	LECT2	Cardiometabolic_II	LECT2	O14960	5	135922279	135954983	Leukocyte cell-derived chemotaxin-2
OID21454	LEFTY2	Oncology	LEFTY2	O00292	1	225936598	225941383	Left-right determination factor 2
OID30608	LEG1	Inflammation_II	C6orf58	Q6P5S2	6	127519455	127591820	Protein LEG1 homolog
OID30845	LELP1	Neurology_II	LELP1	Q5T871	1	153203430	153205120	Late cornified envelope-like proline-rich protein 1
OID30991	LEO1	Neurology_II	LEO1	Q8WVC0	15	51938025	51971778	RNA polymerase-associated protein LEO1
OID20187	LEP	Cardiometabolic	LEP	P41159	7	128241278	128257629	Leptin
OID20128	LEPR	Cardiometabolic	LEPR	P48357	1	65420652	65641559	Leptin receptor
OID31018	LETM1	Neurology_II	LETM1	O95202	4	1811479	1856156	Mitochondrial proton/calcium exchanger protein
OID20154	LGALS1	Cardiometabolic	LGALS1	P09382	22	37675636	37679802	Galectin-1
OID20284	LGALS3	Cardiometabolic	LGALS3	P17931	14	55124110	55145423	Galectin-3
OID30765	LGALS3BP	Inflammation_II	LGALS3BP	Q08380	17	78971238	78979947	Galectin-3-binding protein
OID20748	LGALS4	Inflammation	LGALS4	P56470	19	38801671	38812945	Galectin-4
OID21406	LGALS7_LGALS7B	Oncology	LGALS7B;LGALS7	P47929;P47929	19;19	38789200;38770968	38791754;38773517	Galectin-7
OID21041	LGALS8	Neurology	LGALS8	O00214	1	236518000	236552981	Galectin-8
OID20781	LGALS9	Inflammation	LGALS9	O00182	17	27629798	27649560	Galectin-9
OID20773	LGMN	Inflammation	LGMN	Q99538	14	92703807	92748679	Legumain
OID21248	LHB	Oncology	LHB	P01229	19	49015980	49017091	Lutropin subunit beta
OID20749	LHPP	Inflammation	LHPP	Q9H008	10	124461823	124617888	Phospholysine phosphohistidine inorganic pyrophosphate phosphatase
OID20824	LIF	Neurology	LIF	P15018	22	30240453	30246759	Leukemia inhibitory factor
OID20606	LIFR	Inflammation	LIFR	P42702	5	38474668	38608354	Leukemia inhibitory factor receptor
OID21152	LILRA2	Neurology	LILRA2	Q8N149	19	54572920	54590287	Leukocyte immunoglobulin-like receptor subfamily A member 2
OID30376	LILRA3	Cardiometabolic_II	LILRA3	Q8N6C8	19	54294163	54306461	Leukocyte immunoglobulin-like receptor subfamily A member 3
OID30162	LILRA4	Cardiometabolic_II	LILRA4	P59901	19	54333185	54339162	Leukocyte immunoglobulin-like receptor subfamily A member 4
OID20209	LILRA5	Cardiometabolic	LILRA5	A6NI73	19	54307070	54313166	Leukocyte immunoglobulin-like receptor subfamily A member 5
OID30346	LILRA6	Cardiometabolic_II	LILRA6	Q6PI73	19	54236592	54242791	Leukocyte immunoglobulin-like receptor subfamily A member 6
OID20323	LILRB1	Cardiometabolic	LILRB1	Q8NHL6	19	54617158	54638022	Leukocyte immunoglobulin-like receptor subfamily B member 1
OID20301	LILRB2	Cardiometabolic	LILRB2	Q8N423	19	54273812	54281184	Leukocyte immunoglobulin-like receptor subfamily B member 2
OID20429	LILRB4	Inflammation	LILRB4	Q8NHJ6	19	54643889	54670359	Leukocyte immunoglobulin-like receptor subfamily B member 4
OID20324	LILRB5	Cardiometabolic	LILRB5	O75023	19	54249421	54257301	Leukocyte immunoglobulin-like receptor subfamily B member 5
OID30266	LIPF	Cardiometabolic_II	LIPF	P07098	10	88664441	88678814	Gastric triacylglycerol lipase
OID31501	LMNB1	Oncology_II	LMNB1	P20700	5	126776623	126837020	Lamin-B1
OID31109	LMNB2	Neurology_II	LMNB2	Q03252	19	2427638	2456959	Lamin-B2
OID31416	LMOD1	Oncology_II	LMOD1	P29536	1	201896456	201946588	Leiomodin-1
OID30864	LMOD2	Neurology_II	LMOD2	Q6P5Q4	7	123655866	123664290	Leiomodin-2
OID30219	LONP1	Cardiometabolic_II	LONP1	P36776	19	5691834	5720572	Lon protease homolog, mitochondrial
OID30747	LPA	Inflammation_II	LPA	P08519	6	160531482	160664275	Apolipoprotein(a)
OID21290	LPCAT2	Oncology	LPCAT2	Q7L5N7	16	55509072	55586666	Lysophosphatidylcholine acyltransferase 2
OID20188	LPL	Cardiometabolic	LPL	P06858	8	19901717	19967259	Lipoprotein lipase
OID20963	LPO	Neurology	LPO	P22079	17	58218548	58268518	Lactoperoxidase
OID30190	LPP	Cardiometabolic_II	LPP	Q93052	3	188153284	188890671	Lipoma-preferred partner
OID30191	LRCH4	Cardiometabolic_II	LRCH4	O75427	7	100574011	100586129	Leucine-rich repeat and calponin homology domain-containing protein 4
OID30895	LRFN2	Neurology_II	LRFN2	Q9ULH4	6	40391591	40587364	Leucine-rich repeat and fibronectin type-III domain-containing protein 2
OID30751	LRG1	Inflammation_II	LRG1	P02750	19	4536402	4540036	Leucine-rich alpha-2-glycoprotein
OID21429	LRIG1	Oncology	LRIG1	Q96JA1	3	66378797	66501263	Leucine-rich repeats and immunoglobulin-like domains protein 1
OID30450	LRIG3	Inflammation_II	LRIG3	Q6UXM1	12	58872149	58920504	Leucine-rich repeats and immunoglobulin-like domains protein 3
OID21293	LRP1	Oncology	LRP1	Q07954	12	57128483	57213361	Prolow-density lipoprotein receptor-related protein 1
OID20185	LRP11	Cardiometabolic	LRP11	Q86VZ4	6	149818757	149864359	Low-density lipoprotein receptor-related protein 11
OID30960	LRP2	Neurology_II	LRP2	P98164	2	169127109	169362534	Low-density lipoprotein receptor-related protein 2
OID30907	LRP2BP	Neurology_II	LRP2BP	Q9P2M1	4	185363872	185395924	LRP2-binding protein
OID21059	LRPAP1	Neurology	LRPAP1	P30533	4	3503612	3532446	Alpha-2-macroglobulin receptor-associated protein
OID21333	LRRC25	Oncology	LRRC25	Q8N386	19	18391137	18397622	Leucine-rich repeat-containing protein 25
OID31440	LRRC37A2	Oncology_II	LRRC37A2	A6NM11	17	46511508	46556910	Leucine-rich repeat-containing protein 37A2
OID30924	LRRC38	Neurology_II	LRRC38	Q5VT99	1	13474973	13514003	Leucine-rich repeat-containing protein 38
OID30361	LRRC59	Cardiometabolic_II	LRRC59	Q96AG4	17	50375059	50397523	Leucine-rich repeat-containing protein 59
OID31344	LRRFIP1	Oncology_II	LRRFIP1	Q32MZ4	2	237627587	237813682	Leucine-rich repeat flightless-interacting protein 1
OID20438	LRRN1	Inflammation	LRRN1	Q6UXK5	3	3799431	3849834	Leucine-rich repeat neuronal protein 1
OID30906	LRTM1	Neurology_II	LRTM1	Q9HBL6	3	54918231	54967088	Leucine-rich repeat and transmembrane domain-containing protein 1
OID31020	LRTM2	Neurology_II	LRTM2	Q8N967	12	1820267	1836753	Leucine-rich repeat and transmembrane domain-containing protein 2
OID21210	LSM1	Oncology	LSM1	O15116	8	38163335	38176730	U6 snRNA-associated Sm-like protein LSm1
OID31269	LSM8	Oncology_II	LSM8	O95777	7	118184144	118204035	U6 snRNA-associated Sm-like protein LSm8
OID20530	LSP1	Inflammation	LSP1	P33241	11	1850904	1892267	Lymphocyte-specific protein 1
OID20586	LTA	Inflammation	LTA	P01374	6	31572054	31574324	Lymphotoxin-alpha
OID21452	LTA4H	Oncology	LTA4H	P09960	12	96000753	96043520	Leukotriene A-4 hydrolase
OID31383	LTB	Oncology_II	LTB	Q06643	6	31580525	31582522	Lymphotoxin-beta
OID20254	LTBP2	Cardiometabolic	LTBP2	Q14767	14	74498183	74612378	Latent-transforming growth factor beta-binding protein 2
OID21191	LTBP3	Oncology	LTBP3	Q9NS15	11	65538559	65558930	Latent-transforming growth factor beta-binding protein 3
OID20768	LTBR	Inflammation	LTBR	P36941	12	6375045	6391571	Tumor necrosis factor receptor superfamily member 3
OID20434	LTO1	Inflammation	LTO1	Q8WV07	11	69653076	69675416	Protein LTO1 homolog
OID31402	LUZP2	Oncology_II	LUZP2	Q86TE4	11	24496970	25082638	Leucine zipper protein 2
OID21003	LXN	Neurology	LXN	Q9BS40	3	158645822	158672648	Latexin
OID20708	LY6D	Inflammation	LY6D	Q14210	8	142784882	142786539	Lymphocyte antigen 6D
OID20580	LY75	Inflammation	LY75	O60449	2	159803355	159904756	Lymphocyte antigen 75
OID20670	LY9	Inflammation	LY9	Q9HBG7	1	160796074	160828261	T-lymphocyte surface antigen Ly-9
OID20945	LY96	Neurology	LY96	Q9Y6Y9	8	73991392	74029079	Lymphocyte antigen 96
OID21264	LYAR	Oncology	LYAR	Q9NX58	4	4267701	4290154	Cell growth-regulating nucleolar protein
OID21350	LYN	Oncology	LYN	P07948	8	55879835	56014169	Tyrosine-protein kinase Lyn
OID20821	LYPD1	Neurology	LYPD1	Q8N2G4	2	132643286	132671579	Ly6/PLAUR domain-containing protein 1
OID21530	LYPD3	Oncology	LYPD3	O95274	19	43460787	43465608	Ly6/PLAUR domain-containing protein 3
OID21251	LYPD8	Oncology	LYPD8	Q6UX82	1	248739415	248755759	Ly6/PLAUR domain-containing protein 8
OID30817	LYPLA2	Neurology_II	LYPLA2	O95372	1	23791145	23795539	Acyl-protein thioesterase 2
OID30950	LYSMD3	Neurology_II	LYSMD3	Q7Z3D4	5	90515611	90529584	LysM and putative peptidoglycan-binding domain-containing protein 3
OID30728	LYVE1	Inflammation_II	LYVE1	Q9Y5Y7	11	10556966	10611689	Lymphatic vessel endothelial hyaluronic acid receptor 1
OID31180	LYZL2	Oncology_II	LYZL2	Q7Z4W2	10	30611779	30629762	Lysozyme-like protein 2
OID30637	LZTFL1	Inflammation_II	LZTFL1	Q9NQ48	3	45823316	45916042	Leucine zipper transcription factor-like protein 1
OID30208	M6PR	Cardiometabolic_II	M6PR	P20645	12	8940361	8949761	Cation-dependent mannose-6-phosphate receptor
OID20904	MAD1L1	Neurology	MAD1L1	Q9Y6D9	7	1815793	2233243	Mitotic spindle assembly checkpoint protein MAD1
OID21206	MAEA	Oncology	MAEA	Q7L5Y9	4	1289887	1340147	E3 ubiquitin-protein transferase MAEA
OID30967	MAG	Neurology_II	MAG	P20916	19	35292125	35313807	Myelin-associated glycoprotein
OID31331	MAGEA3	Oncology_II	MAGEA3	P43357	X	152698767	152702347	Melanoma-associated antigen 3
OID21181	MAGED1	Oncology	MAGED1	Q9Y5V3	X	51803007	51902354	Melanoma-associated antigen D1
OID30309	MAMDC2	Cardiometabolic_II	MAMDC2	Q7Z304	9	70043848	70226972	MAM domain-containing protein 2
OID31342	MAMDC4	Oncology_II	MAMDC4	Q6UXC1	9	136850943	136860799	Apical endosomal glycoprotein
OID30262	MAN1A2	Cardiometabolic_II	MAN1A2	O60476	1	117367449	117528872	Mannosyl-oligosaccharide 1,2-alpha-mannosidase IB
OID30306	MAN2B2	Cardiometabolic_II	MAN2B2	Q9Y2E5	4	6575189	6623362	Epididymis-specific alpha-mannosidase
OID31244	MANEAL	Oncology_II	MANEAL	Q5VSG8	1	37793847	37801137	Glycoprotein endo-alpha-1,2-mannosidase-like protein
OID20707	MANF	Inflammation	MANF	P55145	3	51385291	51389397	Mesencephalic astrocyte-derived neurotrophic factor
OID21492	MANSC1	Oncology	MANSC1	Q9H8J5	12	12326056	12350242	MANSC domain-containing protein 1
OID30141	MANSC4	Cardiometabolic_II	MANSC4	A6NHS7	12	27762427	27780236	MANSC domain-containing protein 4
OID30868	MAP1LC3A	Neurology_II	MAP1LC3A	Q9H492	20	34546854	34560345	Microtubule-associated proteins 1A/1B light chain 3A
OID30074	MAP1LC3B2	Cardiometabolic_II	MAP1LC3B2	A6NCE7	12	116548105	116576606	Microtubule-associated proteins 1A/1B light chain 3 beta 2
OID31138	MAP2	Neurology_II	MAP2	P11137	2	209424047	209734147	Microtubule-associated protein 2
OID31468	MAP2K1	Oncology_II	MAP2K1	Q02750	15	66386837	66491656	Dual specificity mitogen-activated protein kinase kinase 1
OID20552	MAP2K6	Inflammation	MAP2K6	P52564	17	69414697	69553865	Dual specificity mitogen-activated protein kinase kinase 6
OID21253	MAP3K5	Oncology	MAP3K5	Q99683	6	136557046	136792477	Mitogen-activated protein kinase kinase kinase 5
OID20899	MAP4K5	Neurology	MAP4K5	Q9Y4K4	14	50418501	50561126	Mitogen-activated protein kinase kinase kinase kinase 5
OID31205	MAPK13	Oncology_II	MAPK13	O15264	6	36127809	36144524	Mitogen-activated protein kinase 13
OID20557	MAPK9	Inflammation	MAPK9	P45984	5	180233143	180292099	Mitogen-activated protein kinase 9
OID31293	MAPKAPK2	Oncology_II	MAPKAPK2	P49137	1	206684905	206734281	MAP kinase-activated protein kinase 2
OID31177	MAPRE3	Oncology_II	MAPRE3	Q9UPY8	2	26970637	27027219	Microtubule-associated protein RP/EB family member 3
OID20830	MAPT	Neurology	MAPT	P10636	17	45894527	46028334	Microtubule-associated protein tau
OID20210	MARCO	Cardiometabolic	MARCO	Q9UEW3	2	118942194	118994660	Macrophage receptor MARCO
OID30658	MARS1	Inflammation_II	MARS1	P56192	12	57475445	57517569	Methionine--tRNA ligase, cytoplasmic
OID20954	MASP1	Neurology	MASP1	P48740	3	187217282	187291980	Mannan-binding lectin serine protease 1
OID20767	MATN2	Inflammation	MATN2	O00339	8	97868840	98036724	Matrilin-2
OID20979	MATN3	Neurology	MATN3	O15232	2	19992052	20012668	Matrilin-3
OID21204	MAVS	Oncology	MAVS	Q7Z434	20	3846799	3876123	Mitochondrial antiviral-signaling protein
OID20877	MAX	Neurology	MAX	P61244	14	65006174	65102695	Protein max
OID20263	MB	Cardiometabolic	MB	P02144	22	35606764	35637951	Myoglobin
OID30759	MBL2	Inflammation_II	MBL2	P11226	10	52765380	52772784	Mannose-binding protein C
OID20343	MCAM	Cardiometabolic	MCAM	P43121	11	119308529	119321521	Cell surface glycoprotein MUC18
OID31033	MCEE	Neurology_II	MCEE	Q96PE7	2	71109684	71130239	Methylmalonyl-CoA epimerase, mitochondrial
OID30501	MCEMP1	Inflammation_II	MCEMP1	Q8IX19	19	7677088	7679829	Mast cell-expressed membrane protein 1
OID20171	MCFD2	Cardiometabolic	MCFD2	Q8NI22	2	46901870	46941855	Multiple coagulation factor deficiency protein 2
OID31444	MCTS1	Oncology_II	MCTS1	Q9ULC4	X	120594010	120621159	Malignant T-cell-amplified sequence 1
OID20951	MDGA1	Neurology	MDGA1	Q8NFP4	6	37630679	37699306	MAM domain-containing glycosylphosphatidylinositol anchor protein 1
OID30669	MDH1	Inflammation_II	MDH1	P40925	2	63588609	63607197	Malate dehydrogenase, cytoplasmic
OID21489	MDK	Oncology	MDK	P21741	11	46380756	46383837	Midkine
OID30945	MDM1	Neurology_II	MDM1	Q8TC05	12	68272443	68332381	Nuclear protein MDM1
OID30274	MECR	Cardiometabolic_II	MECR	Q9BV79	1	29192657	29230942	Enoyl-[acyl-carrier-protein] reductase, mitochondrial
OID21236	MED18	Oncology	MED18	Q9BUE0	1	28329002	28335965	Mediator of RNA polymerase II transcription subunit 18
OID30066	MED21	Cardiometabolic_II	MED21	Q13503	12	27022546	27066343	Mediator of RNA polymerase II transcription subunit 21
OID20746	MEGF10	Inflammation	MEGF10	Q96KG7	5	127290796	127465737	Multiple epidermal growth factor-like domains protein 10
OID30099	MEGF11	Cardiometabolic_II	MEGF11	A6BM72	15	65895079	66253756	Multiple epidermal growth factor-like domains protein 11
OID20285	MEGF9	Cardiometabolic	MEGF9	Q9H1U4	9	120600811	120714470	Multiple epidermal growth factor-like domains protein 9
OID30347	MELTF	Cardiometabolic_II	MELTF	P08582	3	196980590	197029835	Melanotransferrin
OID30595	MENT	Inflammation_II	C1orf56	Q9BUN1	1	151047751	151051986	Protein MENT
OID31459	MEP1A	Oncology_II	MEP1A	Q16819	6	46793389	46839778	Meprin A subunit alpha
OID20168	MEP1B	Cardiometabolic	MEP1B	Q16820	18	32185069	32220404	Meprin A subunit beta
OID20753	MEPE	Inflammation	MEPE	Q9NQ76	4	87821398	87846814	Matrix extracellular phosphoglycoprotein
OID20657	MERTK	Inflammation	MERTK	Q12866	2	111898607	112029561	Tyrosine-protein kinase Mer
OID21099	MESD	Neurology	MESD	Q14696	15	80946289	80989828	LRP chaperone MESD
OID20269	MET	Cardiometabolic	MET	P08581	7	116672196	116798377	Hepatocyte growth factor receptor
OID20815	METAP1	Neurology	METAP1	P53582	4	98995659	99062809	Methionine aminopeptidase 1
OID20519	METAP1D	Inflammation	METAP1D	Q6UB28	2	171999943	172082430	Methionine aminopeptidase 1D, mitochondrial
OID21437	METAP2	Oncology	METAP2	P50579	12	95473520	95515839	Methionine aminopeptidase 2
OID20057	MFAP3	Cardiometabolic	MFAP3	P55082	5	154038959	154220478	Microfibril-associated glycoprotein 3
OID30933	MFAP3L	Neurology_II	MFAP3L	O75121	4	169986597	170033031	Microfibrillar-associated protein 3-like
OID30598	MFAP4	Inflammation_II	MFAP4	P55083	17	19383442	19387190	Microfibril-associated glycoprotein 4
OID20239	MFAP5	Cardiometabolic	MFAP5	Q13361	12	8637346	8662888	Microfibrillar-associated protein 5
OID21134	MFGE8	Neurology	MFGE8	Q08431	15	88898683	88913381	Lactadherin
OID20711	MGLL	Inflammation	MGLL	Q99685	3	127689062	128052190	Monoglyceride lipase
OID20588	MGMT	Inflammation	MGMT	P16455	10	129467190	129770983	Methylated-DNA--protein-cysteine methyltransferase
OID21531	MIA	Oncology	MIA	Q16674	19	40771648	40777490	Melanoma-derived growth regulatory protein
OID30889	MICALL2	Neurology_II	MICALL2	Q8IY33	7	1428465	1459470	MICAL-like protein 2
OID20593	MICB_MICA	Inflammation	MICB;MICA	Q29980;Q29983	6;6	31494881;31399784	31511124;31415315	MHC class I polypeptide-related sequence A_MHC class I polypeptide-related sequence B
OID21073	MIF	Neurology	MIF	P14174	22	23894383	23895227	Macrophage migration inhibitory factor
OID20482	MILR1	Inflammation	MILR1	Q7Z6M3	17	64449037	64468643	Allergin-1
OID31399	MINDY1	Oncology_II	MINDY1	Q8N5J2	1	150996549	151008376	Ubiquitin carboxyl-terminal hydrolase MINDY-1
OID31156	MINK1	Neurology_II	MINK1	Q8N4C8	17	4833340	4898061	Misshapen-like kinase 1
OID20959	MITD1	Neurology	MITD1	Q8WV92	2	99161427	99181058	MIT domain-containing protein 1
OID30455	MKI67	Inflammation_II	MKI67	P46013	10	128096659	128126423	Proliferation marker protein Ki-67
OID31211	MLLT1	Oncology_II	MLLT1	Q03111	19	6210381	6279975	Protein ENL
OID20541	MLN	Inflammation	MLN	P12872	6	33794673	33804003	Promotilin
OID21307	MME	Oncology	MME	P08473	3	155024124	155183704	Neprilysin
OID20672	MMP1	Inflammation	MMP1	P03956	11	102789401	102798160	Interstitial collagenase
OID20687	MMP10	Inflammation	MMP10	P09238	11	102770502	102780628	Stromelysin-2
OID21439	MMP12	Oncology	MMP12	P39900	11	102862736	102874982	Macrophage metalloelastase
OID20807	MMP13	Neurology	MMP13	P45452	11	102942995	102955732	Collagenase 3
OID30299	MMP15	Cardiometabolic_II	MMP15	P51511	16	58025754	58046901	Matrix metalloproteinase-15
OID21083	MMP3	Neurology	MMP3	P08254	11	102835801	102843609	Stromelysin-1
OID20087	MMP7	Cardiometabolic	MMP7	P09237	11	102520508	102530750	Matrilysin
OID21019	MMP8	Neurology	MMP8	P22894	11	102711796	102727050	Neutrophil collagenase
OID21103	MMP9	Neurology	MMP9	P14780	20	46008908	46016561	Matrix metalloproteinase-9
OID30159	MMUT	Cardiometabolic_II	MMUT	P22033	6	49430360	49463253	Methylmalonyl-CoA mutase, mitochondrial
OID30908	MN1	Neurology_II	MN1	Q10571	22	27748277	27801756	Transcriptional activator MN1
OID31327	MNAT1	Oncology_II	MNAT1	P51948	14	60734742	60969965	CDK-activating kinase assembly factor MAT1
OID20156	MNDA	Cardiometabolic	MNDA	P41218	1	158831351	158849506	Myeloid cell nuclear differentiation antigen
OID30638	MOCS2	Inflammation_II	MOCS2	O96007	5	53095679	53110063	Molybdopterin synthase catalytic subunit
OID21384	MOG	Oncology	MOG	Q16653	6	29657002	29672372	Myelin-oligodendrocyte glycoprotein
OID31073	MORC3	Neurology_II	MORC3	Q14149	21	36320189	36386148	MORC family CW-type zinc finger protein 3
OID31257	MORF4L1	Oncology_II	MORF4L1	Q9UBU8	15	78810487	78898139	Mortality factor 4-like protein 1
OID31160	MORF4L2	Oncology_II	MORF4L2	Q15014	X	103675496	103688158	Mortality factor 4-like protein 2
OID31217	MORN4	Oncology_II	MORN4	Q8NDC4	10	97614553	97633500	MORN repeat-containing protein 4
OID20092	MPHOSPH8	Cardiometabolic	MPHOSPH8	Q99549	13	19633659	19673441	M-phase phosphoprotein 8
OID21288	MPI	Oncology	MPI	P34949	15	74890005	74902219	Mannose-6-phosphate isomerase
OID20779	MPIG6B	Inflammation	MPIG6B	O95866	6	31718594	31726714	Megakaryocyte and platelet inhibitory receptor G6b
OID21100	MPO	Neurology	MPO	P05164	17	58269855	58280935	Myeloperoxidase
OID31420	MPRIP	Oncology_II	MPRIP	Q6WCQ1	17	17042457	17217679	Myosin phosphatase Rho-interacting protein
OID30694	MRC1	Inflammation_II	MRC1	P22897	10	17809348	17911164	Macrophage mannose receptor 1
OID30891	MRI1	Neurology_II	MRI1	Q9BV20	19	13764522	13774282	Methylthioribose-1-phosphate isomerase
OID30178	MRPL24	Cardiometabolic_II	MRPL24	Q96A35	1	156737303	156741590	39S ribosomal protein L24, mitochondrial
OID31023	MRPL28	Neurology_II	MRPL28	Q13084	16	366969	371289	39S ribosomal protein L28, mitochondrial
OID20858	MRPL46	Neurology	MRPL46	Q9H2W6	15	88459477	88467390	39S ribosomal protein L46, mitochondrial
OID31239	MRPL52	Oncology_II	MRPL52	Q86TS9	14	22829879	22835037	39S ribosomal protein L52, mitochondrial
OID31036	MRPL58	Neurology_II	MRPL58	Q14197	17	75012670	75021261	Peptidyl-tRNA hydrolase ICT1, mitochondrial
OID30489	MRPS16	Inflammation_II	MRPS16	Q9Y3D3	10	73248843	73252693	28S ribosomal protein S16, mitochondrial
OID21380	MSLN	Oncology	MSLN	Q13421	16	760734	768865	Mesothelin
OID30939	MSLNL	Neurology_II	MSLNL	Q96KJ4	16	769428	783370	Mesothelin-like protein
OID20275	MSMB	Cardiometabolic	MSMB	P08118	10	46033307	46048180	Beta-microseminoprotein
OID21063	MSR1	Neurology	MSR1	P21757	8	16107878	16567490	Macrophage scavenger receptor types I and II
OID21513	MSRA	Oncology	MSRA	Q9UJ68	8	10054292	10428891	Mitochondrial peptide methionine sulfoxide reductase
OID30713	MST1	Inflammation_II	MST1	P26927	3	49683947	49689501	Hepatocyte growth factor-like protein
OID20115	MSTN	Cardiometabolic	MSTN	O14793	2	190055700	190062729	Growth/differentiation factor 8
OID30538	MTDH	Inflammation_II	MTDH	Q86UE4	8	97644184	97730260	Protein LYRIC
OID31078	MTHFD2	Neurology_II	MTHFD2	P13995	2	74186172	74217565	Bifunctional methylenetetrahydrofolate dehydrogenase/cyclohydrolase, mitochondrial
OID31305	MTHFSD	Oncology_II	MTHFSD	Q2M296	16	86530178	86555235	Methenyltetrahydrofolate synthase domain-containing protein
OID31513	MTIF3	Oncology_II	MTIF3	Q9H2K0	13	27435643	27450591	Translation initiation factor IF-3, mitochondrial
OID20080	MTPN	Cardiometabolic	MTPN	P58546	7	135926760	135977359	Myotrophin
OID30110	MTR	Cardiometabolic_II	MTR	Q99707	1	236795260	236921278	Methionine synthase
OID31492	MTSS1	Oncology_II	MTSS1	O43312	8	124550784	124728473	Protein MTSS 1
OID31409	MTSS2	Oncology_II	MTSS2	Q765P7	16	70661204	70686053	Protein MTSS 2
OID31315	MTUS1	Oncology_II	MTUS1	Q9ULD2	8	17643795	17801094	Microtubule-associated tumor suppressor 1
OID20866	MUC13	Neurology	MUC13	Q9H3R2	3	124905442	124953819	Mucin-13
OID21378	MUC16	Oncology	MUC16	Q8WXI7	19	8848844	8981342	Mucin-16
OID30377	MUC2	Cardiometabolic_II	MUC2	Q02817	11	1074875	1110511	Mucin-2
OID31170	MUCL3	Oncology_II	MUCL3	Q3MIW9	6	30934523	30954221	Mucin-like protein 3
OID20459	MVK	Inflammation	MVK	Q03426	12	109573255	109598125	Mevalonate kinase
OID30583	MXRA8	Inflammation_II	MXRA8	Q9BRK3	1	1352689	1361777	Matrix remodeling-associated protein 8
OID30296	MYBPC1	Cardiometabolic_II	MYBPC1	Q00872	12	101568353	101686028	Myosin-binding protein C, slow-type
OID30199	MYBPC2	Cardiometabolic_II	MYBPC2	Q14324	19	50432892	50466321	Myosin-binding protein C, fast-type
OID30996	MYCBP2	Neurology_II	MYCBP2	O75592	13	77042474	77327094	E3 ubiquitin-protein ligase MYCBP2
OID30313	MYDGF	Cardiometabolic_II	MYDGF	Q969H8	19	4641374	4670362	Myeloid-derived growth factor
OID30061	MYH4	Cardiometabolic_II	MYH4	Q9Y623	17	10443290	10469559	Myosin-4
OID31178	MYH7B	Oncology_II	MYH7B	A7E2Y1	20	34955810	35002437	Myosin-7B
OID30382	MYH9	Cardiometabolic_II	MYH9	P35579	22	36281280	36388010	Myosin-9
OID30120	MYL1	Cardiometabolic_II	MYL1	P05976	2	210290150	210315174	Myosin light chain 1/3, skeletal muscle isoform
OID30251	MYL3	Cardiometabolic_II	MYL3	P08590	3	46835111	46882172	Myosin light chain 3
OID30245	MYL4	Cardiometabolic_II	MYL4	P12829	17	47200446	47223679	Myosin light chain 4
OID30936	MYL6B	Neurology_II	MYL6B	P14649	12	56152256	56159647	Myosin light chain 6B
OID30917	MYLPF	Neurology_II	MYL11	Q96A32	16	30370934	30377991	Myosin regulatory light chain 2, skeletal muscle isoform
OID30989	MYO6	Neurology_II	MYO6	Q9UM54	6	75749201	75919537	Unconventional myosin-VI
OID20451	MYO9B	Inflammation	MYO9B	Q13459	19	17075777	17214537	Unconventional myosin-IXb
OID21121	MYOC	Neurology	MYOC	Q99972	1	171635417	171652688	Myocilin
OID30834	MYOM1	Neurology_II	MYOM1	P52179	18	3066807	3219968	Myomesin-1
OID30131	MYOM2	Cardiometabolic_II	MYOM2	P54296	8	2045046	2165552	Myomesin-2
OID30633	MYOM3	Inflammation_II	MYOM3	Q5VTT5	1	24056035	24112135	Myomesin-3
OID20732	MZB1	Inflammation	MZB1	Q8WU39	5	139387467	139390081	Marginal zone B- and B1-cell-specific protein
OID21186	MZT1	Oncology	MZT1	Q08AG7	13	72708367	72727629	Mitotic-spindle organizing protein 1
OID30188	NAA10	Cardiometabolic_II	NAA10	P41227	X	153929225	153935080	N-alpha-acetyltransferase 10
OID30893	NAA80	Neurology_II	NAA80	Q93015	3	50296402	50299416	N-alpha-acetyltransferase 80
OID20931	NAAA	Neurology	NAAA	Q02083	4	75913660	75941013	N-acylethanolamine-hydrolyzing acid amidase
OID31393	NACC1	Oncology_II	NACC1	Q96RE7	19	13116862	13141147	Nucleus accumbens-associated protein 1
OID20178	NADK	Cardiometabolic	NADK	O95544	1	1751232	1780457	NAD kinase
OID30509	NAGA	Inflammation_II	NAGA	P17050	22	42058334	42070842	Alpha-N-acetylgalactosaminidase
OID30271	NAGK	Cardiometabolic_II	NAGK	Q9UJ70	2	71064344	71079808	N-acetyl-D-glucosamine kinase
OID30643	NAGPA	Inflammation_II	NAGPA	Q9UK23	16	5024844	5034141	N-acetylglucosamine-1-phosphodiester alpha-N-acetylglucosaminidase
OID21227	NAMPT	Oncology	NAMPT	P43490	7	106248298	106285966	Nicotinamide phosphoribosyltransferase
OID31475	NAP1L4	Oncology_II	NAP1L4	Q99733	11	2944431	2992377	Nucleosome assembly protein 1-like 4
OID31114	NAPRT	Neurology_II	NAPRT	Q6XQN6	8	143574785	143578649	Nicotinate phosphoribosyltransferase
OID31035	NARS1	Neurology_II	NARS1	O43776	18	57600656	57622213	Asparagine--tRNA ligase, cytoplasmic
OID21486	NBL1	Oncology	NBL1	P41271	1	19596979	19658456	Neuroblastoma suppressor of tumorigenicity 1
OID20442	NBN	Inflammation	NBN	O60934	8	89933331	90003228	Nibrin
OID20354	NCAM1	Cardiometabolic	NCAM1	P13591	11	112961247	113278436	Neural cell adhesion molecule 1
OID21095	NCAM2	Neurology	NCAM2	O15394	21	20998409	21543329	Neural cell adhesion molecule 2
OID21055	NCAN	Neurology	NCAN	O14594	19	19211958	19252233	Neurocan core protein
OID20567	NCF2	Inflammation	NCF2	P19878	1	183555562	183590876	Neutrophil cytosol factor 2
OID20683	NCK2	Inflammation	NCK2	O43639	2	105744912	105894274	Cytoplasmic protein NCK2
OID20448	NCLN	Inflammation	NCLN	Q969V3	19	3185563	3209575	Nicalin
OID20566	NCR1	Inflammation	NCR1	O76036	19	54906148	54916140	Natural cytotoxicity triggering receptor 1
OID31490	NCR3LG1	Oncology_II	NCR3LG1	Q68D85	11	17351800	17377341	Natural cytotoxicity triggering receptor 3 ligand 1
OID21458	NCS1	Oncology	NCS1	P62166	9	130172404	130237303	Neuronal calcium sensor 1
OID20792	NDRG1	Neurology	NDRG1	Q92597	8	133237175	133302022	Protein NDRG1
OID31369	NDST1	Oncology_II	NDST1	P52848	5	150485818	150558211	Bifunctional heparan sulfate N-deacetylase/N-sulfotransferase 1
OID30520	NDUFA5	Inflammation_II	NDUFA5	Q16718	7	123536997	123557904	NADH dehydrogenase [ubiquinone] 1 alpha subcomplex subunit 5
OID31521	NDUFB7	Oncology_II	NDUFB7	P17568	19	14566078	14572066	NADH dehydrogenase [ubiquinone] 1 beta subcomplex subunit 7
OID21224	NDUFS6	Oncology	NDUFS6	O75380	5	1801407	1816048	NADH dehydrogenase [ubiquinone] iron-sulfur protein 6, mitochondrial
OID30105	NEB	Cardiometabolic_II	NEB	P20929	2	151485336	151734487	Nebulin
OID30089	NECAP2	Cardiometabolic_II	NECAP2	Q9NVZ3	1	16440721	16460078	Adaptin ear-binding coat-associated protein 2
OID30545	NECTIN1	Inflammation_II	NECTIN1	Q15223	11	119623408	119729200	Nectin-1
OID20222	NECTIN2	Cardiometabolic	NECTIN2	Q92692	19	44846175	44889223	Nectin-2
OID21490	NECTIN4	Oncology	NECTIN4	Q96NY8	1	161070998	161089558	Nectin-4
OID30521	NEDD4L	Inflammation_II	NEDD4L	Q96PU5	18	58044226	58401540	E3 ubiquitin-protein ligase NEDD4-like
OID30503	NEDD9	Inflammation_II	NEDD9	Q14511	6	11183298	11382348	Enhancer of filamentation 1
OID20871	NEFL	Neurology	NEFL	P07196	8	24950955	24956721	Neurofilament light polypeptide
OID31250	NEK7	Oncology_II	NEK7	Q8TDX7	1	198156994	198322420	Serine/threonine-protein kinase Nek7
OID21494	NELL1	Oncology	NELL1	Q92832	11	20669551	21575686	Protein kinase C-binding protein NELL1
OID20706	NELL2	Inflammation	NELL2	Q99435	12	44508275	44921848	Protein kinase C-binding protein NELL2
OID31354	NENF	Oncology_II	NENF	Q9UMX5	1	212432920	212446379	Neudesin
OID31066	NEO1	Neurology_II	NEO1	Q92859	15	73051710	73305205	Neogenin
OID30678	NEXN	Inflammation_II	NEXN	Q0ZGT2	1	77888513	77943895	Nexilin
OID20634	NFASC	Inflammation	NFASC	O94856	1	204828651	205022822	Neurofascin
OID30522	NFAT5	Inflammation_II	NFAT5	O94916	16	69565094	69704666	Nuclear factor of activated T-cells 5
OID20545	NFATC1	Inflammation	NFATC1	O95644	18	79395856	79529325	Nuclear factor of activated T-cells, cytoplasmic 1
OID20470	NFATC3	Inflammation	NFATC3	Q12968	16	68084751	68229259	Nuclear factor of activated T-cells, cytoplasmic 3
OID30268	NFE2	Cardiometabolic_II	NFE2	Q16621	12	54292111	54301015	Transcription factor NF-E2 45 kDa subunit
OID30988	NFIC	Neurology_II	NFIC	P08651	19	3314403	3469217	Nuclear factor 1 C-type
OID30160	NFKB1	Cardiometabolic_II	NFKB1	P19838	4	102501330	102617302	Nuclear factor NF-kappa-B p105 subunit
OID31258	NFKB2	Oncology_II	NFKB2	Q00653	10	102394110	102402524	Nuclear factor NF-kappa-B p100 subunit
OID21212	NFKBIE	Oncology	NFKBIE	O00221	6	44258166	44265788	NF-kappa-B inhibitor epsilon
OID31510	NFU1	Oncology_II	NFU1	Q9UMS0	2	69396113	69437628	NFU1 iron-sulfur cluster scaffold homolog, mitochondrial
OID30158	NFX1	Cardiometabolic_II	NFX1	Q12986	9	33290512	33371157	Transcriptional repressor NF-X1
OID30134	NFYA	Cardiometabolic_II	NFYA	P23511	6	41072974	41102403	Nuclear transcription factor Y subunit alpha
OID20920	NGF	Neurology	NGF	P01138	1	115285904	115338770	Beta-nerve growth factor
OID30300	NGFR	Cardiometabolic_II	NGFR	P08138	17	49495293	49515008	Tumor necrosis factor receptor superfamily member 16
OID31115	NGRN	Neurology_II	NGRN	Q9NPE2	15	90265659	90275778	Neugrin
OID30614	NHLRC3	Inflammation_II	NHLRC3	Q5JS37	13	39038306	39050109	NHL repeat-containing protein 3
OID20362	NID1	Cardiometabolic	NID1	P14543	1	235975830	236065109	Nidogen-1
OID21085	NID2	Neurology	NID2	Q14112	14	52004809	52069059	Nidogen-2
OID21167	NINJ1	Oncology	NINJ1	Q92982	9	93121496	93134251	Ninjurin-1
OID30252	NIT1	Cardiometabolic_II	NIT1	Q86X76	1	161118086	161125445	Deaminated glutathione amidase
OID30336	NIT2	Cardiometabolic_II	NIT2	Q9NQR4	3	100334739	100361635	Omega-amidase NIT2
OID30900	NLGN1	Neurology_II	NLGN1	Q8N2Q7	3	173396284	174294372	Neuroligin-1
OID30878	NLGN2	Neurology_II	NLGN2	Q8NFZ4	17	7404874	7419860	Neuroligin-2
OID30451	NME1	Inflammation_II	NME1	P15531	17	51153559	51162428	Nucleoside diphosphate kinase A
OID20789	NME3	Inflammation	NME3	Q13232	16	1770320	1771561	Nucleoside diphosphate kinase 3
OID31378	NMI	Oncology_II	NMI	Q13287	2	151270470	151289894	N-myc-interactor
OID20913	NMNAT1	Neurology	NMNAT1	Q9HAN9	1	9943428	9985501	Nicotinamide/nicotinic acid mononucleotide adenylyltransferase 1
OID31163	NMRK2	Oncology_II	NMRK2	Q9NPI5	19	3933069	3942416	Nicotinamide riboside kinase 2
OID31021	NMT1	Neurology_II	NMT1	P30419	17	44957992	45109016	Glycylpeptide N-tetradecanoyltransferase 1
OID21106	NOMO1	Neurology	NOMO1	Q15155	16	14833721	14896157	Nodal modulator 1
OID30055	NOP56	Cardiometabolic_II	NOP56	O00567	20	2652593	2658393	Nucleolar protein 56
OID20863	NOS1	Neurology	NOS1	P29475	12	117208142	117452170	Nitric oxide synthase, brain
OID30087	NOS2	Cardiometabolic_II	NOS2	P35228	17	27756766	27800529	Nitric oxide synthase, inducible
OID20834	NOS3	Neurology	NOS3	P29474	7	150991017	151014588	Nitric oxide synthase, endothelial
OID20311	NOTCH1	Cardiometabolic	NOTCH1	P46531	9	136494433	136546048	Neurogenic locus notch homolog protein 1
OID30407	NOTCH2	Cardiometabolic_II	NOTCH2	Q04721	1	119911553	120100779	Neurogenic locus notch homolog protein 2
OID20253	NOTCH3	Cardiometabolic	NOTCH3	Q9UM47	19	15159038	15200995	Neurogenic locus notch homolog protein 3
OID30418	NPC2	Cardiometabolic_II	NPC2	P61916	14	74476192	74494177	NPC intracellular cholesterol transporter 2
OID20205	NPDC1	Cardiometabolic	NPDC1	Q9NQX5	9	137039463	137046179	Neural proliferation differentiation and control protein 1
OID30540	NPHS1	Inflammation_II	NPHS1	O60500	19	35825372	35869287	Nephrin
OID30462	NPHS2	Inflammation_II	NPHS2	Q9NP85	1	179550539	179575952	Podocin
OID30329	NPL	Cardiometabolic_II	NPL	Q9BXD5	1	182789293	182830384	N-acetylneuraminate lyase
OID20961	NPM1	Neurology	NPM1	P06748	5	171387116	171411810	Nucleophosmin
OID20049	NPPB	Cardiometabolic	NPPB	P16860	1	11857464	11858945	Natriuretic peptides B
OID20568	NPPC	Inflammation	NPPC	P23582	2	231921809	231926396	C-type natriuretic peptide
OID30116	NPR1	Cardiometabolic_II	NPR1	P16066	1	153678688	153693992	Atrial natriuretic peptide receptor 1
OID21235	NPTN	Oncology	NPTN	Q9Y639	15	73560014	73634134	Neuroplastin
OID21074	NPTX1	Neurology	NPTX1	Q15818	17	80466834	80477843	Neuronal pentraxin-1
OID30390	NPTX2	Cardiometabolic_II	NPTX2	P47972	7	98617285	98629869	Neuronal pentraxin-2
OID20191	NPTXR	Cardiometabolic	NPTXR	O95502	22	38818452	38844028	Neuronal pentraxin receptor
OID21388	NPY	Oncology	NPY	P01303	7	24284188	24291862	Pro-neuropeptide Y
OID20229	NRCAM	Cardiometabolic	NRCAM	Q92823	7	108147623	108456717	Neuronal cell adhesion molecule
OID30674	NRGN	Inflammation_II	NRGN	Q92686	11	124739942	124747210	Neurogranin
OID30983	NRN1	Neurology_II	NRN1	Q9NPD7	6	5997999	6007605	Neuritin
OID20390	NRP1	Cardiometabolic	NRP1	O14786	10	33177492	33336262	Neuropilin-1
OID21081	NRP2	Neurology	NRP2	O60462	2	205681990	205798133	Neuropilin-2
OID20465	NRTN	Inflammation	NRTN	Q99748	19	5805067	5828324	Neurturin
OID30901	NRXN3	Neurology_II	NRXN3	Q9Y4C0	14	78170373	79868291	Neurexin-3
OID21022	NSFL1C	Neurology	NSFL1C	Q9UNZ2	20	1442162	1473842	NSFL1 cofactor p47
OID30294	NT5C	Cardiometabolic_II	NT5C	Q8TCD5	17	75130225	75131757	5'(3')-deoxyribonucleotidase, cytosolic type
OID31102	NT5C1A	Neurology_II	NT5C1A	Q9BXI3	1	39651229	39672107	Cytosolic 5'-nucleotidase 1A
OID20553	NT5C3A	Inflammation	NT5C3A	Q9H0P0	7	33014130	33062796	Cytosolic 5'-nucleotidase 3A
OID21498	NT5E	Oncology	NT5E	P21589	6	85449584	85495791	5'-nucleotidase
OID20591	NTF3	Inflammation	NTF3	P20783	12	5432108	5521536	Neurotrophin-3
OID21208	NTF4	Oncology	NTF4	P34130	19	49061066	49065054	Neurotrophin-4
OID20136	NTRK2	Cardiometabolic	NTRK2	Q16620	9	84668375	85095751	BDNF/NT-3 growth factors receptor
OID21057	NTRK3	Neurology	NTRK3	Q16288	15	87859751	88256768	NT-3 growth factor receptor
OID20125	NTproBNP	Cardiometabolic	NPPB	P16860	1	11857464	11858945	N-terminal prohormone of brain natriuretic peptide
OID20510	NUB1	Inflammation	NUB1	Q9Y5A7	7	151341772	151378449	NEDD8 ultimate buster 1
OID31412	NUBP1	Oncology_II	NUBP1	P53384	16	10743786	10769351	Cytosolic Fe-S cluster assembly factor NUBP1
OID21448	NUCB2	Oncology	NUCB2	P80303	11	17208153	17349980	Nucleobindin-2
OID20623	NUDC	Inflammation	NUDC	Q9Y266	1	26900238	26946871	Nuclear migration protein nudC
OID30198	NUDT10	Cardiometabolic_II	NUDT10	Q8NFP7	X	51332231	51337525	Diphosphoinositol polyphosphate phosphohydrolase 3-alpha
OID30102	NUDT15	Cardiometabolic_II	NUDT15	Q9NV35	13	48037726	48047221	Nucleotide triphosphate diphosphatase NUDT15
OID31484	NUDT16	Oncology_II	NUDT16	Q96DE0	3	131381671	131388830	U8 snoRNA-decapping enzyme
OID21308	NUDT2	Oncology	NUDT2	P50583	9	34329506	34343711	Bis(5'-nucleosyl)-tetraphosphatase [asymmetrical]
OID21115	NUDT5	Neurology	NUDT5	Q9UKK9	10	12165330	12196144	ADP-sugar pyrophosphatase
OID30568	NUMB	Inflammation_II	NUMB	P49757	14	73275107	73458617	Protein numb homolog
OID30100	NUP50	Cardiometabolic_II	NUP50	Q9UKX7	22	45163925	45188017	Nuclear pore complex protein Nup50
OID30076	NXPE4	Cardiometabolic_II	NXPE4	Q6UWF7	11	114570591	114595786	NXPE family member 4
OID20849	NXPH1	Neurology	NXPH1	P58417	7	8433609	8752961	Neurexophilin-1
OID30565	NXPH3	Inflammation_II	NXPH3	O95157	17	49575871	49583827	Neurexophilin-3
OID20980	OBP2B	Neurology	OBP2B	Q9NPH6	9	133205277	133209250	Odorant-binding protein 2b
OID31069	OCLN	Neurology_II	OCLN	Q16625	5	69492292	69558104	Occludin
OID20793	ODAM	Neurology	ODAM	A1E959	4	70195725	70204576	Odontogenic ameloblast-associated protein
OID31268	OFD1	Oncology_II	OFD1	O75665	X	13734743	13777955	Oral-facial-digital syndrome 1 protein
OID31465	OGA	Oncology_II	OGA	O60502	10	101784443	101818465	Protein O-GlcNAcase
OID21360	OGFR	Oncology	OGFR	Q9NZT2	20	62804835	62814000	Opioid growth factor receptor
OID21123	OGN	Neurology	OGN	P20774	9	92383268	92404696	Mimecan
OID31300	OGT	Oncology_II	OGT	O15294	X	71533087	71575892	UDP-N-acetylglucosamine--peptide N-acetylglucosaminyltransferase 110 kDa subunit
OID30665	OLFM4	Inflammation_II	OLFM4	Q6UX06	13	53028813	53052057	Olfactomedin-4
OID20183	OLR1	Cardiometabolic	OLR1	P78380	12	10158301	10172138	Oxidized low-density lipoprotein receptor 1
OID20725	OMD	Inflammation	OMD	Q99983	9	92412380	92424471	Osteomodulin
OID21352	OMG	Oncology	OMG	P23515	17	31272013	31297539	Oligodendrocyte-myelin glycoprotein
OID30835	OMP	Neurology_II	OMP	P47874	11	77102840	77103331	Olfactory marker protein
OID31087	OPHN1	Neurology_II	OPHN1	O60890	X	67949349	68433913	Oligophrenin-1
OID30201	OPLAH	Cardiometabolic_II	OPLAH	O14841	8	144051266	144063965	5-oxoprolinase
OID21362	OPTC	Oncology	OPTC	Q9UBM4	1	203494153	203508949	Opticin
OID30768	ORM1	Inflammation_II	ORM1	P02763	9	114323098	114326479	Alpha-1-acid glycoprotein 1
OID31085	OSBPL2	Neurology_II	OSBPL2	Q9H1P3	20	62231922	62296213	Oxysterol-binding protein-related protein 2
OID20776	OSCAR	Inflammation	OSCAR	Q8IYS5	19	54094668	54102692	Osteoclast-associated immunoglobulin-like receptor
OID20574	OSM	Inflammation	OSM	P13725	22	30262829	30266851	Oncostatin-M
OID20356	OSMR	Cardiometabolic	OSMR	Q99650	5	38845858	38945596	Oncostatin-M-specific receptor subunit beta
OID30909	OSTN	Neurology_II	OSTN	P61366	3	191199241	191265615	Osteocrin
OID30825	OTOA	Neurology_II	OTOA	Q7RTW8	16	21663968	21761935	Otoancorin
OID31487	OTUD6B	Oncology_II	OTUD6B	Q8N6M0	8	91070196	91087095	Deubiquitinase OTUD6B
OID31064	OTUD7B	Neurology_II	OTUD7B	Q6GQQ9	1	149937812	150010726	OTU domain-containing protein 7B
OID30227	OXCT1	Cardiometabolic_II	OXCT1	P55809	5	41730065	41870425	Succinyl-CoA:3-ketoacid coenzyme A transferase 1, mitochondrial
OID21047	OXT	Neurology	OXT	P01178	20	3071620	3072517	Oxytocin-neurophysin 1
OID21509	P4HB	Oncology	P4HB	P07237	17	81843159	81860856	Protein disulfide-isomerase
OID30186	PACS2	Cardiometabolic_II	PACS2	Q86VP3	14	105300563	105398147	Phosphofurin acidic cluster sorting protein 2
OID20467	PADI2	Inflammation	PADI2	Q9Y2J8	1	17066761	17119451	Protein-arginine deiminase type-2
OID20832	PADI4	Neurology	PADI4	Q9UM07	1	17308195	17364004	Protein-arginine deiminase type-4
OID20925	PAEP	Neurology	PAEP	P09466	9	135561756	135566955	Glycodelin
OID30998	PAFAH1B3	Neurology_II	PAFAH1B3	Q15102	19	42297033	42303546	Platelet-activating factor acetylhydrolase IB subunit alpha1
OID31286	PAFAH2	Oncology_II	PAFAH2	Q99487	1	25959767	25998117	Platelet-activating factor acetylhydrolase 2, cytoplasmic
OID20108	PAG1	Cardiometabolic	PAG1	Q9NWQ8	8	80967810	81112068	Phosphoprotein associated with glycosphingolipid-enriched microdomains 1
OID30206	PAGR1	Cardiometabolic_II	PAGR1	Q9BTK6	16	29816152	29822489	PAXIP1-associated glutamate-rich protein 1
OID31228	PAIP2B	Oncology_II	PAIP2B	Q9ULR5	2	71182738	71227103	Polyadenylate-binding protein-interacting protein 2B
OID20819	PAK4	Neurology	PAK4	O96013	19	39125770	39182816	Serine/threonine-protein kinase PAK 4
OID30444	PALLD	Inflammation_II	PALLD	Q8WX93	4	168497052	168928457	Palladin
OID31515	PALM	Oncology_II	PALM	O75781	19	708935	748329	Paralemmin-1
OID31096	PALM2	Neurology_II	PALM2AKAP2	Q8IXS6	9	109498325	110172512	Paralemmin-2
OID30182	PALM3	Cardiometabolic_II	PALM3	A6NDB9	19	14053363	14062076	Paralemmin-3
OID20291	PAM	Cardiometabolic	PAM	P19021	5	102753981	103029730	Peptidyl-glycine alpha-amidating monooxygenase
OID21153	PAMR1	Neurology	PAMR1	Q6UXH9	11	35431823	35530300	Inactive serine protease PAMR1
OID20421	PAPPA	Inflammation	PAPPA	Q13219	9	116153791	116402321	Pappalysin-1
OID31301	PARD3	Oncology_II	PARD3	Q8TEW0	10	34109560	34815325	Partitioning defective 3 homolog
OID21160	PARK7	Neurology	PARK7	Q99497	1	7954291	7985505	Parkinson disease protein 7
OID20500	PARP1	Inflammation	PARP1	P09874	1	226360210	226408154	Poly [ADP-ribose] polymerase 1
OID30591	PAXX	Inflammation_II	PAXX	Q9BUH6	9	136992422	136993984	Protein PAXX
OID31158	PBK	Oncology_II	PBK	Q96KB5	8	27809624	27838082	Lymphokine-activated killer T-cell-originated protein kinase
OID20839	PBLD	Neurology	PBLD	P30039	10	68282660	68333049	Phenazine biosynthesis-like domain-containing protein
OID31435	PBXIP1	Oncology_II	PBXIP1	Q96AQ6	1	154944076	154956123	Pre-B-cell leukemia transcription factor-interacting protein 1
OID30838	PCARE	Neurology_II	PCARE	A6NGG8	2	29060976	29074523	Photoreceptor cilium actin regulator
OID30610	PCBD1	Inflammation_II	PCBD1	P61457	10	70882280	70888565	Pterin-4-alpha-carbinolamine dehydratase
OID31003	PCBP2	Neurology_II	PCBP2	Q15366	12	53452102	53481162	Poly(rC)-binding protein 2
OID20614	PCDH1	Inflammation	PCDH1	Q08174	5	141853090	141879246	Protocadherin-1
OID31045	PCDH12	Neurology_II	PCDH12	Q9NPG4	5	141943581	141969741	Protocadherin-12
OID20132	PCDH17	Cardiometabolic	PCDH17	O14917	13	57631744	57729311	Protocadherin-17
OID31456	PCDH7	Oncology_II	PCDH7	O60245	4	30720369	31146805	Protocadherin-7
OID31516	PCDH9	Oncology_II	PCDH9	Q9HC56	13	66302834	67230445	Protocadherin-9
OID31377	PCDHB15	Oncology_II	PCDHB15	Q9Y5E8	5	141245395	141249365	Protocadherin beta-15
OID31161	PCNA	Oncology_II	PCNA	P12004	20	5114953	5126626	Proliferating cell nuclear antigen
OID20384	PCOLCE	Cardiometabolic	PCOLCE	Q15113	7	100602363	100608175	Procollagen C-endopeptidase enhancer 1
OID31410	PCSK7	Oncology_II	PCSK7	Q16549	11	117204337	117232525	Proprotein convertase subtilisin/kexin type 7
OID20235	PCSK9	Cardiometabolic	PCSK9	Q8NBP7	1	55039447	55064852	Proprotein convertase subtilisin/kexin type 9
OID31519	PCYT2	Oncology_II	PCYT2	Q99447	17	81900958	81911432	Ethanolamine-phosphate cytidylyltransferase
OID30323	PDAP1	Cardiometabolic_II	PDAP1	Q13442	7	99392048	99408597	28 kDa heat- and acid-stable phosphoprotein
OID21396	PDCD1	Oncology	PDCD1	Q15116	2	241849884	241858894	Programmed cell death protein 1
OID21273	PDCD1LG2	Oncology	PDCD1LG2	Q9BQ51	9	5510531	5571282	Programmed cell death 1 ligand 2
OID21021	PDCD5	Neurology	PDCD5	O14737	19	32581190	32587453	Programmed cell death protein 5
[truncated: 925 more rows]
